# Supplementary material for: Methylglyoxal attenuates insulin signaling and downregulates the enzymes involved in cholesterol biosynthesis
Source: Royal Society of Chemistry journal article supplement (doi:10.1039/c7mb00305f), 2017-09-07

## **Methylglyoxal impairs insulin signaling, downregulates the enzymes involved in cholesterol biosynthesis and decreases glucose uptake**

Arati B Deshmukh<sup>1</sup>, Shakuntala Bai<sup>1</sup>, Aarthy T<sup>1</sup>, Rubina S Kazi<sup>1</sup>, Reema Banarjee<sup>1</sup>,  
Rajeshwari Rathore<sup>1</sup>, Vijayakumar MV<sup>2</sup>, Thulasiram HV<sup>1</sup>, Manoj Kumar Bhat<sup>2</sup>,  
Kulkarni MJ<sup>1\*</sup>

<sup>1</sup> - CSIR-National Chemical Laboratory, Pune-411008, India

<sup>2</sup>- National Centre for Cell Science, Pune-411007, India

\*Corresponding Author:

Mahesh J Kulkarni, PhD

Scientist, Proteomics Facility

Division of Biochemical Sciences

CSIR-National Chemical Laboratory

Pune-411008, India

Phone: +912025902541

E-mail: [mj.kulkarni@ncl.res.in](mailto:mj.kulkarni@ncl.res.in)

## Table of Content

Figure S-1 PCA plot for SWATH acquisitions

Figure S-2 A Standard Curve for Quantification

Figure S-2 B Representative Chromatogram

Figure S-2 C Spectral Matching with NIST Library for identification of metabolites

**Figure S-1** Depicting the PCA plot of all replicate acquisitions of different treatment are clustered together suggesting the reproducibility of replicate acquisition.

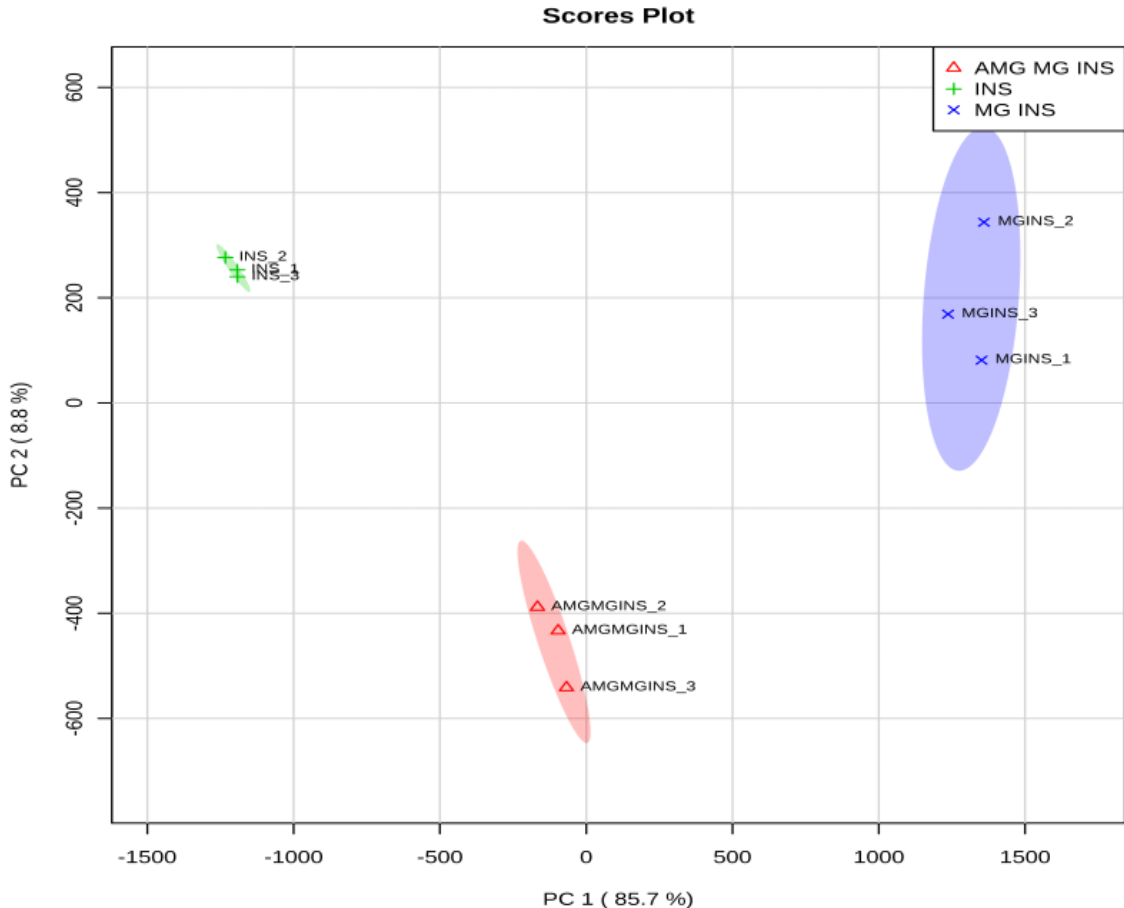

Figure S-2 A Standard Curve for Cholesterol Quantification

1. Cholest-4-en-one

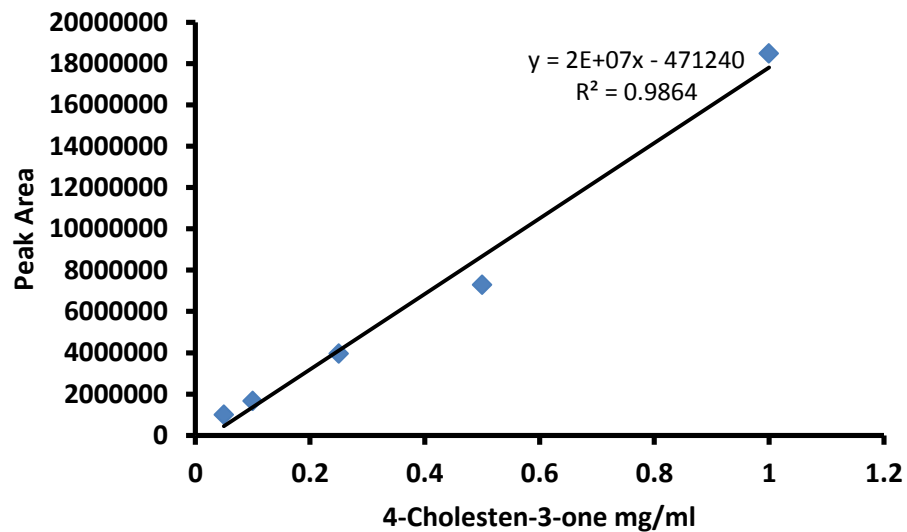

2. Cholesterol

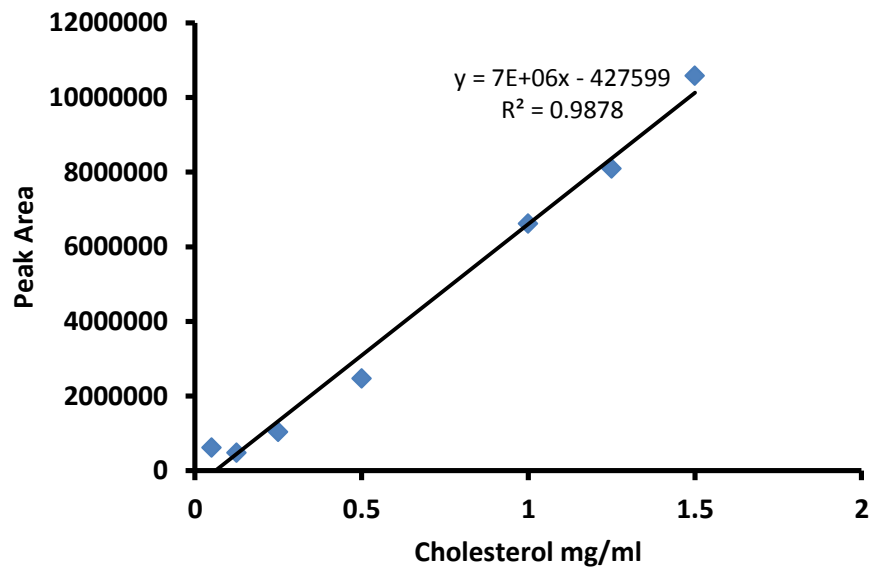

**Figure S-2 B Representative Chromatogram depicting the peak areas for cholesterol, desmosterol and Cholest-4-en-one**

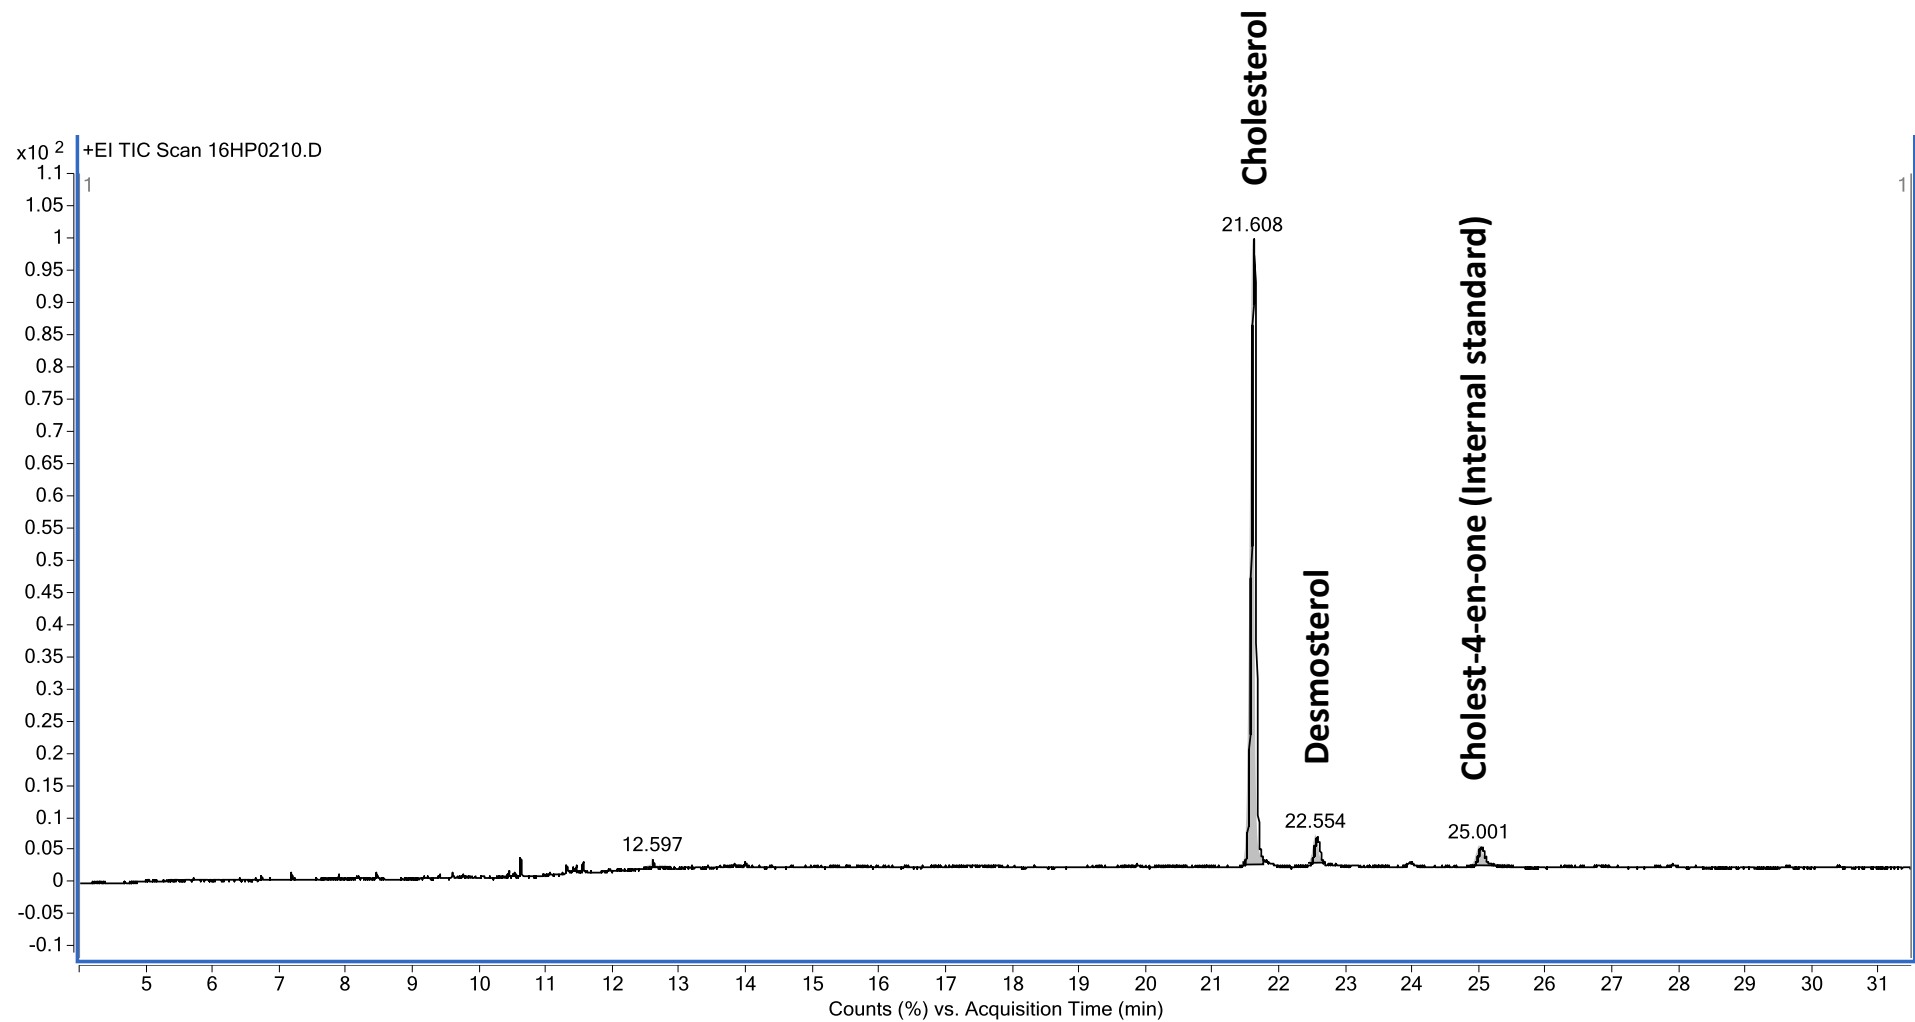

**Figure S-2 C Spectral Matching with NIST Library for Cholesterol, Desmosterol and Cholest-4-en-one resp.**

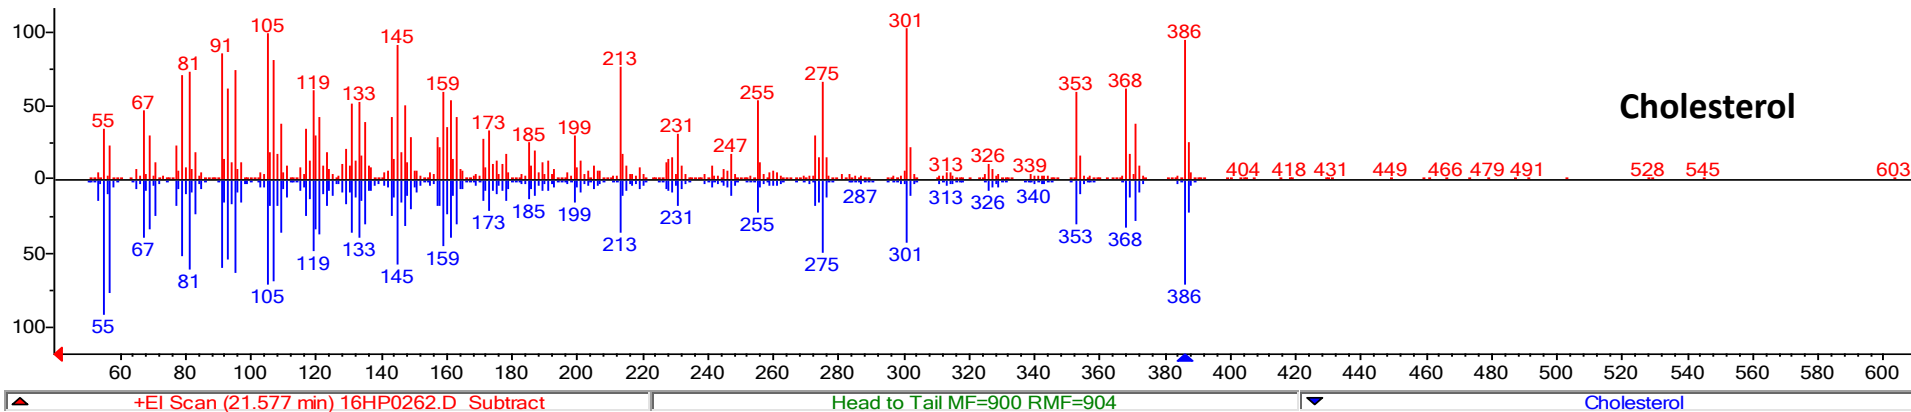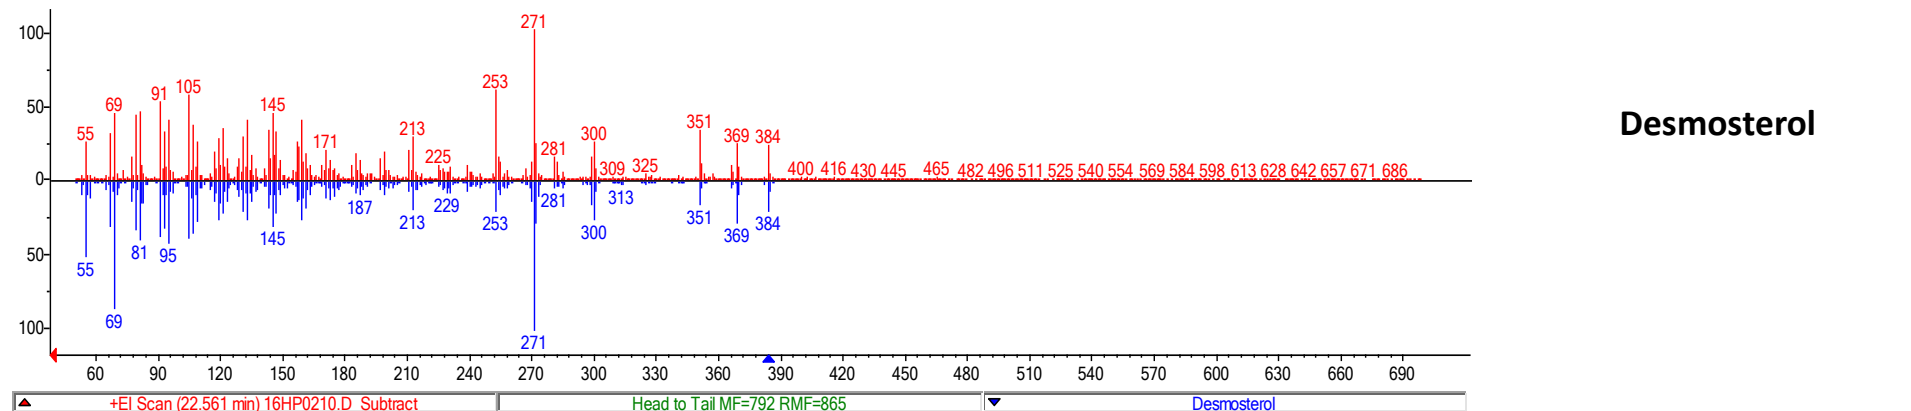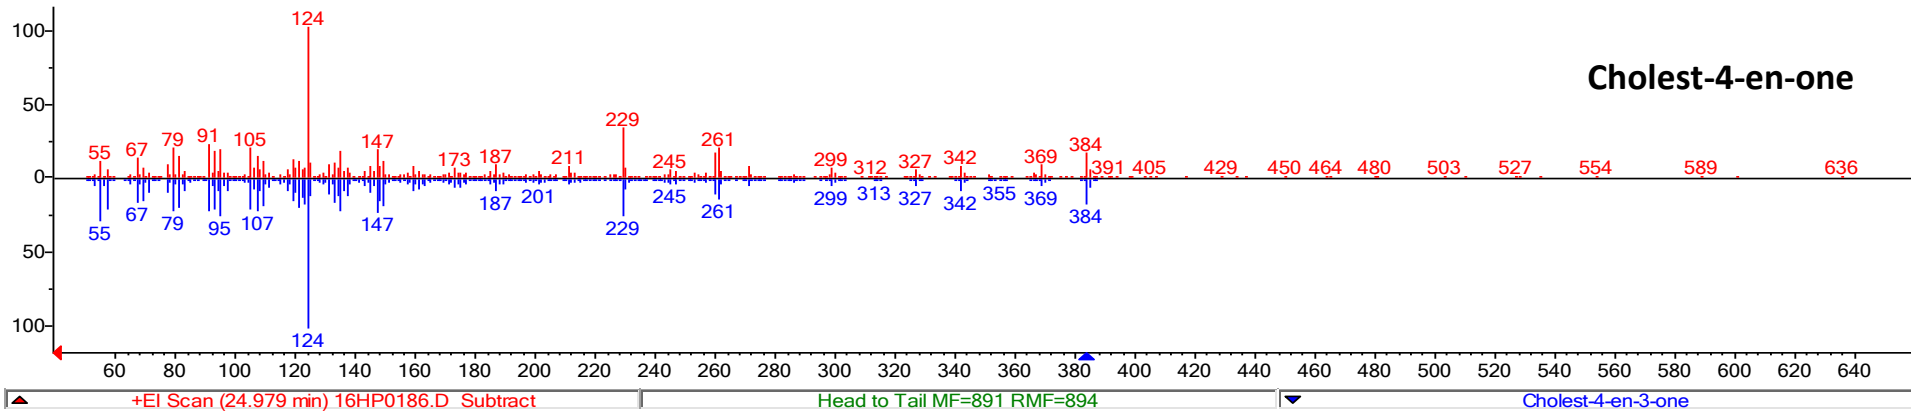

Supplement: c7mb00305f3.pdf [file c7mb00305f3.pdf]
