# Supplementary material for: Methylglyoxal attenuates insulin signaling and downregulates the enzymes involved in cholesterol biosynthesis
Source: Royal Society of Chemistry journal article supplement (doi:10.1039/c7mb00305f), 2017-09-07
Supplement: c7mb00305f4.xlsx [file c7mb00305f4.xlsx]

## Sheet: Table S-1
	Table S-1	List of proteins identified in IDA analysis by Protein Pilot software
	Sr. No.	N	Unused	Total	%Cov	%Cov(50)	%Cov(95)	Accession	Name	Species	Peptides(95%)
	1	1	240.54	240.54	41.99	33.91	29.56	sp|Q9JI55|PLEC_CRIGR	Plectin (Fragment) OS=Cricetulus griseus GN=PLEC PE=1 SV=1	CRIGR	123
	2	1	240.54	240.54	41.99	33.91	29.56	sp|Q9JI55|PLEC_CRIGR	Plectin (Fragment) OS=Cricetulus griseus GN=PLEC PE=1 SV=1	CRIGR	123
	3	5	114.31	114.31	90.77	89.7	85.62	tr|G3HHR3|G3HHR3_CRIGR	Vimentin OS=Cricetulus griseus GN=I79_010171 PE=3 SV=1	CRIGR	101
	4	2	158.55	158.55	56.47	48.51	43.63	tr|G3IH63|G3IH63_CRIGR	Myosin-9 OS=Cricetulus griseus GN=I79_023145 PE=4 SV=1	CRIGR	93
	5	3	147.23	147.23	46.22	43.77	41.8	tr|G3IBK2|G3IBK2_CRIGR	Filamin-A OS=Cricetulus griseus GN=I79_021027 PE=4 SV=1	CRIGR	85
	6	36	53.52	150.21	62.74	55.16	50.24	tr|G3HWJ3|G3HWJ3_CRIGR	Putative uncharacterized protein OS=Cricetulus griseus GN=I79_015376 PE=4 SV=1	CRIGR	78
	7	8	95.83	95.83	61.93	61.93	60.7	tr|G3I8R9|G3I8R9_CRIGR	78 kDa glucose-regulated protein OS=Cricetulus griseus GN=I79_019946 PE=1 SV=1	CRIGR	70
	8	4	127.07	130.5	45.54	38.39	36.2	tr|G3HFM4|G3HFM4_CRIGR	Filamin-B OS=Cricetulus griseus GN=I79_009386 PE=4 SV=1	CRIGR	69
	9	11	80.51	84.51	69.04	67.03	65.33	sp|P19378|HSP7C_CRIGR	Heat shock cognate 71 kDa protein OS=Cricetulus griseus GN=HSPA8 PE=2 SV=1	CRIGR	64
	10	9	95.56	95.56	88.77	86.44	85.17	tr|G3H3Q1|G3H3Q1_CRIGR	Pyruvate kinase OS=Cricetulus griseus GN=I79_004880 PE=3 SV=1	CRIGR	63
	11	6	107.73	107.73	46.25	37.37	31.47	tr|G3I9X8|G3I9X8_CRIGR	Spectrin alpha chain, brain OS=Cricetulus griseus GN=I79_020389 PE=4 SV=1	CRIGR	56
	12	24	60.93	60.93	77.33	76.27	76.27	tr|G3GVD0|G3GVD0_CRIGR	Actin, cytoplasmic 1 OS=Cricetulus griseus GN=I79_001666 PE=3 SV=1	CRIGR	56
	13	24	0	60.93	77.33	76.27	76.27	sp|P48975|ACTB_CRIGR	Actin, cytoplasmic 1 OS=Cricetulus griseus GN=ACTB PE=3 SV=1	CRIGR	56
	14	28	58	58	72.52	66.89	66.89	tr|Q60455|Q60455_CRIGR	Beta tubulin OS=Cricetulus griseus PE=2 SV=1	CRIGR	56
	15	525	10	55.96	69.37	68.69	68.69	tr|G3HQP8|G3HQP8_CRIGR	Tubulin beta-7 chain OS=Cricetulus griseus GN=I79_013153 PE=3 SV=1	CRIGR	56
	16	525	0	55.96	69.37	68.69	68.69	sp|P69893|TBB5_CRIGR	Tubulin beta-5 chain OS=Cricetulus griseus GN=TUBB5 PE=1 SV=1	CRIGR	56
	17	6	107.73	107.73	46.25	37.37	31.47	tr|G3I9X8|G3I9X8_CRIGR	Spectrin alpha chain, brain OS=Cricetulus griseus GN=I79_020389 PE=4 SV=1	CRIGR	56
	18	7	99.2	99.2	35.72	30.72	27.41	tr|G3GXD7|G3GXD7_CRIGR	Fatty acid synthase OS=Cricetulus griseus GN=I79_002427 PE=4 SV=1	CRIGR	53
	19	35	54.59	54.59	81.68	81.68	79.28	sp|P17244|G3P_CRIGR	Glyceraldehyde-3-phosphate dehydrogenase OS=Cricetulus griseus GN=GAPDH PE=2 SV=2	CRIGR	52
	20	10	87.77	87.77	25.07	16.57	14	tr|G3H352|G3H352_CRIGR	Cytoplasmic dynein 1 heavy chain 1 (Fragment) OS=Cricetulus griseus GN=I79_004663 PE=4 SV=1	CRIGR	51
	21	10	87.77	87.77	25.07	16.57	14	tr|G3H352|G3H352_CRIGR	Cytoplasmic dynein 1 heavy chain 1 (Fragment) OS=Cricetulus griseus GN=I79_004663 PE=4 SV=1	CRIGR	51
	22	20	67.18	93.82	43.57	31.68	29.4	tr|G3GY44|G3GY44_CRIGR	Myosin-10 OS=Cricetulus griseus GN=I79_002699 PE=4 SV=1	CRIGR	50
	23	20	67.18	93.82	43.57	31.68	29.4	tr|G3GY44|G3GY44_CRIGR	Myosin-10 OS=Cricetulus griseus GN=I79_002699 PE=4 SV=1	CRIGR	50
	24	16	72.13	72.13	69.39	65.4	64.07	tr|G3HL13|G3HL13_CRIGR	60 kDa heat shock protein, mitochondrial OS=Cricetulus griseus GN=I79_011398 PE=3 SV=1	CRIGR	49
	25	16	0	72.13	63.7	60.03	58.81	sp|P18687|CH60_CRIGR	60 kDa heat shock protein, mitochondrial OS=Cricetulus griseus GN=HSPD1 PE=2 SV=1	CRIGR	49
	26	13	79.21	79.21	52.29	45.76	45.41	tr|G3HSL4|G3HSL4_CRIGR	Elongation factor 2 OS=Cricetulus griseus GN=I79_013848 PE=4 SV=1	CRIGR	47
	27	13	0	77.19	49.88	42.07	41.72	sp|P09445|EF2_CRIGR	Elongation factor 2 OS=Cricetulus griseus GN=EEF2 PE=1 SV=4	CRIGR	45
	28	12	79.84	79.84	63.57	54.04	53.27	tr|G3H1K9|G3H1K9_CRIGR	Alpha-actinin-1 OS=Cricetulus griseus GN=I79_004057 PE=4 SV=1	CRIGR	44
	29	14	76.62	76.62	54.16	50.75	47.61	sp|P46633|HS90A_CRIGR	Heat shock protein HSP 90-alpha OS=Cricetulus griseus GN=HSP90AA1 PE=2 SV=2	CRIGR	43
	30	15	75.57	75.57	57.12	51.48	47.85	sp|P18708|NSF_CRIGR	Vesicle-fusing ATPase OS=Cricetulus griseus GN=NSF PE=1 SV=1	CRIGR	42
	31	18	69.69	70.4	54.79	48.44	44.21	tr|G3HQM6|G3HQM6_CRIGR	Endoplasmin OS=Cricetulus griseus GN=I79_013131 PE=3 SV=1	CRIGR	41
	32	31	57.3	57.3	79.4	79.4	79.4	tr|G3I4H6|G3I4H6_CRIGR	Fructose-bisphosphate aldolase OS=Cricetulus griseus GN=I79_018355 PE=3 SV=1	CRIGR	40
	33	19	68.42	68.42	29.64	24.59	21.68	tr|G3HJ89|G3HJ89_CRIGR	Clathrin heavy chain OS=Cricetulus griseus GN=I79_010729 PE=3 SV=1	CRIGR	39
	34	17	71.17	71.17	54.33	46.02	39.11	tr|G3GWQ1|G3GWQ1_CRIGR	Vinculin OS=Cricetulus griseus GN=I79_002180 PE=4 SV=1	CRIGR	38
	35	21	66.92	66.92	51.32	42.25	42.25	tr|G3IBG3|G3IBG3_CRIGR	Ubiquitin activating enzyme E1 OS=Cricetulus griseus GN=Uba1 PE=2 SV=1	CRIGR	37
	36	34	55.34	55.34	56.64	56.64	53.85	tr|G3IAQ0|G3IAQ0_CRIGR	Alpha-enolase OS=Cricetulus griseus GN=I79_020676 PE=3 SV=1	CRIGR	36
	37	25	59.86	59.86	80.06	77.17	71.97	tr|G3I5L3|G3I5L3_CRIGR	Annexin OS=Cricetulus griseus GN=I79_018766 PE=3 SV=1	CRIGR	35
	38	27	58.8	58.8	61.39	59.41	58.61	tr|Q91Z81|Q91Z81_CRIGR	ERP57 protein OS=Cricetulus griseus PE=2 SV=1	CRIGR	35
	39	53	45.21	45.21	57.58	53.46	52.16	tr|Q540F6|Q540F6_CRIGR	Elongation factor 1-alpha OS=Cricetulus griseus PE=3 SV=1	CRIGR	35
	40	53	0	45.21	57.58	53.46	52.16	sp|P62629|EF1A1_CRIGR	Elongation factor 1-alpha 1 OS=Cricetulus griseus GN=EEF1A1 PE=2 SV=1	CRIGR	35
	41	25	59.86	59.86	80.06	77.17	71.97	tr|G3I5L3|G3I5L3_CRIGR	Annexin OS=Cricetulus griseus GN=I79_018766 PE=3 SV=1	CRIGR	35
	42	1093	3.23	54.82	68.02	65.77	64.86	tr|G3H0U6|G3H0U6_CRIGR	Protein disulfide-isomerase A3 OS=Cricetulus griseus GN=I79_003765 PE=4 SV=1	CRIGR	34
	43	30	57.42	57.42	55.54	55.54	54.25	tr|G3GUU5|G3GUU5_CRIGR	Transketolase OS=Cricetulus griseus GN=I79_001469 PE=3 SV=1	CRIGR	33
	44	39	52.24	52.24	61.15	58.99	57.31	tr|G3HCX8|G3HCX8_CRIGR	Calreticulin OS=Cricetulus griseus GN=I79_008346 PE=3 SV=1	CRIGR	33
	45	30	57.42	57.42	55.54	55.54	54.25	tr|G3GUU5|G3GUU5_CRIGR	Transketolase OS=Cricetulus griseus GN=I79_001469 PE=3 SV=1	CRIGR	33
	46	22	65.08	65.08	45.98	39.98	30.21	tr|G3H4V0|G3H4V0_CRIGR	Vigilin OS=Cricetulus griseus GN=I79_005313 PE=4 SV=1	CRIGR	32
	47	51	45.72	45.72	80.4	79.4	79.4	sp|Q9JKY1|PRDX1_CRIGR	Peroxiredoxin-1 OS=Cricetulus griseus GN=PRDX1 PE=1 SV=1	CRIGR	32
	48	80	37.18	50.71	70.15	66.5	63.11	tr|G3HC84|G3HC84_CRIGR	Heat shock protein HSP 90-beta OS=Cricetulus griseus GN=I79_008088 PE=4 SV=1	CRIGR	32
	49	22	65.08	65.08	45.98	39.98	30.21	tr|G3H4V0|G3H4V0_CRIGR	Vigilin OS=Cricetulus griseus GN=I79_005313 PE=4 SV=1	CRIGR	32
	50	29	57.7	57.7	65.88	64.7	58.61	tr|G3I1V4|G3I1V4_CRIGR	Bifunctional purine biosynthesis protein PURH OS=Cricetulus griseus GN=I79_017373 PE=4 SV=1	CRIGR	31
	51	43	46.93	46.93	83.69	68.59	65.71	sp|P50310|PGK1_CRIGR	Phosphoglycerate kinase 1 OS=Cricetulus griseus GN=PGK1 PE=2 SV=2	CRIGR	31
	52	51	0	43.7	78.39	77.39	77.39	tr|G3GYP9|G3GYP9_CRIGR	Peroxiredoxin-1 OS=Cricetulus griseus GN=I79_002954 PE=4 SV=1	CRIGR	31
	53	75	38.43	38.43	64.3	63.41	63.41	tr|G3I6I6|G3I6I6_CRIGR	Tubulin alpha-1A chain OS=Cricetulus griseus GN=I79_019110 PE=3 SV=1	CRIGR	31
	54	75	0	38.43	64.3	63.41	63.41	sp|P68361|TBA1B_CRIGR	Tubulin alpha-1B chain OS=Cricetulus griseus GN=TUBA1B PE=2 SV=1	CRIGR	31
	55	782	6	39.23	41.38	41.38	41.38	tr|G3H5Q0|G3H5Q0_CRIGR	Actin, alpha cardiac muscle 1 OS=Cricetulus griseus GN=I79_005636 PE=3 SV=1	CRIGR	31
	56	23	63.57	63.57	41.36	32.66	28.96	tr|G3GRE1|G3GRE1_CRIGR	Bifunctional aminoacyl-tRNA synthetase (Fragment) OS=Cricetulus griseus GN=I79_000086 PE=3 SV=1	CRIGR	30
	57	26	58.99	58.99	54.52	44.7	42.06	tr|G3IDT6|G3IDT6_CRIGR	Protein disulfide-isomerase A4 OS=Cricetulus griseus GN=I79_021872 PE=3 SV=1	CRIGR	30
	58	37	52.67	52.67	53.61	41.42	36.79	tr|G3GZ85|G3GZ85_CRIGR	Nuclease domain-containing protein 1 OS=Cricetulus griseus GN=I79_003116 PE=4 SV=1	CRIGR	30
	59	75	0	36.39	55.56	54.67	54.67	tr|Q5VLK2|Q5VLK2_CRIGR	Alpha tubulin (Fragment) OS=Cricetulus griseus GN=Calpha1 PE=3 SV=1	CRIGR	30
	60	33	55.83	55.83	63.77	55.24	50.44	tr|G3HG95|G3HG95_CRIGR	Lamin-A/C OS=Cricetulus griseus GN=I79_009616 PE=3 SV=1	CRIGR	29
	61	198	22	40.22	57.05	57.05	56.82	tr|Q4F888|Q4F888_CRIGR	Class V beta tubulin OS=Cricetulus griseus PE=2 SV=1	CRIGR	29
	62	32	56.63	56.63	21.42	17.2	15.52	tr|G3HN02|G3HN02_CRIGR	Talin-1 OS=Cricetulus griseus GN=I79_012132 PE=3 SV=1	CRIGR	28
	63	38	52.65	52.65	34.51	25.25	22.99	tr|G3IF62|G3IF62_CRIGR	Ras GTPase-activating-like protein IQGAP1 OS=Cricetulus griseus GN=I79_022378 PE=4 SV=1	CRIGR	28
	64	41	49.6	49.6	59.71	54.14	52.16	tr|G3HGP6|G3HGP6_CRIGR	T-complex protein 1 subunit alpha OS=Cricetulus griseus GN=I79_009786 PE=3 SV=1	CRIGR	28
	65	41	0	49.6	59.71	54.14	52.16	sp|P18279|TCPA_CRIGR	T-complex protein 1 subunit alpha OS=Cricetulus griseus GN=TCP1 PE=2 SV=1	CRIGR	28
	66	52	45.6	45.6	63.86	63.86	62.05	tr|Q06BU8|Q06BU8_CRIGR	L-lactate dehydrogenase OS=Cricetulus griseus PE=2 SV=1	CRIGR	28
	67	52	0	45.6	55.5	55.5	53.93	tr|G3I255|G3I255_CRIGR	L-lactate dehydrogenase OS=Cricetulus griseus GN=I79_017480 PE=3 SV=1	CRIGR	28
	68	32	56.63	56.63	21.42	17.2	15.52	tr|G3HN02|G3HN02_CRIGR	Talin-1 OS=Cricetulus griseus GN=I79_012132 PE=3 SV=1	CRIGR	28
	69	40	52.13	52.13	48.46	43.08	40.38	tr|G3II47|G3II47_CRIGR	Aconitate hydratase, mitochondrial OS=Cricetulus griseus GN=I79_023509 PE=4 SV=1	CRIGR	27
	70	47	46.62	47.81	51.4	47.28	45.21	sp|O35501|GRP75_CRIGR	Stress-70 protein, mitochondrial OS=Cricetulus griseus GN=HSPA9 PE=2 SV=1	CRIGR	27
	71	782	0	35.28	25.59	20.06	20.06	tr|G3I4A0|G3I4A0_CRIGR	Actin, gamma-enteric smooth muscle (Fragment) OS=Cricetulus griseus GN=I79_018277 PE=3 SV=1	CRIGR	27
	72	782	0	35.14	35.21	32.73	32.73	tr|G3HQY2|G3HQY2_CRIGR	Actin, aortic smooth muscle OS=Cricetulus griseus GN=I79_013242 PE=3 SV=1	CRIGR	27
	73	783	6	36.39	59.91	57.24	57.24	sp|P68365|TBA1C_CRIGR	Tubulin alpha-1C chain OS=Cricetulus griseus GN=TUBA1C PE=2 SV=1	CRIGR	27
	74	42	49.37	49.37	44.12	37.5	33.65	tr|G3H4Z5|G3H4Z5_CRIGR	C-1-tetrahydrofolate synthase, cytoplasmic OS=Cricetulus griseus GN=I79_005359 PE=3 SV=1	CRIGR	26
	75	50	45.92	45.92	64.47	63.45	61.93	tr|G3HRK0|G3HRK0_CRIGR	Proliferation-associated protein 2G4 OS=Cricetulus griseus GN=I79_013505 PE=4 SV=1	CRIGR	26
	76	56	44.6	44.6	51.79	46.89	46.7	tr|G3I2M1|G3I2M1_CRIGR	T-complex protein 1 subunit zeta OS=Cricetulus griseus GN=I79_017661 PE=3 SV=1	CRIGR	26
	77	57	44.18	44.18	54.62	46.17	41.45	sp|Q8R4U2|PDIA1_CRIGR	Protein disulfide-isomerase OS=Cricetulus griseus GN=P4HB PE=2 SV=1	CRIGR	26
	78	62	42.59	42.59	42.17	34.24	32.15	tr|G3IF80|G3IF80_CRIGR	Nucleolin OS=Cricetulus griseus GN=I79_022400 PE=4 SV=1	CRIGR	25
	79	76	38.39	38.39	77.05	74.18	70.9	tr|G3IG05|G3IG05_CRIGR	Annexin OS=Cricetulus griseus GN=I79_022682 PE=3 SV=1	CRIGR	25
	80	105	32.46	50.59	61.64	54.75	49.84	tr|G3HC01|G3HC01_CRIGR	Tropomyosin alpha-3 chain OS=Cricetulus griseus GN=I79_008041 PE=3 SV=1	CRIGR	25
	81	45	46.67	46.67	51.89	39.59	35.41	tr|G3IKC3|G3IKC3_CRIGR	Glutathione S-transferase Mu 6 OS=Cricetulus griseus GN=I79_024324 PE=4 SV=1	CRIGR	24
	82	46	46.63	46.63	20.91	16.08	13.36	tr|G3HN14|G3HN14_CRIGR	Transitional endoplasmic reticulum ATPase OS=Cricetulus griseus GN=I79_012144 PE=4 SV=1	CRIGR	24
	83	49	45.95	45.95	51.52	36.48	34.03	sp|Q60446|HS105_CRIGR	Heat shock protein 105 kDa OS=Cricetulus griseus GN=HSPH1 PE=2 SV=1	CRIGR	24
	84	60	43.07	43.07	53.08	51.59	48.79	tr|G3HZ42|G3HZ42_CRIGR	T-complex protein 1 subunit beta OS=Cricetulus griseus GN=I79_016337 PE=3 SV=1	CRIGR	24
	85	63	42.41	42.41	40.2	36.83	34.16	tr|G3GT56|G3GT56_CRIGR	Trifunctional purine biosynthetic protein adenosine-3 OS=Cricetulus griseus GN=I79_000830 PE=3 SV=1	CRIGR	24
	86	63	0	42.41	39.11	36.83	34.16	tr|B2ZA78|B2ZA78_CRIGR	Phosphoribosylglycinamide transformylase OS=Cricetulus griseus GN=GART PE=2 SV=1	CRIGR	24
	87	66	41.57	41.57	49.8	44.43	39.32	tr|G3GXQ3|G3GXQ3_CRIGR	Trifunctional enzyme subunit alpha, mitochondrial OS=Cricetulus griseus GN=I79_002545 PE=3 SV=1	CRIGR	24
	88	72	38.73	42.85	47.58	40.63	38.52	tr|G3GSH5|G3GSH5_CRIGR	ATP-dependent RNA helicase DDX3X OS=Cricetulus griseus GN=I79_000589 PE=4 SV=1	CRIGR	24
	89	46	46.63	46.63	20.91	16.08	13.36	tr|G3HN14|G3HN14_CRIGR	Transitional endoplasmic reticulum ATPase OS=Cricetulus griseus GN=I79_012144 PE=4 SV=1	CRIGR	24
	90	48	46.5	46.5	63.31	46.25	37.03	tr|G3HWC3|G3HWC3_CRIGR	Ezrin OS=Cricetulus griseus GN=I79_015278 PE=4 SV=1	CRIGR	23
	91	54	44.99	44.99	46.89	43.64	39.94	tr|G3H576|G3H576_CRIGR	Annexin OS=Cricetulus griseus GN=I79_005451 PE=3 SV=1	CRIGR	23
	92	1049	0	38.45	38.39	36.01	34.71	tr|G3IAX3|G3IAX3_CRIGR	Pyruvate kinase OS=Cricetulus griseus GN=I79_020755 PE=3 SV=1	CRIGR	23
	93	44	46.78	46.78	49.72	45.84	41.59	tr|G3H7K5|G3H7K5_CRIGR	T-complex protein 1 subunit epsilon OS=Cricetulus griseus GN=I79_006338 PE=3 SV=1	CRIGR	22
	94	64	41.94	41.94	35.74	29.03	26.63	tr|G3I973|G3I973_CRIGR	Hypoxia up-regulated protein 1 OS=Cricetulus griseus GN=I79_020107 PE=3 SV=1	CRIGR	22
	95	68	41.01	41.01	50.9	47.9	44.69	tr|G3HYB7|G3HYB7_CRIGR	T-complex protein 1 subunit eta OS=Cricetulus griseus GN=I79_016041 PE=3 SV=1	CRIGR	22
	96	78	37.78	38	35.29	23.86	22.63	tr|G3H7Y0|G3H7Y0_CRIGR	Coatomer subunit alpha OS=Cricetulus griseus GN=I79_006476 PE=4 SV=1	CRIGR	22
	97	87	35.98	35.98	50.39	43.36	39.26	tr|G3H7M8|G3H7M8_CRIGR	Heterogeneous nuclear ribonucleoprotein U OS=Cricetulus griseus GN=I79_006363 PE=4 SV=1	CRIGR	22
	98	162	24.96	42.21	47.64	41.46	38.21	tr|G3HCT4|G3HCT4_CRIGR	Putative ATP-dependent RNA helicase DDX5 OS=Cricetulus griseus GN=I79_008300 PE=4 SV=1	CRIGR	22
	99	87	35.98	35.98	50.39	43.36	39.26	tr|G3H7M8|G3H7M8_CRIGR	Heterogeneous nuclear ribonucleoprotein U OS=Cricetulus griseus GN=I79_006363 PE=4 SV=1	CRIGR	22
	100	68	41.01	41.01	50.9	47.9	44.69	tr|G3HYB7|G3HYB7_CRIGR	T-complex protein 1 subunit eta OS=Cricetulus griseus GN=I79_016041 PE=3 SV=1	CRIGR	22
	101	58	44.13	44.13	55.23	53.03	46.97	tr|G3HG83|G3HG83_CRIGR	T-complex protein 1 subunit gamma OS=Cricetulus griseus GN=I79_009604 PE=3 SV=1	CRIGR	21
	102	59	43.95	43.95	54.88	46.96	41.07	tr|G3I877|G3I877_CRIGR	Stress-induced-phosphoprotein 1 OS=Cricetulus griseus GN=I79_019739 PE=4 SV=1	CRIGR	21
	103	61	43.01	43.01	45.71	39.42	34.2	tr|G3IJD1|G3IJD1_CRIGR	Putative ATP-dependent RNA helicase DDX17 OS=Cricetulus griseus GN=I79_023964 PE=4 SV=1	CRIGR	21
	104	67	41.03	41.03	24.29	16.7	13.71	tr|G3HIT7|G3HIT7_CRIGR	Microtubule-associated protein 1B OS=Cricetulus griseus GN=I79_010564 PE=4 SV=1	CRIGR	21
	105	71	39.24	39.24	39.45	36.73	34.86	tr|G3HLV6|G3HLV6_CRIGR	ATP-citrate synthase OS=Cricetulus griseus GN=I79_011700 PE=4 SV=1	CRIGR	21
	106	77	37.95	40.01	33.33	30.25	27.16	tr|G3HLL4|G3HLL4_CRIGR	116 kDa U5 small nuclear ribonucleoprotein component OS=Cricetulus griseus GN=I79_011604 PE=4 SV=1	CRIGR	21
	107	85	36.22	36.22	56.12	48.2	46.52	tr|G3IDD4|G3IDD4_CRIGR	Serpin H1 OS=Cricetulus griseus GN=I79_021710 PE=3 SV=1	CRIGR	21
	108	86	36.1	36.1	84.94	84.94	80.72	tr|G3IDM2|G3IDM2_CRIGR	Cofilin-1 OS=Cricetulus griseus GN=I79_021805 PE=4 SV=1	CRIGR	21
	109	88	35.94	35.94	51.2	46.27	36.54	tr|G3GSW3|G3GSW3_CRIGR	Coatomer subunit beta' OS=Cricetulus griseus GN=I79_000735 PE=4 SV=1	CRIGR	21
	110	96	34.03	34.03	79.18	65.71	62.45	tr|G3HKZ1|G3HKZ1_CRIGR	14-3-3 protein zeta/delta OS=Cricetulus griseus GN=I79_011374 PE=3 SV=1	CRIGR	21
	111	55	44.96	44.96	75.96	71.01	64.49	tr|G3GR73|G3GR73_CRIGR	Rab GDP dissociation inhibitor beta OS=Cricetulus griseus GN=I79_000016 PE=4 SV=1	CRIGR	20
	112	65	41.79	41.79	77.57	71.86	66.92	sp|P47961|RS4_CRIGR	40S ribosomal protein S4 OS=Cricetulus griseus GN=RPS4 PE=2 SV=2	CRIGR	20
	113	69	40.74	40.74	38.95	35.43	31.2	tr|G3IG23|G3IG23_CRIGR	Alanyl-tRNA synthetase, cytoplasmic OS=Cricetulus griseus GN=I79_022700 PE=3 SV=1	CRIGR	20
	114	81	36.93	36.93	22.99	17.03	14.66	tr|G3GV47|G3GV47_CRIGR	Leucine-rich PPR motif-containing protein, mitochondrial OS=Cricetulus griseus GN=I79_001578 PE=4 SV=1	CRIGR	20
	115	93	34.99	34.99	53.32	46.33	46.33	tr|G3HNK4|G3HNK4_CRIGR	Dihydropyrimidinase-related protein 2 OS=Cricetulus griseus GN=I79_012342 PE=4 SV=1	CRIGR	20
	116	95	34.56	34.56	65.51	62.66	57.59	tr|G3HH30|G3HH30_CRIGR	Aldose reductase OS=Cricetulus griseus GN=I79_009926 PE=4 SV=1	CRIGR	20
	117	294	16.68	37.97	47.34	36.36	29.67	tr|G3HFP1|G3HFP1_CRIGR	Radixin OS=Cricetulus griseus GN=I79_009404 PE=4 SV=1	CRIGR	20
	118	447	11.75	41.3	60.38	49.43	49.43	tr|G3H4I2|G3H4I2_CRIGR	Tropomyosin beta chain OS=Cricetulus griseus GN=I79_005183 PE=3 SV=1	CRIGR	20
	119	1064	3.49	28.72	26.81	23.5	22.4	tr|G3H4Z8|G3H4Z8_CRIGR	Heat shock-related 70 kDa protein 2 OS=Cricetulus griseus GN=I79_005362 PE=3 SV=1	CRIGR	20
	120	69	40.74	40.74	38.95	35.43	31.2	tr|G3IG23|G3IG23_CRIGR	Alanyl-tRNA synthetase, cytoplasmic OS=Cricetulus griseus GN=I79_022700 PE=3 SV=1	CRIGR	20
	121	73	38.53	39.57	38.99	24.68	19.85	tr|G3HJS0|G3HJS0_CRIGR	Spectrin beta chain, brain 1 OS=Cricetulus griseus GN=I79_010919 PE=4 SV=1	CRIGR	19
	122	74	38.5	38.5	43	33.95	29.37	tr|G3I1H0|G3I1H0_CRIGR	DNA replication licensing factor MCM3 OS=Cricetulus griseus GN=I79_017225 PE=3 SV=1	CRIGR	19
	123	79	37.55	37.55	48.75	46.62	41.99	tr|G3GTB7|G3GTB7_CRIGR	Heterogeneous nuclear ribonucleoprotein Q OS=Cricetulus griseus GN=I79_000895 PE=4 SV=1	CRIGR	19
	124	82	36.83	36.83	57.59	54.43	52.32	tr|G3HN88|G3HN88_CRIGR	Adenylyl cyclase-associated protein OS=Cricetulus griseus GN=I79_012224 PE=3 SV=1	CRIGR	19
	125	83	36.29	36.29	52.79	49.19	44.5	tr|G3GYY6|G3GYY6_CRIGR	Catalase OS=Cricetulus griseus GN=I79_003036 PE=3 SV=1	CRIGR	19
	126	89	35.61	35.61	86.35	82.66	76.38	tr|G3HA23|G3HA23_CRIGR	Malate dehydrogenase (Fragment) OS=Cricetulus griseus GN=I79_007263 PE=4 SV=1	CRIGR	19
	127	90	35.49	35.49	50.59	45	45	tr|G3IGL0|G3IGL0_CRIGR	Putative heterogeneous nuclear ribonucleoprotein A1-like protein 3 OS=Cricetulus griseus GN=I79_022927 PE=4 SV=1	CRIGR	19
	128	92	35.17	35.17	75.62	71.6	66.98	tr|G3I220|G3I220_CRIGR	Cytoskeleton-associated protein 4 OS=Cricetulus griseus GN=I79_017443 PE=4 SV=1	CRIGR	19
	129	97	33.53	33.53	18.29	11.46	10.7	tr|G3GXT2|G3GXT2_CRIGR	CAD protein OS=Cricetulus griseus GN=I79_002575 PE=3 SV=1	CRIGR	19
	130	98	33.37	35.45	32.92	24.21	21.74	tr|G3GU10|G3GU10_CRIGR	Monofunctional C1-tetrahydrofolate synthase, mitochondrial OS=Cricetulus griseus GN=I79_001156 PE=3 SV=1	CRIGR	19
	131	107	32.16	32.16	40.48	31.12	31.12	tr|G3HDT6|G3HDT6_CRIGR	Histone H2A OS=Cricetulus griseus GN=I79_008702 PE=3 SV=1	CRIGR	19
	132	111	31.84	31.84	53.76	51.55	51.55	tr|G3I7M2|G3I7M2_CRIGR	Elongation factor Tu OS=Cricetulus griseus GN=I79_019515 PE=3 SV=1	CRIGR	19
	133	180	23.73	23.73	78.66	67.07	63.41	sp|P14851|PPIA_CRIGR	Peptidyl-prolyl cis-trans isomerase A OS=Cricetulus griseus GN=PPIA PE=2 SV=2	CRIGR	19
	134	969	4.03	33.19	53.01	50.3	50.3	tr|G3H354|G3H354_CRIGR	Heat shock protein HSP 90-alpha OS=Cricetulus griseus GN=I79_004665 PE=4 SV=1	CRIGR	19
	135	1487	0	38.58	53.13	48.66	44.78	tr|G3I0H2|G3I0H2_CRIGR	40S ribosomal protein S4 OS=Cricetulus griseus GN=I79_016857 PE=3 SV=1	CRIGR	19
	136	1568	1.26	18.77	57.36	57.36	53.3	tr|G3I1S5|G3I1S5_CRIGR	Glyceraldehyde-3-phosphate dehydrogenase OS=Cricetulus griseus GN=I79_017344 PE=3 SV=1	CRIGR	19
	137	92	35.17	35.17	75.62	71.6	66.98	tr|G3I220|G3I220_CRIGR	Cytoskeleton-associated protein 4 OS=Cricetulus griseus GN=I79_017443 PE=4 SV=1	CRIGR	19
	138	70	39.64	39.64	66.6	59.5	50.1	tr|G3GZR1|G3GZR1_CRIGR	Aspartyl-tRNA synthetase, cytoplasmic OS=Cricetulus griseus GN=I79_003356 PE=3 SV=1	CRIGR	18
	139	84	36.28	36.28	48.96	37.01	33.06	tr|G3I2I1|G3I2I1_CRIGR	DNA replication licensing factor MCM4 OS=Cricetulus griseus GN=I79_017612 PE=3 SV=1	CRIGR	18
	140	109	31.92	31.92	61.22	54.15	47.07	tr|G3HE31|G3HE31_CRIGR	26S protease regulatory subunit 7 OS=Cricetulus griseus GN=I79_008802 PE=4 SV=1	CRIGR	18
	141	110	31.9	31.9	53.66	44.77	38.68	tr|G3I5Q4|G3I5Q4_CRIGR	Heterogeneous nuclear ribonucleoprotein M OS=Cricetulus griseus GN=I79_018809 PE=4 SV=1	CRIGR	18
	142	116	31.01	31.01	67.42	59.85	56.82	tr|G3HKG8|G3HKG8_CRIGR	40S ribosomal protein S3a OS=Cricetulus griseus GN=Rps3a PE=3 SV=1	CRIGR	18
	143	123	29.41	29.41	49.25	49.25	45.23	tr|G3HPV7|G3HPV7_CRIGR	Histone H4 OS=Cricetulus griseus GN=I79_012828 PE=3 SV=1	CRIGR	18
	144	131	28.33	28.33	36.02	34.15	33.96	tr|G3HP75|G3HP75_CRIGR	D-3-phosphoglycerate dehydrogenase OS=Cricetulus griseus GN=I79_012581 PE=3 SV=1	CRIGR	18
	145	133	28.07	28.07	69.68	56.56	56.11	tr|G3I3Y6|G3I3Y6_CRIGR	Glutathione S-transferase P OS=Cricetulus griseus GN=I79_018157 PE=3 SV=1	CRIGR	18
	146	91	35.21	35.21	19.36	12.2	9.648	tr|G3IAS8|G3IAS8_CRIGR	Kinesin-like protein KIF27 OS=Cricetulus griseus GN=I79_020709 PE=3 SV=1	CRIGR	17
	147	94	34.74	34.74	62.2	56.94	55.98	tr|G3GZE6|G3GZE6_CRIGR	Actin-related protein 3 OS=Cricetulus griseus GN=I79_003209 PE=3 SV=1	CRIGR	17
	148	100	33.24	33.24	48.14	32.92	30.27	tr|G3I8S7|G3I8S7_CRIGR	Polyadenylate-binding protein 1 OS=Cricetulus griseus GN=I79_019955 PE=4 SV=1	CRIGR	17
	149	101	32.93	32.93	51.62	47.45	41.67	tr|G3HAN8|G3HAN8_CRIGR	Adenosylhomocysteinase OS=Cricetulus griseus GN=I79_007494 PE=3 SV=1	CRIGR	17
	150	103	32.65	32.65	53.07	51.75	51.75	tr|G3I3F3|G3I3F3_CRIGR	Ribonuclease inhibitor OS=Cricetulus griseus GN=I79_017958 PE=4 SV=1	CRIGR	17
	151	104	32.6	32.6	49.88	41.94	36.97	tr|G3I2I9|G3I2I9_CRIGR	60S ribosomal protein L3 OS=Cricetulus griseus GN=I79_017622 PE=3 SV=1	CRIGR	17
	152	106	32.41	32.41	49.29	45.05	43.46	tr|G3H3G9|G3H3G9_CRIGR	Septin-9 OS=Cricetulus griseus GN=I79_004785 PE=3 SV=1	CRIGR	17
	153	113	31.52	31.52	54.45	45.13	34.37	tr|G3IHY5|G3IHY5_CRIGR	6-phosphogluconate dehydrogenase, decarboxylating OS=Cricetulus griseus GN=I79_023445 PE=3 SV=1	CRIGR	17
	154	117	30.58	32.6	27.59	19.67	19.67	tr|G3HXL6|G3HXL6_CRIGR	Annexin OS=Cricetulus griseus GN=I79_015744 PE=3 SV=1	CRIGR	17
	155	127	29.11	29.11	70.83	63.89	60.65	tr|G3H533|G3H533_CRIGR	Peptidyl-prolyl cis-trans isomerase OS=Cricetulus griseus GN=I79_005402 PE=3 SV=1	CRIGR	17
	156	129	28.73	28.73	69.31	66.06	61.73	tr|Q924V2|Q924V2_CRIGR	Carbonyl reductase 2 OS=Cricetulus griseus GN=CHCR2 PE=2 SV=1	CRIGR	17
	157	134	27.94	27.94	38.01	34.08	34.08	tr|G3GWM0|G3GWM0_CRIGR	Eukaryotic peptide chain release factor GTP-binding subunit ERF3B OS=Cricetulus griseus GN=I79_002147 PE=4 SV=1	CRIGR	17
	158	139	27.09	27.09	54.95	43.63	41.75	tr|G3I0C8|G3I0C8_CRIGR	Acetyl-CoA acetyltransferase, mitochondrial OS=Cricetulus griseus GN=I79_016807 PE=3 SV=1	CRIGR	17
	159	151	26.12	28.15	70.4	70.4	65.11	tr|G3H4V1|G3H4V1_CRIGR	Septin-2 OS=Cricetulus griseus GN=I79_005314 PE=3 SV=1	CRIGR	17
	160	155	25.79	25.79	66.29	65.45	63.2	tr|G3HXL1|G3HXL1_CRIGR	Poly(RC)-binding protein 1 OS=Cricetulus griseus GN=I79_015737 PE=4 SV=1	CRIGR	17
	161	180	0	21.66	75	63.41	59.76	tr|G3HIQ1|G3HIQ1_CRIGR	Peptidyl-prolyl cis-trans isomerase OS=Cricetulus griseus GN=I79_010526 PE=3 SV=1	CRIGR	17
	162	226	20.05	26.01	53.06	43.27	43.27	tr|G3IEY9|G3IEY9_CRIGR	14-3-3 protein theta OS=Cricetulus griseus GN=I79_022299 PE=3 SV=1	CRIGR	17
	163	566	9.07	28.94	35.42	28.06	25.69	tr|G3HWJ2|G3HWJ2_CRIGR	Plectin-1 OS=Cricetulus griseus GN=I79_015375 PE=4 SV=1	CRIGR	17
	164	101	32.93	32.93	51.62	47.45	41.67	tr|G3HAN8|G3HAN8_CRIGR	Adenosylhomocysteinase OS=Cricetulus griseus GN=I79_007494 PE=3 SV=1	CRIGR	17
	165	112	31.58	31.69	56.03	51.06	51.06	tr|G3HCU8|G3HCU8_CRIGR	26S protease regulatory subunit 8 OS=Cricetulus griseus GN=I79_008315 PE=4 SV=1	CRIGR	16
	166	114	31.48	33.56	38.67	37.68	33.85	tr|G3I027|G3I027_CRIGR	Heat shock protein 75 kDa, mitochondrial OS=Cricetulus griseus GN=I79_016693 PE=3 SV=1	CRIGR	16
	167	119	30.35	30.35	20.26	13.69	12.84	tr|G3HQI8|G3HQI8_CRIGR	Myosin-Vb OS=Cricetulus griseus GN=I79_013090 PE=3 SV=1	CRIGR	16
	168	121	29.99	29.99	38.57	31.63	31.63	tr|G3GW11|G3GW11_CRIGR	Non-specific lipid-transfer protein OS=Cricetulus griseus GN=I79_001919 PE=4 SV=1	CRIGR	16
	169	126	29.14	30.8	49.46	40.05	28.75	tr|G3IAI5|G3IAI5_CRIGR	DNA replication licensing factor MCM5 OS=Cricetulus griseus GN=I79_020608 PE=3 SV=1	CRIGR	16
	170	132	28.12	28.12	13.73	10.88	9.82	tr|G3H5V0|G3H5V0_CRIGR	Importin subunit beta-1 OS=Cricetulus griseus GN=I79_005692 PE=4 SV=1	CRIGR	16
	171	138	27.54	27.54	60.3	55.57	49.16	tr|G3HLK3|G3HLK3_CRIGR	Granulins OS=Cricetulus griseus GN=I79_011593 PE=4 SV=1	CRIGR	16
	172	201	21.77	21.77	50.6	43.41	41.02	tr|G3HDQ2|G3HDQ2_CRIGR	Malate dehydrogenase OS=Cricetulus griseus GN=I79_008638 PE=3 SV=1	CRIGR	16
	173	390	13.82	13.82	54.07	54.07	54.07	tr|G3I4Z7|G3I4Z7_CRIGR	Galectin OS=Cricetulus griseus GN=I79_018538 PE=4 SV=1	CRIGR	16
	174	390	0	13.82	54.07	54.07	54.07	sp|P48538|LEG1_CRIGR	Galectin-1 OS=Cricetulus griseus GN=LGALS1 PE=1 SV=2	CRIGR	16
	175	812	5.74	28.54	47.17	43.4	43.4	tr|G3HDU1|G3HDU1_CRIGR	Putative uncharacterized protein OS=Cricetulus griseus GN=I79_008707 PE=3 SV=1	CRIGR	16
	176	1485	1.74	26.53	56.32	55.23	50.9	tr|Q924V3|Q924V3_CRIGR	Carbonyl reductase 1 OS=Cricetulus griseus GN=CHCR1 PE=2 SV=2	CRIGR	16
	177	99	33.25	33.25	27.85	20.31	16.62	tr|G3HKQ7|G3HKQ7_CRIGR	Microtubule-associated protein OS=Cricetulus griseus GN=I79_011286 PE=4 SV=1	CRIGR	15
	178	102	32.68	32.68	32.27	26.52	23.65	tr|G3H7V9|G3H7V9_CRIGR	DNA replication licensing factor MCM2 OS=Cricetulus griseus GN=I79_006453 PE=3 SV=1	CRIGR	15
	179	108	32.08	32.08	42.65	35.95	31.88	tr|G3HSM3|G3HSM3_CRIGR	Thimet oligopeptidase OS=Cricetulus griseus GN=I79_013857 PE=3 SV=1	CRIGR	15
	180	115	31.26	31.26	44.13	32.9	28.39	tr|G3IB71|G3IB71_CRIGR	Glutaminyl-tRNA synthetase OS=Cricetulus griseus GN=I79_020861 PE=3 SV=1	CRIGR	15
	181	124	29.32	29.32	34.32	25.74	24.79	tr|G3I064|G3I064_CRIGR	Neutral alpha-glucosidase AB OS=Cricetulus griseus GN=I79_016741 PE=4 SV=1	CRIGR	15
	182	130	28.35	28.35	41.05	39.88	36.38	sp|P12269|IMDH2_CRIGR	Inosine-5'-monophosphate dehydrogenase 2 OS=Cricetulus griseus GN=IMPDH2 PE=1 SV=1	CRIGR	15
	183	136	27.87	27.87	50.95	50.11	45.26	tr|G3I692|G3I692_CRIGR	Cytosolic non-specific dipeptidase OS=Cricetulus griseus GN=I79_019004 PE=4 SV=1	CRIGR	15
	184	137	27.62	27.62	42.86	35.28	35.28	tr|G3HQQ9|G3HQQ9_CRIGR	ATP-binding cassette sub-family F member 1 OS=Cricetulus griseus GN=I79_013165 PE=3 SV=1	CRIGR	15
	185	140	27.07	27.07	45.23	29.65	28.14	sp|P37880|SYRC_CRIGR	Arginine--tRNA ligase, cytoplasmic OS=Cricetulus griseus GN=RARS PE=2 SV=1	CRIGR	15
	186	141	27.03	30.1	67.24	55.97	47.1	tr|G3HYJ9|G3HYJ9_CRIGR	Moesin OS=Cricetulus griseus GN=I79_016134 PE=4 SV=1	CRIGR	15
	187	143	26.85	26.85	65.22	59.78	59.78	tr|G3HK00|G3HK00_CRIGR	Guanine nucleotide-binding protein subunit beta-2-like 1 OS=Cricetulus griseus GN=I79_011006 PE=4 SV=1	CRIGR	15
	188	146	26.59	26.59	43.9	27.56	24.39	tr|G3HJS1|G3HJS1_CRIGR	Spectrin beta chain, brain 1 OS=Cricetulus griseus GN=I79_010920 PE=4 SV=1	CRIGR	15
	189	150	26.26	26.26	71.52	66.34	66.34	tr|G3H9Z4|G3H9Z4_CRIGR	Serine-threonine kinase receptor-associated protein OS=Cricetulus griseus GN=I79_007227 PE=4 SV=1	CRIGR	15
	190	153	25.99	27.03	46.49	38.02	34.5	tr|G3I3Z5|G3I3Z5_CRIGR	Coronin OS=Cricetulus griseus GN=I79_018166 PE=3 SV=1	CRIGR	15
	191	156	25.76	25.76	49.55	44.55	44.55	tr|G3GWG3|G3GWG3_CRIGR	High mobility group protein B1 OS=Cricetulus griseus GN=I79_002087 PE=4 SV=1	CRIGR	15
	192	159	25.18	25.18	42.62	38.72	38.44	tr|G3GY75|G3GY75_CRIGR	Eukaryotic initiation factor 4A-I OS=Cricetulus griseus GN=I79_002748 PE=4 SV=1	CRIGR	15
	193	166	24.75	24.75	47.67	43.01	38.14	tr|G3HQ45|G3HQ45_CRIGR	Eukaryotic translation initiation factor 2 subunit 3 OS=Cricetulus griseus GN=I79_012939 PE=4 SV=1	CRIGR	15
	194	172	24.09	24.18	76.25	68.97	66.28	tr|G3H412|G3H412_CRIGR	Proliferating cell nuclear antigen OS=Cricetulus griseus GN=I79_005005 PE=3 SV=1	CRIGR	15
	195	172	0	24.18	76.25	68.97	66.28	sp|P57761|PCNA_CRIGR	Proliferating cell nuclear antigen OS=Cricetulus griseus GN=PCNA PE=1 SV=1	CRIGR	15
	196	183	23.17	23.17	81.41	79.4	79.4	tr|G3H7Z2|G3H7Z2_CRIGR	Transgelin-2 OS=Cricetulus griseus GN=I79_006488 PE=4 SV=1	CRIGR	15
	197	194	22.19	22.19	15.73	13.93	13.93	tr|G3H4X0|G3H4X0_CRIGR	LanC-like protein 1 (Fragment) OS=Cricetulus griseus GN=I79_005333 PE=3 SV=1	CRIGR	15
	198	203	21.5	21.5	47.14	45.36	42.86	tr|G3IBF1|G3IBF1_CRIGR	Nucleophosmin OS=Cricetulus griseus GN=I79_020971 PE=4 SV=1	CRIGR	15
	199	355	14.86	23.09	59.02	48.36	48.36	tr|G3HLS2|G3HLS2_CRIGR	14-3-3 protein beta/alpha OS=Cricetulus griseus GN=I79_011666 PE=3 SV=1	CRIGR	15
	200	558	9.25	20.74	30.73	24.02	24.02	tr|G3HZE5|G3HZE5_CRIGR	Heat shock 70 kDa protein 1A OS=Cricetulus griseus GN=I79_016446 PE=3 SV=1	CRIGR	15
	201	940	0	21.55	55	48.89	48.33	sp|P07156|HMGB1_CRIGR	High mobility group protein B1 (Fragment) OS=Cricetulus griseus GN=HMGB1 PE=1 SV=1	CRIGR	15
	202	143	26.85	26.85	65.22	59.78	59.78	tr|G3HK00|G3HK00_CRIGR	Guanine nucleotide-binding protein subunit beta-2-like 1 OS=Cricetulus griseus GN=I79_011006 PE=4 SV=1	CRIGR	15
	203	118	30.51	30.51	40.24	31.86	27.66	tr|G3GUP7|G3GUP7_CRIGR	Ubiquitin carboxyl-terminal hydrolase OS=Cricetulus griseus GN=I79_001414 PE=3 SV=1	CRIGR	14
	204	120	30.26	30.27	26.67	14.72	12.08	tr|G3I306|G3I306_CRIGR	Eukaryotic translation initiation factor 4 gamma 1 OS=Cricetulus griseus GN=I79_017805 PE=4 SV=1	CRIGR	14
	205	122	29.73	29.73	36.01	28.64	26.13	sp|P37879|SYK_CRIGR	Lysine--tRNA ligase OS=Cricetulus griseus GN=KARS PE=1 SV=1	CRIGR	14
	206	122	0	29.71	34.35	27.32	24.92	tr|G3I4N3|G3I4N3_CRIGR	Lysine--tRNA ligase OS=Cricetulus griseus GN=I79_018416 PE=3 SV=1	CRIGR	14
	207	125	29.25	29.25	74.6	66.67	52.38	tr|G3H1M4|G3H1M4_CRIGR	Eukaryotic translation initiation factor 2 subunit 1 OS=Cricetulus griseus GN=I79_004073 PE=4 SV=1	CRIGR	14
	208	128	29.04	29.04	38.82	38.19	30.17	tr|G3HI96|G3HI96_CRIGR	Coronin OS=Cricetulus griseus GN=I79_010363 PE=3 SV=1	CRIGR	14
	209	135	27.88	27.88	50.6	41.47	39.48	tr|G3HW36|G3HW36_CRIGR	Serine hydroxymethyltransferase OS=Cricetulus griseus GN=I79_015184 PE=3 SV=1	CRIGR	14
	210	145	26.8	26.8	43.63	41.57	39.51	tr|G3HRN0|G3HRN0_CRIGR	ATP synthase subunit beta OS=Cricetulus griseus GN=I79_013474 PE=3 SV=1	CRIGR	14
	211	149	26.27	26.27	28.85	26.65	22.38	tr|G3H8Z9|G3H8Z9_CRIGR	Sodium/potassium-transporting ATPase subunit alpha-1 OS=Cricetulus griseus GN=I79_006860 PE=3 SV=1	CRIGR	14
	212	152	26.05	26.05	43.72	40.23	40.23	tr|G3I2Y1|G3I2Y1_CRIGR	Aspartate aminotransferase OS=Cricetulus griseus GN=I79_017779 PE=3 SV=1	CRIGR	14
	213	161	25.15	25.15	46.91	39.36	34.32	tr|G3IC99|G3IC99_CRIGR	Septin-11 OS=Cricetulus griseus GN=I79_021290 PE=3 SV=1	CRIGR	14
	214	163	24.96	24.96	26.29	16.27	12.82	tr|G3HAF4|G3HAF4_CRIGR	Splicing factor 3B subunit 3 OS=Cricetulus griseus GN=I79_007403 PE=4 SV=1	CRIGR	14
	215	168	24.44	25.23	62.97	54.43	49.37	tr|G3IE21|G3IE21_CRIGR	Aldose reductase-related protein 2 OS=Cricetulus griseus GN=I79_021963 PE=4 SV=1	CRIGR	14
	216	168	0	25.23	62.97	54.43	49.37	sp|O08782|ALD2_CRIGR	Aldose reductase-related protein 2 OS=Cricetulus griseus GN=AKR1B8 PE=1 SV=3	CRIGR	14
	217	181	23.7	23.7	48.48	39.06	39.06	tr|G3HNJ6|G3HNJ6_CRIGR	60S ribosomal protein L5 OS=Cricetulus griseus GN=I79_012334 PE=3 SV=1	CRIGR	14
	218	185	22.89	22.89	14.01	8.28	6.744	tr|G3GZQ9|G3GZQ9_CRIGR	Lactase-phlorizin hydrolase OS=Cricetulus griseus GN=I79_003354 PE=3 SV=1	CRIGR	14
	219	218	20.31	20.31	49.81	42.86	40.54	tr|G3HB04|G3HB04_CRIGR	Protein disulfide-isomerase A6 OS=Cricetulus griseus GN=I79_007616 PE=4 SV=1	CRIGR	14
	220	261	18.18	18.18	57.69	57.69	52.4	tr|G3GYR9|G3GYR9_CRIGR	40S ribosomal protein S8 OS=Cricetulus griseus GN=I79_002981 PE=3 SV=1	CRIGR	14
	221	988	4	20.86	69.02	59.78	51.63	tr|G3GXA9|G3GXA9_CRIGR	Protein disulfide-isomerase OS=Cricetulus griseus GN=I79_002399 PE=3 SV=1	CRIGR	14
	222	142	26.9	26.9	39.08	30.99	26.26	tr|G3HXU0|G3HXU0_CRIGR	Tubulin--tyrosine ligase-like protein 12 OS=Cricetulus griseus GN=I79_015854 PE=4 SV=1	CRIGR	13
	223	144	26.81	26.81	46.31	32.18	27.09	tr|G3HID0|G3HID0_CRIGR	Dolichyl-diphosphooligosaccharide--protein glycosyltransferase subunit 1 OS=Cricetulus griseus GN=I79_010390 PE=4 SV=1	CRIGR	13
	224	147	26.42	26.42	51.06	44.71	38.36	tr|G3IEG2|G3IEG2_CRIGR	Serpin B6 OS=Cricetulus griseus GN=I79_022109 PE=3 SV=1	CRIGR	13
	225	148	26.36	26.36	41.3	35.75	31.88	tr|G3HU51|G3HU51_CRIGR	Isocitrate dehydrogenase [NADP] OS=Cricetulus griseus GN=I79_014456 PE=3 SV=1	NADP	13
	226	154	25.87	25.87	57.39	54.78	51.74	tr|G3GT06|G3GT06_CRIGR	T-complex protein 1 subunit theta OS=Cricetulus griseus GN=I79_000779 PE=4 SV=1	CRIGR	13
	227	157	25.53	25.53	56.13	46.44	39.32	tr|G3GWB3|G3GWB3_CRIGR	Alpha-2-macroglobulin receptor-associated protein OS=Cricetulus griseus GN=I79_002033 PE=4 SV=1	CRIGR	13
	228	158	25.22	25.22	42.96	41.58	41.58	tr|G3GU30|G3GU30_CRIGR	60S ribosomal protein L6 OS=Cricetulus griseus GN=I79_001178 PE=3 SV=1	CRIGR	13
	229	167	24.44	25.34	44.24	41.74	39.25	tr|G3I5A4|G3I5A4_CRIGR	Annexin OS=Cricetulus griseus GN=I79_018648 PE=3 SV=1	CRIGR	13
	230	169	24.25	24.25	52.55	44.28	40.88	tr|G3GUI3|G3GUI3_CRIGR	FK506-binding protein 4 OS=Cricetulus griseus GN=I79_001345 PE=4 SV=1	CRIGR	13
	231	175	23.89	23.89	34.55	29.09	27.82	tr|G3HQ69|G3HQ69_CRIGR	Src substrate cortactin OS=Cricetulus griseus GN=I79_012963 PE=4 SV=1	CRIGR	13
	232	177	23.82	23.82	32.05	31.75	29.38	tr|G3I3G8|G3I3G8_CRIGR	Transaldolase OS=Cricetulus griseus GN=I79_017974 PE=3 SV=1	CRIGR	13
	233	178	23.79	23.79	59.7	55.51	52.85	tr|G3HSE4|G3HSE4_CRIGR	Proteasome subunit alpha type OS=Cricetulus griseus GN=I79_013775 PE=3 SV=1	CRIGR	13
	234	179	23.77	23.77	73.8	73.8	73.8	tr|G3GU60|G3GU60_CRIGR	Phosphatidylethanolamine-binding protein 1 OS=Cricetulus griseus GN=I79_001211 PE=4 SV=1	CRIGR	13
	235	186	22.88	22.88	61.39	61.39	60.13	tr|G3I004|G3I004_CRIGR	40S ribosomal protein S11 OS=Cricetulus griseus GN=I79_016673 PE=3 SV=1	CRIGR	13
	236	191	22.38	22.38	23.94	19.01	15.29	tr|G3GWE9|G3GWE9_CRIGR	Solute carrier family 2, facilitated glucose transporter member 9 OS=Cricetulus griseus GN=I79_002071 PE=3 SV=1	CRIGR	13
	237	205	21.16	21.16	87.05	75.54	70.5	tr|G3I952|G3I952_CRIGR	EF-hand domain-containing protein D2 OS=Cricetulus griseus GN=I79_020086 PE=4 SV=1	CRIGR	13
	238	208	20.95	20.95	38.83	36.17	34.85	tr|G3HF46|G3HF46_CRIGR	Polypyrimidine tract-binding protein 1 OS=Cricetulus griseus GN=I79_009199 PE=4 SV=1	CRIGR	13
	239	231	19.73	19.91	19.3	8.592	6.477	tr|G3I3A8|G3I3A8_CRIGR	Nuclear mitotic apparatus protein 1 OS=Cricetulus griseus GN=I79_017912 PE=4 SV=1	CRIGR	13
	240	232	19.68	19.68	20.16	14.44	12.98	tr|G3GRK8|G3GRK8_CRIGR	E3 ubiquitin-protein ligase NEDD4 OS=Cricetulus griseus GN=I79_000157 PE=4 SV=1	CRIGR	13
	241	237	19.32	19.32	50.82	47.21	47.21	tr|G3HPZ5|G3HPZ5_CRIGR	Macrophage-capping protein OS=Cricetulus griseus GN=I79_012882 PE=4 SV=1	CRIGR	13
	242	286	17.01	18.54	51.01	51.01	51.01	tr|G3HCW9|G3HCW9_CRIGR	Peroxiredoxin-2 OS=Cricetulus griseus GN=I79_008337 PE=4 SV=1	CRIGR	13
	243	286	0	18.54	51.01	51.01	51.01	sp|Q8K3U7|PRDX2_CRIGR	Peroxiredoxin-2 OS=Cricetulus griseus GN=PRDX2 PE=2 SV=3	CRIGR	13
	244	517	10.18	14.85	32.19	25.31	20.94	tr|G3HHM2|G3HHM2_CRIGR	Histone H3.1t OS=Cricetulus griseus GN=I79_010126 PE=3 SV=1	CRIGR	13
	245	558	0	18.68	28.86	20.28	20.28	tr|G3HZE6|G3HZE6_CRIGR	Heat shock 70 kDa protein 1A/1B OS=Cricetulus griseus GN=I79_016447 PE=3 SV=1	CRIGR	13
	246	987	4	21.52	39.8	30.71	30.47	tr|G3HYG2|G3HYG2_CRIGR	Eukaryotic initiation factor 4A-II OS=Cricetulus griseus GN=I79_016095 PE=4 SV=1	CRIGR	13
	247	158	0.01	22.08	9.098	4.01	4.01	tr|G3H278|G3H278_CRIGR	60S ribosomal protein L6 OS=Cricetulus griseus GN=I79_004246 PE=3 SV=1	CRIGR	12
	248	160	25.15	25.15	30.17	19.66	18.02	sp|Q9Z1E9|GSLG1_CRIGR	Golgi apparatus protein 1 OS=Cricetulus griseus GN=GLG1 PE=1 SV=1	CRIGR	12
	249	164	24.95	24.95	24.72	19.43	17.44	tr|G3H239|G3H239_CRIGR	Sarcoplasmic/endoplasmic reticulum calcium ATPase 2 OS=Cricetulus griseus GN=I79_004283 PE=3 SV=1	CRIGR	12
	250	171	24.14	24.14	27.25	22.8	18.07	sp|Q9R152|PARP1_CRIGR	Poly [ADP-ribose] polymerase 1 OS=Cricetulus griseus GN=PARP1 PE=2 SV=3	CRIGR	12
	251	171	0	24.14	27.09	23.79	18.85	tr|G3HV73|G3HV73_CRIGR	Poly [ADP-ribose] polymerase 1 OS=Cricetulus griseus GN=I79_014850 PE=4 SV=1	ADP-ribose	12
	252	174	23.91	23.91	43.88	38.85	38.85	tr|G3HD97|G3HD97_CRIGR	Thioredoxin domain-containing protein 5 OS=Cricetulus griseus GN=I79_008476 PE=3 SV=1	CRIGR	12
	253	182	23.36	23.36	39.81	33.89	32.46	tr|G3H289|G3H289_CRIGR	Aldehyde dehydrogenase, mitochondrial OS=Cricetulus griseus GN=I79_004260 PE=3 SV=1	CRIGR	12
	254	184	23	23	33.91	30.64	24.1	tr|G3HLV1|G3HLV1_CRIGR	FK506-binding protein 10 OS=Cricetulus griseus GN=I79_011695 PE=4 SV=1	CRIGR	12
	255	187	22.86	22.86	41.16	35.11	33.17	tr|G3GZZ0|G3GZZ0_CRIGR	Aspartate aminotransferase OS=Cricetulus griseus GN=I79_003438 PE=3 SV=1	CRIGR	12
	256	193	22.28	22.28	71.57	68.14	61.76	tr|G3GXB0|G3GXB0_CRIGR	Rho GDP-dissociation inhibitor 1 OS=Cricetulus griseus GN=I79_002400 PE=4 SV=1	CRIGR	12
	257	195	22.11	22.11	50.55	33.06	33.06	tr|G3H0B5|G3H0B5_CRIGR	Isocitrate dehydrogenase [NAD] subunit alpha, mitochondrial OS=Cricetulus griseus GN=I79_003570 PE=3 SV=1	NAD	12
	258	196	22.07	22.07	68.54	63.48	63.48	tr|G3GZW8|G3GZW8_CRIGR	Phosphoglycerate mutase 1 OS=Cricetulus griseus GN=I79_003415 PE=3 SV=1	CRIGR	12
	259	197	22.03	22.03	63.42	57.59	48.64	tr|G3IN18|G3IN18_CRIGR	60S ribosomal protein L8 OS=Cricetulus griseus GN=I79_025329 PE=3 SV=1	CRIGR	12
	260	199	21.94	21.94	43.88	37.42	34.74	tr|G3H605|G3H605_CRIGR	Heterogeneous nuclear ribonucleoprotein H2 OS=Cricetulus griseus GN=I79_005755 PE=4 SV=1	CRIGR	12
	261	202	21.71	23.8	39.29	35.77	34.01	tr|G3HDR3|G3HDR3_CRIGR	T-complex protein 1 subunit delta OS=Cricetulus griseus GN=I79_008649 PE=4 SV=1	CRIGR	12
	262	207	21.02	21.02	50	44.09	42.47	tr|G3I390|G3I390_CRIGR	Actin-related protein 2/3 complex subunit 1B OS=Cricetulus griseus GN=I79_017891 PE=4 SV=1	CRIGR	12
	263	211	20.62	20.62	36.74	27.31	27.31	tr|G3I277|G3I277_CRIGR	Dihydrolipoyl dehydrogenase OS=Cricetulus griseus GN=I79_017504 PE=3 SV=1	CRIGR	12
	264	211	0	20.56	33.79	27.31	27.31	sp|Q8CIZ7|DLDH_CRIGR	Dihydrolipoyl dehydrogenase, mitochondrial OS=Cricetulus griseus GN=DLD PE=2 SV=1	CRIGR	12
	265	212	20.57	20.57	48.22	47.25	44.66	tr|G3IKH9|G3IKH9_CRIGR	Phosphoserine aminotransferase OS=Cricetulus griseus GN=I79_024382 PE=3 SV=1	CRIGR	12
	266	213	20.55	20.55	31.46	30.4	26.44	tr|G3HX84|G3HX84_CRIGR	Gelsolin OS=Cricetulus griseus GN=I79_015603 PE=4 SV=1	CRIGR	12
	267	217	20.32	20.32	52.66	48.52	48.52	tr|G3H638|G3H638_CRIGR	Activator of 90 kDa heat shock protein ATPase-like 1 OS=Cricetulus griseus GN=I79_005789 PE=4 SV=1	CRIGR	12
	268	228	20	20	49.83	49.83	49.83	sp|P38982|RSSA_CRIGR	40S ribosomal protein SA OS=Cricetulus griseus GN=Rpsa PE=1 SV=3	CRIGR	12
	269	252	18.41	18.41	33.98	28.32	26.76	tr|G3ILI3|G3ILI3_CRIGR	Seryl-tRNA synthetase, cytoplasmic OS=Cricetulus griseus GN=I79_024749 PE=4 SV=1	CRIGR	12
	270	255	18.33	18.33	43.72	43.72	43.72	tr|G3HT18|G3HT18_CRIGR	Nucleosome assembly protein 1-like 1 OS=Cricetulus griseus GN=I79_014020 PE=3 SV=1	CRIGR	12
	271	309	16.23	21.87	50	45.04	42.2	tr|G3H2J8|G3H2J8_CRIGR	Heterogeneous nuclear ribonucleoproteins A2/B1 OS=Cricetulus griseus GN=I79_004411 PE=4 SV=1	CRIGR	12
	272	331	15.69	17.91	66.17	63.68	56.22	tr|G3I2E9|G3I2E9_CRIGR	Ras-related protein Rab-1B OS=Cricetulus griseus GN=I79_017591 PE=3 SV=1	CRIGR	12
	273	348	15.05	24.29	43.32	31.3	26.15	tr|G3HN77|G3HN77_CRIGR	Polyadenylate-binding protein 4 OS=Cricetulus griseus GN=I79_012213 PE=4 SV=1	CRIGR	12
	274	545	9.55	23.42	30.81	21.33	19.59	tr|G3HIP2|G3HIP2_CRIGR	Heterogeneous nuclear ribonucleoprotein R OS=Cricetulus griseus GN=I79_010517 PE=4 SV=1	CRIGR	12
	275	1100	3.17	13.11	53.17	53.17	47.62	tr|G3INX0|G3INX0_CRIGR	Histone H2B OS=Cricetulus griseus GN=I79_025665 PE=3 SV=1	CRIGR	12
	276	1100	0	13.11	53.17	53.17	47.62	tr|G3IB92|G3IB92_CRIGR	Histone H2B OS=Cricetulus griseus GN=I79_020906 PE=3 SV=1	CRIGR	12
	277	1100	0	13.11	53.17	53.17	47.62	tr|G3HPV1|G3HPV1_CRIGR	Histone H2B OS=Cricetulus griseus GN=I79_012822 PE=3 SV=1	CRIGR	12
	278	1100	0	13.11	53.17	53.17	47.62	tr|G3HDU3|G3HDU3_CRIGR	Histone H2B OS=Cricetulus griseus GN=I79_008709 PE=3 SV=1	CRIGR	12
	279	1100	0	13.11	53.17	53.17	47.62	tr|G3HDT7|G3HDT7_CRIGR	Histone H2B OS=Cricetulus griseus GN=I79_008688 PE=3 SV=1	CRIGR	12
	280	1100	0	13.11	48.2	48.2	43.17	tr|G3HDT0|G3HDT0_CRIGR	Histone H2B OS=Cricetulus griseus GN=I79_008696 PE=3 SV=1	CRIGR	12
	281	1100	0	13.11	53.17	53.17	47.62	tr|G3H2U0|G3H2U0_CRIGR	Histone H2B OS=Cricetulus griseus GN=I79_004542 PE=3 SV=1	CRIGR	12
	282	1100	0	13.11	53.17	53.17	47.62	tr|G3H2T4|G3H2T4_CRIGR	Histone H2B OS=Cricetulus griseus GN=I79_004536 PE=3 SV=1	CRIGR	12
	283	1568	0	12.61	40.54	40.54	34.36	tr|G3GZ97|G3GZ97_CRIGR	Glyceraldehyde-3-phosphate dehydrogenase OS=Cricetulus griseus GN=I79_003157 PE=3 SV=1	CRIGR	12
	284	2612	0.07	16.92	28.55	17.94	16.07	tr|G3HZE7|G3HZE7_CRIGR	Heat shock 70 kDa protein 1L OS=Cricetulus griseus GN=I79_016448 PE=3 SV=1	CRIGR	12
	285	165	24.82	24.82	25.49	11	7.417	tr|G3GVX1|G3GVX1_CRIGR	Ribosome-binding protein 1 OS=Cricetulus griseus GN=I79_001876 PE=4 SV=1	CRIGR	11
	286	170	24.19	24.19	29.74	22.72	13.68	tr|G3II69|G3II69_CRIGR	DNA damage-binding protein 1 OS=Cricetulus griseus GN=I79_023537 PE=4 SV=1	CRIGR	11
	287	173	23.97	23.97	54.95	48.46	43.34	tr|G3HBP8|G3HBP8_CRIGR	40S ribosomal protein S2 OS=Cricetulus griseus GN=I79_007954 PE=3 SV=1	CRIGR	11
	288	176	23.85	23.85	41.89	33.33	27.85	tr|G3HCS4|G3HCS4_CRIGR	26S proteasome non-ATPase regulatory subunit 12 OS=Cricetulus griseus GN=I79_008289 PE=4 SV=1	CRIGR	11
	289	188	22.84	22.84	28.37	15.69	12.12	tr|G3HP24|G3HP24_CRIGR	Isoleucyl-tRNA synthetase, cytoplasmic OS=Cricetulus griseus GN=I79_012527 PE=3 SV=1	CRIGR	11
	290	190	22.42	22.42	38.27	38.27	25.38	tr|G3HMY0|G3HMY0_CRIGR	Hydroxymethylglutaryl-CoA synthase, cytoplasmic OS=Cricetulus griseus GN=I79_012110 PE=4 SV=1	CRIGR	11
	291	190	0	22.42	38.27	38.27	25.38	sp|P13704|HMCS1_CRIGR	Hydroxymethylglutaryl-CoA synthase, cytoplasmic OS=Cricetulus griseus GN=HMGCS1 PE=3 SV=1	CRIGR	11
	292	192	22.3	22.3	23.33	20.39	16.8	tr|G3I7J6|G3I7J6_CRIGR	Non-POU domain-containing octamer-binding protein OS=Cricetulus griseus GN=I79_019488 PE=4 SV=1	CRIGR	11
	293	204	21.42	21.42	19.83	11.87	9.117	sp|P06213|INSR_HUMAN	Insulin receptor OS=Homo sapiens GN=INSR PE=1 SV=4	HUMAN	11
	294	206	21.13	21.13	42.42	42.42	39.39	tr|G3ILN5|G3ILN5_CRIGR	Reticulocalbin-3 OS=Cricetulus griseus GN=I79_024805 PE=4 SV=1	CRIGR	11
	295	209	20.89	20.89	41.65	29.98	25.93	tr|G3H066|G3H066_CRIGR	V-type proton ATPase catalytic subunit A OS=Cricetulus griseus GN=I79_003541 PE=3 SV=1	CRIGR	11
	296	219	20.25	21.85	34.7	30.05	23.43	tr|G3H2C4|G3H2C4_CRIGR	Heat shock 70 kDa protein 4 (Fragment) OS=Cricetulus griseus GN=I79_004332 PE=4 SV=1	CRIGR	11
	297	220	20.25	20.25	31.28	28.62	23.63	tr|G3H2G5|G3H2G5_CRIGR	Serine/threonine-protein phosphatase 2A 65 kDa regulatory subunit A beta isoform OS=Cricetulus griseus GN=I79_004378 PE=4 SV=1	CRIGR	11
	298	222	20.2	20.2	63.08	58.77	49.54	tr|G3H945|G3H945_CRIGR	Eukaryotic translation initiation factor 3 subunit I OS=Cricetulus griseus GN=Eif3i PE=3 SV=1	CRIGR	11
	299	224	20.18	20.18	35.33	28.57	23.36	tr|G3HZY1|G3HZY1_CRIGR	RuvB-like 2 OS=Cricetulus griseus GN=I79_016646 PE=4 SV=1	CRIGR	11
	300	225	20.08	20.08	45.48	41.27	39.76	tr|G3I5H3|G3I5H3_CRIGR	Elongation factor 1-delta OS=Cricetulus griseus GN=I79_018721 PE=3 SV=1	CRIGR	11
	301	228	0	18	65.92	65.92	65.92	tr|G3HQX0|G3HQX0_CRIGR	40S ribosomal protein SA OS=Cricetulus griseus GN=I79_013226 PE=3 SV=1	CRIGR	11
	302	234	19.47	19.47	36.64	33.08	29.35	tr|G3I2Q7|G3I2Q7_CRIGR	Transcription intermediary factor 1-beta OS=Cricetulus griseus GN=I79_017700 PE=4 SV=1	CRIGR	11
	303	238	19.27	20.67	43.78	40.19	38.28	tr|G3HKD6|G3HKD6_CRIGR	Histone-binding protein RBBP7 OS=Cricetulus griseus GN=I79_011156 PE=4 SV=1	CRIGR	11
	304	240	19.2	19.2	41.42	32.72	32.72	tr|G3H6C5|G3H6C5_CRIGR	Hsp90 co-chaperone Cdc37 OS=Cricetulus griseus GN=I79_005880 PE=4 SV=1	CRIGR	11
	305	247	18.78	18.85	31.57	25.07	22.36	tr|G3I2H0|G3I2H0_CRIGR	Dipeptidyl-peptidase 3 OS=Cricetulus griseus GN=I79_017576 PE=4 SV=1	CRIGR	11
	306	248	18.68	18.82	28.05	20.58	19	tr|G3GZ90|G3GZ90_CRIGR	Calumenin OS=Cricetulus griseus GN=I79_003123 PE=4 SV=1	CRIGR	11
	307	254	18.37	18.37	70.9	70.9	66.14	tr|G3IEU2|G3IEU2_CRIGR	Protein DJ-1 OS=Cricetulus griseus GN=I79_022246 PE=4 SV=1	CRIGR	11
	308	256	18.28	18.28	25.04	24.03	22.84	tr|G3HP69|G3HP69_CRIGR	Calnexin OS=Cricetulus griseus GN=I79_012575 PE=3 SV=1	CRIGR	11
	309	274	17.6	17.6	31.93	22.35	20.5	tr|G3HB62|G3HB62_CRIGR	ATP-binding cassette sub-family F member 2 OS=Cricetulus griseus GN=I79_007683 PE=3 SV=1	CRIGR	11
	310	281	17.31	17.31	54.5	54.5	41.23	sp|Q9Z313|RL13_CRIGR	60S ribosomal protein L13 OS=Cricetulus griseus GN=RPL13 PE=2 SV=3	CRIGR	11
	311	281	0	17.13	53.61	53.61	44.85	tr|G3GRR8|G3GRR8_CRIGR	60S ribosomal protein L13 OS=Cricetulus griseus GN=I79_000212 PE=3 SV=1	CRIGR	11
	312	282	17.29	17.29	63.44	60.79	48.9	tr|G3H5W5|G3H5W5_CRIGR	LIM and SH3 domain protein 1 OS=Cricetulus griseus GN=I79_005710 PE=4 SV=1	CRIGR	11
	313	293	16.71	16.71	85.09	85.09	85.09	tr|G3I1P5|G3I1P5_CRIGR	SH3 domain-binding glutamic acid-rich-like protein OS=Cricetulus griseus GN=I79_017308 PE=3 SV=1	CRIGR	11
	314	297	16.61	18.21	73.33	72.73	72.73	tr|G3GVX2|G3GVX2_CRIGR	Destrin OS=Cricetulus griseus GN=I79_001877 PE=4 SV=1	CRIGR	11
	315	308	16.25	16.25	33.25	28.13	28.13	tr|G3HLX0|G3HLX0_CRIGR	Polymerase I and transcript release factor OS=Cricetulus griseus GN=I79_011714 PE=4 SV=1	CRIGR	11
	316	344	15.25	15.25	30.72	30.72	30.07	tr|G3I948|G3I948_CRIGR	Eukaryotic translation initiation factor 5A-2 OS=Cricetulus griseus GN=I79_020082 PE=4 SV=1	CRIGR	11
	317	481	11.01	17.37	41.53	27.97	27.97	tr|G3HK90|G3HK90_CRIGR	14-3-3 protein eta OS=Cricetulus griseus GN=I79_011108 PE=3 SV=1	CRIGR	11
	318	1049	3.63	19.96	43.78	37.77	35.19	tr|G3IJ43|G3IJ43_CRIGR	Pyruvate kinase OS=Cricetulus griseus GN=I79_023874 PE=3 SV=1	CRIGR	11
	319	1139	2.84	18.26	40.82	32.21	29.59	tr|G3H2T7|G3H2T7_CRIGR	Histone H3 OS=Cricetulus griseus GN=I79_004539 PE=3 SV=1	CRIGR	11
	320	188	22.84	22.84	28.37	15.69	12.12	tr|G3HP24|G3HP24_CRIGR	Isoleucyl-tRNA synthetase, cytoplasmic OS=Cricetulus griseus GN=I79_012527 PE=3 SV=1	CRIGR	11
	321	209	20.89	20.89	41.65	29.98	25.93	tr|G3H066|G3H066_CRIGR	V-type proton ATPase catalytic subunit A OS=Cricetulus griseus GN=I79_003541 PE=3 SV=1	CRIGR	11
	322	173	0	21.9	52.22	45.73	40.61	tr|Q6TMK7|Q6TMK7_CRIGR	Ribosomal protein Rps2 OS=Cricetulus griseus PE=2 SV=1	CRIGR	10
	323	189	22.69	22.69	43.44	30.92	23.68	tr|G3I5S7|G3I5S7_CRIGR	Coatomer subunit delta OS=Cricetulus griseus GN=I79_018833 PE=4 SV=1	CRIGR	10
	324	200	21.82	21.82	55.67	50.35	45.39	tr|G3HYP6|G3HYP6_CRIGR	Nuclear migration protein nudC OS=Cricetulus griseus GN=I79_016187 PE=4 SV=1	CRIGR	10
	325	210	20.89	20.89	22.66	21.22	18.53	tr|G3H697|G3H697_CRIGR	Glucosidase 2 subunit beta OS=Cricetulus griseus GN=I79_005851 PE=4 SV=1	CRIGR	10
	326	214	20.46	20.46	52.15	45.43	39.25	tr|G3H6Y6|G3H6Y6_CRIGR	NSFL1 cofactor p47 OS=Cricetulus griseus GN=I79_006110 PE=4 SV=1	CRIGR	10
	327	216	20.32	20.32	71.16	66.98	61.86	tr|G3HX83|G3HX83_CRIGR	Ras-related protein Rab-14 OS=Cricetulus griseus GN=I79_015602 PE=3 SV=1	CRIGR	10
	328	221	20.22	20.22	21.95	13.11	8.596	tr|G3I278|G3I278_CRIGR	Laminin subunit beta-1 OS=Cricetulus griseus GN=I79_017505 PE=4 SV=1	CRIGR	10
	329	227	20.04	20.04	31.26	24.2	24.2	tr|Q4PNY4|Q4PNY4_CRIGR	Fumarate hydratase OS=Cricetulus griseus PE=2 SV=1	CRIGR	10
	330	227	0	20.04	28.8	22.29	22.29	tr|G3H6M5|G3H6M5_CRIGR	Fumarate hydratase, mitochondrial OS=Cricetulus griseus GN=I79_005991 PE=3 SV=1	CRIGR	10
	331	229	19.88	19.88	37.45	21.81	18.11	tr|G3H6U1|G3H6U1_CRIGR	Nucleolar RNA helicase 2 OS=Cricetulus griseus GN=I79_006060 PE=4 SV=1	CRIGR	10
	332	235	19.37	19.37	33.29	24.37	24.37	tr|G3IJ02|G3IJ02_CRIGR	Leucine-rich repeat flightless-interacting protein 1 OS=Cricetulus griseus GN=I79_023832 PE=4 SV=1	CRIGR	10
	333	236	19.36	19.36	29.52	22.7	18.57	sp|O88818|PLST_CRIGR	Plastin-3 OS=Cricetulus griseus GN=PLS3 PE=2 SV=3	CRIGR	10
	334	241	19.18	19.18	41.58	32.45	32.45	tr|G3IJ29|G3IJ29_CRIGR	Eukaryotic translation initiation factor 3 subunit D OS=Cricetulus griseus GN=Eif3d PE=3 SV=1	CRIGR	10
	335	253	18.38	18.38	35.84	33.87	26.7	sp|P50309|G6PI_CRIGR	Glucose-6-phosphate isomerase OS=Cricetulus griseus GN=GPI PE=2 SV=1	CRIGR	10
	336	256	0	16.99	22	20.98	19.8	tr|Q8K3H8|Q8K3H8_CRIGR	Calnexin OS=Cricetulus griseus PE=2 SV=1	CRIGR	10
	337	257	18.26	18.26	55.12	55.12	50.73	tr|G3GT05|G3GT05_CRIGR	T-complex protein 1 subunit theta OS=Cricetulus griseus GN=I79_000778 PE=3 SV=1	CRIGR	10
	338	264	18.04	20.1	29.82	24.65	22.86	tr|G3HHA9|G3HHA9_CRIGR	Annexin OS=Cricetulus griseus GN=I79_010006 PE=3 SV=1	CRIGR	10
	339	272	17.65	17.65	37.24	24.76	21.93	tr|G3HBI9|G3HBI9_CRIGR	Leukotriene A-4 hydrolase OS=Cricetulus griseus GN=I79_007819 PE=4 SV=1	CRIGR	10
	340	273	17.64	17.64	28.7	24	22.26	tr|G3I6H5|G3I6H5_CRIGR	Fermitin family-like 2 OS=Cricetulus griseus GN=I79_019099 PE=4 SV=1	CRIGR	10
	341	276	17.45	17.45	31.12	24.1	22.2	tr|Q9ERF7|Q9ERF7_CRIGR	Intercellular adhesion molecule 1 OS=Cricetulus griseus GN=ICAM1 PE=2 SV=1	CRIGR	10
	342	279	17.36	17.36	41.08	37.68	30.88	tr|G3IHC7|G3IHC7_CRIGR	Protein arginine N-methyltransferase 1 OS=Cricetulus griseus GN=I79_023216 PE=4 SV=1	CRIGR	10
	343	284	17.12	17.12	21.05	17.67	16.42	tr|G3HZ55|G3HZ55_CRIGR	Integrin beta OS=Cricetulus griseus GN=I79_016350 PE=3 SV=1	CRIGR	10
	344	292	16.74	16.74	43.05	43.05	42.38	sp|P62265|RS14_CRIGR	40S ribosomal protein S14 OS=Cricetulus griseus GN=RPS14 PE=2 SV=3	CRIGR	10
	345	299	16.54	16.54	82.61	82.61	82.61	tr|G3I3H2|G3I3H2_CRIGR	60S acidic ribosomal protein P2 OS=Cricetulus griseus GN=I79_017979 PE=3 SV=1	CRIGR	10
	346	300	16.52	16.52	50.37	46.64	44.4	tr|G3HE84|G3HE84_CRIGR	Microtubule-associated protein RP/EB family member 1 OS=Cricetulus griseus GN=I79_008861 PE=4 SV=1	CRIGR	10
	347	302	16.44	16.44	73.24	70.42	64.79	tr|G3H928|G3H928_CRIGR	Adenylate kinase 2, mitochondrial OS=Cricetulus griseus GN=I79_006890 PE=3 SV=1	CRIGR	10
	348	303	16.37	18.47	54.63	42.9	39.2	tr|G3GYP7|G3GYP7_CRIGR	Alcohol dehydrogenase [NADP+] OS=Cricetulus griseus GN=I79_002952 PE=4 SV=1	NADP+	10
	349	304	16.37	16.37	65.9	65.9	57.09	tr|G3H7U0|G3H7U0_CRIGR	3-hydroxyacyl-CoA dehydrogenase type-2 OS=Cricetulus griseus GN=I79_006433 PE=3 SV=1	CRIGR	10
	350	310	16.23	16.25	54.33	48.82	48.82	tr|G3IEE6|G3IEE6_CRIGR	Spermidine synthase OS=Cricetulus griseus GN=I79_022093 PE=3 SV=1	CRIGR	10
	351	314	16.04	18.19	48.59	39.27	38.7	tr|G3HTJ2|G3HTJ2_CRIGR	Septin-7 (Fragment) OS=Cricetulus griseus GN=I79_014218 PE=3 SV=1	CRIGR	10
	352	316	16.02	16.02	40.93	30.8	23.84	tr|G3HAP7|G3HAP7_CRIGR	Glutathione synthetase OS=Cricetulus griseus GN=I79_007504 PE=4 SV=1	CRIGR	10
	353	318	16	16	37.18	30.34	30.34	tr|G3I073|G3I073_CRIGR	Elongation factor 1-gamma OS=Cricetulus griseus GN=I79_016750 PE=4 SV=1	CRIGR	10
	354	319	16	16	62.81	62.81	62.81	tr|G3I737|G3I737_CRIGR	40S ribosomal protein S12 OS=Cricetulus griseus GN=I79_019322 PE=3 SV=1	CRIGR	10
	355	326	15.86	17.6	44.5	33.5	30.32	tr|G3HNP6|G3HNP6_CRIGR	26S protease regulatory subunit 6B (Fragment) OS=Cricetulus griseus GN=I79_012389 PE=4 SV=1	CRIGR	10
	356	328	15.82	15.82	76.92	76.92	76.92	tr|G3IDD9|G3IDD9_CRIGR	40S ribosomal protein S3 OS=Cricetulus griseus GN=I79_021716 PE=3 SV=1	CRIGR	10
	357	335	15.53	16.94	33.47	32.03	32.03	tr|G3IE04|G3IE04_CRIGR	Pre-mRNA-processing factor 19 OS=Cricetulus griseus GN=I79_021945 PE=4 SV=1	CRIGR	10
	358	337	15.51	15.51	51.63	48.69	46.41	tr|Q9EPP7|Q9EPP7_CRIGR	Cathepsin Z OS=Cricetulus griseus GN=ctsz PE=2 SV=1	CRIGR	10
	359	418	12.63	14.66	62.91	62.91	58.28	tr|G3HRQ4|G3HRQ4_CRIGR	Myosin light polypeptide 6 OS=Cricetulus griseus GN=I79_013501 PE=4 SV=1	CRIGR	10
	360	436	12.05	15.97	61.97	55.13	47.86	tr|G3HJB1|G3HJB1_CRIGR	Alpha-actinin-4 OS=Cricetulus griseus GN=I79_010753 PE=4 SV=1	CRIGR	10
	361	892	4.73	15.77	44.65	38.84	35.47	tr|G3HJB0|G3HJB0_CRIGR	Alpha-actinin-4 (Fragment) OS=Cricetulus griseus GN=I79_010752 PE=4 SV=1	CRIGR	10
	362	989	4	19.88	44.34	37.35	34.46	tr|G3HP71|G3HP71_CRIGR	Heterogeneous nuclear ribonucleoprotein H (Fragment) OS=Cricetulus griseus GN=I79_012577 PE=4 SV=1	CRIGR	10
	363	1100	0	9.62	41.27	41.27	35.71	tr|G3HJY9|G3HJY9_CRIGR	Histone H2B type 1 OS=Cricetulus griseus GN=I79_010992 PE=3 SV=1	CRIGR	10
	364	1485	0	17.97	40.66	35.68	35.68	tr|G3IF40|G3IF40_CRIGR	Carbonyl reductase [NADPH] 1 OS=Cricetulus griseus GN=I79_022353 PE=3 SV=1	NADPH	10
	365	303	16.37	18.47	54.63	42.9	39.2	tr|G3GYP7|G3GYP7_CRIGR	Alcohol dehydrogenase [NADP+] OS=Cricetulus griseus GN=I79_002952 PE=4 SV=1	NADP+	10
	366	335	15.53	16.94	33.47	32.03	32.03	tr|G3IE04|G3IE04_CRIGR	Pre-mRNA-processing factor 19 OS=Cricetulus griseus GN=I79_021945 PE=4 SV=1	CRIGR	10
	367	215	20.42	20.42	46.53	40.42	28.63	tr|G3HIX6|G3HIX6_CRIGR	Tryptophanyl-tRNA synthetase, cytoplasmic OS=Cricetulus griseus GN=I79_010607 PE=3 SV=1	CRIGR	9
	368	230	19.76	19.76	26.84	25.09	20.18	tr|G3HMQ0|G3HMQ0_CRIGR	FK506-binding protein 9 OS=Cricetulus griseus GN=I79_012022 PE=4 SV=1	CRIGR	9
	369	233	19.49	19.49	19.39	17.6	15.49	tr|G3HTE5|G3HTE5_CRIGR	Lysosomal alpha-glucosidase OS=Cricetulus griseus GN=I79_014170 PE=4 SV=1	CRIGR	9
	370	235	0	17.32	35.3	21.94	21.94	tr|O88679|O88679_CRIGR	TRIP protein (Fragment) OS=Cricetulus griseus GN=trip PE=2 SV=1	CRIGR	9
	371	239	19.23	19.23	30.96	22.15	18.51	tr|G3IIE7|G3IIE7_CRIGR	Procollagen-lysine,2-oxoglutarate 5-dioxygenase 1 OS=Cricetulus griseus GN=I79_023615 PE=4 SV=1	CRIGR	9
	372	242	19.17	19.17	42.54	35.36	29.83	tr|M1R372|M1R372_CRIGR	Phosphoribosylaminoimidazole carboxylase/phosphoribosylaminoimidazole succinocarboxamide synthetase OS=Cricetulus griseus GN=PAICS PE=2 SV=1	CRIGR	9
	373	242	0.02	18.65	38.35	27.53	25.41	tr|M1RNR0|M1RNR0_CRIGR	Phosphoribosylaminoimidazole carboxylase/phosphoribosylaminoimidazole succinocarboxamide synthetase OS=Cricetulus griseus GN=PAICS PE=2 SV=1	CRIGR	9
	374	242	0.02	18.65	38.35	27.53	25.41	tr|M1R995|M1R995_CRIGR	Phosphoribosylaminoimidazole carboxylase/ phosphoribosylaminoimidazole succinocarboxamide synthetase OS=Cricetulus griseus GN=PAICS PE=2 SV=1	CRIGR	9
	375	243	19.12	19.12	58.87	47.87	40.43	tr|G3INU6|G3INU6_CRIGR	UDP-glucose 6-dehydrogenase OS=Cricetulus griseus GN=I79_025636 PE=3 SV=1	CRIGR	9
	376	244	19.07	19.07	44.91	37.04	33.8	tr|G3IHE5|G3IHE5_CRIGR	GTP-binding nuclear protein Ran OS=Cricetulus griseus GN=I79_023234 PE=4 SV=1	CRIGR	9
	377	245	18.99	18.99	34.37	21.8	15.34	tr|G3H2N6|G3H2N6_CRIGR	Programmed cell death 6-interacting protein OS=Cricetulus griseus GN=I79_004454 PE=4 SV=1	CRIGR	9
	378	246	18.82	18.82	29.65	26.62	25.11	tr|G3HR08|G3HR08_CRIGR	Cytosol aminopeptidase OS=Cricetulus griseus GN=I79_013268 PE=3 SV=1	CRIGR	9
	379	250	18.64	18.65	61.86	61.86	61.86	tr|G3I9X6|G3I9X6_CRIGR	Spectrin alpha chain, brain OS=Cricetulus griseus GN=I79_020387 PE=4 SV=1	CRIGR	9
	380	251	18.5	18.5	44.67	40.16	37.3	tr|G3I0X4|G3I0X4_CRIGR	Epoxide hydrolase 1 OS=Cricetulus griseus GN=I79_017016 PE=4 SV=1	CRIGR	9
	381	258	18.23	18.23	35.38	25.11	20.21	tr|G3IFX1|G3IFX1_CRIGR	Succinate dehydrogenase [ubiquinone] flavoprotein subunit, mitochondrial OS=Cricetulus griseus GN=I79_022646 PE=4 SV=1	CRIGR	9
	382	259	18.23	18.23	19.42	19.42	16.37	tr|G3IMX9|G3IMX9_CRIGR	von Willebrand factor A domain-containing protein 5A OS=Cricetulus griseus GN=I79_025284 PE=4 SV=1	CRIGR	9
	383	262	18.06	18.06	43.41	40.68	28.18	tr|G3HGV7|G3HGV7_CRIGR	tRNA-splicing ligase RtcB homolog OS=Cricetulus griseus GN=Rtcb PE=3 SV=1	CRIGR	9
	384	263	18.06	18.06	54.84	42.74	42.74	tr|F7J0L2|F7J0L2_CRIGR	Splicing factor, arginine/serine-rich 1 (Fragment) OS=Cricetulus griseus GN=Srsf1 PE=2 SV=1	CRIGR	9
	385	265	18	18.78	44.83	34.87	34.87	tr|G3H1U2|G3H1U2_CRIGR	Heterogeneous nuclear ribonucleoprotein A3 OS=Cricetulus griseus GN=I79_004125 PE=4 SV=1	CRIGR	9
	386	266	17.93	17.93	22.87	14.48	13.41	tr|G3GYY2|G3GYY2_CRIGR	Caprin-1 OS=Cricetulus griseus GN=I79_003032 PE=4 SV=1	CRIGR	9
	387	267	17.84	17.84	57.74	48.68	48.68	tr|G3GYK8|G3GYK8_CRIGR	26S protease regulatory subunit 6A OS=Cricetulus griseus GN=I79_002888 PE=4 SV=1	CRIGR	9
	388	268	17.82	17.82	41.75	32.04	23.88	tr|G4Y369|G4Y369_CRIGR	Glucose-6-phosphate 1-dehydrogenase OS=Cricetulus griseus GN=G6PDH PE=2 SV=1	CRIGR	9
	389	268	0	17.82	41.75	32.04	23.88	sp|O55044|G6PD_CRIGR	Glucose-6-phosphate 1-dehydrogenase OS=Cricetulus griseus GN=G6PD PE=2 SV=3	CRIGR	9
	390	269	17.82	17.82	41.31	41.31	41.31	tr|G3HM03|G3HM03_CRIGR	Synaptic vesicle membrane protein VAT-1-like OS=Cricetulus griseus GN=I79_011747 PE=4 SV=1	CRIGR	9
	391	270	17.74	17.74	30.19	21.75	19.06	tr|G3HCK9|G3HCK9_CRIGR	Far upstream element-binding protein 2 OS=Cricetulus griseus GN=I79_008220 PE=4 SV=1	CRIGR	9
	392	271	17.74	17.74	24.1	23.5	19.61	tr|G3GRB1|G3GRB1_CRIGR	Calpain-2 catalytic subunit OS=Cricetulus griseus GN=I79_000054 PE=4 SV=1	CRIGR	9
	393	277	17.4	17.4	44.97	40.53	35.8	tr|G3H8D0|G3H8D0_CRIGR	Guanine nucleotide-binding protein G(I), alpha-2 subunit OS=Cricetulus griseus GN=I79_006630 PE=4 SV=1	CRIGR	9
	394	277	0	17.38	41.13	38.59	34.08	tr|Q3HR13|Q3HR13_CRIGR	Guanine nucleotide binding protein alpha inhibiting 2 OS=Cricetulus griseus GN=GNAI2 PE=2 SV=1	CRIGR	9
	395	278	17.4	17.4	30.04	30.04	30.04	tr|G3GSB7|G3GSB7_CRIGR	60S ribosomal protein L7a OS=Cricetulus griseus GN=I79_000438 PE=4 SV=1	CRIGR	9
	396	283	17.19	17.19	44.15	38.83	38.83	tr|G3HXW9|G3HXW9_CRIGR	Alpha-centractin OS=Cricetulus griseus GN=I79_015885 PE=3 SV=1	CRIGR	9
	397	287	17	18.18	30.85	17.22	14.27	tr|G3H3P5|G3H3P5_CRIGR	Kinesin-1 heavy chain OS=Cricetulus griseus GN=I79_004874 PE=3 SV=1	CRIGR	9
	398	290	16.87	16.87	45.79	39.33	35.67	tr|G3H177|G3H177_CRIGR	Vesicular integral-membrane protein VIP36 OS=Cricetulus griseus GN=I79_003901 PE=4 SV=1	CRIGR	9
	399	291	16.85	16.85	52.11	47.89	38.03	tr|G3I6I1|G3I6I1_CRIGR	26S protease regulatory subunit S10B OS=Cricetulus griseus GN=I79_019105 PE=4 SV=1	CRIGR	9
	400	296	16.62	16.62	39.16	27.62	26.57	tr|G3H8N3|G3H8N3_CRIGR	60S ribosomal protein L4 OS=Cricetulus griseus GN=I79_006739 PE=4 SV=1	CRIGR	9
	401	298	16.59	16.59	85.51	56.52	51.21	tr|G3HID1|G3HID1_CRIGR	Ras-related protein Rab-7a OS=Cricetulus griseus GN=I79_010391 PE=3 SV=1	CRIGR	9
	402	305	16.36	16.36	36.4	27.2	25.1	tr|G3IG25|G3IG25_CRIGR	ATP-dependent RNA helicase DDX19A OS=Cricetulus griseus GN=I79_022702 PE=4 SV=1	CRIGR	9
	403	305	0	16.36	36.33	27.14	25.05	tr|G3IG24|G3IG24_CRIGR	ATP-dependent RNA helicase DDX19B OS=Cricetulus griseus GN=I79_022701 PE=4 SV=1	CRIGR	9
	404	307	16.26	16.26	56.43	44.64	36.43	tr|G3H6K9|G3H6K9_CRIGR	Four and a half LIM domains protein 1 OS=Cricetulus griseus GN=I79_005974 PE=4 SV=1	CRIGR	9
	405	311	16.1	16.1	32.15	27.09	26.84	tr|G3I5Z5|G3I5Z5_CRIGR	Prostaglandin reductase 1 OS=Cricetulus griseus GN=I79_018906 PE=4 SV=1	CRIGR	9
	406	317	16.01	16.01	74.51	61.76	61.76	tr|G3HYJ8|G3HYJ8_CRIGR	10 kDa heat shock protein, mitochondrial OS=Cricetulus griseus GN=I79_016132 PE=3 SV=1	CRIGR	9
	407	320	15.98	15.98	74.46	58.7	58.15	tr|G3GZL7|G3GZL7_CRIGR	Calcyclin-binding protein OS=Cricetulus griseus GN=I79_003304 PE=4 SV=1	CRIGR	9
	408	321	15.96	15.96	32.9	24.35	19.19	tr|G3IFE7|G3IFE7_CRIGR	Phosphoglucomutase-2 OS=Cricetulus griseus GN=I79_022469 PE=4 SV=1	CRIGR	9
	409	322	15.94	15.94	42.32	31.36	24.56	tr|G3HIC5|G3HIC5_CRIGR	RuvB-like 1 OS=Cricetulus griseus GN=I79_010385 PE=4 SV=1	CRIGR	9
	410	323	15.93	15.93	37.13	31.17	31.17	tr|Q7M0H9|Q7M0H9_CRIGR	Ca2+/calmodulin-dependent protein kinase ERK1 (Fragment) OS=Cricetulus griseus PE=4 SV=1	CRIGR	9
	411	329	15.72	15.72	30.31	23.44	23.44	tr|G3H6E1|G3H6E1_CRIGR	Eukaryotic translation initiation factor 3 subunit G OS=Cricetulus griseus GN=Eif3g PE=3 SV=1	CRIGR	9
	412	330	15.72	15.72	49.84	38.76	38.76	tr|G3IFY1|G3IFY1_CRIGR	Thymidylate synthase OS=Cricetulus griseus GN=I79_022656 PE=3 SV=1	CRIGR	9
	413	333	15.62	15.62	43.32	38.25	34.56	tr|G3H8A8|G3H8A8_CRIGR	Mesencephalic astrocyte-derived neurotrophic factor OS=Cricetulus griseus GN=I79_006608 PE=4 SV=1	CRIGR	9
	414	339	15.38	15.38	61.54	59.23	53.85	tr|G3IKE2|G3IKE2_CRIGR	40S ribosomal protein S15a OS=Cricetulus griseus GN=I79_024343 PE=3 SV=1	CRIGR	9
	415	347	15.14	15.14	50.44	41.59	37.61	tr|G3I9P1|G3I9P1_CRIGR	LDLR chaperone MESD OS=Cricetulus griseus GN=I79_020295 PE=4 SV=1	CRIGR	9
	416	350	14.98	14.98	51.35	51.35	51.35	tr|G3GVB5|G3GVB5_CRIGR	Ras-related C3 botulinum toxin substrate 1 OS=Cricetulus griseus GN=I79_001650 PE=3 SV=1	CRIGR	9
	417	354	14.87	14.87	25.87	17.98	16.88	tr|G3HJM2|G3HJM2_CRIGR	Glycyl-tRNA synthetase OS=Cricetulus griseus GN=I79_010870 PE=4 SV=1	CRIGR	9
	418	358	14.8	15.35	38.59	38.59	31.54	tr|G3HZF4|G3HZF4_CRIGR	Chloride intracellular channel protein 1 OS=Cricetulus griseus GN=I79_016455 PE=4 SV=1	CRIGR	9
	419	371	14.35	14.35	61.43	52.86	52.86	tr|G3H5W4|G3H5W4_CRIGR	60S ribosomal protein L23 OS=Cricetulus griseus GN=I79_005709 PE=3 SV=1	CRIGR	9
	420	388	13.89	13.89	46.12	46.12	46.12	tr|G3HAQ2|G3HAQ2_CRIGR	Eukaryotic translation initiation factor 6 OS=Cricetulus griseus GN=I79_007510 PE=3 SV=1	CRIGR	9
	421	409	13.27	13.27	45	39.09	39.09	tr|G3HEQ3|G3HEQ3_CRIGR	Ran-specific GTPase-activating protein OS=Cricetulus griseus GN=I79_009045 PE=4 SV=1	CRIGR	9
	422	434	12.13	12.13	45.33	44	39.33	tr|G3HNV4|G3HNV4_CRIGR	Triosephosphate isomerase OS=Cricetulus griseus GN=I79_012448 PE=3 SV=1	CRIGR	9
	423	438	12	12	67.14	57.14	57.14	tr|G3IPU3|G3IPU3_CRIGR	14-3-3 protein epsilon OS=Cricetulus griseus GN=I79_026021 PE=4 SV=1	CRIGR	9
	424	446	11.81	11.81	17.23	14.58	14.58	tr|G3I0G1|G3I0G1_CRIGR	U3 small nucleolar RNA-associated protein 15-like OS=Cricetulus griseus GN=I79_016847 PE=4 SV=1	CRIGR	9
	425	450	11.68	11.68	54.42	45.81	44.42	tr|G3I129|G3I129_CRIGR	Ubiquitin OS=Cricetulus griseus GN=I79_017072 PE=4 SV=1	CRIGR	9
	426	450	0	11.66	81.16	75.08	65.81	sp|P62976|UBIQP_CRIGR	Polyubiquitin OS=Cricetulus griseus PE=2 SV=2	CRIGR	9
	427	450	0	11.66	81.79	75.53	68.59	tr|O35080|O35080_CRIGR	Polyubiquitin OS=Cricetulus griseus GN=CHUB2 PE=4 SV=1	CRIGR	9
	428	450	0	11.66	82.62	76.41	68.96	tr|O35079|O35079_CRIGR	Polyubiquitin OS=Cricetulus griseus GN=CHUB2 PE=4 SV=1	CRIGR	9
	429	450	0	11.66	86.27	79.74	71.9	tr|G3GVL0|G3GVL0_CRIGR	Ubiquitin OS=Cricetulus griseus GN=I79_001749 PE=4 SV=1	CRIGR	9
	430	451	11.65	11.65	70.15	60.45	60.45	tr|G3HV18|G3HV18_CRIGR	60S ribosomal protein L12 OS=Cricetulus griseus GN=I79_014791 PE=3 SV=1	CRIGR	9
	431	771	0	19.07	42.13	34.26	31.02	tr|G3HP89|G3HP89_CRIGR	GTP-binding nuclear protein Ran OS=Cricetulus griseus GN=I79_012596 PE=4 SV=1	CRIGR	9
	432	940	4.19	9.94	24.36	14.75	14.52	tr|G3I180|G3I180_CRIGR	TRAF family member-associated NF-kappa-B activator OS=Cricetulus griseus GN=I79_017129 PE=4 SV=1	CRIGR	9
	433	1103	3.15	16.68	39.29	38.84	38.84	tr|G3I9S3|G3I9S3_CRIGR	60S ribosomal protein L7a OS=Cricetulus griseus GN=I79_020332 PE=4 SV=1	CRIGR	9
	434	1357	2	10.5	70.53	70.53	62.11	tr|G3GSD8|G3GSD8_CRIGR	Glyceraldehyde-3-phosphate dehydrogenase OS=Cricetulus griseus GN=I79_000461 PE=4 SV=1	CRIGR	9
	435	268	17.82	17.82	41.75	32.04	23.88	tr|G4Y369|G4Y369_CRIGR	Glucose-6-phosphate 1-dehydrogenase OS=Cricetulus griseus GN=G6PDH PE=2 SV=1	CRIGR	9
	436	268	0	17.82	41.75	32.04	23.88	sp|O55044|G6PD_CRIGR	Glucose-6-phosphate 1-dehydrogenase OS=Cricetulus griseus GN=G6PD PE=2 SV=3	CRIGR	9
	437	230	19.76	19.76	26.84	25.09	20.18	tr|G3HMQ0|G3HMQ0_CRIGR	FK506-binding protein 9 OS=Cricetulus griseus GN=I79_012022 PE=4 SV=1	CRIGR	9
	438	249	18.65	18.65	40.08	32.82	29.39	tr|G3GSK4|G3GSK4_CRIGR	Serine/threonine-protein kinase PAK 2 OS=Cricetulus griseus GN=I79_000619 PE=4 SV=1	CRIGR	8
	439	260	18.21	18.21	32.92	18.44	12.45	tr|G3GR85|G3GR85_CRIGR	Presequence protease, mitochondrial OS=Cricetulus griseus GN=I79_000028 PE=3 SV=1	CRIGR	8
	440	263	0	16.01	62.69	47.76	47.76	tr|F7J0L3|F7J0L3_CRIGR	Splicing factor, arginine/serine-rich 1, transcript variant 2 (Fragment) OS=Cricetulus griseus GN=Srsf1 PE=2 SV=1	CRIGR	8
	441	275	17.51	17.51	34.94	22.15	16.23	tr|G3HT22|G3HT22_CRIGR	Glycerol-3-phosphate dehydrogenase, mitochondrial OS=Cricetulus griseus GN=I79_014035 PE=3 SV=1	CRIGR	8
	442	280	17.33	17.33	29.71	26.02	24.66	tr|G3HPK0|G3HPK0_CRIGR	Hydroxysteroid dehydrogenase-like protein 2 OS=Cricetulus griseus GN=I79_012714 PE=4 SV=1	CRIGR	8
	443	285	17.04	17.04	41.39	30.08	24.68	tr|G3HIS0|G3HIS0_CRIGR	26S proteasome non-ATPase regulatory subunit 6 OS=Cricetulus griseus GN=I79_010547 PE=4 SV=1	CRIGR	8
	444	288	16.91	16.91	30.67	30.67	26.07	tr|G3IMD1|G3IMD1_CRIGR	Alcohol dehydrogenase class-3 OS=Cricetulus griseus GN=I79_025070 PE=3 SV=1	CRIGR	8
	445	289	16.88	16.88	24.03	10.84	9.549	tr|G3HSA2|G3HSA2_CRIGR	Myb-binding protein 1A OS=Cricetulus griseus GN=I79_013731 PE=4 SV=1	CRIGR	8
	446	301	16.46	16.46	43.52	40.93	37.82	tr|G3IDS4|G3IDS4_CRIGR	Rho-related GTP-binding protein RhoC OS=Cricetulus griseus GN=I79_021857 PE=3 SV=1	CRIGR	8
	447	306	16.36	16.36	26.66	18.85	17.32	tr|G3IBQ9|G3IBQ9_CRIGR	Phenylalanyl-tRNA synthetase beta chain OS=Cricetulus griseus GN=I79_021090 PE=4 SV=1	CRIGR	8
	448	312	16.1	16.1	44.57	44.02	44.02	tr|G3HMS8|G3HMS8_CRIGR	60S ribosomal protein L17 OS=Cricetulus griseus GN=I79_012050 PE=3 SV=1	CRIGR	8
	449	313	16.05	16.05	19.81	12.71	9.417	tr|G3GY52|G3GY52_CRIGR	Phosphoribosylformylglycinamidine synthase OS=Cricetulus griseus GN=I79_002708 PE=4 SV=1	CRIGR	8
	450	315	16.03	16.03	56.34	48.36	48.36	tr|G3I887|G3I887_CRIGR	Peroxiredoxin-5, mitochondrial OS=Cricetulus griseus GN=I79_019750 PE=4 SV=1	CRIGR	8
	451	324	15.88	15.88	42.45	29.25	27.36	tr|G3HD18|G3HD18_CRIGR	ATP-dependent RNA helicase DDX39 OS=Cricetulus griseus GN=I79_008391 PE=4 SV=1	CRIGR	8
	452	325	15.87	15.87	34.24	34.24	34.24	tr|G3I782|G3I782_CRIGR	Heterogeneous nuclear ribonucleoprotein D0 OS=Cricetulus griseus GN=I79_019367 PE=4 SV=1	CRIGR	8
	453	327	15.82	15.82	28.3	26.1	26.1	tr|G3I9Z3|G3I9Z3_CRIGR	Ribose-phosphate pyrophosphokinase 2 OS=Cricetulus griseus GN=I79_020407 PE=3 SV=1	CRIGR	8
	454	332	15.65	15.65	36.46	36.46	33.33	tr|G3ILP4|G3ILP4_CRIGR	60S ribosomal protein L9 OS=Cricetulus griseus GN=I79_024815 PE=4 SV=1	CRIGR	8
	455	332	0	15.65	35.18	35.18	32.16	tr|G3GY37|G3GY37_CRIGR	60S ribosomal protein L9 OS=Cricetulus griseus GN=I79_002692 PE=4 SV=1	CRIGR	8
	456	336	15.53	15.53	33.85	21.54	20.96	tr|G3HHF3|G3HHF3_CRIGR	Succinyl-CoA:3-ketoacid-coenzyme A transferase OS=Cricetulus griseus GN=I79_010054 PE=3 SV=1	CRIGR	8
	457	340	15.33	15.39	26.67	18.46	12.98	tr|G3I0V9|G3I0V9_CRIGR	Liprin-beta-1 OS=Cricetulus griseus GN=I79_017000 PE=4 SV=1	CRIGR	8
	458	341	15.32	17	54.6	45.68	34.82	sp|O54873|AIMP1_CRIGR	Aminoacyl tRNA synthase complex-interacting multifunctional protein 1 OS=Cricetulus griseus GN=AIMP1 PE=2 SV=1	CRIGR	8
	459	346	15.14	15.14	38.26	27.61	22.29	tr|G3HJ24|G3HJ24_CRIGR	Prolyl 4-hydroxylase subunit alpha-1 OS=Cricetulus griseus GN=I79_010658 PE=4 SV=1	CRIGR	8
	460	351	14.9	14.9	20.7	16.74	12.33	tr|G3I310|G3I310_CRIGR	26S proteasome non-ATPase regulatory subunit 2 OS=Cricetulus griseus GN=I79_017809 PE=4 SV=1	CRIGR	8
	461	352	14.89	14.89	24.8	21.37	19.53	tr|G3GWX6|G3GWX6_CRIGR	Leukocyte elastase inhibitor A OS=Cricetulus griseus GN=I79_002261 PE=3 SV=1	CRIGR	8
	462	353	14.87	15.17	35.18	26.11	20.13	tr|G3IHC0|G3IHC0_CRIGR	Isocitrate dehydrogenase [NADP] OS=Cricetulus griseus GN=I79_023209 PE=3 SV=1	NADP	8
	463	356	14.85	14.85	38.78	28.25	28.25	tr|G3GWQ3|G3GWQ3_CRIGR	Adenosine kinase OS=Cricetulus griseus GN=I79_002182 PE=4 SV=1	CRIGR	8
	464	356	0	14.85	38.78	28.25	28.25	sp|P55262|ADK_CRIGR	Adenosine kinase OS=Cricetulus griseus GN=ADK PE=1 SV=2	CRIGR	8
	465	357	14.84	14.84	57.14	55.1	55.1	tr|G3HC25|G3HC25_CRIGR	Protein S100-A13 OS=Cricetulus griseus GN=I79_008068 PE=4 SV=1	CRIGR	8
	466	359	14.77	14.77	33.39	20.03	18.36	tr|G3H9G4|G3H9G4_CRIGR	ATP-binding cassette sub-family E member 1 OS=Cricetulus griseus GN=I79_007036 PE=3 SV=1	CRIGR	8
	467	361	14.69	14.69	34.61	14.17	12.08	tr|G3I4I9|G3I4I9_CRIGR	Major vault protein OS=Cricetulus griseus GN=I79_018369 PE=4 SV=1	CRIGR	8
	468	363	14.65	14.65	19.57	14.76	13.62	tr|G3HID3|G3HID3_CRIGR	Coatomer subunit gamma OS=Cricetulus griseus GN=I79_010394 PE=3 SV=1	CRIGR	8
	469	365	14.52	14.52	38.93	33.84	33.84	sp|Q63980|MP2K1_CRIGR	Dual specificity mitogen-activated protein kinase kinase 1 OS=Cricetulus griseus GN=MAP2K1 PE=1 SV=1	CRIGR	8
	470	367	14.48	14.48	19.13	12.43	12.43	tr|G3IK13|G3IK13_CRIGR	Eukaryotic translation initiation factor 3 subunit C OS=Cricetulus griseus GN=Eif3c PE=3 SV=1	CRIGR	8
	471	368	14.44	14.44	34.18	34.18	30.8	tr|G3I230|G3I230_CRIGR	Oligoribonuclease, mitochondrial OS=Cricetulus griseus GN=I79_017454 PE=3 SV=1	CRIGR	8
	472	369	14.39	14.39	45.29	36.17	32.52	tr|G3HXY1|G3HXY1_CRIGR	PDZ and LIM domain protein 1 OS=Cricetulus griseus GN=I79_015897 PE=4 SV=1	CRIGR	8
	473	370	14.39	14.39	35.19	31.79	31.79	tr|G3I0I7|G3I0I7_CRIGR	S-methyl-5'-thioadenosine phosphorylase OS=Cricetulus griseus GN=I79_016873 PE=3 SV=1	CRIGR	8
	474	377	14.21	14.21	26.73	25.72	17.77	tr|G3HCN2|G3HCN2_CRIGR	CTP synthase OS=Cricetulus griseus GN=I79_008246 PE=3 SV=1	CRIGR	8
	475	378	14.2	14.22	46.51	40.7	37.21	tr|G3HU28|G3HU28_CRIGR	F-actin-capping protein subunit beta OS=Cricetulus griseus GN=I79_014432 PE=4 SV=1	CRIGR	8
	476	381	14.09	14.09	19.1	17.48	15.11	tr|G3GS70|G3GS70_CRIGR	Importin-5 OS=Cricetulus griseus GN=I79_000383 PE=4 SV=1	CRIGR	8
	477	382	14.05	14.05	14.45	9.58	9.58	tr|G3I7A8|G3I7A8_CRIGR	Sortilin (Fragment) OS=Cricetulus griseus GN=I79_019395 PE=4 SV=1	CRIGR	8
	478	383	14.02	14.02	67.4	61.88	51.93	tr|G3I6J4|G3I6J4_CRIGR	ADP-ribosylation factor 3 OS=Cricetulus griseus GN=I79_019118 PE=3 SV=1	CRIGR	8
	479	384	14	14	64.25	55.44	55.44	tr|G3H3I9|G3H3I9_CRIGR	Cysteine and glycine-rich protein 1 OS=Cricetulus griseus GN=I79_004837 PE=4 SV=1	CRIGR	8
	480	386	13.98	13.98	51.74	51.74	51.74	tr|G3IA94|G3IA94_CRIGR	Myosin regulatory light chain 12B OS=Cricetulus griseus GN=I79_020511 PE=4 SV=1	CRIGR	8
	481	389	13.88	13.88	33.95	25.17	21.25	tr|G3I319|G3I319_CRIGR	AP-2 complex subunit mu-1 OS=Cricetulus griseus GN=I79_017819 PE=4 SV=1	CRIGR	8
	482	394	13.73	13.73	48.13	40.25	40.25	tr|G3I873|G3I873_CRIGR	Ubiquitin thioesterase OTUB1 OS=Cricetulus griseus GN=I79_019736 PE=4 SV=1	CRIGR	8
	483	400	13.48	13.48	44.17	44.17	37.46	tr|G3I1R2|G3I1R2_CRIGR	Purine nucleoside phosphorylase (Fragment) OS=Cricetulus griseus GN=I79_017328 PE=3 SV=1	CRIGR	8
	484	402	13.41	13.41	18.28	7.441	6.479	tr|G3HG25|G3HG25_CRIGR	Laminin subunit gamma-1 OS=Cricetulus griseus GN=I79_009544 PE=4 SV=1	CRIGR	8
	485	403	13.4	13.4	40.46	32.91	32.91	tr|G3INN8|G3INN8_CRIGR	Microtubule-associated protein 6 OS=Cricetulus griseus GN=I79_025566 PE=4 SV=1	CRIGR	8
	486	405	13.38	15.43	36.12	29.07	29.07	tr|G3ILF1|G3ILF1_CRIGR	Glutathione S-transferase Mu 5 OS=Cricetulus griseus GN=I79_024715 PE=3 SV=1	CRIGR	8
	487	410	13.12	13.12	26.23	19.62	19.62	tr|G3HKN0|G3HKN0_CRIGR	Insulin-like growth factor 2 mRNA-binding protein 2 OS=Cricetulus griseus GN=I79_011259 PE=4 SV=1	CRIGR	8
	488	412	12.93	12.93	44.74	42.76	38.16	tr|G3I6W8|G3I6W8_CRIGR	40S ribosomal protein S18 OS=Cricetulus griseus GN=I79_019246 PE=3 SV=1	CRIGR	8
	489	417	12.64	13.15	53.08	53.08	45.02	tr|G3HMU4|G3HMU4_CRIGR	Chloride intracellular channel protein 4 OS=Cricetulus griseus GN=I79_012085 PE=4 SV=1	CRIGR	8
	490	421	12.47	12.47	35.54	22.55	19.85	tr|G3I4W7|G3I4W7_CRIGR	Cathepsin D OS=Cricetulus griseus GN=I79_018506 PE=3 SV=1	CRIGR	8
	491	422	12.46	14.58	26.18	21.85	20.28	tr|G3HP76|G3HP76_CRIGR	Hydroxymethylglutaryl-CoA synthase, mitochondrial OS=Cricetulus griseus GN=I79_012582 PE=4 SV=1	CRIGR	8
	492	428	12.35	12.35	26.87	20.15	20.15	sp|Q60437|BAIP2_CRIGR	Brain-specific angiogenesis inhibitor 1-associated protein 2 OS=Cricetulus griseus GN=BAIAP2 PE=1 SV=1	CRIGR	8
	493	428	0	12.32	23.06	18.92	18.92	tr|G3GX55|G3GX55_CRIGR	Brain-specific angiogenesis inhibitor 1-associated protein 2 OS=Cricetulus griseus GN=I79_002368 PE=4 SV=1	CRIGR	8
	494	449	11.7	11.7	57.02	52.89	35.54	tr|G3IMV1|G3IMV1_CRIGR	40S ribosomal protein S6 OS=Cricetulus griseus GN=I79_025249 PE=4 SV=1	CRIGR	8
	495	467	11.33	11.33	32.89	21.03	18.57	tr|G3H6W0|G3H6W0_CRIGR	V-type proton ATPase subunit B, brain isoform (Fragment) OS=Cricetulus griseus GN=I79_006080 PE=3 SV=1	CRIGR	8
	496	500	10.61	10.61	35.8	28.7	22.22	tr|G3I5V6|G3I5V6_CRIGR	Mitotic checkpoint protein BUB3 OS=Cricetulus griseus GN=I79_018864 PE=4 SV=1	CRIGR	8
	497	524	10.01	12.19	32.29	26.62	18.24	tr|G3HBG5|G3HBG5_CRIGR	26S protease regulatory subunit 4 OS=Cricetulus griseus GN=I79_007793 PE=4 SV=1	CRIGR	8
	498	623	8	14.32	26.01	19.36	19.36	tr|G3IE48|G3IE48_CRIGR	Elongation factor 1-gamma OS=Cricetulus griseus GN=I79_021990 PE=4 SV=1	CRIGR	8
	499	624	8	12	50	50	50	tr|G3HBD3|G3HBD3_CRIGR	Nucleoside diphosphate kinase OS=Cricetulus griseus GN=I79_007761 PE=3 SV=1	CRIGR	8
	500	1023	3.84	13.44	24.15	16.02	13.83	tr|G3HUM5|G3HUM5_CRIGR	SUMO-activating enzyme subunit 2 OS=Cricetulus griseus GN=I79_014638 PE=3 SV=1	CRIGR	8
	501	1030	3.8	15.68	23.27	23.27	23.27	tr|G3HD67|G3HD67_CRIGR	Ribose-phosphate pyrophosphokinase 1 OS=Cricetulus griseus GN=I79_008443 PE=3 SV=1	CRIGR	8
	502	1319	2.02	15.07	32.02	28.51	28.51	tr|G3HTQ7|G3HTQ7_CRIGR	60S ribosomal protein L7a OS=Cricetulus griseus GN=I79_014285 PE=4 SV=1	CRIGR	8
	503	1356	2	16.46	40.93	40.93	37.82	tr|G3H8F9|G3H8F9_CRIGR	Transforming protein RhoA OS=Cricetulus griseus GN=I79_006659 PE=3 SV=1	CRIGR	8
	504	367	14.48	14.48	19.13	12.43	12.43	tr|G3IK13|G3IK13_CRIGR	Eukaryotic translation initiation factor 3 subunit C OS=Cricetulus griseus GN=Eif3c PE=3 SV=1	CRIGR	8
	505	2014	0.27	10.26	20.82	17.55	15.1	tr|G3H132|G3H132_CRIGR	14-3-3 protein theta OS=Cricetulus griseus GN=I79_003855 PE=4 SV=1	CRIGR	8
	506	2130	0.19	14.21	27.08	27.08	22.74	tr|Q9JJN7|Q9JJN7_CRIGR	Carbonyl reductase OS=Cricetulus griseus GN=CHO-CR PE=2 SV=1	CRIGR	8
	507	340	15.33	15.39	26.67	18.46	12.98	tr|G3I0V9|G3I0V9_CRIGR	Liprin-beta-1 OS=Cricetulus griseus GN=I79_017000 PE=4 SV=1	CRIGR	8
	508	352	14.89	14.89	24.8	21.37	19.53	tr|G3GWX6|G3GWX6_CRIGR	Leukocyte elastase inhibitor A OS=Cricetulus griseus GN=I79_002261 PE=3 SV=1	CRIGR	8
	509	324	15.88	15.88	42.45	29.25	27.36	tr|G3HD18|G3HD18_CRIGR	ATP-dependent RNA helicase DDX39 OS=Cricetulus griseus GN=I79_008391 PE=4 SV=1	CRIGR	8
	510	357	14.84	14.84	57.14	55.1	55.1	tr|G3HC25|G3HC25_CRIGR	Protein S100-A13 OS=Cricetulus griseus GN=I79_008068 PE=4 SV=1	CRIGR	8
	511	295	16.66	16.66	59.4	45.3	35.91	tr|G3HTG9|G3HTG9_CRIGR	Glyoxalase domain-containing protein 4 OS=Cricetulus griseus GN=I79_014194 PE=4 SV=1	CRIGR	7
	512	334	15.61	15.61	23.08	17.99	10.71	tr|G3ID08|G3ID08_CRIGR	Putative pre-mRNA-splicing factor ATP-dependent RNA helicase DHX15 OS=Cricetulus griseus GN=I79_021569 PE=4 SV=1	CRIGR	7
	513	338	15.39	15.39	46.31	36.87	21.24	tr|G3H0L9|G3H0L9_CRIGR	Cathepsin B OS=Cricetulus griseus GN=I79_003681 PE=3 SV=1	CRIGR	7
	514	342	15.32	15.32	42.26	30.09	20.35	tr|C0SSX9|C0SSX9_CRIGR	Integrin-linked kinase OS=Cricetulus griseus GN=ilk PE=2 SV=1	CRIGR	7
	515	345	15.2	15.2	37.33	35.15	22.07	tr|G3GXQ4|G3GXQ4_CRIGR	Trifunctional enzyme subunit beta, mitochondrial OS=Cricetulus griseus GN=I79_002546 PE=3 SV=1	CRIGR	7
	516	349	15.03	15.03	19.24	13.85	9.197	tr|G3I710|G3I710_CRIGR	AP-2 complex subunit alpha-1 OS=Cricetulus griseus GN=I79_019291 PE=4 SV=1	CRIGR	7
	517	360	14.77	14.77	33.98	32.59	27.86	tr|G3HYG7|G3HYG7_CRIGR	DnaJ-like subfamily B member 11 OS=Cricetulus griseus GN=I79_016100 PE=4 SV=1	CRIGR	7
	518	362	14.66	14.66	15.69	10.55	9.897	tr|G3H2I6|G3H2I6_CRIGR	Neural cell adhesion molecule 1 OS=Cricetulus griseus GN=I79_004399 PE=4 SV=1	CRIGR	7
	519	364	14.54	14.54	33.66	30	28.05	tr|G3H609|G3H609_CRIGR	Glutathione reductase, mitochondrial OS=Cricetulus griseus GN=I79_005762 PE=4 SV=1	CRIGR	7
	520	366	14.5	14.5	52.6	48.7	48.7	tr|G3HFY9|G3HFY9_CRIGR	Ubiquitin-conjugating enzyme E2 L3 OS=Cricetulus griseus GN=I79_009507 PE=3 SV=1	CRIGR	7
	521	372	14.32	14.32	39.96	28.99	25.26	tr|G3I5T3|G3I5T3_CRIGR	Putative ATP-dependent RNA helicase DDX6 OS=Cricetulus griseus GN=I79_018840 PE=4 SV=1	CRIGR	7
	522	373	14.31	14.35	19.33	14.9	13.42	tr|G3H8W5|G3H8W5_CRIGR	6-phosphofructokinase OS=Cricetulus griseus GN=I79_006852 PE=3 SV=1	CRIGR	7
	523	374	14.27	14.27	19.46	6.55	4.053	tr|G3GWV9|G3GWV9_CRIGR	Nucleoprotein TPR OS=Cricetulus griseus GN=I79_002244 PE=4 SV=1	CRIGR	7
	524	375	14.27	14.27	45.78	29.22	26.81	tr|G3IKS9|G3IKS9_CRIGR	Glutaredoxin-3 OS=Cricetulus griseus GN=I79_024482 PE=4 SV=1	CRIGR	7
	525	376	14.22	14.22	26.91	22.33	17.75	tr|G3HAR7|G3HAR7_CRIGR	RNA-binding protein 39 OS=Cricetulus griseus GN=I79_007525 PE=4 SV=1	CRIGR	7
	526	379	14.19	14.19	39.41	36.18	32.35	tr|G3I1X8|G3I1X8_CRIGR	Guanine nucleotide-binding protein G(I)/G(S)/G(T) subunit beta-1 OS=Cricetulus griseus GN=I79_017392 PE=4 SV=1	CRIGR	7
	527	380	14.16	14.16	45.67	33.43	25.07	tr|G3HRR5|G3HRR5_CRIGR	ELAV-like protein 1 OS=Cricetulus griseus GN=I79_013537 PE=4 SV=1	CRIGR	7
	528	385	14	14	33.63	31.56	31.56	tr|G3HFJ1|G3HFJ1_CRIGR	Scavenger mRNA-decapping enzyme DcpS OS=Cricetulus griseus GN=I79_009349 PE=4 SV=1	CRIGR	7
	529	392	13.75	13.75	52.34	41.59	35.05	tr|G3ICW1|G3ICW1_CRIGR	Osteoclast-stimulating factor 1 OS=Cricetulus griseus GN=I79_021516 PE=4 SV=1	CRIGR	7
	530	393	13.74	13.74	59.68	59.68	59.68	tr|G3I539|G3I539_CRIGR	Hsc70-interacting protein OS=Cricetulus griseus GN=I79_018582 PE=4 SV=1	CRIGR	7
	531	395	13.71	13.71	26.59	14.27	12.33	tr|G3HIQ0|G3HIQ0_CRIGR	Threonyl-tRNA synthetase, cytoplasmic OS=Cricetulus griseus GN=I79_010525 PE=3 SV=1	CRIGR	7
	532	396	13.69	13.69	12.05	7.638	6.377	tr|G3I8H3|G3I8H3_CRIGR	Vacuolar protein sorting-associated protein 35 OS=Cricetulus griseus GN=I79_019847 PE=4 SV=1	CRIGR	7
	533	397	13.64	13.64	24.08	24.08	16.31	tr|G3HC95|G3HC95_CRIGR	tRNA (Cytosine-5-)-methyltransferase NSUN2 OS=Cricetulus griseus GN=I79_008099 PE=4 SV=1	CRIGR	7
	534	398	13.57	13.57	20.85	18.37	14.14	tr|G3GXZ0|G3GXZ0_CRIGR	Protein-glutamine gamma-glutamyltransferase 2 OS=Cricetulus griseus GN=I79_002635 PE=3 SV=1	CRIGR	7
	535	399	13.56	15.66	42.18	42.18	38.39	tr|G3H2E2|G3H2E2_CRIGR	Heterogeneous nuclear ribonucleoprotein A/B OS=Cricetulus griseus GN=I79_004352 PE=4 SV=1	CRIGR	7
	536	401	13.47	13.47	42.31	37.18	37.18	tr|G3HSF3|G3HSF3_CRIGR	Proteasome subunit alpha type OS=Cricetulus griseus GN=I79_013784 PE=3 SV=1	CRIGR	7
	537	404	13.39	13.4	39.87	36.54	36.54	tr|G3I0D8|G3I0D8_CRIGR	NADH-cytochrome b5 reductase 3 OS=Cricetulus griseus GN=I79_016819 PE=4 SV=1	CRIGR	7
	538	406	13.31	13.31	20.34	17.01	15.52	tr|G3HSE5|G3HSE5_CRIGR	Coatomer subunit beta OS=Cricetulus griseus GN=I79_013776 PE=3 SV=1	CRIGR	7
	539	407	13.31	13.31	14.36	9.973	9.241	tr|G3H0F1|G3H0F1_CRIGR	Alpha-mannosidase 2C1 OS=Cricetulus griseus GN=I79_003606 PE=4 SV=1	CRIGR	7
	540	408	13.31	13.31	49.06	38.21	38.21	tr|G3GWR8|G3GWR8_CRIGR	Proteasome subunit alpha type-7 (Fragment) OS=Cricetulus griseus GN=I79_002199 PE=4 SV=1	CRIGR	7
	541	413	12.92	12.92	45.95	36.49	36.49	tr|G3H256|G3H256_CRIGR	26S proteasome non-ATPase regulatory subunit 9 OS=Cricetulus griseus GN=I79_004301 PE=4 SV=1	CRIGR	7
	542	414	12.91	12.91	50	50	50	tr|G3HBD4|G3HBD4_CRIGR	Nucleoside diphosphate kinase OS=Cricetulus griseus GN=I79_007762 PE=3 SV=1	CRIGR	7
	543	415	12.84	12.84	48.63	35.26	35.26	tr|G3H6S8|G3H6S8_CRIGR	Inorganic pyrophosphatase OS=Cricetulus griseus GN=I79_006047 PE=4 SV=1	CRIGR	7
	544	420	12.49	12.49	26.83	24.88	21.71	tr|G3HVB8|G3HVB8_CRIGR	Platelet-activating factor acetylhydrolase IB subunit alpha OS=Cricetulus griseus GN=Pafah1b1 PE=3 SV=1	CRIGR	7
	545	423	12.41	12.41	24.92	14.33	10.59	tr|G3I2F2|G3I2F2_CRIGR	Splicing factor 3B subunit 2 OS=Cricetulus griseus GN=I79_017595 PE=4 SV=1	CRIGR	7
	546	425	12.38	12.38	37.35	18.76	17.35	tr|G3HQL6|G3HQL6_CRIGR	Thioredoxin reductase 1, cytoplasmic OS=Cricetulus griseus GN=I79_013121 PE=3 SV=1	CRIGR	7
	547	431	12.17	12.17	16.68	11.12	6.612	tr|G3H9F5|G3H9F5_CRIGR	Elongator complex protein 1 OS=Cricetulus griseus GN=I79_007024 PE=4 SV=1	CRIGR	7
	548	432	12.17	12.17	34.94	28.62	24.54	tr|G3I9G7|G3I9G7_CRIGR	Proteasome subunit alpha type OS=Cricetulus griseus GN=I79_020214 PE=3 SV=1	CRIGR	7
	549	437	12.01	12.01	36.43	26.09	18.04	tr|G3ICC2|G3ICC2_CRIGR	BAG family molecular chaperone regulator 3 OS=Cricetulus griseus GN=I79_021315 PE=4 SV=1	CRIGR	7
	550	441	11.91	11.91	28.57	22.29	22.29	tr|G3I1J6|G3I1J6_CRIGR	[Protein ADP-ribosylarginine] hydrolase OS=Cricetulus griseus GN=I79_017258 PE=4 SV=1	Protein ADP-ribosylarginine	7
	551	443	11.87	13.94	35.9	25.64	24.79	tr|G3H9U3|G3H9U3_CRIGR	Splicing factor, proline-and glutamine-rich OS=Cricetulus griseus GN=I79_007174 PE=4 SV=1	CRIGR	7
	552	444	11.86	11.87	37.64	29.89	29.15	tr|G3HR63|G3HR63_CRIGR	Protein canopy-like 3 OS=Cricetulus griseus GN=I79_013326 PE=4 SV=1	CRIGR	7
	553	445	11.81	11.81	13.26	5.339	4.335	tr|G3IFB0|G3IFB0_CRIGR	Serine/arginine repetitive matrix protein 2 OS=Cricetulus griseus GN=I79_022432 PE=4 SV=1	CRIGR	7
	554	449	0	10.15	54.47	50.41	33.33	tr|G3GWA7|G3GWA7_CRIGR	40S ribosomal protein S6 (Fragment) OS=Cricetulus griseus GN=I79_002027 PE=4 SV=1	CRIGR	7
	555	459	11.5	11.5	16.44	15.51	14.44	tr|G3HJB6|G3HJB6_CRIGR	Ras and Rab interactor-like protein OS=Cricetulus griseus GN=I79_010758 PE=4 SV=1	CRIGR	7
	556	460	11.49	11.49	31.23	31.23	26.95	tr|G3HGP4|G3HGP4_CRIGR	Acetyl-CoA acetyltransferase, cytosolic OS=Cricetulus griseus GN=I79_009782 PE=3 SV=1	CRIGR	7
	557	464	11.43	11.43	48.2	36.72	36.72	tr|G3H0B9|G3H0B9_CRIGR	WD repeat-containing protein 61 OS=Cricetulus griseus GN=I79_003574 PE=4 SV=1	CRIGR	7
	558	469	11.28	11.28	24.87	17.29	14.89	tr|G3H6Z4|G3H6Z4_CRIGR	Phosphorylase OS=Cricetulus griseus GN=I79_006118 PE=3 SV=1	CRIGR	7
	559	474	11.09	11.09	48.59	32.6	32.6	tr|G3I2N4|G3I2N4_CRIGR	Lamina-associated polypeptide 2, isoforms alpha/zeta OS=Cricetulus griseus GN=I79_017678 PE=4 SV=1	CRIGR	7
	560	478	11.05	11.05	22.14	16.1	13.08	tr|G3HH63|G3HH63_CRIGR	Phospholipase A-2-activating protein OS=Cricetulus griseus GN=I79_009960 PE=4 SV=1	CRIGR	7
	561	483	11	11	40.45	40.45	37.08	tr|G3II56|G3II56_CRIGR	Actin-related protein 2 OS=Cricetulus griseus GN=I79_023522 PE=3 SV=1	CRIGR	7
	562	487	10.93	10.93	37.33	34	26.67	tr|G3IEK1|G3IEK1_CRIGR	Actin-related protein 2/3 complex subunit 2 OS=Cricetulus griseus GN=I79_022148 PE=4 SV=1	CRIGR	7
	563	496	10.77	10.77	28.63	23.13	23.13	tr|G3H1Y8|G3H1Y8_CRIGR	Regulator of chromosome condensation OS=Cricetulus griseus GN=I79_004185 PE=4 SV=1	CRIGR	7
	564	501	10.6	10.6	20.58	13.72	13.72	tr|G3HP03|G3HP03_CRIGR	RNA-binding protein EWS OS=Cricetulus griseus GN=I79_012504 PE=4 SV=1	CRIGR	7
	565	503	10.56	10.56	65.24	52.36	36.91	tr|G3IDS2|G3IDS2_CRIGR	F-actin-capping protein subunit alpha-1 OS=Cricetulus griseus GN=I79_021855 PE=4 SV=1	CRIGR	7
	566	515	10.22	10.22	25.19	22.42	20.4	tr|Q76G10|Q76G10_CRIGR	DnaJ (Hsp40) homolog, subfamily A, member 1 (Fragment) OS=Cricetulus griseus GN=Dnaja1 PE=2 SV=1	CRIGR	7
	567	523	10.03	10.03	60.25	47.83	43.48	tr|G3HBG8|G3HBG8_CRIGR	Calmodulin OS=Cricetulus griseus GN=I79_007796 PE=4 SV=1	CRIGR	7
	568	535	9.74	9.74	22.41	20.45	17.65	tr|G3HPE9|G3HPE9_CRIGR	Echinoderm microtubule-associated protein-like 2 OS=Cricetulus griseus GN=I79_012661 PE=4 SV=1	CRIGR	7
	569	538	9.7	9.7	40.3	32.32	26.62	tr|G3GTS6|G3GTS6_CRIGR	26S proteasome non-ATPase regulatory subunit 11 OS=Cricetulus griseus GN=I79_001065 PE=4 SV=1	CRIGR	7
	570	539	9.69	9.69	43.18	35.61	32.58	tr|G3H303|G3H303_CRIGR	Proteasome subunit beta type OS=Cricetulus griseus GN=I79_004608 PE=3 SV=1	CRIGR	7
	571	549	9.45	9.45	40	37.69	32.31	tr|G3I351|G3I351_CRIGR	40S ribosomal protein S9 OS=Cricetulus griseus GN=I79_017852 PE=4 SV=1	CRIGR	7
	572	554	9.36	9.36	27.62	18.1	16.43	tr|G3IF52|G3IF52_CRIGR	Nucleobindin-2 OS=Cricetulus griseus GN=I79_022367 PE=4 SV=1	CRIGR	7
	573	562	9.13	9.13	37.26	24.33	24.33	tr|G3HAU1|G3HAU1_CRIGR	Eukaryotic translation initiation factor 3 subunit E OS=Cricetulus griseus GN=I79_007550 PE=4 SV=1	CRIGR	7
	574	595	8.33	12.24	37.99	22.94	22.94	tr|G3HTE6|G3HTE6_CRIGR	Eukaryotic initiation factor 4A-III OS=Cricetulus griseus GN=I79_014171 PE=4 SV=1	CRIGR	7
	575	670	7.35	7.35	60.82	60.82	60.82	tr|G3H571|G3H571_CRIGR	Histidine triad nucleotide-binding protein 1 OS=Cricetulus griseus GN=I79_005446 PE=4 SV=1	CRIGR	7
	576	778	6.01	12.17	27.16	22.63	19.96	tr|G3H2B7|G3H2B7_CRIGR	Septin-8 OS=Cricetulus griseus GN=I79_004325 PE=3 SV=1	CRIGR	7
	577	906	4.55	15.43	59.63	43.58	31.19	tr|G3ILF3|G3ILF3_CRIGR	Glutathione S-transferase Mu 7 OS=Cricetulus griseus GN=I79_024718 PE=3 SV=1	CRIGR	7
	578	990	4	12.62	48.44	39.84	34.38	tr|G3IKJ4|G3IKJ4_CRIGR	GTP-binding nuclear protein Ran OS=Cricetulus griseus GN=I79_024397 PE=4 SV=1	CRIGR	7
	579	1060	3.54	14.66	17.79	12.14	11.18	tr|G3IC91|G3IC91_CRIGR	von Willebrand factor A domain-containing protein 5A OS=Cricetulus griseus GN=I79_021281 PE=4 SV=1	CRIGR	7
	580	1103	0	13.26	33.8	33.33	33.33	tr|G3I0F9|G3I0F9_CRIGR	60S ribosomal protein L7a OS=Cricetulus griseus GN=I79_016844 PE=4 SV=1	CRIGR	7
	581	1262	2.13	11.95	41.25	39.38	31.25	tr|G3H018|G3H018_CRIGR	40S ribosomal protein S18 OS=Cricetulus griseus GN=I79_003466 PE=3 SV=1	CRIGR	7
	582	372	14.32	14.32	39.96	28.99	25.26	tr|G3I5T3|G3I5T3_CRIGR	Putative ATP-dependent RNA helicase DDX6 OS=Cricetulus griseus GN=I79_018840 PE=4 SV=1	CRIGR	7
	583	1931	0.35	11.83	20.22	8.889	8.222	tr|G3I4K1|G3I4K1_CRIGR	Alpha-actinin-3 OS=Cricetulus griseus GN=I79_018383 PE=4 SV=1	CRIGR	7
	584	1932	0.35	8.86	39.75	35.4	21.12	tr|G3GZ13|G3GZ13_CRIGR	Glyceraldehyde-3-phosphate dehydrogenase OS=Cricetulus griseus GN=I79_003064 PE=3 SV=1	CRIGR	7
	585	395	13.71	13.71	26.59	14.27	12.33	tr|G3HIQ0|G3HIQ0_CRIGR	Threonyl-tRNA synthetase, cytoplasmic OS=Cricetulus griseus GN=I79_010525 PE=3 SV=1	CRIGR	7
	586	374	14.27	14.27	19.46	6.55	4.053	tr|G3GWV9|G3GWV9_CRIGR	Nucleoprotein TPR OS=Cricetulus griseus GN=I79_002244 PE=4 SV=1	CRIGR	7
	587	431	12.17	12.17	16.68	11.12	6.612	tr|G3H9F5|G3H9F5_CRIGR	Elongator complex protein 1 OS=Cricetulus griseus GN=I79_007024 PE=4 SV=1	CRIGR	7
	588	342	15.32	15.32	42.26	30.09	20.35	tr|C0SSX9|C0SSX9_CRIGR	Integrin-linked kinase OS=Cricetulus griseus GN=ilk PE=2 SV=1	CRIGR	7
	589	379	0	12.17	33.53	30.29	26.47	sp|Q6TMK6|GBB1_CRIGR	Guanine nucleotide-binding protein G(I)/G(S)/G(T) subunit beta-1 OS=Cricetulus griseus GN=GNB1 PE=2 SV=3	CRIGR	6
	590	387	13.89	13.89	25.79	11.92	6.488	tr|G3H7U2|G3H7U2_CRIGR	Structural maintenance of chromosomes protein OS=Cricetulus griseus GN=I79_006435 PE=3 SV=1	CRIGR	6
	591	391	13.77	13.77	42.94	21.32	16.22	tr|G3HAN5|G3HAN5_CRIGR	Eukaryotic translation initiation factor 2 subunit 2 OS=Cricetulus griseus GN=I79_007491 PE=4 SV=1	CRIGR	6
	592	411	13.06	13.06	28.92	21.79	11.41	tr|G3H487|G3H487_CRIGR	Regulator of nonsense transcripts 1 OS=Cricetulus griseus GN=I79_005087 PE=4 SV=1	CRIGR	6
	593	416	12.82	12.82	25.31	16.2	11.73	tr|G3IDU7|G3IDU7_CRIGR	Beta-glucuronidase OS=Cricetulus griseus GN=I79_021884 PE=4 SV=1	CRIGR	6
	594	419	12.52	12.52	16.78	6.223	3.725	tr|G3I8U4|G3I8U4_CRIGR	EMILIN-2 (Fragment) OS=Cricetulus griseus GN=I79_019976 PE=4 SV=1	CRIGR	6
	595	424	12.4	12.4	39.82	25.95	19.24	tr|G3HCB0|G3HCB0_CRIGR	PC4 and SFRS1-interacting protein OS=Cricetulus griseus GN=I79_008117 PE=4 SV=1	CRIGR	6
	596	426	12.38	12.38	10.78	7.463	6.053	tr|G3GY17|G3GY17_CRIGR	Cullin-associated NEDD8-dissociated protein 1 OS=Cricetulus griseus GN=I79_002670 PE=4 SV=1	CRIGR	6
	597	427	12.36	12.36	39.38	36.25	33.13	tr|G3I018|G3I018_CRIGR	26S proteasome non-ATPase regulatory subunit 7 OS=Cricetulus griseus GN=I79_016691 PE=4 SV=1	CRIGR	6
	598	429	12.32	12.32	37.78	30.56	27.22	tr|G3H7F9|G3H7F9_CRIGR	Sialic acid synthase OS=Cricetulus griseus GN=I79_006290 PE=4 SV=1	CRIGR	6
	599	430	12.24	12.24	29.75	21.49	20.25	tr|G3HW06|G3HW06_CRIGR	Adenylosuccinate lyase OS=Cricetulus griseus GN=I79_015153 PE=4 SV=1	CRIGR	6
	600	430	0	12.24	29.75	21.49	20.25	tr|D0UZH8|D0UZH8_CRIGR	Adenylosuccinate lyase OS=Cricetulus griseus GN=ADSL PE=2 SV=1	CRIGR	6
	601	430	0	12.24	29.55	21.49	20.25	tr|D0UZH9|D0UZH9_CRIGR	Mutant adenylosuccinate lyase OS=Cricetulus griseus GN=ADSL PE=2 SV=1	CRIGR	6
	602	433	12.16	12.16	36.88	32.32	28.52	tr|G3HRD9|G3HRD9_CRIGR	Proteasome subunit beta type OS=Cricetulus griseus GN=I79_013406 PE=3 SV=1	CRIGR	6
	603	435	12.07	12.07	40.13	26.42	25.75	tr|G3GW88|G3GW88_CRIGR	Serine/threonine-protein phosphatase OS=Cricetulus griseus GN=I79_002008 PE=3 SV=1	CRIGR	6
	604	439	11.98	11.98	56.43	51.43	47.14	tr|G3HNT9|G3HNT9_CRIGR	Proteasome subunit beta type-1 OS=Cricetulus griseus GN=I79_012433 PE=4 SV=1	CRIGR	6
	605	440	11.96	11.96	22.1	18.86	15.43	tr|G3HTW7|G3HTW7_CRIGR	Signal recognition particle 68 kDa protein OS=Cricetulus griseus GN=I79_014347 PE=4 SV=1	CRIGR	6
	606	442	11.9	11.9	28.35	15.08	13.4	tr|G3H750|G3H750_CRIGR	Calpastatin OS=Cricetulus griseus GN=I79_006176 PE=4 SV=1	CRIGR	6
	607	448	11.7	11.7	30.53	24.47	21.84	tr|G3H2Z7|G3H2Z7_CRIGR	26S proteasome non-ATPase regulatory subunit 4 OS=Cricetulus griseus GN=I79_004602 PE=4 SV=1	CRIGR	6
	608	452	11.62	11.62	28.38	12.65	9.681	tr|G3H6B5|G3H6B5_CRIGR	Interleukin enhancer-binding factor 3 OS=Cricetulus griseus GN=I79_005870 PE=4 SV=1	CRIGR	6
	609	453	11.62	11.62	42.28	27.94	27.94	tr|G3GU76|G3GU76_CRIGR	60S acidic ribosomal protein P0 OS=Cricetulus griseus GN=I79_001228 PE=3 SV=1	CRIGR	6
	610	454	11.6	11.6	16.87	7.822	6.748	tr|G3HL16|G3HL16_CRIGR	Splicing factor 3B subunit 1 OS=Cricetulus griseus GN=I79_011401 PE=4 SV=1	CRIGR	6
	611	455	11.59	11.59	19.15	10.79	8.973	tr|G3H229|G3H229_CRIGR	GMP synthase [glutamine-hydrolyzing] OS=Cricetulus griseus GN=I79_004230 PE=4 SV=1	CRIGR	6
	612	456	11.57	11.57	33.49	33.49	33.49	sp|P00494|HPRT_CRIGR	Hypoxanthine-guanine phosphoribosyltransferase OS=Cricetulus griseus GN=HPRT1 PE=2 SV=2	CRIGR	6
	613	457	11.53	11.53	15.03	5.882	4.72	tr|G3H037|G3H037_CRIGR	U5 small nuclear ribonucleoprotein 200 kDa helicase OS=Cricetulus griseus GN=I79_003485 PE=4 SV=1	CRIGR	6
	614	458	11.53	11.53	10.63	10.63	9.114	tr|G3GUM9|G3GUM9_CRIGR	Putative ribosomal RNA methyltransferase NOP2 OS=Cricetulus griseus GN=I79_001394 PE=4 SV=1	CRIGR	6
	615	461	11.46	11.46	26.79	20.56	20.56	tr|G3IJV7|G3IJV7_CRIGR	Cytosolic acyl coenzyme A thioester hydrolase OS=Cricetulus griseus GN=I79_024146 PE=4 SV=1	CRIGR	6
	616	462	11.45	11.45	33.87	19.68	16.02	tr|G3IEA9|G3IEA9_CRIGR	Far upstream element-binding protein 3 OS=Cricetulus griseus GN=I79_022054 PE=4 SV=1	CRIGR	6
	617	463	11.45	11.45	52.38	51.43	51.43	tr|G3H2K2|G3H2K2_CRIGR	Cytochrome c, somatic OS=Cricetulus griseus GN=I79_004417 PE=3 SV=1	CRIGR	6
	618	466	11.34	11.34	18.59	14.57	13.23	tr|G3H170|G3H170_CRIGR	Drebrin OS=Cricetulus griseus GN=I79_003894 PE=4 SV=1	CRIGR	6
	619	468	11.31	11.31	35.96	35.96	35.96	tr|G3HC31|G3HC31_CRIGR	Protein S100-A6 OS=Cricetulus griseus GN=I79_008074 PE=4 SV=1	CRIGR	6
	620	470	11.25	11.25	34.11	34.11	34.11	tr|G3HRG8|G3HRG8_CRIGR	Endoplasmic reticulum resident protein ERp44 (Fragment) OS=Cricetulus griseus GN=I79_013434 PE=4 SV=1	CRIGR	6
	621	471	11.24	11.24	22.83	20.78	20.78	tr|G3I1H5|G3I1H5_CRIGR	Legumain OS=Cricetulus griseus GN=I79_017232 PE=4 SV=1	CRIGR	6
	622	472	11.22	11.22	35.27	14.37	10.1	tr|G3HCJ1|G3HCJ1_CRIGR	Lon protease homolog, mitochondrial OS=Cricetulus griseus GN=Lonp1 PE=3 SV=1	CRIGR	6
	623	473	11.16	11.16	13.08	8.65	8.65	tr|G3H4D2|G3H4D2_CRIGR	Glycosyltransferase 25 family member 1 OS=Cricetulus griseus GN=I79_005133 PE=4 SV=1	CRIGR	6
	624	475	11.08	11.08	32.34	30.85	27.86	tr|G3H9V0|G3H9V0_CRIGR	Proteasome subunit beta type OS=Cricetulus griseus GN=I79_007181 PE=3 SV=1	CRIGR	6
	625	476	11.06	11.06	31.33	23.86	15.15	tr|G3H942|G3H942_CRIGR	Histone deacetylase OS=Cricetulus griseus GN=I79_006904 PE=3 SV=1	CRIGR	6
	626	477	11.06	11.06	45.78	38.86	34.04	tr|G3I8H9|G3I8H9_CRIGR	Cysteine and histidine-rich domain-containing protein 1 OS=Cricetulus griseus GN=I79_019852 PE=4 SV=1	CRIGR	6
	627	480	11.03	11.03	11.7	7.231	7.231	tr|G3HJQ8|G3HJQ8_CRIGR	Integrin alpha-3 OS=Cricetulus griseus GN=I79_010907 PE=3 SV=1	CRIGR	6
	628	482	11.01	11.01	27.25	22.64	22.64	tr|G3H7D4|G3H7D4_CRIGR	Endonuclease domain-containing 1 protein (Fragment) OS=Cricetulus griseus GN=I79_006265 PE=4 SV=1	CRIGR	6
	629	484	10.98	10.98	20.84	17.25	9.222	tr|G3GRD8|G3GRD8_CRIGR	Isoleucyl-tRNA synthetase, mitochondrial OS=Cricetulus griseus GN=I79_000083 PE=4 SV=1	CRIGR	6
	630	485	10.98	10.98	66.04	66.04	59.43	tr|G3H3B2|G3H3B2_CRIGR	Cysteine-rich protein 2 OS=Cricetulus griseus GN=I79_004727 PE=4 SV=1	CRIGR	6
	631	486	10.96	10.96	26.95	16.21	14.32	tr|G3H8V5|G3H8V5_CRIGR	Lysosomal protective protein OS=Cricetulus griseus GN=I79_006816 PE=4 SV=1	CRIGR	6
	632	490	10.86	13.77	18.08	16.79	12.56	tr|G3IDJ8|G3IDJ8_CRIGR	6-phosphofructokinase OS=Cricetulus griseus GN=I79_021781 PE=3 SV=1	CRIGR	6
	633	491	10.86	10.92	39.89	26.4	26.4	tr|G3HMV2|G3HMV2_CRIGR	60S ribosomal protein L11 OS=Cricetulus griseus GN=I79_012069 PE=3 SV=1	CRIGR	6
	634	494	10.8	10.8	63.64	63.64	63.64	tr|Q99PF7|Q99PF7_CRIGR	Ribosomal protein S28 (Fragment) OS=Cricetulus griseus PE=2 SV=1	CRIGR	6
	635	494	0	10.8	60.87	60.87	60.87	tr|G3I5R2|G3I5R2_CRIGR	40S ribosomal protein S28 OS=Cricetulus griseus GN=I79_018817 PE=3 SV=1	CRIGR	6
	636	495	10.78	10.78	15.07	10.81	9.825	tr|G3GUY5|G3GUY5_CRIGR	Protein KIAA1967-like OS=Cricetulus griseus GN=I79_001511 PE=4 SV=1	CRIGR	6
	637	498	10.62	10.62	38.53	31.65	31.65	tr|G3I5Q9|G3I5Q9_CRIGR	Ras-related protein Rab-11B OS=Cricetulus griseus GN=I79_018814 PE=3 SV=1	CRIGR	6
	638	502	10.59	10.61	36.15	28.85	28.85	tr|G3I638|G3I638_CRIGR	Eukaryotic translation initiation factor 3 subunit F OS=Cricetulus griseus GN=Eif3f PE=3 SV=1	CRIGR	6
	639	504	10.56	10.56	41.61	35.04	35.04	tr|G3HJD8|G3HJD8_CRIGR	40S ribosomal protein S16 OS=Cricetulus griseus GN=I79_010782 PE=3 SV=1	CRIGR	6
	640	509	10.4	10.4	18.07	14.86	12.67	tr|G3H451|G3H451_CRIGR	Nucleolar protein 56 OS=Cricetulus griseus GN=I79_005051 PE=4 SV=1	CRIGR	6
	641	511	10.33	10.69	17.2	13.54	11.15	tr|G3H0Y9|G3H0Y9_CRIGR	EH domain-containing protein 4 OS=Cricetulus griseus GN=I79_003809 PE=4 SV=1	CRIGR	6
	642	512	10.27	10.27	37.8	36.59	32.32	tr|G3I3X6|G3I3X6_CRIGR	Proteasome subunit alpha type-6 OS=Cricetulus griseus GN=I79_018147 PE=4 SV=1	CRIGR	6
	643	516	10.2	10.2	18.14	12.47	11.11	tr|G3H9T1|G3H9T1_CRIGR	Dolichyl-diphosphooligosaccharide--protein glycosyltransferase 48 kDa subunit OS=Cricetulus griseus GN=I79_007162 PE=4 SV=1	CRIGR	6
	644	520	10.11	10.11	33.82	22.79	22.79	tr|G3HCK3|G3HCK3_CRIGR	ATP-dependent Clp protease proteolytic subunit OS=Cricetulus griseus GN=I79_008214 PE=3 SV=1	CRIGR	6
	645	522	10.04	10.04	50	43.41	43.41	tr|G3I757|G3I757_CRIGR	ADP-ribosylation factor-like protein 3 OS=Cricetulus griseus GN=I79_019342 PE=3 SV=1	CRIGR	6
	646	523	0	8.03	49.34	36.18	31.58	tr|G3I5T9|G3I5T9_CRIGR	Calmodulin (Fragment) OS=Cricetulus griseus GN=I79_018847 PE=4 SV=1	CRIGR	6
	647	528	10	10	17.59	17.59	17.59	tr|G3HRM8|G3HRM8_CRIGR	Nascent polypeptide-associated complex subunit alpha, muscle-specific form OS=Cricetulus griseus GN=I79_013472 PE=4 SV=1	CRIGR	6
	648	534	9.8	9.8	28.83	18.74	15.14	tr|G3I366|G3I366_CRIGR	Prolyl endopeptidase OS=Cricetulus griseus GN=I79_017867 PE=4 SV=1	CRIGR	6
	649	536	9.72	9.72	37.04	28.62	25.25	tr|G3HVL1|G3HVL1_CRIGR	Cell division control protein 2-like OS=Cricetulus griseus GN=I79_015000 PE=4 SV=1	CRIGR	6
	650	537	9.71	9.71	41.86	38.14	38.14	tr|G3HZG2|G3HZG2_CRIGR	Casein kinase II subunit beta OS=Cricetulus griseus GN=I79_016463 PE=4 SV=1	CRIGR	6
	651	542	9.62	9.62	19.12	6.467	5.772	tr|G3I5S9|G3I5S9_CRIGR	Pleckstrin-likey-like domain family B member 1 OS=Cricetulus griseus GN=I79_018836 PE=4 SV=1	CRIGR	6
	652	550	9.41	9.41	31.56	30.22	27.11	tr|G3HDL6|G3HDL6_CRIGR	Elongation factor 1-beta OS=Cricetulus griseus GN=I79_008601 PE=3 SV=1	CRIGR	6
	653	551	9.39	9.39	24.78	16.98	15.25	tr|G3HRD3|G3HRD3_CRIGR	Protein arginine N-methyltransferase 5 OS=Cricetulus griseus GN=I79_013398 PE=4 SV=1	CRIGR	6
	654	553	9.37	10.22	48.43	37.74	37.11	tr|G3HKY0|G3HKY0_CRIGR	High mobility group protein B2 OS=Cricetulus griseus GN=I79_011363 PE=4 SV=1	CRIGR	6
	655	555	9.34	9.34	23.46	16.67	16.67	tr|V5QSN9|V5QSN9_CRIGR	Adenylosuccinate synthase OS=Cricetulus griseus GN=ADSS PE=2 SV=1	CRIGR	6
	656	563	9.1	11.82	21.45	21.45	21.16	tr|G3IIT5|G3IIT5_CRIGR	Nucleosome assembly protein 1-like 4 OS=Cricetulus griseus GN=I79_023761 PE=3 SV=1	CRIGR	6
	657	564	9.1	9.1	25.4	17.94	17.94	tr|G3GXU1|G3GXU1_CRIGR	Protein phosphatase 1G OS=Cricetulus griseus GN=I79_002584 PE=3 SV=1	CRIGR	6
	658	593	8.36	8.36	43.8	43.8	40.5	tr|G3H6F2|G3H6F2_CRIGR	Peptidyl-prolyl cis-trans isomerase NIMA-interacting 1 OS=Cricetulus griseus GN=I79_005909 PE=4 SV=1	CRIGR	6
	659	607	8.16	8.16	34.45	20.74	20.74	tr|G3HF56|G3HF56_CRIGR	Calponin-2 OS=Cricetulus griseus GN=I79_009211 PE=4 SV=1	CRIGR	6
	660	622	8.01	8.01	48.19	40.96	40.96	tr|G3HGW7|G3HGW7_CRIGR	40S ribosomal protein S21 OS=Cricetulus griseus GN=I79_009859 PE=3 SV=1	CRIGR	6
	661	625	8	10	43.24	43.24	43.24	tr|G3HKT3|G3HKT3_CRIGR	Heterogeneous nuclear ribonucleoprotein F OS=Cricetulus griseus GN=I79_011313 PE=4 SV=1	CRIGR	6
	662	651	7.68	7.68	42.86	39.5	38.66	tr|G3H5D5|G3H5D5_CRIGR	Acyl-CoA-binding protein OS=Cricetulus griseus GN=I79_005522 PE=4 SV=1	CRIGR	6
	663	677	7.3	7.3	19.93	19.93	16.01	tr|G3H7B3|G3H7B3_CRIGR	Galectin OS=Cricetulus griseus GN=I79_006244 PE=4 SV=1	CRIGR	6
	664	687	7.15	8.76	29.98	22.54	12.27	tr|G3HPP2|G3HPP2_CRIGR	4-trimethylaminobutyraldehyde dehydrogenase OS=Cricetulus griseus GN=I79_012757 PE=3 SV=1	CRIGR	6
	665	724	6.51	9.3	28.73	14.7	14.7	tr|G3GVT2|G3GVT2_CRIGR	Far upstream element-binding protein 1 OS=Cricetulus griseus GN=I79_001831 PE=4 SV=1	CRIGR	6
	666	725	6.5	9.67	28.9	28.9	19.27	tr|G3H0Q0|G3H0Q0_CRIGR	40S ribosomal protein S6 OS=Cricetulus griseus GN=I79_003714 PE=3 SV=1	CRIGR	6
	667	738	6.37	6.37	39.57	28.88	24.6	tr|Q2MH30|Q2MH30_CRIGR	Dihydrofolate reductase OS=Cricetulus griseus GN=DHFR PE=3 SV=1	CRIGR	6
	668	821	5.62	9.77	39.04	34.22	30.48	tr|G3I216|G3I216_CRIGR	Triosephosphate isomerase OS=Cricetulus griseus GN=I79_017439 PE=3 SV=1	CRIGR	6
	669	886	4.89	10.42	35.36	29.01	26.8	tr|G3HV39|G3HV39_CRIGR	Poly(RC)-binding protein 2 OS=Cricetulus griseus GN=I79_014816 PE=4 SV=1	CRIGR	6
	670	909	4.53	12.3	53.89	49.44	45.56	tr|G3GUS2|G3GUS2_CRIGR	ADP-ribosylation factor 4 OS=Cricetulus griseus GN=I79_001445 PE=3 SV=1	CRIGR	6
	671	928	4.33	11.64	32.84	25.49	24.02	tr|G3HFG4|G3HFG4_CRIGR	60S ribosomal protein L4 OS=Cricetulus griseus GN=I79_009303 PE=4 SV=1	CRIGR	6
	672	991	4	11.45	34.72	31.94	29.17	tr|G3HZH3|G3HZH3_CRIGR	Spliceosome RNA helicase BAT1 OS=Cricetulus griseus GN=I79_016476 PE=4 SV=1	CRIGR	6
	673	1130	2.9	11.21	28.21	28.21	28.21	tr|G3I668|G3I668_CRIGR	Guanine nucleotide-binding protein G(I)/G(S)/G(T) subunit beta-2 OS=Cricetulus griseus GN=I79_018980 PE=4 SV=1	CRIGR	6
	674	1145	2.79	8.52	9.795	2.242	2.242	tr|G3H510|G3H510_CRIGR	Talin-2 OS=Cricetulus griseus GN=I79_005377 PE=4 SV=1	CRIGR	6
	675	1173	2.6	8.26	36.82	19.4	19.4	tr|G3HA25|G3HA25_CRIGR	14-3-3 protein gamma OS=Cricetulus griseus GN=I79_007265 PE=4 SV=1	CRIGR	6
	676	1244	2.17	8.89	19.21	15.5	14.19	tr|G3HHV8|G3HHV8_CRIGR	Histone deacetylase OS=Cricetulus griseus GN=I79_010219 PE=3 SV=1	CRIGR	6
	677	1359	2	6.83	25.56	17.12	14.39	tr|G3GS44|G3GS44_CRIGR	ATP-binding cassette sub-family F member 2 OS=Cricetulus griseus GN=I79_000354 PE=4 SV=1	CRIGR	6
	678	419	12.52	12.52	16.78	6.223	3.725	tr|G3I8U4|G3I8U4_CRIGR	EMILIN-2 (Fragment) OS=Cricetulus griseus GN=I79_019976 PE=4 SV=1	CRIGR	6
	679	1755	0.64	9.06	32.93	23.17	23.17	tr|G3HLN4|G3HLN4_CRIGR	Peptidyl-prolyl cis-trans isomerase OS=Cricetulus griseus GN=I79_011624 PE=3 SV=1	CRIGR	6
	680	476	11.06	11.06	31.33	23.86	15.15	tr|G3H942|G3H942_CRIGR	Histone deacetylase OS=Cricetulus griseus GN=I79_006904 PE=3 SV=1	CRIGR	6
	681	1244	2.17	8.89	19.21	15.5	14.19	tr|G3HHV8|G3HHV8_CRIGR	Histone deacetylase OS=Cricetulus griseus GN=I79_010219 PE=3 SV=1	CRIGR	6
	682	430	12.24	12.24	29.75	21.49	20.25	tr|G3HW06|G3HW06_CRIGR	Adenylosuccinate lyase OS=Cricetulus griseus GN=I79_015153 PE=4 SV=1	CRIGR	6
	683	430	0	12.24	29.75	21.49	20.25	tr|D0UZH8|D0UZH8_CRIGR	Adenylosuccinate lyase OS=Cricetulus griseus GN=ADSL PE=2 SV=1	CRIGR	6
	684	430	0	12.24	29.55	21.49	20.25	tr|D0UZH9|D0UZH9_CRIGR	Mutant adenylosuccinate lyase OS=Cricetulus griseus GN=ADSL PE=2 SV=1	CRIGR	6
	685	473	11.16	11.16	13.08	8.65	8.65	tr|G3H4D2|G3H4D2_CRIGR	Glycosyltransferase 25 family member 1 OS=Cricetulus griseus GN=I79_005133 PE=4 SV=1	CRIGR	6
	686	465	11.35	11.35	41.75	39.81	29.45	tr|G3ILH7|G3ILH7_CRIGR	26S proteasome non-ATPase regulatory subunit 1 OS=Cricetulus griseus GN=I79_024743 PE=4 SV=1	CRIGR	5
	687	479	11.04	11.04	55.86	44.14	28.28	tr|G3GY47|G3GY47_CRIGR	60S ribosomal protein L26 OS=Cricetulus griseus GN=I79_002702 PE=4 SV=1	CRIGR	5
	688	480	0	8.88	9.006	5.91	5.91	sp|P17852-2|ITA3_CRIGR	Isoform 2 of Integrin alpha-3 OS=Cricetulus griseus GN=ITGA3	CRIGR	5
	689	480	0	8.88	7.992	5.994	5.994	sp|P17852|ITA3_CRIGR	Integrin alpha-3 OS=Cricetulus griseus GN=ITGA3 PE=1 SV=3	CRIGR	5
	690	488	10.9	10.9	50.79	48.17	36.65	tr|G3HIM4|G3HIM4_CRIGR	Cell division control protein 42-like OS=Cricetulus griseus GN=I79_010498 PE=3 SV=1	CRIGR	5
	691	489	10.89	10.89	33.43	31.34	26.87	tr|G3HSW9|G3HSW9_CRIGR	Isocitrate dehydrogenase [NAD] subunit gamma, mitochondrial OS=Cricetulus griseus GN=I79_013968 PE=3 SV=1	NAD	5
	692	492	10.82	10.82	42.21	29.76	26.64	tr|G3I3W0|G3I3W0_CRIGR	Calponin-3 OS=Cricetulus griseus GN=I79_018128 PE=4 SV=1	CRIGR	5
	693	493	10.8	10.8	31.85	16.95	13.01	tr|G3HFI6|G3HFI6_CRIGR	ATP-dependent RNA helicase DDX1 OS=Cricetulus griseus GN=I79_009344 PE=4 SV=1	CRIGR	5
	694	497	10.67	10.67	26.48	15.01	8.071	tr|G3I142|G3I142_CRIGR	Splicing factor 3 subunit 1 OS=Cricetulus griseus GN=I79_017088 PE=4 SV=1	CRIGR	5
	695	499	10.61	10.61	11.72	6.897	5.517	tr|G3IL48|G3IL48_CRIGR	Protein transport protein Sec31A OS=Cricetulus griseus GN=I79_024610 PE=4 SV=1	CRIGR	5
	696	506	10.49	10.49	20.18	14.57	10.17	tr|G3GTN3|G3GTN3_CRIGR	Carnitine O-palmitoyltransferase 2, mitochondrial OS=Cricetulus griseus GN=I79_001018 PE=3 SV=1	CRIGR	5
	697	507	10.47	10.47	32.93	20.1	18.4	tr|G3IB32|G3IB32_CRIGR	Twinfilin-1 OS=Cricetulus griseus GN=I79_020820 PE=4 SV=1	CRIGR	5
	698	508	10.41	10.41	40.49	25.27	20.65	tr|G3HCF8|G3HCF8_CRIGR	Endophilin-A2 OS=Cricetulus griseus GN=I79_008168 PE=4 SV=1	CRIGR	5
	699	510	10.39	10.39	19.57	10.92	7.723	tr|G3I518|G3I518_CRIGR	Elongation factor G, mitochondrial OS=Cricetulus griseus GN=I79_018560 PE=3 SV=1	CRIGR	5
	700	513	10.25	10.25	50.98	42.16	27.45	tr|G3H1F4|G3H1F4_CRIGR	Ribosomal protein L15 OS=Cricetulus griseus GN=I79_003979 PE=3 SV=1	CRIGR	5
	701	514	10.22	10.22	12.39	9.13	8.152	tr|G3HNF0|G3HNF0_CRIGR	RNA-binding protein 25 OS=Cricetulus griseus GN=I79_012288 PE=4 SV=1	CRIGR	5
	702	518	10.13	10.13	35.77	33.08	23.46	tr|G3H284|G3H284_CRIGR	Endoplasmic reticulum resident protein 29 OS=Cricetulus griseus GN=I79_004255 PE=3 SV=1	CRIGR	5
	703	519	10.12	10.12	18.69	15.56	11.76	tr|G3H6D0|G3H6D0_CRIGR	Ribonucleoprotein PTB-binding 1 OS=Cricetulus griseus GN=I79_005885 PE=4 SV=1	CRIGR	5
	704	521	10.07	10.2	24.14	24.14	21.84	tr|G3H0C2|G3H0C2_CRIGR	Proteasome subunit alpha type OS=Cricetulus griseus GN=I79_003577 PE=3 SV=1	CRIGR	5
	705	526	10	10	52.1	52.1	52.1	tr|G3ILI6|G3ILI6_CRIGR	26S proteasome non-ATPase regulatory subunit 3 OS=Cricetulus griseus GN=I79_024752 PE=4 SV=1	CRIGR	5
	706	527	10	10	44.44	44.44	44.44	tr|G3ICY6|G3ICY6_CRIGR	40S ribosomal protein S17 OS=Cricetulus griseus GN=I79_021541 PE=3 SV=1	CRIGR	5
	707	527	0	10	44.44	44.44	44.44	sp|P63274|RS17_CRIGR	40S ribosomal protein S17 OS=Cricetulus griseus GN=RPS17 PE=2 SV=2	CRIGR	5
	708	529	9.93	9.93	41.76	28.21	26.01	tr|G3I334|G3I334_CRIGR	Hydroxyacyl-coenzyme A dehydrogenase, mitochondrial OS=Cricetulus griseus GN=I79_017834 PE=4 SV=1	CRIGR	5
	709	530	9.93	9.93	26.43	23.25	20.06	tr|G3HSM4|G3HSM4_CRIGR	Small glutamine-rich tetratricopeptide repeat-containing protein alpha OS=Cricetulus griseus GN=I79_013858 PE=4 SV=1	CRIGR	5
	710	531	9.92	9.92	21.68	15.73	11.89	tr|G3GZD2|G3GZD2_CRIGR	Phosphoglucomutase-1 OS=Cricetulus griseus GN=I79_003195 PE=3 SV=1	CRIGR	5
	711	532	9.87	9.87	27.92	23.38	19.48	tr|G3H485|G3H485_CRIGR	Coatomer subunit epsilon OS=Cricetulus griseus GN=I79_005085 PE=4 SV=1	CRIGR	5
	712	532	0	9.87	27.92	23.38	19.48	sp|Q60445|COPE_CRIGR	Coatomer subunit epsilon OS=Cricetulus griseus GN=COPE PE=2 SV=2	CRIGR	5
	713	533	9.84	9.84	32.12	18.99	18.99	tr|G3GS40|G3GS40_CRIGR	Succinyl-CoA ligase [GDP-forming] subunit beta, mitochondrial OS=Cricetulus griseus GN=I79_000350 PE=4 SV=1	GDP-forming	5
	714	540	9.66	9.66	20.73	17.59	13.65	tr|G3H853|G3H853_CRIGR	cAMP-dependent protein kinase type I-alpha regulatory subunit OS=Cricetulus griseus GN=I79_006551 PE=4 SV=1	CRIGR	5
	715	541	9.64	9.64	19.73	16.32	12.52	tr|G3HXN7|G3HXN7_CRIGR	Beta-hexosaminidase OS=Cricetulus griseus GN=I79_015800 PE=3 SV=1	CRIGR	5
	716	543	9.6	9.6	38.07	24.77	22.96	tr|G3ICL7|G3ICL7_CRIGR	Voltage-gated potassium channel subunit beta-2 OS=Cricetulus griseus GN=I79_021415 PE=4 SV=1	CRIGR	5
	717	544	9.59	9.59	29.43	26.95	26.6	tr|G3I3W4|G3I3W4_CRIGR	S-formylglutathione hydrolase OS=Cricetulus griseus GN=I79_018133 PE=4 SV=1	CRIGR	5
	718	547	9.47	9.47	11.83	8.961	8.961	tr|G3GU12|G3GU12_CRIGR	A-kinase anchor protein 12 OS=Cricetulus griseus GN=I79_001159 PE=4 SV=1	CRIGR	5
	719	552	9.39	9.39	42.23	34.47	30.58	tr|G3H3P1|G3H3P1_CRIGR	Ras-related protein Rab-18 OS=Cricetulus griseus GN=I79_004870 PE=3 SV=1	CRIGR	5
	720	556	9.29	9.29	26.45	24.52	24.52	tr|G3I179|G3I179_CRIGR	26S proteasome non-ATPase regulatory subunit 14 OS=Cricetulus griseus GN=I79_017128 PE=4 SV=1	CRIGR	5
	721	557	9.27	9.27	35.91	22.65	22.65	tr|G3I388|G3I388_CRIGR	28 kDa heat-and acid-stable phosphoprotein OS=Cricetulus griseus GN=I79_017889 PE=4 SV=1	CRIGR	5
	722	559	9.24	9.24	44.61	29.41	25.98	tr|G3IGI0|G3IGI0_CRIGR	60S ribosomal protein L23a OS=Cricetulus griseus GN=I79_022895 PE=3 SV=1	CRIGR	5
	723	559	0	9.24	38.46	38.46	33.97	tr|G3HQ39|G3HQ39_CRIGR	60S ribosomal protein L23a OS=Cricetulus griseus GN=I79_012931 PE=3 SV=1	CRIGR	5
	724	560	9.21	9.21	16.78	12.67	11.13	tr|G3HTR9|G3HTR9_CRIGR	Malic enzyme OS=Cricetulus griseus GN=I79_014297 PE=3 SV=1	CRIGR	5
	725	561	9.15	9.15	46.36	45.45	38.18	tr|G3HSH4|G3HSH4_CRIGR	60S ribosomal protein L24 OS=Cricetulus griseus GN=I79_013806 PE=4 SV=1	CRIGR	5
	726	565	9.08	9.08	34.81	24.42	19.48	tr|G3H450|G3H450_CRIGR	Isocitrate dehydrogenase [NAD] subunit beta, mitochondrial OS=Cricetulus griseus GN=I79_005045 PE=3 SV=1	NAD	5
	727	567	8.95	8.95	17.23	12.61	11.37	tr|G3GXY1|G3GXY1_CRIGR	Beta-catenin-like protein 1 OS=Cricetulus griseus GN=I79_002626 PE=4 SV=1	CRIGR	5
	728	568	8.95	8.95	30.04	30.04	30.04	tr|G3IK39|G3IK39_CRIGR	RNA 3'-terminal phosphate cyclase OS=Cricetulus griseus GN=I79_024232 PE=4 SV=1	CRIGR	5
	729	569	8.94	8.94	47.93	47.34	47.34	tr|G3H4D3|G3H4D3_CRIGR	6-phosphogluconolactonase OS=Cricetulus griseus GN=I79_005134 PE=4 SV=1	CRIGR	5
	730	570	8.91	8.91	28.25	14.27	9.091	tr|G3HWN6|G3HWN6_CRIGR	DNA topoisomerase 1 (Fragment) OS=Cricetulus griseus GN=I79_015397 PE=4 SV=1	CRIGR	5
	731	575	8.77	8.77	17.34	9.952	9.952	tr|G3IAG0|G3IAG0_CRIGR	Xaa-Pro aminopeptidase 1 OS=Cricetulus griseus GN=I79_020582 PE=3 SV=1	CRIGR	5
	732	576	8.71	8.71	41.4	32.8	24.46	tr|G3HQV4|G3HQV4_CRIGR	3-ketoacyl-CoA thiolase B, peroxisomal (Fragment) OS=Cricetulus griseus GN=I79_013210 PE=3 SV=1	CRIGR	5
	733	577	8.66	8.66	28.65	28.65	25.79	tr|G3GRH9|G3GRH9_CRIGR	Tropomodulin-3 OS=Cricetulus griseus GN=I79_000124 PE=4 SV=1	CRIGR	5
	734	579	8.59	8.59	20.95	12.86	11.62	tr|G3I9F1|G3I9F1_CRIGR	Ras GTPase-activating protein-binding protein 2 OS=Cricetulus griseus GN=I79_020192 PE=4 SV=1	CRIGR	5
	735	580	8.59	8.59	28.42	20.89	17.12	tr|G3IJB6|G3IJB6_CRIGR	Protein RCC2 OS=Cricetulus griseus GN=I79_023949 PE=4 SV=1	CRIGR	5
	736	583	8.54	8.54	35.43	29.15	22.42	tr|G3H453|G3H453_CRIGR	Small nuclear ribonucleoprotein-associated protein OS=Cricetulus griseus GN=I79_005053 PE=3 SV=1	CRIGR	5
	737	583	0	8.5	29.74	28.02	21.55	tr|G3I1I8|G3I1I8_CRIGR	Small nuclear ribonucleoprotein-associated protein OS=Cricetulus griseus GN=I79_017249 PE=3 SV=1	CRIGR	5
	738	584	8.5	8.5	49	25.5	25.5	tr|G3IBF7|G3IBF7_CRIGR	Ubiquitin-conjugating enzyme E2 K OS=Cricetulus griseus GN=I79_020977 PE=3 SV=1	CRIGR	5
	739	588	8.43	8.43	14.92	6.69	4.974	tr|G3HRY8|G3HRY8_CRIGR	SWI/SNF-related matrix-associated actin-dependent regulator of chromatin subfamily A member 5 OS=Cricetulus griseus GN=I79_013613 PE=4 SV=1	CRIGR	5
	740	589	8.39	8.39	26.64	22.9	22.9	tr|G3HRM9|G3HRM9_CRIGR	Prostaglandin E synthase 3 (Fragment) OS=Cricetulus griseus GN=I79_013473 PE=4 SV=1	CRIGR	5
	741	592	8.36	8.36	47.89	43.68	26.32	tr|G3IPV6|G3IPV6_CRIGR	26S proteasome non-ATPase regulatory subunit 3 OS=Cricetulus griseus GN=I79_026038 PE=4 SV=1	CRIGR	5
	742	594	8.34	8.34	30.22	17.69	17.69	tr|G3GU92|G3GU92_CRIGR	Lupus La protein-like OS=Cricetulus griseus GN=I79_001246 PE=4 SV=1	CRIGR	5
	743	598	8.26	8.26	35.74	22.22	16.52	tr|G3HQ05|G3HQ05_CRIGR	Succinyl-CoA ligase [GDP-forming] subunit alpha, mitochondrial OS=Cricetulus griseus GN=I79_012893 PE=3 SV=1	GDP-forming	5
	744	600	8.21	8.21	12.56	7.681	7.164	tr|G3I505|G3I505_CRIGR	Eukaryotic translation initiation factor 3 subunit L OS=Cricetulus griseus GN=I79_018545 PE=3 SV=1	CRIGR	5
	745	602	8.21	8.21	32.22	26.67	26.67	sp|P47952|APT_CRIGR	Adenine phosphoribosyltransferase OS=Cricetulus griseus GN=APRT PE=3 SV=2	CRIGR	5
	746	602	0	8.16	25	25	25	tr|G3GRT0|G3GRT0_CRIGR	Adenine phosphoribosyltransferase OS=Cricetulus griseus GN=I79_000224 PE=3 SV=1	CRIGR	5
	747	606	8.17	8.17	10.56	9.191	8.368	tr|G3I3C7|G3I3C7_CRIGR	Putative allantoicase OS=Cricetulus griseus GN=I79_017931 PE=4 SV=1	CRIGR	5
	748	613	8.08	8.08	38.79	17.53	17.53	tr|G3HCW3|G3HCW3_CRIGR	ATPase Asna1 OS=Cricetulus griseus GN=Asna1 PE=3 SV=1	CRIGR	5
	749	615	8.07	8.07	16.85	6.696	5.372	tr|G3H9P3|G3H9P3_CRIGR	Serine/threonine-protein kinase 10 OS=Cricetulus griseus GN=I79_007123 PE=4 SV=1	CRIGR	5
	750	627	8	8	26.02	14.22	14.22	tr|G3I0F7|G3I0F7_CRIGR	Alpha-N-acetylgalactosaminidase OS=Cricetulus griseus GN=I79_016839 PE=4 SV=1	CRIGR	5
	751	647	7.74	7.74	12.26	6.166	3.756	tr|G3HKQ9|G3HKQ9_CRIGR	SWI/SNF complex subunit SMARCC1 (Fragment) OS=Cricetulus griseus GN=I79_011288 PE=4 SV=1	CRIGR	5
	752	649	7.69	7.69	34.7	22.13	15.57	tr|G3H168|G3H168_CRIGR	PDZ and LIM domain protein 7 OS=Cricetulus griseus GN=I79_003892 PE=4 SV=1	CRIGR	5
	753	650	7.68	7.68	48.28	37.93	37.93	tr|G3IBV7|G3IBV7_CRIGR	Cytochrome b5 OS=Cricetulus griseus GN=I79_021140 PE=3 SV=1	CRIGR	5
	754	663	7.45	7.45	32.57	19.22	19.22	tr|G3I4H5|G3I4H5_CRIGR	Serine/threonine-protein phosphatase OS=Cricetulus griseus GN=I79_018354 PE=3 SV=1	CRIGR	5
	755	666	7.4	7.4	21.26	15.8	15.8	sp|Q60438|CREL2_CRIGR	Cysteine-rich with EGF-like domain protein 2 OS=Cricetulus griseus GN=CRELD2 PE=2 SV=1	CRIGR	5
	756	671	7.34	7.34	10.15	3.854	3.073	tr|G3HA18|G3HA18_CRIGR	Huntingtin-interacting protein 1 OS=Cricetulus griseus GN=I79_007259 PE=4 SV=1	CRIGR	5
	757	675	7.3	7.3	30.7	19.15	16.72	tr|G3HH71|G3HH71_CRIGR	Putative RNA-binding protein Luc7-like 2 OS=Cricetulus griseus GN=I79_009968 PE=4 SV=1	CRIGR	5
	758	678	7.25	7.27	27.84	15.72	12.12	tr|G3H935|G3H935_CRIGR	Tyrosyl-tRNA synthetase, cytoplasmic OS=Cricetulus griseus GN=I79_006897 PE=4 SV=1	CRIGR	5
	759	690	7.05	7.15	22.82	14.84	11.5	tr|G3IM40|G3IM40_CRIGR	26S proteasome non-ATPase regulatory subunit 1 OS=Cricetulus griseus GN=I79_024971 PE=4 SV=1	CRIGR	5
	760	691	7.05	7.05	42.29	33.92	22.91	tr|G3HS21|G3HS21_CRIGR	GTP:AMP phosphotransferase mitochondrial OS=Cricetulus griseus GN=I79_013646 PE=3 SV=1	CRIGR	5
	761	696	6.93	6.93	16.46	8.105	8.105	tr|G3I000|G3I000_CRIGR	Aldehyde dehydrogenase family 16 member A1 OS=Cricetulus griseus GN=I79_016665 PE=4 SV=1	CRIGR	5
	762	705	6.81	6.81	20.14	20.14	20.14	tr|G3HAP1|G3HAP1_CRIGR	Microtubule-associated proteins 1A/1B light chain 3A OS=Cricetulus griseus GN=I79_007497 PE=3 SV=1	CRIGR	5
	763	757	6.1	6.1	43.52	43.52	36.11	tr|G3HPF1|G3HPF1_CRIGR	Small nuclear ribonucleoprotein Sm D2 OS=Cricetulus griseus GN=I79_012663 PE=4 SV=1	CRIGR	5
	764	766	6.06	6.06	58.51	42.55	42.55	tr|G3H3C0|G3H3C0_CRIGR	60S ribosomal protein L30 OS=Cricetulus griseus GN=I79_004735 PE=4 SV=1	CRIGR	5
	765	766	0	5.31	19.74	19.74	19.74	tr|G3IM94|G3IM94_CRIGR	60S ribosomal protein L30 OS=Cricetulus griseus GN=I79_025029 PE=4 SV=1	CRIGR	5
	766	779	6.01	9.55	26.54	18.32	15.51	tr|G3I4G0|G3I4G0_CRIGR	EH domain-containing protein 3 OS=Cricetulus griseus GN=I79_018338 PE=4 SV=1	CRIGR	5
	767	790	6	6	29.95	29.41	29.41	tr|G3GXB1|G3GXB1_CRIGR	THO complex subunit 4 OS=Cricetulus griseus GN=I79_002401 PE=4 SV=1	CRIGR	5
	768	820	5.65	5.65	84.96	63.72	63.72	tr|G3IIK9|G3IIK9_CRIGR	Cornifin-A OS=Cricetulus griseus GN=I79_023682 PE=4 SV=1	CRIGR	5
	769	826	5.54	5.54	11.08	11.08	8.108	tr|G3HK56|G3HK56_CRIGR	Lysosome-associated membrane glycoprotein 1 OS=Cricetulus griseus GN=I79_011073 PE=4 SV=1	CRIGR	5
	770	826	0	5.54	10.07	10.07	7.371	sp|P49129|LAMP1_CRIGR	Lysosome-associated membrane glycoprotein 1 OS=Cricetulus griseus GN=LAMP1 PE=2 SV=1	CRIGR	5
	771	826	0	5.41	7.444	7.444	7.444	tr|G3I7Y3|G3I7Y3_CRIGR	Lysosome-associated membrane glycoprotein 1 OS=Cricetulus griseus GN=I79_019634 PE=4 SV=1	CRIGR	5
	772	845	5.38	10.22	28.46	18.62	15.16	tr|G3H771|G3H771_CRIGR	Septin-6 OS=Cricetulus griseus GN=I79_006198 PE=3 SV=1	CRIGR	5
	773	893	4.72	9.18	21.4	18.08	15.13	tr|G3I783|G3I783_CRIGR	Heterogeneous nuclear ribonucleoprotein D-like OS=Cricetulus griseus GN=I79_019368 PE=4 SV=1	CRIGR	5
	774	899	4.67	8.78	27.11	18.16	15.26	tr|G3HSM1|G3HSM1_CRIGR	Dual specificity mitogen-activated protein kinase kinase 2 OS=Cricetulus griseus GN=I79_013855 PE=4 SV=1	CRIGR	5
	775	967	4.05	4.05	43.84	32.88	32.88	tr|G3HYG9|G3HYG9_CRIGR	Mitochondrial import inner membrane translocase subunit Tim13 OS=Cricetulus griseus GN=I79_016102 PE=4 SV=1	CRIGR	5
	776	1036	3.73	9.71	18.34	10.45	6.397	tr|G3I3I0|G3I3I0_CRIGR	AP-2 complex subunit alpha-2 OS=Cricetulus griseus GN=I79_017988 PE=4 SV=1	CRIGR	5
	777	1103	0	9.42	31.11	30.56	30.56	tr|G3I3I5|G3I3I5_CRIGR	60S ribosomal protein L7a OS=Cricetulus griseus GN=I79_017993 PE=4 SV=1	CRIGR	5
	778	1103	0	8.89	36.36	35.8	35.8	tr|G3HYK9|G3HYK9_CRIGR	60S ribosomal protein L7a (Fragment) OS=Cricetulus griseus GN=I79_016147 PE=4 SV=1	CRIGR	5
	779	1103	0	8.48	25.45	25	25	tr|G3H7V4|G3H7V4_CRIGR	60S ribosomal protein L7a OS=Cricetulus griseus GN=I79_006447 PE=4 SV=1	CRIGR	5
	780	1173	0	6.08	32.93	18.56	18.56	tr|G3IPD7|G3IPD7_CRIGR	14-3-3 protein gamma OS=Cricetulus griseus GN=I79_025844 PE=4 SV=1	CRIGR	5
	781	1269	2.1	11.22	10.31	7.661	5.424	tr|G3I7M5|G3I7M5_CRIGR	Sarcoplasmic/endoplasmic reticulum calcium ATPase 1 OS=Cricetulus griseus GN=I79_019518 PE=3 SV=1	CRIGR	5
	782	1320	2.02	9.33	11.01	9.677	9.488	tr|G3H937|G3H937_CRIGR	Histone-binding protein RBBP4 OS=Cricetulus griseus GN=I79_006900 PE=4 SV=1	CRIGR	5
	783	1340	2.01	5.9	20.75	12.24	12.24	tr|G3HNV7|G3HNV7_CRIGR	Glyceraldehyde-3-phosphate dehydrogenase OS=Cricetulus griseus GN=I79_012452 PE=3 SV=1	CRIGR	5
	784	1358	2	9.63	28.13	24.48	24.48	tr|G3HV97|G3HV97_CRIGR	Ribose-phosphate pyrophosphokinase 1 OS=Cricetulus griseus GN=I79_014877 PE=4 SV=1	CRIGR	5
	785	588	8.43	8.43	14.92	6.69	4.974	tr|G3HRY8|G3HRY8_CRIGR	SWI/SNF-related matrix-associated actin-dependent regulator of chromatin subfamily A member 5 OS=Cricetulus griseus GN=I79_013613 PE=4 SV=1	CRIGR	5
	786	1680	0.84	8.79	55.49	46.82	41.04	tr|G3GZ81|G3GZ81_CRIGR	ADP-ribosylation factor 5 OS=Cricetulus griseus GN=I79_003112 PE=3 SV=1	CRIGR	5
	787	556	9.29	9.29	26.45	24.52	24.52	tr|G3I179|G3I179_CRIGR	26S proteasome non-ATPase regulatory subunit 14 OS=Cricetulus griseus GN=I79_017128 PE=4 SV=1	CRIGR	5
	788	845	5.38	10.22	28.46	18.62	15.16	tr|G3H771|G3H771_CRIGR	Septin-6 OS=Cricetulus griseus GN=I79_006198 PE=3 SV=1	CRIGR	5
	789	540	9.66	9.66	20.73	17.59	13.65	tr|G3H853|G3H853_CRIGR	cAMP-dependent protein kinase type I-alpha regulatory subunit OS=Cricetulus griseus GN=I79_006551 PE=4 SV=1	CRIGR	5
	790	570	8.91	8.91	28.25	14.27	9.091	tr|G3HWN6|G3HWN6_CRIGR	DNA topoisomerase 1 (Fragment) OS=Cricetulus griseus GN=I79_015397 PE=4 SV=1	CRIGR	5
	791	2696	0.06	10.34	12.4	3.15	2.4	tr|G3I729|G3I729_CRIGR	Myosin-14 OS=Cricetulus griseus GN=I79_019310 PE=4 SV=1	CRIGR	5
	792	671	7.34	7.34	10.15	3.854	3.073	tr|G3HA18|G3HA18_CRIGR	Huntingtin-interacting protein 1 OS=Cricetulus griseus GN=I79_007259 PE=4 SV=1	CRIGR	5
	793	510	10.39	10.39	19.57	10.92	7.723	tr|G3I518|G3I518_CRIGR	Elongation factor G, mitochondrial OS=Cricetulus griseus GN=I79_018560 PE=3 SV=1	CRIGR	5
	794	505	10.51	10.51	46.62	40.54	23.65	tr|G3I3W6|G3I3W6_CRIGR	60S ribosomal protein L27a OS=Cricetulus griseus GN=I79_018135 PE=3 SV=1	CRIGR	4
	795	548	9.45	9.45	20.9	9.386	5.119	tr|G3H160|G3H160_CRIGR	Putative ATP-dependent RNA helicase DDX46 OS=Cricetulus griseus GN=I79_003884 PE=4 SV=1	CRIGR	4
	796	570	0	6.35	24.38	10.69	5.867	sp|Q07050|TOP1_CRIGR	DNA topoisomerase 1 OS=Cricetulus griseus GN=TOP1 PE=2 SV=1	CRIGR	4
	797	571	8.9	8.9	53.15	32.87	22.38	tr|G3IIG4|G3IIG4_CRIGR	60S ribosomal protein L7 OS=Cricetulus griseus GN=I79_023633 PE=4 SV=1	CRIGR	4
	798	572	8.89	8.89	56.95	41.72	29.8	sp|Q9WVH0|RS13_CRIGR	40S ribosomal protein S13 OS=Cricetulus griseus GN=RPS13 PE=3 SV=3	CRIGR	4
	799	573	8.85	8.85	17.23	9.508	5.263	tr|G3I4L6|G3I4L6_CRIGR	Pyruvate carboxylase OS=Cricetulus griseus GN=PC PE=2 SV=1	CRIGR	4
	800	574	8.77	8.77	11.43	8.381	5.753	tr|G3HKX1|G3HKX1_CRIGR	Enhancer of mRNA-decapping protein 4 OS=Cricetulus griseus GN=I79_011353 PE=4 SV=1	CRIGR	4
	801	578	8.61	8.67	12.38	4.715	2.953	tr|G3GUN0|G3GUN0_CRIGR	Chromodomain-helicase-DNA-binding protein 4 OS=Cricetulus griseus GN=I79_001396 PE=4 SV=1	CRIGR	4
	802	581	8.59	8.59	18.95	17.37	12.11	tr|G3HKN1|G3HKN1_CRIGR	Protein SET OS=Cricetulus griseus GN=I79_011260 PE=3 SV=1	CRIGR	4
	803	582	8.56	8.56	27.44	27.44	22.33	tr|G3HDE5|G3HDE5_CRIGR	Proteasome activator complex subunit 1 OS=Cricetulus griseus GN=I79_008549 PE=4 SV=1	CRIGR	4
	804	582	0	8	36.92	36.92	36.92	tr|G3HUD3|G3HUD3_CRIGR	Proteasome activator complex subunit 1 OS=Cricetulus griseus GN=I79_014541 PE=4 SV=1	CRIGR	4
	805	585	8.49	8.49	35	24.21	13.95	tr|G3I8L4|G3I8L4_CRIGR	Sorting nexin-6 (Fragment) OS=Cricetulus griseus GN=I79_019890 PE=4 SV=1	CRIGR	4
	806	586	8.48	8.48	20.15	17.38	9.231	tr|G3H3H9|G3H3H9_CRIGR	Aminopeptidase B OS=Cricetulus griseus GN=I79_004826 PE=4 SV=1	CRIGR	4
	807	587	8.46	8.46	23.25	22.93	16.24	tr|G3GV42|G3GV42_CRIGR	Asparaginyl-tRNA synthetase, cytoplasmic OS=Cricetulus griseus GN=I79_001573 PE=3 SV=1	CRIGR	4
	808	590	8.38	8.38	48.52	31.22	27.43	tr|G3HSZ7|G3HSZ7_CRIGR	Heterogeneous nuclear ribonucleoprotein L-like OS=Cricetulus griseus GN=I79_013997 PE=4 SV=1	CRIGR	4
	809	591	8.37	8.37	12.67	6.25	5.25	tr|G3GYR1|G3GYR1_CRIGR	Putative E3 ubiquitin-protein ligase HECTD3 OS=Cricetulus griseus GN=I79_002967 PE=4 SV=1	CRIGR	4
	810	596	8.33	8.33	21.53	18.56	13.12	tr|G3HEZ1|G3HEZ1_CRIGR	Eukaryotic peptide chain release factor subunit 1 OS=Cricetulus griseus GN=I79_009142 PE=4 SV=1	CRIGR	4
	811	597	8.3	8.3	27.01	15.52	9.579	tr|G3H530|G3H530_CRIGR	Sorting nexin-1 OS=Cricetulus griseus GN=I79_005399 PE=4 SV=1	CRIGR	4
	812	599	8.25	8.25	18.67	11.47	5.849	tr|G4Y367|G4Y367_CRIGR	Hexokinase 1 (Fragment) OS=Cricetulus griseus GN=HK1 PE=2 SV=1	CRIGR	4
	813	599	0	7.82	15.59	8.615	5.671	tr|G3H6T5|G3H6T5_CRIGR	Hexokinase-1 OS=Cricetulus griseus GN=I79_006054 PE=3 SV=1	CRIGR	4
	814	601	8.21	8.21	76.27	74.58	50.85	tr|G3HIQ3|G3HIQ3_CRIGR	Activated RNA polymerase II transcriptional coactivator p15 OS=Cricetulus griseus GN=I79_010528 PE=4 SV=1	CRIGR	4
	815	603	8.19	8.19	31.74	27.54	16.17	tr|G3ID93|G3ID93_CRIGR	WD repeat-containing protein 5 OS=Cricetulus griseus GN=I79_021666 PE=4 SV=1	CRIGR	4
	816	604	8.18	8.18	34.23	32.31	24.62	tr|G3HXT3|G3HXT3_CRIGR	Protein kinase C and casein kinase substrate in neurons protein 2 OS=Cricetulus griseus GN=I79_015847 PE=4 SV=1	CRIGR	4
	817	605	8.17	8.17	31.05	26.71	18.41	tr|G3HN65|G3HN65_CRIGR	Ras suppressor protein 1 OS=Cricetulus griseus GN=I79_012198 PE=4 SV=1	CRIGR	4
	818	608	8.15	8.15	68.69	52.53	41.41	tr|G3ILX2|G3ILX2_CRIGR	26S proteasome non-ATPase regulatory subunit 13 OS=Cricetulus griseus GN=I79_024894 PE=4 SV=1	CRIGR	4
	819	609	8.13	8.13	61.28	46.38	31.91	tr|G3HNP4|G3HNP4_CRIGR	rRNA 2'-O-methyltransferase fibrillarin OS=Cricetulus griseus GN=I79_012386 PE=3 SV=1	CRIGR	4
	820	610	8.13	8.13	10.94	9.784	8.777	tr|G3HIU2|G3HIU2_CRIGR	Transportin-1 OS=Cricetulus griseus GN=I79_010569 PE=4 SV=1	CRIGR	4
	821	611	8.12	8.12	18.6	17.07	14.22	tr|G3HUX4|G3HUX4_CRIGR	Ubiquitin carboxyl-terminal hydrolase 14 OS=Cricetulus griseus GN=I79_014744 PE=4 SV=1	CRIGR	4
	822	612	8.11	8.11	10.06	5.347	3.751	tr|G3HT77|G3HT77_CRIGR	Cytoplasmic FMR1-interacting protein 1 OS=Cricetulus griseus GN=I79_014098 PE=4 SV=1	CRIGR	4
	823	614	8.08	8.08	37.54	24.61	24.61	tr|G3H0D2|G3H0D2_CRIGR	Reticulocalbin-2 OS=Cricetulus griseus GN=I79_003587 PE=4 SV=1	CRIGR	4
	824	617	8.07	8.07	22.75	7.94	5.794	tr|G3HRJ7|G3HRJ7_CRIGR	Catenin delta-1 OS=Cricetulus griseus GN=I79_013441 PE=4 SV=1	CRIGR	4
	825	618	8.07	8.07	17.96	14.07	14.07	tr|G3I1Z7|G3I1Z7_CRIGR	Developmentally-regulated GTP-binding protein 1 OS=Cricetulus griseus GN=I79_017418 PE=4 SV=1	CRIGR	4
	826	619	8.07	8.07	45.98	37.36	37.36	tr|G3HBY2|G3HBY2_CRIGR	Hematological and neurological expressed 1-like protein OS=Cricetulus griseus GN=I79_007934 PE=4 SV=1	CRIGR	4
	827	620	8.06	8.06	34.34	26.94	20.54	sp|P46635|THTR_CRIGR	Thiosulfate sulfurtransferase OS=Cricetulus griseus GN=TST PE=2 SV=2	CRIGR	4
	828	621	8.06	8.06	26.26	22.07	22.07	tr|G3HP64|G3HP64_CRIGR	Sequestosome-1 OS=Cricetulus griseus GN=I79_012570 PE=4 SV=1	CRIGR	4
	829	626	8	8.02	36.09	31.95	31.95	tr|G3HS88|G3HS88_CRIGR	Ubiquitin-conjugating enzyme E2 N (Fragment) OS=Cricetulus griseus GN=I79_013714 PE=3 SV=1	CRIGR	4
	830	628	8	8	21.35	10.96	10.96	tr|G3HE28|G3HE28_CRIGR	Mitochondrial-processing peptidase subunit beta OS=Cricetulus griseus GN=I79_008799 PE=3 SV=1	CRIGR	4
	831	629	8	8	36.36	32.06	32.06	tr|G3GYD5|G3GYD5_CRIGR	Complement component 1 Q subcomponent-binding protein, mitochondrial OS=Cricetulus griseus GN=I79_002810 PE=4 SV=1	CRIGR	4
	832	630	8	8	38.24	33.09	33.09	tr|G3HZW3|G3HZW3_CRIGR	60S ribosomal protein L18 OS=Cricetulus griseus GN=I79_016627 PE=4 SV=1	CRIGR	4
	833	631	8	8	54.19	44.13	44.13	tr|G3HFY6|G3HFY6_CRIGR	Stromal cell-derived factor 2-like protein 1 OS=Cricetulus griseus GN=I79_009504 PE=4 SV=1	CRIGR	4
	834	632	8	8	29.76	22.62	22.62	tr|G3GX96|G3GX96_CRIGR	Actin-related protein 2/3 complex subunit 4 OS=Cricetulus griseus GN=I79_002331 PE=4 SV=1	CRIGR	4
	835	633	8	8	44.35	44.35	44.35	tr|G3I0Q1|G3I0Q1_CRIGR	40S ribosomal protein S26 OS=Cricetulus griseus GN=I79_016940 PE=4 SV=1	CRIGR	4
	836	633	0	8	44.35	44.35	44.35	tr|G3H6W7|G3H6W7_CRIGR	40S ribosomal protein S26 OS=Cricetulus griseus GN=I79_006087 PE=4 SV=1	CRIGR	4
	837	634	7.92	7.92	22.02	16.97	11.91	tr|G3I9D3|G3I9D3_CRIGR	Proteasome subunit beta type OS=Cricetulus griseus GN=I79_020170 PE=3 SV=1	CRIGR	4
	838	635	7.92	7.92	23.61	22.75	22.75	tr|G3HSW8|G3HSW8_CRIGR	Translocon-associated protein subunit delta OS=Cricetulus griseus GN=I79_013967 PE=4 SV=1	CRIGR	4
	839	636	7.89	7.89	41.6	32.8	32.8	tr|G3HHK3|G3HHK3_CRIGR	60S ribosomal protein L31 OS=Cricetulus griseus GN=I79_010107 PE=4 SV=1	CRIGR	4
	840	636	0	7.89	41.6	32.8	32.8	tr|G3H7J9|G3H7J9_CRIGR	60S ribosomal protein L31 OS=Cricetulus griseus GN=I79_006331 PE=4 SV=1	CRIGR	4
	841	637	7.88	7.88	25.38	19.88	16.82	tr|G3HTF8|G3HTF8_CRIGR	Proto-oncogene C-crk OS=Cricetulus griseus GN=I79_014183 PE=4 SV=1	CRIGR	4
	842	638	7.86	7.86	37.6	17.72	13.39	tr|G3HCX7|G3HCX7_CRIGR	Phenylalanyl-tRNA synthetase alpha chain OS=Cricetulus griseus GN=I79_008345 PE=4 SV=1	CRIGR	4
	843	639	7.85	7.85	42.86	29.12	29.12	tr|G3HRP2|G3HRP2_CRIGR	Protein canopy-like 2 OS=Cricetulus griseus GN=I79_013488 PE=4 SV=1	CRIGR	4
	844	640	7.85	7.85	25	25	25	tr|G3I2D3|G3I2D3_CRIGR	40S ribosomal protein S20 OS=Cricetulus griseus GN=I79_017563 PE=3 SV=1	CRIGR	4
	845	641	7.82	7.82	31.45	26.5	26.5	tr|G3IIA1|G3IIA1_CRIGR	Methylosome protein 50 (Fragment) OS=Cricetulus griseus GN=I79_023569 PE=4 SV=1	CRIGR	4
	846	642	7.8	7.8	22.54	12.91	12.91	tr|G3HY75|G3HY75_CRIGR	Serine/threonine-protein phosphatase 2A 55 kDa regulatory subunit B OS=Cricetulus griseus GN=I79_015996 PE=3 SV=1	CRIGR	4
	847	643	7.8	7.8	21.25	21.25	17.58	tr|G3IND2|G3IND2_CRIGR	26S proteasome non-ATPase regulatory subunit 13 OS=Cricetulus griseus GN=I79_025448 PE=4 SV=1	CRIGR	4
	848	644	7.8	7.8	22.91	11.33	11.33	tr|G3IA32|G3IA32_CRIGR	COP9 signalosome complex subunit 4 OS=Cricetulus griseus GN=I79_020448 PE=4 SV=1	CRIGR	4
	849	645	7.75	7.75	29.59	23.22	16.48	tr|G3IFA9|G3IFA9_CRIGR	Transcription elongation factor B polypeptide 2 OS=Cricetulus griseus GN=I79_022430 PE=4 SV=1	CRIGR	4
	850	646	7.75	7.75	43.72	32.24	32.24	tr|G3H2A5|G3H2A5_CRIGR	Vacuolar protein sorting-associated protein 29 OS=Cricetulus griseus GN=I79_004275 PE=4 SV=1	CRIGR	4
	851	648	7.72	7.72	18.76	9.896	7.25	tr|G3GVY7|G3GVY7_CRIGR	Nardilysin OS=Cricetulus griseus GN=I79_001893 PE=3 SV=1	CRIGR	4
	852	652	7.67	7.67	31.78	19.38	17.05	tr|G3IBK4|G3IBK4_CRIGR	60S ribosomal protein L10 OS=Cricetulus griseus GN=I79_021029 PE=4 SV=1	CRIGR	4
	853	653	7.65	7.65	15.8	10.88	8.031	tr|G3GRX2|G3GRX2_CRIGR	Ubiquitin carboxyl-terminal hydrolase OS=Cricetulus griseus GN=I79_000267 PE=3 SV=1	CRIGR	4
	854	654	7.65	7.65	21.45	19.11	16.78	tr|G3I1D2|G3I1D2_CRIGR	Actin-like protein 6A OS=Cricetulus griseus GN=I79_017185 PE=3 SV=1	CRIGR	4
	855	655	7.64	7.64	28.07	16.14	16.14	tr|G3GR90|G3GR90_CRIGR	Isopentenyl-diphosphate Delta-isomerase 1 OS=Cricetulus griseus GN=I79_000033 PE=4 SV=1	CRIGR	4
	856	658	7.51	7.51	15.39	8.797	7.762	tr|G3IFV3|G3IFV3_CRIGR	Exportin-1 OS=Cricetulus griseus GN=I79_022627 PE=4 SV=1	CRIGR	4
	857	659	7.51	7.51	29.21	25.28	21.07	tr|G3H627|G3H627_CRIGR	Serine/threonine-protein phosphatase (Fragment) OS=Cricetulus griseus GN=I79_005760 PE=3 SV=1	CRIGR	4
	858	659	0	7.51	42.62	36.89	30.74	tr|G3H2D0|G3H2D0_CRIGR	Serine/threonine-protein phosphatase OS=Cricetulus griseus GN=I79_004339 PE=3 SV=1	CRIGR	4
	859	660	7.5	7.54	18	7.413	4.766	tr|G3H1S2|G3H1S2_CRIGR	UDP-glucose:glycoprotein glucosyltransferase 1 OS=Cricetulus griseus GN=I79_004104 PE=4 SV=1	CRIGR	4
	860	661	7.49	7.49	29.77	22.65	15.86	tr|G3GXX4|G3GXX4_CRIGR	Dolichyl-diphosphooligosaccharide--protein glycosyltransferase subunit 2 OS=Cricetulus griseus GN=I79_002619 PE=4 SV=1	CRIGR	4
	861	662	7.46	7.46	34.72	26.39	23.61	tr|G3GVP7|G3GVP7_CRIGR	ADP-sugar pyrophosphatase OS=Cricetulus griseus GN=I79_001795 PE=3 SV=1	CRIGR	4
	862	664	7.43	7.43	81.54	81.54	81.54	tr|G3HAE2|G3HAE2_CRIGR	ATP synthase subunit alpha, mitochondrial OS=Cricetulus griseus GN=I79_007391 PE=4 SV=1	CRIGR	4
	863	665	7.41	7.41	28.3	14.34	10.71	tr|G3IJB9|G3IJB9_CRIGR	UDP-N-acetylhexosamine pyrophosphorylase-like protein 1 OS=Cricetulus griseus GN=I79_023952 PE=4 SV=1	CRIGR	4
	864	666	0	5.28	19.16	12.99	12.99	tr|G3IC16|G3IC16_CRIGR	Cysteine-rich with EGF-like domain protein 2 OS=Cricetulus griseus GN=I79_021203 PE=4 SV=1	CRIGR	4
	865	667	7.4	7.4	22.36	22.36	22.36	tr|G3I9W6|G3I9W6_CRIGR	60S ribosomal protein L29 OS=Cricetulus griseus GN=I79_020377 PE=4 SV=1	CRIGR	4
	866	667	0	7.4	31.58	31.58	31.58	tr|G3H1D7|G3H1D7_CRIGR	60S ribosomal protein L29 OS=Cricetulus griseus GN=I79_003962 PE=4 SV=1	CRIGR	4
	867	668	7.38	7.38	15.6	9.984	8.58	tr|G3IEX0|G3IEX0_CRIGR	Prolyl 3-hydroxylase 1 OS=Cricetulus griseus GN=I79_022275 PE=4 SV=1	CRIGR	4
	868	669	7.36	7.36	18.44	14.1	14.1	tr|G3HHY2|G3HHY2_CRIGR	Peroxisomal multifunctional enzyme type 2 OS=Cricetulus griseus GN=I79_010243 PE=3 SV=1	CRIGR	4
	869	672	7.32	7.32	28.31	28.31	28.31	tr|G3HCH0|G3HCH0_CRIGR	UPF0556 protein C19orf10-like OS=Cricetulus griseus GN=I79_008180 PE=4 SV=1	CRIGR	4
	870	673	7.31	7.31	16.32	12.76	11.63	tr|O55221|O55221_CRIGR	Putative CD98 protein OS=Cricetulus griseus PE=2 SV=1	CRIGR	4
	871	673	0	7.31	16.6	12.98	11.83	tr|G3IHN6|G3IHN6_CRIGR	4F2 cell-surface antigen heavy chain OS=Cricetulus griseus GN=I79_023340 PE=4 SV=1	CRIGR	4
	872	674	7.3	7.3	22.57	8.886	6.347	tr|G3HRJ1|G3HRJ1_CRIGR	FACT complex subunit SSRP1 OS=Cricetulus griseus GN=I79_013463 PE=4 SV=1	CRIGR	4
	873	676	7.3	7.3	33.04	25.55	21.59	tr|G3HSZ4|G3HSZ4_CRIGR	Splicing factor, arginine/serine-rich 7 (Fragment) OS=Cricetulus griseus GN=I79_013994 PE=4 SV=1	CRIGR	4
	874	679	7.24	7.24	24.75	19.06	19.06	tr|G3IHQ6|G3IHQ6_CRIGR	3-mercaptopyruvate sulfurtransferase OS=Cricetulus griseus GN=I79_023361 PE=4 SV=1	CRIGR	4
	875	680	7.23	7.23	44.44	32.41	21.3	tr|G3HLW5|G3HLW5_CRIGR	Ras-related protein Rab-5C OS=Cricetulus griseus GN=I79_011709 PE=3 SV=1	CRIGR	4
	876	681	7.23	7.23	19.1	19.1	17.24	tr|G3HTX6|G3HTX6_CRIGR	Phosphoribosyl pyrophosphate synthetase-associated protein 1 OS=Cricetulus griseus GN=I79_014356 PE=4 SV=1	CRIGR	4
	877	682	7.21	7.21	34.19	34.19	34.19	tr|G3IIH3|G3IIH3_CRIGR	Eukaryotic translation initiation factor 4E OS=Cricetulus griseus GN=I79_023644 PE=3 SV=1	CRIGR	4
	878	683	7.2	7.2	32.45	21.85	18.54	tr|G3HM24|G3HM24_CRIGR	Serine/threonine-protein kinase Nek7 OS=Cricetulus griseus GN=I79_011769 PE=4 SV=1	CRIGR	4
	879	685	7.18	7.18	39.51	35.12	35.12	tr|G3HG69|G3HG69_CRIGR	Hepatoma-derived growth factor OS=Cricetulus griseus GN=I79_009588 PE=4 SV=1	CRIGR	4
	880	686	7.17	7.17	43.77	27.95	27.95	tr|G3I1P6|G3I1P6_CRIGR	Nucleosome-binding protein 1 OS=Cricetulus griseus GN=I79_017309 PE=4 SV=1	CRIGR	4
	881	689	7.12	7.12	24.88	11.69	11.69	tr|G3HW48|G3HW48_CRIGR	Dynactin subunit 2 OS=Cricetulus griseus GN=I79_015196 PE=4 SV=1	CRIGR	4
	882	692	7.04	7.04	21.26	10.43	10.43	tr|G3HDQ1|G3HDQ1_CRIGR	UTP--glucose-1-phosphate uridylyltransferase OS=Cricetulus griseus GN=I79_008637 PE=4 SV=1	CRIGR	4
	883	692	0	7.04	21.26	10.43	10.43	sp|O35156|UGPA_CRIGR	UTP--glucose-1-phosphate uridylyltransferase OS=Cricetulus griseus GN=UGP2 PE=2 SV=3	CRIGR	4
	884	693	7.02	7.02	48.21	48.21	48.21	tr|G3H9C9|G3H9C9_CRIGR	Transcription elongation factor B polypeptide 1 OS=Cricetulus griseus GN=I79_006997 PE=4 SV=1	CRIGR	4
	885	695	6.98	6.98	15.17	8.824	8.824	tr|G3H2H5|G3H2H5_CRIGR	Dihydrolipoyllysine-residue acetyltransferase component of pyruvate dehydrogenase complex, mitochondrial OS=Cricetulus griseus GN=I79_004388 PE=3 SV=1	CRIGR	4
	886	697	6.93	6.93	10.57	8.679	8.679	tr|G3IJF2|G3IJF2_CRIGR	Nuclear fragile X mental retardation-interacting protein 2 OS=Cricetulus griseus GN=I79_023986 PE=4 SV=1	CRIGR	4
	887	698	6.93	6.93	81.82	81.82	81.82	tr|G3GYC6|G3GYC6_CRIGR	Profilin-1 OS=Cricetulus griseus GN=I79_002801 PE=4 SV=1	CRIGR	4
	888	699	6.92	6.92	38.55	24	19.64	tr|G3HH11|G3HH11_CRIGR	N-acylneuraminate cytidylyltransferase OS=Cricetulus griseus GN=I79_009906 PE=4 SV=1	CRIGR	4
	889	700	6.91	6.91	14.76	7.642	7.642	tr|G3HX69|G3HX69_CRIGR	LIM domain and actin-binding protein 1 OS=Cricetulus griseus GN=I79_015588 PE=4 SV=1	CRIGR	4
	890	701	6.89	6.89	34.97	30.07	23.78	tr|G3HIY3|G3HIY3_CRIGR	40S ribosomal protein S23 OS=Cricetulus griseus GN=I79_010614 PE=3 SV=1	CRIGR	4
	891	703	6.85	6.85	33.33	33.33	24.32	tr|G3HZ28|G3HZ28_CRIGR	Twisted gastrulation protein-like 1 OS=Cricetulus griseus GN=I79_016323 PE=4 SV=1	CRIGR	4
	892	704	6.81	6.81	30.13	22.76	20.83	tr|G3IKQ5|G3IKQ5_CRIGR	Pyridoxal kinase OS=Cricetulus griseus GN=I79_024458 PE=4 SV=1	CRIGR	4
	893	706	6.8	6.8	40.98	30.05	30.05	tr|Q6E6J8|Q6E6J8_CRIGR	Heterochromatin protein 1 gamma OS=Cricetulus griseus PE=2 SV=1	CRIGR	4
	894	709	6.77	6.77	56.69	56.69	35.43	tr|G3HKX2|G3HKX2_CRIGR	Nuclear transport factor 2 OS=Cricetulus griseus GN=I79_011354 PE=4 SV=1	CRIGR	4
	895	712	6.73	6.73	89.29	79.76	55.95	tr|G3H319|G3H319_CRIGR	Tubulin-specific chaperone A OS=Cricetulus griseus GN=I79_004625 PE=4 SV=1	CRIGR	4
	896	713	6.7	6.7	37.85	27.12	27.12	tr|G3HID6|G3HID6_CRIGR	Cellular nucleic acid-binding protein OS=Cricetulus griseus GN=I79_010397 PE=4 SV=1	CRIGR	4
	897	713	0	6.7	40.85	29.27	29.27	tr|A9XHW5|A9XHW5_CRIGR	CCHC-type zinc finger (Fragment) OS=Cricetulus griseus GN=CCHC PE=2 SV=1	CRIGR	4
	898	714	6.69	6.69	26.61	16.82	16.82	tr|G3H6T8|G3H6T8_CRIGR	Vacuolar protein sorting-associated protein 26A OS=Cricetulus griseus GN=I79_006057 PE=4 SV=1	CRIGR	4
	899	716	6.65	6.65	30.71	23.62	20.87	tr|G3HLZ2|G3HLZ2_CRIGR	Proteasome activator complex subunit 3 OS=Cricetulus griseus GN=I79_011736 PE=4 SV=1	CRIGR	4
	900	718	6.63	6.63	14.39	6.944	6.944	tr|G3I3B7|G3I3B7_CRIGR	Ribonucleoside-diphosphate reductase OS=Cricetulus griseus GN=I79_017921 PE=3 SV=1	CRIGR	4
	901	726	6.49	6.49	46.46	28.79	25.25	sp|P05044|SORCN_CRIGR	Sorcin OS=Cricetulus griseus GN=SRI PE=1 SV=1	CRIGR	4
	902	727	6.45	6.45	27.72	13.14	11.09	tr|G3HTF7|G3HTF7_CRIGR	Myosin-Ic OS=Cricetulus griseus GN=I79_014182 PE=4 SV=1	CRIGR	4
	903	728	6.44	6.44	27.58	19.09	19.09	tr|G3I3Z1|G3I3Z1_CRIGR	AH receptor-interacting protein OS=Cricetulus griseus GN=I79_018162 PE=4 SV=1	CRIGR	4
	904	733	6.41	6.41	27.64	27.64	27.64	tr|G3I5W2|G3I5W2_CRIGR	TAR DNA-binding protein 43 OS=Cricetulus griseus GN=I79_018870 PE=4 SV=1	CRIGR	4
	905	737	6.37	6.37	31.64	28.81	17.51	tr|G3GTH2|G3GTH2_CRIGR	Na(+)/H(+) exchange regulatory cofactor NHE-RF1 OS=Cricetulus griseus GN=I79_000956 PE=1 SV=1	CRIGR	4
	906	740	6.37	6.37	41.09	41.09	41.09	tr|G3HPE8|G3HPE8_CRIGR	Vasodilator-stimulated phosphoprotein OS=Cricetulus griseus GN=I79_012660 PE=4 SV=1	CRIGR	4
	907	742	6.35	6.35	59.05	39.05	39.05	tr|G3HET8|G3HET8_CRIGR	Ubiquitin-conjugating enzyme E2 variant 1 OS=Cricetulus griseus GN=I79_009086 PE=4 SV=1	CRIGR	4
	908	745	6.28	6.28	29.67	18.96	13.19	tr|G3GVH4|G3GVH4_CRIGR	Developmentally-regulated GTP-binding protein 2 OS=Cricetulus griseus GN=I79_001712 PE=4 SV=1	CRIGR	4
	909	751	6.22	6.22	24.79	10.5	5.617	tr|G3I6K0|G3I6K0_CRIGR	Putative ATP-dependent RNA helicase DDX23 OS=Cricetulus griseus GN=I79_019124 PE=4 SV=1	CRIGR	4
	910	768	6.05	8	28.29	16.1	16.1	tr|G3I7D7|G3I7D7_CRIGR	RNA-binding protein FUS OS=Cricetulus griseus GN=I79_019424 PE=4 SV=1	CRIGR	4
	911	773	6.04	6.04	20.62	16.49	16.49	tr|G3I501|G3I501_CRIGR	Histone H1.0 OS=Cricetulus griseus GN=I79_018542 PE=3 SV=1	CRIGR	4
	912	774	6.04	6.04	35.05	31.96	31.96	tr|G3HUU7|G3HUU7_CRIGR	Protein S100-A10 OS=Cricetulus griseus GN=I79_014715 PE=4 SV=1	CRIGR	4
	913	776	6.03	6.03	84	77	77	tr|G3H3S4|G3H3S4_CRIGR	Protein-L-isoaspartate O-methyltransferase OS=Cricetulus griseus GN=I79_004908 PE=3 SV=1	CRIGR	4
	914	777	6.02	6.02	34.72	34.72	28.47	tr|G3HAJ9|G3HAJ9_CRIGR	Coiled-coil domain-containing protein 58 OS=Cricetulus griseus GN=I79_007455 PE=4 SV=1	CRIGR	4
	915	785	6	6	19.35	10.97	10.97	tr|G3IEY5|G3IEY5_CRIGR	Dynamin-1-like protein OS=Cricetulus griseus GN=I79_022295 PE=4 SV=1	CRIGR	4
	916	793	5.98	6	27.86	23.88	23.88	tr|G3I7L9|G3I7L9_CRIGR	Eukaryotic translation initiation factor 3 subunit C OS=Cricetulus griseus GN=I79_019512 PE=4 SV=1	CRIGR	4
	917	795	5.96	5.96	20.53	10.4	10.4	tr|G3HC39|G3HC39_CRIGR	Farnesyl pyrophosphate synthetase OS=Cricetulus griseus GN=I79_007989 PE=3 SV=1	CRIGR	4
	918	801	5.86	5.86	26.02	15.42	11.33	tr|G3H6Z8|G3H6Z8_CRIGR	Adipocyte plasma membrane-associated protein OS=Cricetulus griseus GN=I79_006122 PE=4 SV=1	CRIGR	4
	919	802	5.86	5.86	39.47	39.47	24.34	tr|G3H375|G3H375_CRIGR	Eukaryotic translation initiation factor 5 OS=Cricetulus griseus GN=I79_004688 PE=4 SV=1	CRIGR	4
	920	803	5.86	5.86	24.09	24.09	24.09	tr|G3IH79|G3IH79_CRIGR	60S ribosomal protein L34 OS=Cricetulus griseus GN=I79_023163 PE=4 SV=1	CRIGR	4
	921	808	5.78	5.78	17.4	9.605	6.667	tr|G3H6B2|G3H6B2_CRIGR	Dynamin OS=Cricetulus griseus GN=I79_005867 PE=3 SV=1	CRIGR	4
	922	819	5.66	5.66	44.83	44.83	44.83	tr|G3HC03|G3HC03_CRIGR	40S ribosomal protein S27 OS=Cricetulus griseus GN=I79_008044 PE=4 SV=1	CRIGR	4
	923	822	5.61	5.61	24.48	17.31	13.13	tr|G3IHE8|G3IHE8_CRIGR	Leucine-rich repeat-containing protein 47 OS=Cricetulus griseus GN=I79_023237 PE=4 SV=1	CRIGR	4
	924	824	5.57	5.6	18.97	9.915	9.915	tr|G3HC77|G3HC77_CRIGR	Cell division cycle 5-related protein OS=Cricetulus griseus GN=I79_008082 PE=4 SV=1	CRIGR	4
	925	825	5.57	5.57	13.86	9.143	9.143	tr|G3HK76|G3HK76_CRIGR	LETM1 and EF-hand domain-containing protein 1, mitochondrial (Fragment) OS=Cricetulus griseus GN=I79_011094 PE=4 SV=1	CRIGR	4
	926	827	5.53	5.53	16.63	10.28	5.932	tr|G3HJD9|G3HJD9_CRIGR	Transcription elongation factor SPT5 OS=Cricetulus griseus GN=I79_010783 PE=4 SV=1	CRIGR	4
	927	828	5.52	5.52	21	21	21	tr|G3HUU6|G3HUU6_CRIGR	Protein S100-A11 OS=Cricetulus griseus GN=I79_014714 PE=4 SV=1	CRIGR	4
	928	832	5.47	6.79	17.46	14.51	9.751	tr|G3I346|G3I346_CRIGR	U4/U6 small nuclear ribonucleoprotein Prp31 OS=Cricetulus griseus GN=I79_017847 PE=4 SV=1	CRIGR	4
	929	834	5.46	5.46	18.86	11.97	10.34	tr|G3GYZ1|G3GYZ1_CRIGR	CD44 antigen OS=Cricetulus griseus GN=I79_003042 PE=4 SV=1	CRIGR	4
	930	844	5.4	5.4	31.17	23.38	19.48	tr|G3H162|G3H162_CRIGR	Transmembrane emp24 domain-containing protein 9 OS=Cricetulus griseus GN=I79_003886 PE=3 SV=1	CRIGR	4
	931	852	5.33	5.33	23.32	20.38	17.43	tr|G3HSV9|G3HSV9_CRIGR	Host cell factor OS=Cricetulus griseus GN=I79_013957 PE=4 SV=1	CRIGR	4
	932	855	5.3	5.3	14.44	6.952	6.952	tr|G3I486|G3I486_CRIGR	Heterochromatin protein 1-binding protein 3 OS=Cricetulus griseus GN=I79_018263 PE=3 SV=1	CRIGR	4
	933	861	5.24	5.24	22.12	12.13	6.064	tr|G3IGS8|G3IGS8_CRIGR	Serrate RNA effector molecule-like OS=Cricetulus griseus GN=I79_023004 PE=4 SV=1	CRIGR	4
	934	862	5.23	5.23	47.18	34.51	28.87	tr|G3GRX4|G3GRX4_CRIGR	Coactosin-like protein OS=Cricetulus griseus GN=I79_000269 PE=4 SV=1	CRIGR	4
	935	887	4.85	6.25	18.91	13.88	12.47	tr|G3H8Q6|G3H8Q6_CRIGR	Importin subunit alpha OS=Cricetulus griseus GN=I79_006766 PE=3 SV=1	CRIGR	4
	936	889	4.79	4.79	16.79	6.282	5	tr|G3HIK1|G3HIK1_CRIGR	Nuclear pore complex protein Nup93 OS=Cricetulus griseus GN=I79_010472 PE=4 SV=1	CRIGR	4
	937	897	4.69	4.69	36.36	23.55	17.77	tr|G3GVN0|G3GVN0_CRIGR	Phosphomannomutase 2 OS=Cricetulus griseus GN=I79_001774 PE=4 SV=1	CRIGR	4
	938	933	4.26	4.41	10.11	3.915	2.936	tr|G3I5Z8|G3I5Z8_CRIGR	Proteasome-associated protein ECM29-like OS=Cricetulus griseus GN=I79_018909 PE=4 SV=1	CRIGR	4
	939	952	4.1	6.13	18.93	13.83	11.65	tr|G3GVI3|G3GVI3_CRIGR	Serine hydroxymethyltransferase OS=Cricetulus griseus GN=I79_001722 PE=3 SV=1	CRIGR	4
	940	974	4.02	6.02	37.84	29.73	29.73	tr|G3I4C8|G3I4C8_CRIGR	60S ribosomal protein L18 OS=Cricetulus griseus GN=I79_018305 PE=3 SV=1	CRIGR	4
	941	991	0	7.71	32.31	32.31	28.82	tr|G3INP0|G3INP0_CRIGR	Spliceosome RNA helicase Bat1 OS=Cricetulus griseus GN=I79_025570 PE=4 SV=1	CRIGR	4
	942	992	4	6.95	48.63	42.47	42.47	tr|G3I072|G3I072_CRIGR	Elongation factor 1-gamma OS=Cricetulus griseus GN=I79_016749 PE=4 SV=1	CRIGR	4
	943	994	0	5.03	48.33	36.67	36.67	tr|G3HSB4|G3HSB4_CRIGR	60S ribosomal protein L27 OS=Cricetulus griseus GN=I79_013744 PE=4 SV=1	CRIGR	4
	944	1103	0	6.82	26.24	17.82	17.82	tr|G3H0N4|G3H0N4_CRIGR	60S ribosomal protein L7a OS=Cricetulus griseus GN=I79_003698 PE=4 SV=1	CRIGR	4
	945	1126	2.94	2.94	5.971	1.714	1.419	tr|G3HGW6|G3HGW6_CRIGR	Laminin subunit alpha-5 OS=Cricetulus griseus GN=I79_009858 PE=4 SV=1	CRIGR	4
	946	1198	2.43	4.78	13.12	7.921	7.921	tr|G3GZ72|G3GZ72_CRIGR	Coatomer subunit gamma OS=Cricetulus griseus GN=I79_003155 PE=3 SV=1	CRIGR	4
	947	1319	0	8.21	32.85	32.85	32.85	tr|G3HMP4|G3HMP4_CRIGR	60S ribosomal protein L7a OS=Cricetulus griseus GN=I79_012015 PE=4 SV=1	CRIGR	4
	948	1339	2.01	7.23	33.33	17.67	12.45	tr|G3HMJ8|G3HMJ8_CRIGR	60S ribosomal protein L7 OS=Cricetulus griseus GN=I79_011961 PE=4 SV=1	CRIGR	4
	949	1364	2	4.92	29.46	29.46	29.46	tr|G3GTK2|G3GTK2_CRIGR	60S ribosomal protein L12 OS=Cricetulus griseus GN=I79_000987 PE=4 SV=1	CRIGR	4
	950	1525	1.48	5.77	51.9	51.9	22.15	tr|G3H511|G3H511_CRIGR	Tropomyosin alpha-1 chain OS=Cricetulus griseus GN=I79_005379 PE=3 SV=1	CRIGR	4
	951	1683	0.83	5.94	33.9	33.9	33.9	tr|G3GV69|G3GV69_CRIGR	Cytochrome c OS=Cricetulus griseus GN=I79_001600 PE=3 SV=1	CRIGR	4
	952	889	4.79	4.79	16.79	6.282	5	tr|G3HIK1|G3HIK1_CRIGR	Nuclear pore complex protein Nup93 OS=Cricetulus griseus GN=I79_010472 PE=4 SV=1	CRIGR	4
	953	1768	0.61	2.72	16.15	15.38	15.38	tr|G3I078|G3I078_CRIGR	60S ribosomal protein L30 OS=Cricetulus griseus GN=I79_016755 PE=4 SV=1	CRIGR	4
	954	1830	0.48	7.38	60.61	49.24	35.61	tr|G3HMG1|G3HMG1_CRIGR	40S ribosomal protein S13 OS=Cricetulus griseus GN=I79_011923 PE=4 SV=1	CRIGR	4
	955	844	5.4	5.4	31.17	23.38	19.48	tr|G3H162|G3H162_CRIGR	Transmembrane emp24 domain-containing protein 9 OS=Cricetulus griseus GN=I79_003886 PE=3 SV=1	CRIGR	4
	956	695	6.98	6.98	15.17	8.824	8.824	tr|G3H2H5|G3H2H5_CRIGR	Dihydrolipoyllysine-residue acetyltransferase component of pyruvate dehydrogenase complex, mitochondrial OS=Cricetulus griseus GN=I79_004388 PE=3 SV=1	CRIGR	4
	957	933	4.26	4.41	10.11	3.915	2.936	tr|G3I5Z8|G3I5Z8_CRIGR	Proteasome-associated protein ECM29-like OS=Cricetulus griseus GN=I79_018909 PE=4 SV=1	CRIGR	4
	958	578	8.61	8.67	12.38	4.715	2.953	tr|G3GUN0|G3GUN0_CRIGR	Chromodomain-helicase-DNA-binding protein 4 OS=Cricetulus griseus GN=I79_001396 PE=4 SV=1	CRIGR	4
	959	655	7.64	7.64	28.07	16.14	16.14	tr|G3GR90|G3GR90_CRIGR	Isopentenyl-diphosphate Delta-isomerase 1 OS=Cricetulus griseus GN=I79_000033 PE=4 SV=1	CRIGR	4
	960	652	7.67	7.67	31.78	19.38	17.05	tr|G3IBK4|G3IBK4_CRIGR	60S ribosomal protein L10 OS=Cricetulus griseus GN=I79_021029 PE=4 SV=1	CRIGR	4
	961	2469	0.09	7.46	11.22	6.114	4.858	tr|G3H7Y5|G3H7Y5_CRIGR	Sodium/potassium-transporting ATPase subunit alpha-2 OS=Cricetulus griseus GN=I79_006481 PE=3 SV=1	CRIGR	4
	962	570	0	6.35	24.38	10.69	5.867	sp|Q07050|TOP1_CRIGR	DNA topoisomerase 1 OS=Cricetulus griseus GN=TOP1 PE=2 SV=1	CRIGR	4
	963	2469	0.09	7.46	11.22	6.114	4.858	tr|G3H7Y5|G3H7Y5_CRIGR	Sodium/potassium-transporting ATPase subunit alpha-2 OS=Cricetulus griseus GN=I79_006481 PE=3 SV=1	CRIGR	4
	964	601	8.21	8.21	76.27	74.58	50.85	tr|G3HIQ3|G3HIQ3_CRIGR	Activated RNA polymerase II transcriptional coactivator p15 OS=Cricetulus griseus GN=I79_010528 PE=4 SV=1	CRIGR	4
	965	656	7.57	7.57	25.67	19.73	7.088	tr|G3I6H3|G3I6H3_CRIGR	Splicing factor 1 OS=Cricetulus griseus GN=I79_019082 PE=4 SV=1	CRIGR	3
	966	657	7.51	7.51	17.5	8.465	4.304	tr|G3H3B1|G3H3B1_CRIGR	Metastasis-associated protein MTA1 OS=Cricetulus griseus GN=I79_004726 PE=4 SV=1	CRIGR	3
	967	659	0	5.32	34.65	21.45	16.5	tr|G3HZP8|G3HZP8_CRIGR	Serine/threonine-protein phosphatase (Fragment) OS=Cricetulus griseus GN=I79_016554 PE=3 SV=1	CRIGR	3
	968	682	0	5	22.22	22.22	22.22	tr|G3IAB9|G3IAB9_CRIGR	Eukaryotic translation initiation factor 4E OS=Cricetulus griseus GN=I79_020539 PE=3 SV=1	CRIGR	3
	969	688	7.14	7.14	39.49	27.54	18.12	tr|G3HMN4|G3HMN4_CRIGR	Omega-amidase NIT2 OS=Cricetulus griseus GN=I79_012003 PE=4 SV=1	CRIGR	3
	970	694	6.99	7.2	18.45	13.21	7.517	tr|G3GYJ1|G3GYJ1_CRIGR	Rho GTPase-activating protein 1 OS=Cricetulus griseus GN=I79_002870 PE=4 SV=1	CRIGR	3
	971	702	6.86	6.86	21.69	21.69	12.35	tr|G3HPZ2|G3HPZ2_CRIGR	S-adenosylmethionine synthase OS=Cricetulus griseus GN=I79_012879 PE=3 SV=1	CRIGR	3
	972	706	0	6	25.13	21.47	21.47	tr|G3H2J7|G3H2J7_CRIGR	Chromobox protein-like 3 OS=Cricetulus griseus GN=I79_004410 PE=4 SV=1	CRIGR	3
	973	707	6.77	6.77	45.53	22.76	17.07	tr|G3I979|G3I979_CRIGR	40S ribosomal protein S25 (Fragment) OS=Cricetulus griseus GN=I79_020113 PE=4 SV=1	CRIGR	3
	974	707	0	6.7	36.29	22.58	16.94	tr|G3I364|G3I364_CRIGR	40S ribosomal protein S25 OS=Cricetulus griseus GN=I79_017865 PE=4 SV=1	CRIGR	3
	975	708	6.77	6.77	26.32	19.65	14.39	tr|G3HAE3|G3HAE3_CRIGR	ATP synthase subunit alpha, mitochondrial OS=Cricetulus griseus GN=I79_007392 PE=3 SV=1	CRIGR	3
	976	711	6.74	6.74	31.71	28.46	19.11	tr|G3GZA9|G3GZA9_CRIGR	Reticulocalbin-1 (Fragment) OS=Cricetulus griseus GN=I79_003169 PE=4 SV=1	CRIGR	3
	977	715	6.66	6.66	19.47	13.53	6.931	tr|G3H8W6|G3H8W6_CRIGR	Autoimmune regulator OS=Cricetulus griseus GN=I79_006854 PE=4 SV=1	CRIGR	3
	978	717	6.64	6.64	29.55	29.55	23.86	tr|G3HSA7|G3HSA7_CRIGR	Thioredoxin domain-containing protein 17 OS=Cricetulus griseus GN=I79_013736 PE=4 SV=1	CRIGR	3
	979	719	6.6	6.6	16.2	15.97	12.5	tr|G3GUB2|G3GUB2_CRIGR	Cytoplasmic dynein 1 intermediate chain 2 (Fragment) OS=Cricetulus griseus GN=I79_001266 PE=4 SV=1	CRIGR	3
	980	720	6.59	6.59	40.21	34.39	24.34	tr|G3H5G6|G3H5G6_CRIGR	Thioredoxin-like protein 1 OS=Cricetulus griseus GN=I79_005547 PE=4 SV=1	CRIGR	3
	981	721	6.57	6.57	17.37	4.049	2.098	tr|G3I7W5|G3I7W5_CRIGR	Myosin-XVIIIa OS=Cricetulus griseus GN=I79_019614 PE=4 SV=1	CRIGR	3
	982	722	6.57	6.57	23.74	16.04	13.85	tr|G3HNG2|G3HNG2_CRIGR	Acyl-coenzyme A thioesterase 2, mitochondrial OS=Cricetulus griseus GN=I79_012300 PE=4 SV=1	CRIGR	3
	983	723	6.52	6.52	57.14	57.14	47.25	tr|G3IA72|G3IA72_CRIGR	Profilin-2 OS=Cricetulus griseus GN=I79_020488 PE=4 SV=1	CRIGR	3
	984	726	0	4.77	78.63	31.62	25.64	tr|G3HRX0|G3HRX0_CRIGR	Sorcin (Fragment) OS=Cricetulus griseus GN=I79_013594 PE=4 SV=1	CRIGR	3
	985	729	6.44	6.44	35	26.88	23.13	tr|G3H1V1|G3H1V1_CRIGR	60S ribosomal protein L21 OS=Cricetulus griseus GN=I79_004135 PE=4 SV=1	CRIGR	3
	986	731	6.43	6.43	13.9	8.96	3.502	tr|G3HES3|G3HES3_CRIGR	Exportin-2 OS=Cricetulus griseus GN=I79_009067 PE=4 SV=1	CRIGR	3
	987	732	6.41	6.41	15.5	10.38	7.164	tr|G3IIT6|G3IIT6_CRIGR	Cysteinyl-tRNA synthetase, cytoplasmic OS=Cricetulus griseus GN=I79_023763 PE=4 SV=1	CRIGR	3
	988	734	6.4	6.4	14.58	4.353	4.353	tr|G3I198|G3I198_CRIGR	Rab effector MyRIP OS=Cricetulus griseus GN=I79_017149 PE=4 SV=1	CRIGR	3
	989	734	0	6.39	36.28	35.4	35.4	tr|G3HLU5|G3HLU5_CRIGR	Eukaryotic translation initiation factor 1 OS=Cricetulus griseus GN=I79_011689 PE=4 SV=1	CRIGR	3
	990	735	6.39	6.39	29.04	14.72	7.157	tr|G3HLV8|G3HLV8_CRIGR	DnaJ-like subfamily C member 7 OS=Cricetulus griseus GN=I79_011702 PE=4 SV=1	CRIGR	3
	991	736	6.38	6.38	34.21	34.21	27.89	tr|G3HB42|G3HB42_CRIGR	Heme-binding protein 1 OS=Cricetulus griseus GN=I79_007657 PE=4 SV=1	CRIGR	3
	992	741	6.36	6.36	14.87	11.21	9.153	tr|G3HF38|G3HF38_CRIGR	Basigin OS=Cricetulus griseus GN=I79_009191 PE=4 SV=1	CRIGR	3
	993	741	0	6.36	21.69	19.68	16.06	sp|Q99PA3|BASI_CRIGR	Basigin (Fragment) OS=Cricetulus griseus GN=BSG PE=2 SV=1	CRIGR	3
	994	743	6.31	6.31	33.33	25.68	22.52	tr|G3HLP4|G3HLP4_CRIGR	Eukaryotic translation initiation factor 4H OS=Cricetulus griseus GN=I79_011635 PE=4 SV=1	CRIGR	3
	995	746	6.28	6.28	45.52	34.33	27.61	tr|G3HJT6|G3HJT6_CRIGR	60S ribosomal protein L32 OS=Cricetulus griseus GN=I79_010938 PE=4 SV=1	CRIGR	3
	996	747	6.26	6.26	29.54	20.92	11.08	tr|G3HJ13|G3HJ13_CRIGR	LIM and senescent cell antigen-like-containing domain protein 1 OS=Cricetulus griseus GN=I79_010647 PE=4 SV=1	CRIGR	3
	997	748	6.26	6.26	13.65	8.914	5.989	tr|G3HH02|G3HH02_CRIGR	Uncharacterized protein C20orf135-like OS=Cricetulus griseus GN=I79_009897 PE=4 SV=1	CRIGR	3
	998	749	6.24	6.24	36.78	17.44	13.08	tr|G3GSM1|G3GSM1_CRIGR	Choline-phosphate cytidylyltransferase A OS=Cricetulus griseus GN=I79_000638 PE=4 SV=1	CRIGR	3
	999	749	0	6.13	35.97	17.44	13.08	sp|P49584|PCY1A_CRIGR	Choline-phosphate cytidylyltransferase A OS=Cricetulus griseus GN=PCYT1A PE=2 SV=1	CRIGR	3
	1000	750	6.24	6.24	18.75	18.75	18.75	tr|G3IH46|G3IH46_CRIGR	Prothymosin alpha OS=Cricetulus griseus GN=I79_023127 PE=4 SV=1	CRIGR	3
	1001	752	6.22	6.22	42.93	26.63	20.65	tr|G3GY22|G3GY22_CRIGR	Ras-related protein Rap-1b OS=Cricetulus griseus GN=I79_002677 PE=4 SV=1	CRIGR	3
	1002	753	6.17	6.2	42.75	42.75	26.09	tr|G3H3H6|G3H3H6_CRIGR	ADP-ribosylation factor-like protein 8A OS=Cricetulus griseus GN=I79_004823 PE=4 SV=1	CRIGR	3
	1003	754	6.16	6.16	14.2	11	8.8	tr|G3GY31|G3GY31_CRIGR	Cleavage and polyadenylation specificity factor subunit 6 OS=Cricetulus griseus GN=I79_002686 PE=4 SV=1	CRIGR	3
	1004	756	6.14	6.14	45.92	21.94	21.94	tr|G3HNA5|G3HNA5_CRIGR	Ubiquitin carboxyl-terminal hydrolase isozyme L3 (Fragment) OS=Cricetulus griseus GN=I79_012242 PE=4 SV=1	CRIGR	3
	1005	758	6.09	6.09	12.29	10.59	8.507	tr|G3HCT1|G3HCT1_CRIGR	Importin subunit alpha OS=Cricetulus griseus GN=I79_008297 PE=3 SV=1	CRIGR	3
	1006	759	6.09	6.09	14.1	14.1	9.744	tr|G3I2K8|G3I2K8_CRIGR	Ribonucleoside-diphosphate reductase subunit M2 OS=Cricetulus griseus GN=I79_017646 PE=4 SV=1	CRIGR	3
	1007	760	6.08	6.08	22.29	10.45	7.495	tr|G3GWP7|G3GWP7_CRIGR	Calcium/calmodulin-dependent protein kinase type II gamma chain OS=Cricetulus griseus GN=I79_002177 PE=4 SV=1	CRIGR	3
	1008	761	6.08	6.08	28.92	15.68	15.68	tr|G3HBE9|G3HBE9_CRIGR	Leucine-rich repeat-containing protein 59 OS=Cricetulus griseus GN=I79_007777 PE=4 SV=1	CRIGR	3
	1009	762	6.08	6.08	52.04	33.67	33.67	tr|G3I596|G3I596_CRIGR	Histidyl-tRNA synthetase, cytoplasmic OS=Cricetulus griseus GN=I79_018640 PE=4 SV=1	CRIGR	3
	1010	763	6.07	6.1	12.46	4.348	4.348	tr|G3HHX7|G3HHX7_CRIGR	Superkiller viralicidic activity 2-like 2 OS=Cricetulus griseus GN=I79_010238 PE=4 SV=1	CRIGR	3
	1011	764	6.07	6.07	30.63	30.63	30.63	tr|G3I100|G3I100_CRIGR	60S ribosomal protein L27 OS=Cricetulus griseus GN=I79_017043 PE=4 SV=1	CRIGR	3
	1012	765	6.07	6.07	26.58	26.58	20.25	tr|G3IFT9|G3IFT9_CRIGR	Actin-related protein 2 OS=Cricetulus griseus GN=I79_022612 PE=4 SV=1	CRIGR	3
	1013	767	6.06	6.06	13.19	8.132	8.132	tr|G3H1D5|G3H1D5_CRIGR	Retinoid-inducible serine carboxypeptidase OS=Cricetulus griseus GN=I79_003960 PE=4 SV=1	CRIGR	3
	1014	769	6.05	6.05	41.63	23.92	23.92	tr|G3IP86|G3IP86_CRIGR	Replication protein A 70 kDa DNA-binding subunit OS=Cricetulus griseus GN=I79_025790 PE=4 SV=1	CRIGR	3
	1015	770	6.05	6.05	20.18	13.16	13.16	tr|G3HSZ6|G3HSZ6_CRIGR	Aldose 1-epimerase OS=Cricetulus griseus GN=I79_013996 PE=3 SV=1	CRIGR	3
	1016	771	6.04	6.1	25.99	14.54	14.54	tr|G3GXN1|G3GXN1_CRIGR	GTP-binding nuclear protein Ran OS=Cricetulus griseus GN=I79_002522 PE=4 SV=1	CRIGR	3
	1017	772	6.04	6.04	23.33	16.19	16.19	tr|G3HDB3|G3HDB3_CRIGR	Splicing factor, arginine/serine-rich 6 OS=Cricetulus griseus GN=I79_008493 PE=4 SV=1	CRIGR	3
	1018	775	6.03	6.03	11.54	8.718	8.718	tr|G3H5K6|G3H5K6_CRIGR	Pyruvate dehydrogenase E1 component subunit alpha, somatic form, mitochondrial OS=Cricetulus griseus GN=PDH-A1 PE=2 SV=1	CRIGR	3
	1019	780	6.01	6.01	22.04	19.59	19.59	tr|G3HSX3|G3HSX3_CRIGR	B-cell receptor-associated protein 31 OS=Cricetulus griseus GN=I79_013972 PE=4 SV=1	CRIGR	3
	1020	781	6.01	6.01	18.01	13.98	13.98	tr|G3GX44|G3GX44_CRIGR	Protein SEC13-like OS=Cricetulus griseus GN=I79_002356 PE=4 SV=1	CRIGR	3
	1021	784	6	6	25.32	22.4	14.29	tr|G3HFQ4|G3HFQ4_CRIGR	Dihydrolipoyllysine-residue succinyltransferase component of 2-oxoglutarate dehydrogenase complex, mitochondrial OS=Cricetulus griseus GN=I79_009418 PE=3 SV=1	CRIGR	3
	1022	786	6	6	28.05	18.29	18.29	tr|G3I196|G3I196_CRIGR	60S ribosomal protein L14 OS=Cricetulus griseus GN=I79_017147 PE=4 SV=1	CRIGR	3
	1023	787	6	6	15	9.118	9.118	tr|G3HD21|G3HD21_CRIGR	DnaJ-like subfamily B member 1 OS=Cricetulus griseus GN=I79_008394 PE=4 SV=1	CRIGR	3
	1024	788	6	6	21.81	18.52	18.52	tr|G3I2S4|G3I2S4_CRIGR	3,2-trans-enoyl-CoA isomerase, mitochondrial OS=Cricetulus griseus GN=I79_017718 PE=3 SV=1	CRIGR	3
	1025	789	6	6	59.26	40.74	40.74	tr|G3HDD4|G3HDD4_CRIGR	NEDD8 OS=Cricetulus griseus GN=I79_008538 PE=4 SV=1	CRIGR	3
	1026	791	6	6	66	66	66	tr|G3H601|G3H601_CRIGR	Mitochondrial import inner membrane translocase subunit Tim8 A OS=Cricetulus griseus GN=I79_005750 PE=4 SV=1	CRIGR	3
	1027	792	6	6	14.18	14.18	14.18	tr|G3H1W2|G3H1W2_CRIGR	Peflin OS=Cricetulus griseus GN=I79_004148 PE=4 SV=1	CRIGR	3
	1028	794	5.97	5.97	20.41	8.243	5.405	tr|G3ILW1|G3ILW1_CRIGR	Calpain-1 catalytic subunit OS=Cricetulus griseus GN=I79_024883 PE=4 SV=1	CRIGR	3
	1029	796	5.96	5.96	78.57	78.57	78.57	tr|G3I9A3|G3I9A3_CRIGR	Neudesin OS=Cricetulus griseus GN=I79_020139 PE=4 SV=1	CRIGR	3
	1030	797	5.93	5.93	48.72	41.88	21.37	tr|G3I003|G3I003_CRIGR	60S ribosomal protein L13a OS=Cricetulus griseus GN=I79_016670 PE=4 SV=1	CRIGR	3
	1031	798	5.91	5.91	27.05	19.45	9.119	tr|G3HUN1|G3HUN1_CRIGR	Ubiquitin carboxyl-terminal hydrolase isozyme L5 OS=Cricetulus griseus GN=I79_014645 PE=4 SV=1	CRIGR	3
	1032	799	5.89	5.89	35.71	35.71	28.57	tr|G3H4C1|G3H4C1_CRIGR	60S ribosomal protein L18a OS=Cricetulus griseus GN=I79_005122 PE=4 SV=1	CRIGR	3
	1033	800	5.87	5.87	46	46	30	tr|G3IGW0|G3IGW0_CRIGR	Protein CTLA-2-beta OS=Cricetulus griseus GN=I79_023037 PE=4 SV=1	CRIGR	3
	1034	804	5.84	5.84	46.25	21.74	21.74	tr|G3H1Z4|G3H1Z4_CRIGR	DnaJ-like subfamily C member 8 OS=Cricetulus griseus GN=I79_004193 PE=4 SV=1	CRIGR	3
	1035	805	5.8	5.8	20	8.19	6.667	tr|G3HSH0|G3HSH0_CRIGR	Mitochondrial ribonuclease P protein 1 OS=Cricetulus griseus GN=I79_013801 PE=4 SV=1	CRIGR	3
	1036	805	0	5.25	37.58	21.21	21.21	tr|G3GZI0|G3GZI0_CRIGR	PEST proteolytic signal-containing nuclear protein OS=Cricetulus griseus GN=I79_003242 PE=4 SV=1	CRIGR	3
	1037	806	5.8	5.8	21.36	8.636	8.636	tr|G3HCI0|G3HCI0_CRIGR	Perilipin OS=Cricetulus griseus GN=I79_008191 PE=3 SV=1	CRIGR	3
	1038	807	5.79	5.79	28.64	25.63	14.57	tr|G3HRW8|G3HRW8_CRIGR	Heterogeneous nuclear ribonucleoprotein M OS=Cricetulus griseus GN=I79_013592 PE=4 SV=1	CRIGR	3
	1039	809	5.78	5.78	22.42	9.589	5.106	tr|G3HVJ5|G3HVJ5_CRIGR	Squamous cell carcinoma antigen recognized by T-cells 3 OS=Cricetulus griseus GN=I79_014984 PE=4 SV=1	CRIGR	3
	1040	810	5.77	5.77	40.3	40.3	33.58	tr|G3IEX3|G3IEX3_CRIGR	Peptidyl-prolyl cis-trans isomerase H OS=Cricetulus griseus GN=I79_022278 PE=3 SV=1	CRIGR	3
	1041	811	5.75	5.75	9.533	6.42	6.42	tr|G3GYL0|G3GYL0_CRIGR	CUG-BP-and ETR-3-like factor 1 OS=Cricetulus griseus GN=I79_002890 PE=4 SV=1	CRIGR	3
	1042	813	5.74	5.74	10.17	7.565	7.565	tr|G3I837|G3I837_CRIGR	Mannose-6-phosphate isomerase OS=Cricetulus griseus GN=I79_019694 PE=3 SV=1	CRIGR	3
	1043	814	5.72	5.75	21.18	9.031	5.255	tr|G3H381|G3H381_CRIGR	Kinesin light chain 1 OS=Cricetulus griseus GN=I79_004696 PE=4 SV=1	CRIGR	3
	1044	815	5.72	5.72	14.85	9.727	5.802	tr|G3I531|G3I531_CRIGR	Ran GTPase-activating protein 1 OS=Cricetulus griseus GN=I79_018572 PE=4 SV=1	CRIGR	3
	1045	816	5.7	5.72	40	40	40	tr|G3H4W0|G3H4W0_CRIGR	Thymidylate kinase OS=Cricetulus griseus GN=I79_005323 PE=4 SV=1	CRIGR	3
	1046	817	5.69	5.69	25.35	25.35	20.19	tr|G3I5W3|G3I5W3_CRIGR	TAR DNA-binding protein 43 OS=Cricetulus griseus GN=I79_018871 PE=4 SV=1	CRIGR	3
	1047	818	5.67	5.67	26.79	6.725	5.182	tr|G3IAU0|G3IAU0_CRIGR	Putative uncharacterized protein (Fragment) OS=Cricetulus griseus GN=I79_020720 PE=4 SV=1	CRIGR	3
	1048	823	5.59	5.59	25.19	11.97	9.975	tr|G3I0R3|G3I0R3_CRIGR	Nicotinamide phosphoribosyltransferase (Fragment) OS=Cricetulus griseus GN=I79_016952 PE=4 SV=1	CRIGR	3
	1049	829	5.51	5.51	17.52	7.19	5.882	tr|G3HGF9|G3HGF9_CRIGR	Protein transport protein Sec23A OS=Cricetulus griseus GN=I79_009685 PE=4 SV=1	CRIGR	3
	1050	831	5.48	5.7	9.766	4.843	4.278	tr|G3GZG1|G3GZG1_CRIGR	Toll-like receptor 9 (Fragment) OS=Cricetulus griseus GN=I79_003262 PE=4 SV=1	CRIGR	3
	1051	833	5.47	5.47	16.34	11.76	11.76	tr|G3HBZ8|G3HBZ8_CRIGR	Ubiquitin-associated protein 2-like OS=Cricetulus griseus GN=I79_008037 PE=4 SV=1	CRIGR	3
	1052	835	5.45	5.45	17.08	11.88	9.158	tr|G3ILQ1|G3ILQ1_CRIGR	Thyroid receptor-interacting protein 13 OS=Cricetulus griseus GN=I79_024822 PE=4 SV=1	CRIGR	3
	1053	836	5.44	5.44	37.07	33.17	24.88	tr|G3HG78|G3HG78_CRIGR	Apolipoprotein A-I-binding protein OS=Cricetulus griseus GN=I79_009597 PE=4 SV=1	CRIGR	3
	1054	837	5.43	5.43	36.79	23.21	13.93	tr|G3IHH9|G3IHH9_CRIGR	Isoamyl acetate-hydrolyzing esterase 1-like OS=Cricetulus griseus GN=I79_023269 PE=4 SV=1	CRIGR	3
	1055	838	5.43	5.43	39.29	34.29	27.86	tr|G3IE25|G3IE25_CRIGR	Clathrin light chain A OS=Cricetulus griseus GN=I79_021967 PE=4 SV=1	CRIGR	3
	1056	839	5.42	5.42	15.17	11.85	11.85	tr|G3I6B8|G3I6B8_CRIGR	Coatomer subunit zeta-1 OS=Cricetulus griseus GN=I79_019033 PE=4 SV=1	CRIGR	3
	1057	840	5.41	5.41	33.33	12.62	12.62	tr|G3GUG7|G3GUG7_CRIGR	Protein DEK OS=Cricetulus griseus GN=I79_001326 PE=4 SV=1	CRIGR	3
	1058	841	5.41	5.41	22.38	17.14	17.14	tr|G3HF18|G3HF18_CRIGR	Tudor domain-containing protein 12 OS=Cricetulus griseus GN=I79_009173 PE=4 SV=1	CRIGR	3
	1059	842	5.41	5.41	58.33	58.33	58.33	tr|G3HNR0|G3HNR0_CRIGR	Flavin reductase OS=Cricetulus griseus GN=I79_012403 PE=4 SV=1	CRIGR	3
	1060	843	5.41	5.41	11.11	11.11	11.11	tr|G3GWU4|G3GWU4_CRIGR	Vesicle-associated membrane protein-associated protein B OS=Cricetulus griseus GN=I79_002227 PE=4 SV=1	CRIGR	3
	1061	846	5.37	5.38	57.14	38.57	38.57	tr|G3IPY4|G3IPY4_CRIGR	60S ribosomal protein L18a OS=Cricetulus griseus GN=I79_026069 PE=4 SV=1	CRIGR	3
	1062	847	5.35	5.35	51.79	46.43	46.43	tr|G3HF77|G3HF77_CRIGR	40S ribosomal protein S15 OS=Cricetulus griseus GN=I79_009233 PE=3 SV=1	CRIGR	3
	1063	848	5.34	5.34	25.4	12.7	11.32	tr|G3HM98|G3HM98_CRIGR	Drebrin-like protein OS=Cricetulus griseus GN=I79_011849 PE=4 SV=1	CRIGR	3
	1064	850	5.33	5.33	9.536	2.77	2.078	tr|G3GUH8|G3GUH8_CRIGR	Serine/threonine-protein kinase WNK2 OS=Cricetulus griseus GN=I79_001340 PE=4 SV=1	CRIGR	3
	1065	851	5.33	5.33	20.08	9.756	8.068	tr|G3I9G3|G3I9G3_CRIGR	Copine-3 OS=Cricetulus griseus GN=I79_020210 PE=4 SV=1	CRIGR	3
	1066	853	5.32	5.32	25.91	16.79	13.87	tr|G3I015|G3I015_CRIGR	NAD(P)H dehydrogenase [quinone] 1 OS=Cricetulus griseus GN=I79_016687 PE=4 SV=1	CRIGR	3
	1067	854	5.31	5.31	18.93	13.25	13.25	tr|Q9Z2J2|Q9Z2J2_CRIGR	Apurinic/apyrimidinic endonuclease OS=Cricetulus griseus GN=APE PE=4 SV=1	CRIGR	3
	1068	856	5.3	5.3	47.44	33.02	24.65	tr|G3HPA0|G3HPA0_CRIGR	2,4-dienoyl-CoA reductase, mitochondrial (Fragment) OS=Cricetulus griseus GN=I79_012608 PE=4 SV=1	CRIGR	3
	1069	857	5.28	5.45	15.33	9.451	7.28	tr|G3HYL0|G3HYL0_CRIGR	Eukaryotic translation initiation factor 4 gamma 2 OS=Cricetulus griseus GN=I79_016148 PE=4 SV=1	CRIGR	3
	1070	859	5.26	5.26	17.35	9.162	6.823	tr|G3IH34|G3IH34_CRIGR	Apoptosis inhibitor 5 OS=Cricetulus griseus GN=I79_023113 PE=4 SV=1	CRIGR	3
	1071	860	5.26	5.26	26.53	26.53	26.53	tr|G3IJ85|G3IJ85_CRIGR	Ubiquitin-conjugating enzyme E2 D3 OS=Cricetulus griseus GN=I79_023918 PE=3 SV=1	CRIGR	3
	1072	863	5.21	5.21	18.91	13.28	6.25	tr|G3HDE8|G3HDE8_CRIGR	Phosphoenolpyruvate carboxykinase [GTP], mitochondrial OS=Cricetulus griseus GN=I79_008554 PE=3 SV=1	GTP	3
	1073	864	5.21	5.21	30.19	30.19	23.58	tr|G3I094|G3I094_CRIGR	60S ribosomal protein L36a OS=Cricetulus griseus GN=I79_016771 PE=3 SV=1	CRIGR	3
	1074	864	0	5.21	30.19	30.19	23.58	tr|G3HN30|G3HN30_CRIGR	60S ribosomal protein L36a OS=Cricetulus griseus GN=I79_012161 PE=3 SV=1	CRIGR	3
	1075	864	0	5.21	30.19	30.19	23.58	tr|G3HLJ9|G3HLJ9_CRIGR	60S ribosomal protein L36a OS=Cricetulus griseus GN=I79_011589 PE=3 SV=1	CRIGR	3
	1076	864	0	5.21	30.77	30.77	24.04	tr|G3HH35|G3HH35_CRIGR	60S ribosomal protein L36a OS=Cricetulus griseus GN=I79_009931 PE=4 SV=1	CRIGR	3
	1077	865	5.18	5.18	26.52	17.68	17.68	tr|G3I6G7|G3I6G7_CRIGR	ADP-ribosylation factor-like protein 2 OS=Cricetulus griseus GN=I79_019097 PE=3 SV=1	CRIGR	3
	1078	867	5.15	5.15	22.22	22.22	19.56	tr|G3IG96|G3IG96_CRIGR	Glutamate--cysteine ligase regulatory subunit OS=Cricetulus griseus GN=I79_022778 PE=4 SV=1	CRIGR	3
	1079	868	5.15	5.15	19.62	13.92	13.92	tr|G3HBH4|G3HBH4_CRIGR	Low molecular weight phosphotyrosine protein phosphatase OS=Cricetulus griseus GN=I79_007802 PE=4 SV=1	CRIGR	3
	1080	869	5.14	5.14	19.85	5.191	5.191	tr|G3HD93|G3HD93_CRIGR	Cancer-associated gene 1 protein-like OS=Cricetulus griseus GN=I79_008472 PE=4 SV=1	CRIGR	3
	1081	870	5.14	5.14	5.68	5.68	5.68	tr|G3H7F1|G3H7F1_CRIGR	Nuclear cap-binding protein subunit 1 OS=Cricetulus griseus GN=I79_006282 PE=4 SV=1	CRIGR	3
	1082	871	5.12	5.12	45.45	35.54	26.45	tr|G3HJH9|G3HJH9_CRIGR	Replication protein A 14 kDa subunit OS=Cricetulus griseus GN=I79_010824 PE=4 SV=1	CRIGR	3
	1083	872	5.1	5.1	21.73	19.17	16.29	tr|G3IGN7|G3IGN7_CRIGR	BRCA2 and CDKN1A-interacting protein OS=Cricetulus griseus GN=I79_022957 PE=3 SV=1	CRIGR	3
	1084	873	5.07	5.07	8.724	3.786	3.786	tr|G3I2F8|G3I2F8_CRIGR	U4/U6.U5 tri-snRNP-associated protein 1 OS=Cricetulus griseus GN=I79_017600 PE=4 SV=1	CRIGR	3
	1085	874	5.05	5.05	21.04	16.83	16.83	tr|G3HIL4|G3HIL4_CRIGR	Anamorsin OS=Cricetulus griseus GN=Ciapin1 PE=3 SV=1	CRIGR	3
	1086	875	5.03	5.03	18.22	14.83	14.83	tr|G3I4E6|G3I4E6_CRIGR	Inositol monophosphatase OS=Cricetulus griseus GN=I79_018324 PE=4 SV=1	CRIGR	3
	1087	876	5.01	5.01	34.85	24.07	16.6	tr|G3HR10|G3HR10_CRIGR	Dihydropteridine reductase OS=Cricetulus griseus GN=I79_013270 PE=4 SV=1	CRIGR	3
	1088	877	4.99	4.99	52.17	51.09	32.61	tr|G3H3Z5|G3H3Z5_CRIGR	60S ribosomal protein L37a OS=Cricetulus griseus GN=I79_004988 PE=3 SV=1	CRIGR	3
	1089	878	4.99	4.99	21.1	18.57	18.57	tr|G3HLM2|G3HLM2_CRIGR	Glycylpeptide N-tetradecanoyltransferase OS=Cricetulus griseus GN=I79_011612 PE=3 SV=1	CRIGR	3
	1090	879	4.99	4.99	12.16	12.16	12.16	tr|G3I519|G3I519_CRIGR	Latexin OS=Cricetulus griseus GN=I79_018559 PE=4 SV=1	CRIGR	3
	1091	880	4.97	4.97	46.22	37.82	37.82	tr|G3HGH4|G3HGH4_CRIGR	Small nuclear ribonucleoprotein Sm D1 OS=Cricetulus griseus GN=I79_009701 PE=4 SV=1	CRIGR	3
	1092	881	4.97	4.97	51.19	51.19	51.19	tr|G3HA24|G3HA24_CRIGR	Heat shock protein beta-1 (Fragment) OS=Cricetulus griseus GN=I79_007264 PE=3 SV=1	CRIGR	3
	1093	882	4.96	4.96	17.27	2.544	2.544	tr|G3H6D9|G3H6D9_CRIGR	Cytosine-specific methyltransferase OS=Cricetulus griseus GN=I79_005894 PE=3 SV=1	CRIGR	3
	1094	884	4.93	4.93	15.12	10.98	9.268	sp|P49130|LAMP2_CRIGR	Lysosome-associated membrane glycoprotein 2 OS=Cricetulus griseus GN=LAMP2 PE=2 SV=1	CRIGR	3
	1095	885	4.92	4.92	16.96	12.91	7.595	tr|G3GZB2|G3GZB2_CRIGR	Acid ceramidase OS=Cricetulus griseus GN=I79_003173 PE=4 SV=1	CRIGR	3
	1096	890	4.78	4.78	24.72	13.48	7.191	tr|G3HZY5|G3HZY5_CRIGR	U1 small nuclear ribonucleoprotein 70 kDa OS=Cricetulus griseus GN=I79_016650 PE=4 SV=1	CRIGR	3
	1097	891	4.75	4.75	26.54	9.005	7.346	tr|G3ICJ8|G3ICJ8_CRIGR	Isovaleryl-CoA dehydrogenase, mitochondrial OS=Cricetulus griseus GN=I79_021396 PE=3 SV=1	CRIGR	3
	1098	894	4.72	4.72	14.17	10.18	6.188	tr|G3HE04|G3HE04_CRIGR	Splicing factor 3A subunit 3 OS=Cricetulus griseus GN=I79_008773 PE=4 SV=1	CRIGR	3
	1099	895	4.71	4.72	15.83	10.06	8.38	tr|G3HAR2|G3HAR2_CRIGR	Copine-1 OS=Cricetulus griseus GN=I79_007520 PE=4 SV=1	CRIGR	3
	1100	896	4.71	4.71	33.5	23.79	16.02	tr|G3GV75|G3GV75_CRIGR	Ras-related protein Ral-A OS=Cricetulus griseus GN=I79_001606 PE=4 SV=1	CRIGR	3
	1101	898	4.68	4.68	17.55	12.45	6.939	tr|G3I8B9|G3I8B9_CRIGR	AP-2 complex subunit beta OS=Cricetulus griseus GN=I79_019782 PE=4 SV=1	CRIGR	3
	1102	900	4.67	4.67	34.12	14.51	14.51	tr|G3HJG1|G3HJG1_CRIGR	Cold shock domain-containing protein E1 OS=Cricetulus griseus GN=I79_010806 PE=4 SV=1	CRIGR	3
	1103	901	4.64	4.64	11.67	6.625	5.047	tr|G3I132|G3I132_CRIGR	Acetoacetyl-CoA synthetase OS=Cricetulus griseus GN=I79_017077 PE=4 SV=1	CRIGR	3
	1104	903	4.61	4.61	18.9	6.977	4.651	tr|G3I2D8|G3I2D8_CRIGR	Band 4.1-like protein 2 OS=Cricetulus griseus GN=I79_017569 PE=4 SV=1	CRIGR	3
	1105	910	4.53	4.53	27.64	12.82	12.82	sp|P25321|KAPCA_CRIGR	cAMP-dependent protein kinase catalytic subunit alpha OS=Cricetulus griseus GN=PRKACA PE=2 SV=2	CRIGR	3
	1106	910	0	4.53	23.65	12.82	12.82	tr|G3HD12|G3HD12_CRIGR	cAMP-dependent protein kinase catalytic subunit alpha OS=Cricetulus griseus GN=I79_008384 PE=4 SV=1	CRIGR	3
	1107	913	4.51	4.51	31.54	19	16.49	tr|G3H5P2|G3H5P2_CRIGR	Four and a half LIM domains protein 2 OS=Cricetulus griseus GN=I79_005626 PE=4 SV=1	CRIGR	3
	1108	914	4.5	4.56	19.03	11.06	11.06	tr|G3HS06|G3HS06_CRIGR	40S ribosomal protein S10 OS=Cricetulus griseus GN=I79_013631 PE=4 SV=1	CRIGR	3
	1109	916	4.47	4.47	21.4	9.892	7.374	tr|G3I6L2|G3I6L2_CRIGR	Elongator complex protein 3 OS=Cricetulus griseus GN=I79_019136 PE=4 SV=1	CRIGR	3
	1110	919	4.45	4.69	51.46	34.47	21.36	tr|G3HHA7|G3HHA7_CRIGR	Peptidyl-prolyl cis-trans isomerase OS=Cricetulus griseus GN=I79_010005 PE=3 SV=1	CRIGR	3
	1111	920	4.45	4.47	14.85	4.902	4.902	tr|G3IDS0|G3IDS0_CRIGR	Pre-mRNA-processing factor 40-like A OS=Cricetulus griseus GN=I79_021853 PE=4 SV=1	CRIGR	3
	1112	922	4.45	4.45	34.69	28.41	14.39	tr|G3HWJ5|G3HWJ5_CRIGR	Poly(U)-binding-splicing factor PUF60 OS=Cricetulus griseus GN=I79_015378 PE=4 SV=1	CRIGR	3
	1113	925	4.38	4.39	30.17	20.67	20.67	tr|G3HJJ1|G3HJJ1_CRIGR	Ribose-5-phosphate isomerase OS=Cricetulus griseus GN=I79_010838 PE=4 SV=1	CRIGR	3
	1114	926	4.35	4.35	20.41	9.819	9.819	tr|G3I8R8|G3I8R8_CRIGR	GTPase-activating protein and VPS9 domain-containing protein 1 OS=Cricetulus griseus GN=I79_019945 PE=4 SV=1	CRIGR	3
	1115	927	4.34	4.34	21.79	21.79	19.07	tr|G3H7R4|G3H7R4_CRIGR	Thioredoxin-dependent peroxide reductase, mitochondrial OS=Cricetulus griseus GN=I79_006402 PE=4 SV=1	CRIGR	3
	1116	929	4.32	4.32	14.05	4.124	4.124	tr|G3GX75|G3GX75_CRIGR	Hepatocyte growth factor-regulated tyrosine kinase substrate OS=Cricetulus griseus GN=I79_002390 PE=4 SV=1	CRIGR	3
	1117	931	4.3	4.3	27.27	27.27	22.31	tr|G3H2A8|G3H2A8_CRIGR	Actin-related protein 2/3 complex subunit 3 (Fragment) OS=Cricetulus griseus GN=I79_004279 PE=4 SV=1	CRIGR	3
	1118	932	4.27	4.27	42.07	27.44	21.34	tr|G3HKC5|G3HKC5_CRIGR	Splicing factor, arginine/serine-rich 3 OS=Cricetulus griseus GN=I79_011145 PE=4 SV=1	CRIGR	3
	1119	932	0	4.04	55.9	21.74	21.74	tr|G3H3V5|G3H3V5_CRIGR	Splicing factor, arginine/serine-rich 3 OS=Cricetulus griseus GN=I79_004945 PE=4 SV=1	CRIGR	3
	1120	935	4.23	4.3	37.62	25.74	13.86	tr|G3HYL2|G3HYL2_CRIGR	60S ribosomal protein L10 OS=Cricetulus griseus GN=I79_016151 PE=4 SV=1	CRIGR	3
	1121	935	0	4.07	34	20	14	tr|G3I0C0|G3I0C0_CRIGR	60S ribosomal protein L10 OS=Cricetulus griseus GN=I79_016799 PE=4 SV=1	CRIGR	3
	1122	942	4.17	4.17	24.15	10.14	8.052	sp|O70523|FXR1_CRIGR	Fragile X mental retardation syndrome-related protein 1 OS=Cricetulus griseus GN=FXR1 PE=2 SV=1	CRIGR	3
	1123	946	4.15	4.15	8.102	8.102	8.102	tr|G3HPQ0|G3HPQ0_CRIGR	Splicing factor U2AF 65 kDa subunit OS=Cricetulus griseus GN=I79_012765 PE=4 SV=1	CRIGR	3
	1124	949	4.13	4.13	34.59	21.05	20.3	tr|G3H156|G3H156_CRIGR	Prefoldin subunit 4 OS=Cricetulus griseus GN=I79_003880 PE=4 SV=1	CRIGR	3
	1125	958	4.08	4.08	20.2	11.68	11.68	tr|G3HXK8|G3HXK8_CRIGR	Prenylcysteine oxidase OS=Cricetulus griseus GN=I79_015733 PE=4 SV=1	CRIGR	3
	1126	962	4.07	4.07	13.78	9.694	9.694	tr|G3HVP2|G3HVP2_CRIGR	Stathmin (Fragment) OS=Cricetulus griseus GN=I79_015032 PE=3 SV=1	CRIGR	3
	1127	973	4.03	4.03	10.5	7.534	7.534	tr|G3HHE4|G3HHE4_CRIGR	Leucyl-tRNA synthetase, cytoplasmic OS=Cricetulus griseus GN=I79_010044 PE=4 SV=1	CRIGR	3
	1128	975	4.02	4.02	5.591	0.9039	0.9039	tr|G3HUC4|G3HUC4_CRIGR	Sushi, von Willebrand factor type A, EGF and pentraxin domain-containing protein 1 OS=Cricetulus griseus GN=I79_014532 PE=4 SV=1	CRIGR	3
	1129	982	4.01	5.23	61.21	43.97	43.97	tr|G3IPE1|G3IPE1_CRIGR	Hydroxyacyl-coenzyme A dehydrogenase, mitochondrial OS=Cricetulus griseus GN=I79_025848 PE=4 SV=1	CRIGR	3
	1130	985	4.01	4.01	14.08	14.08	14.08	tr|G3HZA8|G3HZA8_CRIGR	Glyceraldehyde-3-phosphate dehydrogenase OS=Cricetulus griseus GN=I79_016405 PE=3 SV=1	CRIGR	3
	1131	993	4	6	27.11	14.65	14.65	tr|G3GXH4|G3GXH4_CRIGR	Cell division protein kinase 6 OS=Cricetulus griseus GN=I79_002464 PE=4 SV=1	CRIGR	3
	1132	994	4	6	41.67	41.67	41.67	tr|G3HM00|G3HM00_CRIGR	60S ribosomal protein L27 OS=Cricetulus griseus GN=I79_011744 PE=4 SV=1	CRIGR	3
	1133	995	4	5.33	13.41	13.41	13.41	tr|G3HSB7|G3HSB7_CRIGR	Nuclear migration protein nudC OS=Cricetulus griseus GN=I79_013747 PE=4 SV=1	CRIGR	3
	1134	1005	4	4	49.32	38.36	38.36	tr|G3IJJ0|G3IJJ0_CRIGR	NHP2-like protein 1 OS=Cricetulus griseus GN=I79_024025 PE=4 SV=1	CRIGR	3
	1135	1007	4	4	23.38	23.38	23.38	tr|G3IPK9|G3IPK9_CRIGR	Adenylate kinase 2, mitochondrial OS=Cricetulus griseus GN=I79_025923 PE=4 SV=1	CRIGR	3
	1136	1008	4	4	21.01	21.01	21.01	tr|G3I0Q4|G3I0Q4_CRIGR	Platelet-activating factor acetylhydrolase IB subunit beta OS=Cricetulus griseus GN=I79_016943 PE=4 SV=1	CRIGR	3
	1137	1009	4	4	22.62	22.62	22.62	tr|G3HY23|G3HY23_CRIGR	Small nuclear ribonucleoprotein Sm D3 OS=Cricetulus griseus GN=I79_015922 PE=4 SV=1	CRIGR	3
	1138	1015	3.95	4.02	22.13	13.45	8.683	tr|G3H0S4|G3H0S4_CRIGR	Sorbitol dehydrogenase OS=Cricetulus griseus GN=I79_003742 PE=3 SV=1	CRIGR	3
	1139	1019	3.89	3.89	21.36	6.811	6.811	tr|G3HFI4|G3HFI4_CRIGR	Protein FAM49A OS=Cricetulus griseus GN=I79_009342 PE=4 SV=1	CRIGR	3
	1140	1021	3.85	3.85	9.967	5.229	5.229	tr|G3H3X1|G3H3X1_CRIGR	Apoptosis-inducing factor 1, mitochondrial OS=Cricetulus griseus GN=I79_004962 PE=4 SV=1	CRIGR	3
	1141	1025	3.83	6.09	54.63	39.81	32.41	tr|G3I9W7|G3I9W7_CRIGR	Ras-related protein Rab-6A (Fragment) OS=Cricetulus griseus GN=I79_020378 PE=4 SV=1	CRIGR	3
	1142	1026	3.83	3.84	8.163	6.679	6.679	tr|G3H2P1|G3H2P1_CRIGR	F-box/LRR-repeat protein 2 OS=Cricetulus griseus GN=I79_004459 PE=4 SV=1	CRIGR	3
	1143	1030	0	5.74	26.52	26.52	26.52	tr|G3HV98|G3HV98_CRIGR	Ribose-phosphate pyrophosphokinase 1 OS=Cricetulus griseus GN=I79_014878 PE=4 SV=1	CRIGR	3
	1144	1038	3.72	3.72	10.48	7.903	5	tr|G3HFL6|G3HFL6_CRIGR	ATP-binding cassette sub-family G member 3 OS=Cricetulus griseus GN=I79_009378 PE=4 SV=1	CRIGR	3
	1145	1066	3.48	3.48	36.77	15.7	15.7	tr|G3H1G7|G3H1G7_CRIGR	Proline synthetase co-transcribed bacterial-like protein OS=Cricetulus griseus GN=I79_003993 PE=3 SV=1	CRIGR	3
	1146	1067	3.48	3.48	17.33	12.27	12.27	tr|C4PFX6|C4PFX6_CRIGR	Caspase 3 OS=Cricetulus griseus GN=CASP 3 PE=2 SV=1	CRIGR	3
	1147	1071	3.46	3.46	25.38	25.38	20	tr|G3HFR3|G3HFR3_CRIGR	Transmembrane emp24 domain-containing protein 10 OS=Cricetulus griseus GN=I79_009427 PE=4 SV=1	CRIGR	3
	1148	1080	3.37	3.37	37.08	37.08	37.08	tr|G3I9M5|G3I9M5_CRIGR	Dynein light chain 1, cytoplasmic OS=Cricetulus griseus GN=I79_020279 PE=4 SV=1	CRIGR	3
	1149	1091	3.24	3.25	21.05	15.35	15.35	tr|G3HQT0|G3HQT0_CRIGR	Proteasome subunit beta type OS=Cricetulus griseus GN=I79_013186 PE=3 SV=1	CRIGR	3
	1150	1094	3.23	5.36	19.69	13.21	9.585	tr|G3HKA5|G3HKA5_CRIGR	Sorting nexin-2 OS=Cricetulus griseus GN=I79_011124 PE=4 SV=1	CRIGR	3
	1151	1095	3.21	3.21	24.28	10.47	8.241	tr|G3I903|G3I903_CRIGR	Acyl-coenzyme A thioesterase 9, mitochondrial OS=Cricetulus griseus GN=I79_020036 PE=4 SV=1	CRIGR	3
	1152	1116	3.06	3.06	16.15	13.06	9.622	tr|G3HNR3|G3HNR3_CRIGR	U1 small nuclear ribonucleoprotein A OS=Cricetulus griseus GN=I79_012406 PE=4 SV=1	CRIGR	3
	1153	1146	2.79	2.8	7.338	1.874	1.874	tr|G3GY55|G3GY55_CRIGR	Period circadian protein-like 1 OS=Cricetulus griseus GN=I79_002719 PE=4 SV=1	CRIGR	3
	1154	1155	2.71	2.71	28.57	28.57	28.57	tr|G3HKN6|G3HKN6_CRIGR	cAMP-dependent protein kinase type II-alpha regulatory subunit (Fragment) OS=Cricetulus griseus GN=I79_011265 PE=4 SV=1	CRIGR	3
	1155	1168	2.61	2.61	6.744	4.335	3.565	tr|G3I7Z8|G3I7Z8_CRIGR	Importin-7 OS=Cricetulus griseus GN=I79_019653 PE=4 SV=1	CRIGR	3
	1156	1174	2.6	2.6	19.5	14.11	14.11	tr|G3GV64|G3GV64_CRIGR	Mammalian ependymin-related protein 1 OS=Cricetulus griseus GN=I79_001595 PE=4 SV=1	CRIGR	3
	1157	1176	2.59	2.59	16.08	11.9	11.9	tr|G3HHV6|G3HHV6_CRIGR	Protein FAM98B OS=Cricetulus griseus GN=I79_010217 PE=4 SV=1	CRIGR	3
	1158	1306	2.03	5.25	50.31	22.09	22.09	tr|G3GZH9|G3GZH9_CRIGR	PEST proteolytic signal-containing nuclear protein OS=Cricetulus griseus GN=I79_003241 PE=4 SV=1	CRIGR	3
	1159	1307	2.03	2.78	20.55	2.486	2.486	tr|G3IGI9|G3IGI9_CRIGR	STE20-like serine/threonine-protein kinase OS=Cricetulus griseus GN=I79_022906 PE=4 SV=1	CRIGR	3
	1160	1319	0	4.89	23.76	23.76	23.76	tr|G3IAQ1|G3IAQ1_CRIGR	60S ribosomal protein L7a OS=Cricetulus griseus GN=I79_020677 PE=4 SV=1	CRIGR	3
	1161	1360	2	6.04	41.29	25.81	25.81	tr|G3INX6|G3INX6_CRIGR	Spliceosome RNA helicase BAT1 OS=Cricetulus griseus GN=I79_025672 PE=4 SV=1	CRIGR	3
	1162	1361	2	6	59.26	37.04	37.04	tr|G3H3Y8|G3H3Y8_CRIGR	60S ribosomal protein L32 OS=Cricetulus griseus GN=I79_004981 PE=4 SV=1	CRIGR	3
	1163	1361	0	6	55.22	44.78	44.78	tr|G3HTS3|G3HTS3_CRIGR	60S ribosomal protein L32 OS=Cricetulus griseus GN=I79_014301 PE=4 SV=1	CRIGR	3
	1164	1362	2	6	32.79	31.97	31.97	tr|G3IEG9|G3IEG9_CRIGR	Heterogeneous nuclear ribonucleoprotein A3 OS=Cricetulus griseus GN=I79_022116 PE=4 SV=1	CRIGR	3
	1165	1363	2	5.36	37.31	37.31	37.31	tr|G3ILY1|G3ILY1_CRIGR	Ubiquitin-conjugating enzyme E2 variant 2 OS=Cricetulus griseus GN=I79_024907 PE=4 SV=1	CRIGR	3
	1166	1363	0	5.36	38.46	38.46	38.46	tr|G3I3E3|G3I3E3_CRIGR	Ubiquitin-conjugating enzyme E2 variant 2 OS=Cricetulus griseus GN=I79_017948 PE=4 SV=1	CRIGR	3
	1167	1369	2	4	68.63	68.63	68.63	tr|G3HK42|G3HK42_CRIGR	60S ribosomal protein L30 OS=Cricetulus griseus GN=I79_011057 PE=4 SV=1	CRIGR	3
	1168	1428	2	2	8.475	8.475	8.475	tr|G3HXZ3|G3HXZ3_CRIGR	CD81 antigen OS=Cricetulus griseus GN=I79_015909 PE=4 SV=1	CRIGR	3
	1169	1524	1.48	5.82	30.56	21.53	18.06	tr|G3H151|G3H151_CRIGR	60S ribosomal protein L27 OS=Cricetulus griseus GN=I79_003875 PE=4 SV=1	CRIGR	3
	1170	1572	1.24	3.35	28.57	25	25	tr|G3H5C9|G3H5C9_CRIGR	40S ribosomal protein S27 OS=Cricetulus griseus GN=I79_005510 PE=3 SV=1	CRIGR	3
	1171	920	4.45	4.47	14.85	4.902	4.902	tr|G3IDS0|G3IDS0_CRIGR	Pre-mRNA-processing factor 40-like A OS=Cricetulus griseus GN=I79_021853 PE=4 SV=1	CRIGR	3
	1172	1168	2.61	2.61	6.744	4.335	3.565	tr|G3I7Z8|G3I7Z8_CRIGR	Importin-7 OS=Cricetulus griseus GN=I79_019653 PE=4 SV=1	CRIGR	3
	1173	1751	0.65	4.75	23.81	17.62	13.33	tr|G3H346|G3H346_CRIGR	ADP-ribosylation factor-like protein 8B OS=Cricetulus griseus GN=I79_004655 PE=4 SV=1	CRIGR	3
	1174	1789	0.56	2.65	25.56	18.33	18.33	tr|G3HY27|G3HY27_CRIGR	U2 small nuclear ribonucleoprotein B'' OS=Cricetulus griseus GN=I79_015944 PE=4 SV=1	CRIGR	3
	1175	1823	0.49	4.68	30.97	30.97	30.97	tr|G3I4M4|G3I4M4_CRIGR	Calponin-3 OS=Cricetulus griseus GN=I79_018407 PE=4 SV=1	CRIGR	3
	1176	2014	0	1.5	18.32	13.61	10.47	tr|G3ICC6|G3ICC6_CRIGR	14-3-3 protein theta OS=Cricetulus griseus GN=I79_021319 PE=4 SV=1	CRIGR	3
	1177	1360	2	6.04	41.29	25.81	25.81	tr|G3INX6|G3INX6_CRIGR	Spliceosome RNA helicase BAT1 OS=Cricetulus griseus GN=I79_025672 PE=4 SV=1	CRIGR	3
	1178	848	5.34	5.34	25.4	12.7	11.32	tr|G3HM98|G3HM98_CRIGR	Drebrin-like protein OS=Cricetulus griseus GN=I79_011849 PE=4 SV=1	CRIGR	3
	1179	859	5.26	5.26	17.35	9.162	6.823	tr|G3IH34|G3IH34_CRIGR	Apoptosis inhibitor 5 OS=Cricetulus griseus GN=I79_023113 PE=4 SV=1	CRIGR	3
	1180	860	5.26	5.26	26.53	26.53	26.53	tr|G3IJ85|G3IJ85_CRIGR	Ubiquitin-conjugating enzyme E2 D3 OS=Cricetulus griseus GN=I79_023918 PE=3 SV=1	CRIGR	3
	1181	721	6.57	6.57	17.37	4.049	2.098	tr|G3I7W5|G3I7W5_CRIGR	Myosin-XVIIIa OS=Cricetulus griseus GN=I79_019614 PE=4 SV=1	CRIGR	3
	1182	746	0	4.24	29.1	29.1	22.39	tr|G3IM75|G3IM75_CRIGR	60S ribosomal protein L32 OS=Cricetulus griseus GN=I79_025008 PE=4 SV=1	CRIGR	2
	1183	846	0	3.28	15	15	15	tr|G3I1E1|G3I1E1_CRIGR	60S ribosomal protein L18a OS=Cricetulus griseus GN=I79_017194 PE=4 SV=1	CRIGR	2
	1184	849	5.34	5.34	27.25	16.04	9.451	tr|G3HR96|G3HR96_CRIGR	Bleomycin hydrolase OS=Cricetulus griseus GN=I79_013360 PE=4 SV=1	CRIGR	2
	1185	858	5.28	5.28	17.23	8.288	3.817	tr|G3HMB4|G3HMB4_CRIGR	2-oxoglutarate dehydrogenase E1 component, mitochondrial OS=Cricetulus griseus GN=I79_011865 PE=4 SV=1	CRIGR	2
	1186	860	0	3.64	26.36	26.36	26.36	tr|G3HVI1|G3HVI1_CRIGR	Ubiquitin-conjugating enzyme E2 D2 OS=Cricetulus griseus GN=I79_014970 PE=3 SV=1	CRIGR	2
	1187	866	5.15	5.15	24.45	16.76	7.143	tr|G3I595|G3I595_CRIGR	Histidyl-tRNA synthetase, cytoplasmic OS=Cricetulus griseus GN=I79_018639 PE=4 SV=1	CRIGR	2
	1188	877	0	2.7	32.61	31.52	13.04	tr|G3HWS6|G3HWS6_CRIGR	60S ribosomal protein L37a OS=Cricetulus griseus GN=I79_015438 PE=3 SV=1	CRIGR	2
	1189	878	0	2.9	26.18	16.75	16.75	tr|G3HZ82|G3HZ82_CRIGR	Glycylpeptide N-tetradecanoyltransferase OS=Cricetulus griseus GN=I79_016378 PE=3 SV=1	CRIGR	2
	1190	886	0	4.28	11.44	11.44	8.824	tr|G3H6Y9|G3H6Y9_CRIGR	Poly(RC)-binding protein 2 OS=Cricetulus griseus GN=I79_006113 PE=4 SV=1	CRIGR	2
	1191	888	4.8	4.8	23.29	21.43	12.11	tr|G3I2X3|G3I2X3_CRIGR	Casein kinase II subunit alpha' OS=Cricetulus griseus GN=I79_017768 PE=4 SV=1	CRIGR	2
	1192	896	0	2.64	14.54	7.93	7.93	tr|G3H5E5|G3H5E5_CRIGR	Ras-related protein Ral-B OS=Cricetulus griseus GN=I79_005532 PE=4 SV=1	CRIGR	2
	1193	902	4.62	4.62	5.793	4.724	3.298	tr|G3I854|G3I854_CRIGR	Ubiquitin-associated protein 2 OS=Cricetulus griseus GN=I79_019712 PE=4 SV=1	CRIGR	2
	1194	904	4.58	4.58	65.71	65.71	54.29	tr|G3IAZ4|G3IAZ4_CRIGR	Cysteine-rich protein 1 OS=Cricetulus griseus GN=I79_020780 PE=4 SV=1	CRIGR	2
	1195	905	4.57	4.57	18.74	5.703	2.546	tr|G3HZ17|G3HZ17_CRIGR	Protein phosphatase 1 regulatory subunit 12A OS=Cricetulus griseus GN=I79_016312 PE=4 SV=1	CRIGR	2
	1196	907	4.55	4.55	15.51	5.513	2.564	tr|G3I0C6|G3I0C6_CRIGR	Cullin-5 OS=Cricetulus griseus GN=I79_016805 PE=3 SV=1	CRIGR	2
	1197	908	4.55	4.55	19.15	19.15	14.47	tr|G3I5F4|G3I5F4_CRIGR	Protein canopy-like 4 OS=Cricetulus griseus GN=I79_018700 PE=4 SV=1	CRIGR	2
	1198	911	4.53	4.53	22.66	17.24	13.3	tr|G3I2Q4|G3I2Q4_CRIGR	NEDD8-conjugating enzyme Ubc12 OS=Cricetulus griseus GN=I79_017697 PE=3 SV=1	CRIGR	2
	1199	912	4.52	4.52	23.74	9.244	6.933	tr|G3IFL3|G3IFL3_CRIGR	Signal recognition particle 72 kDa protein OS=Cricetulus griseus GN=I79_022536 PE=4 SV=1	CRIGR	2
	1200	915	4.49	4.49	58.82	58.82	47.06	tr|G3H585|G3H585_CRIGR	Copper transport protein ATOX1 OS=Cricetulus griseus GN=I79_005460 PE=4 SV=1	CRIGR	2
	1201	918	4.46	4.46	36.59	26.83	14.63	tr|G3H8M2|G3H8M2_CRIGR	Protein quaking (Fragment) OS=Cricetulus griseus GN=I79_006726 PE=4 SV=1	CRIGR	2
	1202	921	4.45	4.45	14.61	9.74	4.87	tr|G3IH96|G3IH96_CRIGR	Eukaryotic translation initiation factor 4B OS=Cricetulus griseus GN=I79_023184 PE=4 SV=1	CRIGR	2
	1203	924	4.39	4.39	26.89	15.55	8.824	tr|G3HZ50|G3HZ50_CRIGR	Succinyl-CoA ligase [ADP-forming] subunit beta, mitochondrial OS=Cricetulus griseus GN=I79_016345 PE=4 SV=1	ADP-forming	2
	1204	930	4.3	4.3	13.79	3.645	2.857	tr|G3HWY6|G3HWY6_CRIGR	Dynamin-like 120 kDa protein, mitochondrial OS=Cricetulus griseus GN=I79_015501 PE=3 SV=1	CRIGR	2
	1205	934	4.26	4.26	29.35	29.35	25	tr|G3HQB7|G3HQB7_CRIGR	Small nuclear ribonucleoprotein E OS=Cricetulus griseus GN=I79_013014 PE=4 SV=1	CRIGR	2
	1206	936	4.23	4.23	23.31	19.07	11.02	tr|G3I5E0|G3I5E0_CRIGR	Methylosome subunit pICln OS=Cricetulus griseus GN=I79_018685 PE=4 SV=1	CRIGR	2
	1207	937	4.21	4.21	13.07	6.602	5.089	tr|G3HHE3|G3HHE3_CRIGR	Leucyl-tRNA synthetase, cytoplasmic OS=Cricetulus griseus GN=I79_010043 PE=3 SV=1	CRIGR	2
	1208	938	4.2	4.21	40.44	22.4	13.66	tr|G3HJA4|G3HJA4_CRIGR	26S proteasome non-ATPase regulatory subunit 8 OS=Cricetulus griseus GN=I79_010746 PE=4 SV=1	CRIGR	2
	1209	939	4.2	4.2	15.42	15.42	10.57	tr|G3I2M0|G3I2M0_CRIGR	Sulfatase-modifying factor 2 OS=Cricetulus griseus GN=I79_017658 PE=4 SV=1	CRIGR	2
	1210	941	4.18	4.18	16.19	12.23	8.993	tr|G3ILB1|G3ILB1_CRIGR	Thioredoxin-related transmembrane protein 1 OS=Cricetulus griseus GN=I79_024675 PE=4 SV=1	CRIGR	2
	1211	943	4.16	4.16	17.23	8.738	6.796	tr|G3HXA2|G3HXA2_CRIGR	Basic leucine zipper and W2 domain-containing protein 2 OS=Cricetulus griseus GN=I79_015621 PE=4 SV=1	CRIGR	2
	1212	944	4.16	4.16	17.14	11.71	7.375	tr|G3ILS7|G3ILS7_CRIGR	26S proteasome non-ATPase regulatory subunit 5 OS=Cricetulus griseus GN=I79_024849 PE=4 SV=1	CRIGR	2
	1213	945	4.15	4.15	12.42	3.529	3.529	tr|G3H6K2|G3H6K2_CRIGR	Rho guanine nucleotide exchange factor 6 OS=Cricetulus griseus GN=I79_005967 PE=4 SV=1	CRIGR	2
	1214	947	4.14	4.14	15.25	5.496	4.078	tr|G3I7X7|G3I7X7_CRIGR	Liver carboxylesterase 1 OS=Cricetulus griseus GN=I79_019629 PE=4 SV=1	CRIGR	2
	1215	950	4.12	4.12	13.62	13.62	9.859	tr|G3H7F8|G3H7F8_CRIGR	Acidic leucine-rich nuclear phosphoprotein 32 family member B (Fragment) OS=Cricetulus griseus GN=I79_006289 PE=4 SV=1	CRIGR	2
	1216	951	4.11	4.11	51.18	51.18	39.37	tr|G3IEX2|G3IEX2_CRIGR	Nuclease-sensitive element-binding protein 1 OS=Cricetulus griseus GN=I79_022277 PE=4 SV=1	CRIGR	2
	1217	954	4.09	4.09	18.08	7.589	7.589	tr|G3HFY1|G3HFY1_CRIGR	Protein phosphatase 1F OS=Cricetulus griseus GN=I79_009498 PE=3 SV=1	CRIGR	2
	1218	955	4.09	4.09	34.4	13.48	10.64	tr|G3GSY1|G3GSY1_CRIGR	Sodium/potassium-transporting ATPase subunit beta-3 OS=Cricetulus griseus GN=I79_000753 PE=3 SV=1	CRIGR	2
	1219	956	4.09	4.09	27.32	15.46	15.46	tr|G3H5W0|G3H5W0_CRIGR	Proteasome subunit beta type OS=Cricetulus griseus GN=I79_005704 PE=3 SV=1	CRIGR	2
	1220	957	4.08	4.47	22.36	16.33	9.548	tr|G3I6F9|G3I6F9_CRIGR	EH domain-containing protein 1 OS=Cricetulus griseus GN=I79_019087 PE=4 SV=1	CRIGR	2
	1221	959	4.08	4.08	16.13	11.61	11.61	tr|G3H9Z1|G3H9Z1_CRIGR	Microsomal glutathione S-transferase 1 OS=Cricetulus griseus GN=I79_007224 PE=4 SV=1	CRIGR	2
	1222	960	4.07	4.09	20.4	8.312	8.312	tr|G3HTU8|G3HTU8_CRIGR	Galactokinase OS=Cricetulus griseus GN=I79_014328 PE=3 SV=1	CRIGR	2
	1223	961	4.07	4.07	16.07	3.925	3.925	tr|G3IBT1|G3IBT1_CRIGR	Pre-mRNA-processing factor 6 OS=Cricetulus griseus GN=I79_021114 PE=4 SV=1	CRIGR	2
	1224	963	4.07	4.07	14.5	8.922	8.922	tr|G3H1N7|G3H1N7_CRIGR	Splicing factor, arginine/serine-rich 5 OS=Cricetulus griseus GN=I79_004047 PE=4 SV=1	CRIGR	2
	1225	964	4.05	4.05	19.35	7.885	7.885	tr|G3I2G1|G3I2G1_CRIGR	Fos-related antigen 1 OS=Cricetulus griseus GN=I79_017603 PE=4 SV=1	CRIGR	2
	1226	965	4.05	4.05	21.51	17.13	9.562	tr|G3I2G0|G3I2G0_CRIGR	UPF0696 protein C11orf68-like OS=Cricetulus griseus GN=I79_017602 PE=4 SV=1	CRIGR	2
	1227	966	4.05	4.05	9.17	4.844	4.844	tr|G3II70|G3II70_CRIGR	Bifunctional ATP-dependent dihydroxyacetone kinase/FAD-AMP lyase (Cyclizing) OS=Cricetulus griseus GN=I79_023538 PE=4 SV=1	CRIGR	2
	1228	968	4.04	4.04	25.15	10.43	10.43	tr|G3H2C9|G3H2C9_CRIGR	S-phase kinase-associated protein 1 OS=Cricetulus griseus GN=I79_004338 PE=4 SV=1	CRIGR	2
	1229	970	4.03	4.03	16.41	7.813	7.813	tr|G3H6K1|G3H6K1_CRIGR	Heterogeneous nuclear ribonucleoprotein G OS=Cricetulus griseus GN=I79_005965 PE=4 SV=1	CRIGR	2
	1230	970	0	4.02	14.18	7.732	7.732	tr|G3H9H7|G3H9H7_CRIGR	Heterogeneous nuclear ribonucleoprotein G OS=Cricetulus griseus GN=I79_007049 PE=4 SV=1	CRIGR	2
	1231	971	4.03	4.03	20.5	10.56	8.075	tr|G3HA51|G3HA51_CRIGR	Procollagen-lysine,2-oxoglutarate 5-dioxygenase 3 OS=Cricetulus griseus GN=I79_007293 PE=4 SV=1	CRIGR	2
	1232	972	4.03	4.03	6.144	3.533	3.533	tr|G3HMG5|G3HMG5_CRIGR	GA-binding protein alpha chain OS=Cricetulus griseus GN=I79_011929 PE=3 SV=1	CRIGR	2
	1233	977	4.02	4.02	11.3	5.137	5.137	tr|G3HQR1|G3HQR1_CRIGR	Guanine nucleotide-binding protein-like 1 (Fragment) OS=Cricetulus griseus GN=I79_013167 PE=4 SV=1	CRIGR	2
	1234	978	4.02	4.02	34.62	16.92	16.92	tr|G3H7Y4|G3H7Y4_CRIGR	Astrocytic phosphoprotein PEA-15 OS=Cricetulus griseus GN=I79_006480 PE=4 SV=1	CRIGR	2
	1235	978	0	4.02	34.62	16.92	16.92	sp|Q9Z297|PEA15_CRIGR	Astrocytic phosphoprotein PEA-15 OS=Cricetulus griseus GN=PEA15 PE=1 SV=1	CRIGR	2
	1236	979	4.02	4.02	16.67	12.18	12.18	tr|G3IIU8|G3IIU8_CRIGR	Acyl carrier protein OS=Cricetulus griseus GN=I79_023776 PE=3 SV=1	CRIGR	2
	1237	980	4.02	4.02	15.79	15.79	15.79	tr|G3HYH7|G3HYH7_CRIGR	60S ribosomal protein L28 OS=Cricetulus griseus GN=I79_016110 PE=4 SV=1	CRIGR	2
	1238	981	4.02	4.02	16.6	14.34	14.34	tr|G3HQR9|G3HQR9_CRIGR	Estradiol 17-beta-dehydrogenase 8 OS=Cricetulus griseus GN=I79_013175 PE=3 SV=1	CRIGR	2
	1239	983	4.01	4.01	4.792	2.343	2.343	tr|G3GW53|G3GW53_CRIGR	Epithelial cell transforming sequence 2 oncogene-like OS=Cricetulus griseus GN=I79_001970 PE=4 SV=1	CRIGR	2
	1240	984	4.01	4.01	18.13	12.81	12.81	tr|G3GVA8|G3GVA8_CRIGR	Aminoacyl tRNA synthetase complex-interacting multifunctional protein 2 OS=Cricetulus griseus GN=I79_001643 PE=4 SV=1	CRIGR	2
	1241	984	0	4.01	18.13	12.81	12.81	sp|Q9WVM7|AIMP2_CRIGR	Aminoacyl tRNA synthase complex-interacting multifunctional protein 2 OS=Cricetulus griseus GN=AIMP2 PE=2 SV=1	CRIGR	2
	1242	986	4.01	4.01	11.95	9.038	9.038	tr|G3GSJ7|G3GSJ7_CRIGR	D-beta-hydroxybutyrate dehydrogenase, mitochondrial OS=Cricetulus griseus GN=I79_000612 PE=3 SV=1	CRIGR	2
	1243	996	4	4.03	30.41	22.3	22.3	tr|G3HZ74|G3HZ74_CRIGR	Glutaredoxin-related protein 5 OS=Cricetulus griseus GN=I79_016370 PE=4 SV=1	CRIGR	2
	1244	997	4	4.01	33.33	25.45	25.45	tr|G3H9J0|G3H9J0_CRIGR	F-actin-capping protein subunit alpha-2 OS=Cricetulus griseus GN=I79_007064 PE=4 SV=1	CRIGR	2
	1245	998	4	4	31.63	10.71	10.71	tr|G3HUE5|G3HUE5_CRIGR	UPF0368 protein Cxorf26-like OS=Cricetulus griseus GN=I79_014554 PE=4 SV=1	CRIGR	2
	1246	999	4	4	34.2	11.69	11.69	tr|G3HBU2|G3HBU2_CRIGR	STIP1-likey and U box-containing protein 1 OS=Cricetulus griseus GN=I79_007892 PE=4 SV=1	CRIGR	2
	1247	1000	4	4	35.44	16.5	16.5	tr|G3IKF2|G3IKF2_CRIGR	Adenylyl-sulfate kinase OS=Cricetulus griseus GN=I79_024353 PE=3 SV=1	CRIGR	2
	1248	1001	4	4	17.29	8.271	8.271	tr|G3IJ16|G3IJ16_CRIGR	Ubiquitin-like protein FUBI OS=Cricetulus griseus GN=I79_023846 PE=4 SV=1	CRIGR	2
	1249	1001	0	4	17.29	8.271	8.271	tr|G3I460|G3I460_CRIGR	Ubiquitin-like protein FUBI OS=Cricetulus griseus GN=I79_018235 PE=4 SV=1	CRIGR	2
	1250	1001	0	4	32.2	18.64	18.64	sp|P62860|RS30_CRIGR	40S ribosomal protein S30 OS=Cricetulus griseus GN=FAU PE=3 SV=1	CRIGR	2
	1251	1002	4	4	28.93	17.61	17.61	tr|G3I8D0|G3I8D0_CRIGR	Suppressor of G2 allele of SKP1-like OS=Cricetulus griseus GN=I79_019794 PE=4 SV=1	CRIGR	2
	1252	1003	4	4	26.47	17.65	17.65	tr|G3I0A8|G3I0A8_CRIGR	Glycine cleavage system H protein, mitochondrial OS=Cricetulus griseus GN=I79_016785 PE=3 SV=1	CRIGR	2
	1253	1003	0	4	23.57	21.43	21.43	tr|G3HPU8|G3HPU8_CRIGR	Glycine cleavage system H protein, mitochondrial OS=Cricetulus griseus GN=I79_012818 PE=3 SV=1	CRIGR	2
	1254	1004	4	4	41.77	24.05	24.05	tr|G3H6Y5|G3H6Y5_CRIGR	Peptidyl-prolyl cis-trans isomerase OS=Cricetulus griseus GN=I79_006109 PE=4 SV=1	CRIGR	2
	1255	1006	4	4	19.31	17.24	17.24	tr|G3GXX3|G3GXX3_CRIGR	Dolichyl-diphosphooligosaccharide--protein glycosyltransferase subunit 2 OS=Cricetulus griseus GN=I79_002617 PE=4 SV=1	CRIGR	2
	1256	1010	4	4	11.95	11.95	11.95	tr|G3H133|G3H133_CRIGR	Translin OS=Cricetulus griseus GN=I79_003856 PE=4 SV=1	CRIGR	2
	1257	1010	0	4	11.84	11.84	11.84	sp|P97891|TSN_CRIGR	Translin OS=Cricetulus griseus GN=TSN PE=2 SV=1	CRIGR	2
	1258	1011	4	4	10.5	10.5	10.5	tr|G3GYX1|G3GYX1_CRIGR	Nucleolar protein 58 OS=Cricetulus griseus GN=I79_002996 PE=4 SV=1	CRIGR	2
	1259	1012	4	4	18.22	18.22	18.22	tr|G3GTF3|G3GTF3_CRIGR	5'(3')-deoxyribonucleotidase, cytosolic type (Fragment) OS=Cricetulus griseus GN=I79_000934 PE=4 SV=1	CRIGR	2
	1260	1013	4	4	37.93	37.93	37.93	tr|G3GS73|G3GS73_CRIGR	Heterogeneous nuclear ribonucleoprotein A3-like 1 OS=Cricetulus griseus GN=I79_000386 PE=4 SV=1	CRIGR	2
	1261	1014	3.98	3.98	61.63	40.7	40.7	tr|G3I4G8|G3I4G8_CRIGR	BolA-like protein 2 OS=Cricetulus griseus GN=I79_018347 PE=3 SV=1	CRIGR	2
	1262	1016	3.92	3.92	24.5	19.28	14.46	tr|G3I1Y9|G3I1Y9_CRIGR	Sulfated glycoprotein 1 OS=Cricetulus griseus GN=I79_017410 PE=4 SV=1	CRIGR	2
	1263	1017	3.91	3.91	16	7.238	5.333	tr|G3GXT8|G3GXT8_CRIGR	Translation initiation factor eIF-2B subunit delta OS=Cricetulus griseus GN=I79_002581 PE=3 SV=1	CRIGR	2
	1264	1018	3.9	3.9	37.21	10.3	10.3	tr|G3HD84|G3HD84_CRIGR	3-hydroxyisobutyrate dehydrogenase, mitochondrial OS=Cricetulus griseus GN=I79_008461 PE=4 SV=1	CRIGR	2
	1265	1020	3.87	3.87	45.21	25.34	25.34	tr|G3GTN1|G3GTN1_CRIGR	Protein mago nashi-like OS=Cricetulus griseus GN=I79_001016 PE=4 SV=1	CRIGR	2
	1266	1022	3.85	3.85	31.34	31.34	31.34	tr|G3HBJ3|G3HBJ3_CRIGR	Small nuclear ribonucleoprotein F OS=Cricetulus griseus GN=I79_007823 PE=4 SV=1	CRIGR	2
	1267	1024	3.84	3.86	24.39	15.85	15.85	tr|G3HXK5|G3HXK5_CRIGR	Small nuclear ribonucleoprotein G OS=Cricetulus griseus GN=I79_015729 PE=4 SV=1	CRIGR	2
	1268	1024	0	3.81	17.11	17.11	17.11	tr|G3HVZ6|G3HVZ6_CRIGR	Small nuclear ribonucleoprotein G OS=Cricetulus griseus GN=I79_015143 PE=4 SV=1	CRIGR	2
	1269	1027	3.82	3.82	28.9	19.04	7.11	tr|G3HD44|G3HD44_CRIGR	Vacuolar protein sorting-associated protein 4B (Fragment) OS=Cricetulus griseus GN=I79_008418 PE=4 SV=1	CRIGR	2
	1270	1028	3.82	3.82	17.82	7.088	7.088	tr|G3HKJ6|G3HKJ6_CRIGR	Myc box-dependent-interacting protein 1 (Fragment) OS=Cricetulus griseus GN=I79_011224 PE=4 SV=1	CRIGR	2
	1271	1029	3.81	3.83	11.21	6.542	3.338	tr|G3I9F9|G3I9F9_CRIGR	Signal transducer and activator of transcription OS=Cricetulus griseus GN=I79_020201 PE=3 SV=1	CRIGR	2
	1272	1031	3.8	3.8	33.33	26.39	18.06	tr|G3HTM9|G3HTM9_CRIGR	Eukaryotic translation initiation factor 1A OS=Cricetulus griseus GN=I79_014257 PE=3 SV=1	CRIGR	2
	1273	1032	3.8	3.8	26.32	26.32	26.32	tr|G3HIY6|G3HIY6_CRIGR	40S ribosomal protein S19 OS=Cricetulus griseus GN=I79_010618 PE=4 SV=1	CRIGR	2
	1274	1033	3.78	3.78	55.17	44.83	31.03	tr|G3H4U8|G3H4U8_CRIGR	Protein phosphatase 1 regulatory subunit 7 OS=Cricetulus griseus GN=I79_005311 PE=4 SV=1	CRIGR	2
	1275	1035	3.75	3.75	26.87	7.476	3.142	tr|G3IIZ6|G3IIZ6_CRIGR	Structural maintenance of chromosomes protein 3 OS=Cricetulus griseus GN=I79_023826 PE=4 SV=1	CRIGR	2
	1276	1037	3.73	3.73	17.81	9.717	9.717	tr|G3HEL2|G3HEL2_CRIGR	Glucosamine-6-phosphate isomerase 1 (Fragment) OS=Cricetulus griseus GN=I79_008999 PE=4 SV=1	CRIGR	2
	1277	1039	3.7	3.7	19.04	9.137	9.137	tr|G3H2P6|G3H2P6_CRIGR	Cytoplasmic dynein 1 light intermediate chain 1 OS=Cricetulus griseus GN=I79_004464 PE=4 SV=1	CRIGR	2
	1278	1040	3.7	3.7	31.18	31.18	31.18	tr|G3I3D5|G3I3D5_CRIGR	SH3 domain-binding glutamic acid-rich-like protein OS=Cricetulus griseus GN=I79_017939 PE=3 SV=1	CRIGR	2
	1279	1041	3.69	3.69	13.17	5.58	5.58	tr|G3I7U9|G3I7U9_CRIGR	Serine protease HTRA2, mitochondrial OS=Cricetulus griseus GN=I79_019598 PE=4 SV=1	CRIGR	2
	1280	1042	3.69	3.69	13.72	11.86	5.581	tr|G3H497|G3H497_CRIGR	Inositol-3-phosphate synthase 1 OS=Cricetulus griseus GN=I79_005097 PE=4 SV=1	CRIGR	2
	1281	1043	3.69	3.69	22.22	17.9	12.35	tr|G3I7K5|G3I7K5_CRIGR	Sorting nexin-12 OS=Cricetulus griseus GN=I79_019497 PE=4 SV=1	CRIGR	2
	1282	1044	3.68	3.68	42.45	23.58	23.58	tr|G3H1Z3|G3H1Z3_CRIGR	ATPase inhibitor, mitochondrial OS=Cricetulus griseus GN=I79_004192 PE=4 SV=1	CRIGR	2
	1283	1045	3.67	3.67	44.52	29.68	16.13	tr|G3I8Z5|G3I8Z5_CRIGR	Sulfiredoxin OS=Cricetulus griseus GN=I79_020028 PE=3 SV=1	CRIGR	2
	1284	1046	3.67	3.67	42.7	42.7	34.83	tr|G3I2F5|G3I2F5_CRIGR	Barrier-to-autointegration factor OS=Cricetulus griseus GN=I79_017597 PE=4 SV=1	CRIGR	2
	1285	1047	3.65	3.65	14.29	7.44	7.44	tr|G3H9S1|G3H9S1_CRIGR	E3 ubiquitin-protein ligase RING2 OS=Cricetulus griseus GN=I79_007151 PE=4 SV=1	CRIGR	2
	1286	1048	3.64	3.64	24.86	14.92	14.92	tr|G3IH72|G3IH72_CRIGR	Ribosome maturation protein SBDS OS=Cricetulus griseus GN=I79_023156 PE=4 SV=1	CRIGR	2
	1287	1050	3.63	3.63	18.89	18.89	14.75	tr|G3I0X5|G3I0X5_CRIGR	Epoxide hydrolase 1 OS=Cricetulus griseus GN=I79_017017 PE=4 SV=1	CRIGR	2
	1288	1051	3.62	3.62	25.2	15.75	15.75	tr|G3I6W5|G3I6W5_CRIGR	Prefoldin subunit 6 OS=Cricetulus griseus GN=I79_019243 PE=4 SV=1	CRIGR	2
	1289	1052	3.61	3.61	8.065	4.329	2.716	tr|G3H3I2|G3H3I2_CRIGR	Importin-9 OS=Cricetulus griseus GN=I79_004830 PE=4 SV=1	CRIGR	2
	1290	1054	3.61	3.61	11.23	10.14	10.14	tr|G3HF76|G3HF76_CRIGR	DAZ-associated protein 1 OS=Cricetulus griseus GN=I79_009232 PE=4 SV=1	CRIGR	2
	1291	1055	3.6	3.6	20.09	8.036	6.027	tr|G3HAR4|G3HAR4_CRIGR	Cysteine desulfurase, mitochondrial OS=Cricetulus griseus GN=I79_007522 PE=3 SV=1	CRIGR	2
	1292	1056	3.59	3.59	22.64	22.64	18.24	tr|J9T0K1|J9T0K1_CRIGR	Niemann-Pick type C2 protein (Fragment) OS=Cricetulus griseus GN=NPC2 PE=2 SV=1	CRIGR	2
	1293	1056	0	3.59	24.16	24.16	19.46	tr|G3I936|G3I936_CRIGR	Epididymal secretory protein E1 OS=Cricetulus griseus GN=I79_020069 PE=4 SV=1	CRIGR	2
	1294	1057	3.58	3.58	15.28	15.28	6.742	tr|G3HVD1|G3HVD1_CRIGR	Putative uncharacterized protein OS=Cricetulus griseus GN=I79_014918 PE=3 SV=1	CRIGR	2
	1295	1059	3.55	3.55	18.32	18.32	15.18	tr|Q6E6J6|Q6E6J6_CRIGR	Chromobox protein-like 5 OS=Cricetulus griseus GN=HP1 alpha PE=2 SV=1	CRIGR	2
	1296	1061	3.54	3.54	18.35	18.35	18.35	tr|G3H7C1|G3H7C1_CRIGR	Glia maturation factor beta OS=Cricetulus griseus GN=I79_006250 PE=4 SV=1	CRIGR	2
	1297	1062	3.53	3.54	19.52	8.904	6.507	tr|G3HV83|G3HV83_CRIGR	Prefoldin subunit 3 OS=Cricetulus griseus GN=I79_014862 PE=4 SV=1	CRIGR	2
	1298	1063	3.51	3.51	14.38	11.11	11.11	tr|G3HN89|G3HN89_CRIGR	Palmitoyl-protein thioesterase 1 OS=Cricetulus griseus GN=I79_012225 PE=4 SV=1	CRIGR	2
	1299	1065	3.49	3.49	9.494	7.278	7.278	tr|G3IMX7|G3IMX7_CRIGR	Bifunctional 3'-phosphoadenosine 5'-phosphosulfate synthetase 1 OS=Cricetulus griseus GN=I79_025282 PE=4 SV=1	CRIGR	2
	1300	1067	0	2.36	20.58	6.859	6.859	tr|Q6JH80|Q6JH80_CRIGR	Caspase 3 OS=Cricetulus griseus GN=CASP3 PE=2 SV=1	CRIGR	2
	1301	1068	3.48	3.48	26.38	17.79	17.79	tr|G3I7W4|G3I7W4_CRIGR	Dynactin subunit 1 OS=Cricetulus griseus GN=I79_019613 PE=4 SV=1	CRIGR	2
	1302	1069	3.46	3.46	14	3.071	1.949	tr|G3HRJ2|G3HRJ2_CRIGR	182 kDa tankyrase-1-binding protein OS=Cricetulus griseus GN=I79_013464 PE=4 SV=1	CRIGR	2
	1303	1070	3.46	3.46	11.78	8.224	5.047	tr|G3H4W2|G3H4W2_CRIGR	D-2-hydroxyglutarate dehydrogenase, mitochondrial OS=Cricetulus griseus GN=I79_005325 PE=4 SV=1	CRIGR	2
	1304	1073	3.44	3.44	40.36	33.13	10.24	tr|G3HKD0|G3HKD0_CRIGR	Peptidyl-prolyl cis-trans isomerase OS=Cricetulus griseus GN=I79_011150 PE=3 SV=1	CRIGR	2
	1305	1074	3.43	3.68	20.35	5.415	2.614	tr|G3HB11|G3HB11_CRIGR	Rho-associated protein kinase 2 OS=Cricetulus griseus GN=I79_007624 PE=4 SV=1	CRIGR	2
	1306	1076	3.41	3.58	10.47	2.81	1.916	tr|G3IA10|G3IA10_CRIGR	Heterogeneous nuclear ribonucleoprotein U-like protein 1 OS=Cricetulus griseus GN=I79_020426 PE=4 SV=1	CRIGR	2
	1307	1077	3.41	3.41	12.05	11.23	7.671	tr|G3HKP3|G3HKP3_CRIGR	Cytochrome b-c1 complex subunit 1, mitochondrial OS=Cricetulus griseus GN=I79_011272 PE=3 SV=1	CRIGR	2
	1308	1078	3.4	3.4	16.37	7.965	7.965	tr|G3HFP8|G3HFP8_CRIGR	KDEL motif-containing protein 2 OS=Cricetulus griseus GN=I79_009411 PE=4 SV=1	CRIGR	2
	1309	1079	3.39	4.48	13.22	10.92	4.598	tr|G3HDG6|G3HDG6_CRIGR	Paraspeckle component 1 OS=Cricetulus griseus GN=I79_008512 PE=4 SV=1	CRIGR	2
	1310	1081	3.36	3.36	9.593	8.293	5.528	tr|G3HBE7|G3HBE7_CRIGR	Acyl-CoA synthetase family member 2, mitochondrial OS=Cricetulus griseus GN=I79_007776 PE=4 SV=1	CRIGR	2
	1311	1082	3.34	3.34	28.11	14.29	14.29	tr|G3GX68|G3GX68_CRIGR	Nuclear protein localization protein 4-like OS=Cricetulus griseus GN=I79_002383 PE=4 SV=1	CRIGR	2
	1312	1083	3.33	3.33	15.02	8.946	6.39	tr|G3HRP3|G3HRP3_CRIGR	Citrate synthase OS=Cricetulus griseus GN=I79_013489 PE=3 SV=1	CRIGR	2
	1313	1084	3.33	3.33	7.216	7.216	7.216	tr|G3IHJ3|G3IHJ3_CRIGR	Ras-related GTP-binding protein A OS=Cricetulus griseus GN=I79_023283 PE=4 SV=1	CRIGR	2
	1314	1086	3.3	3.3	16.93	8.352	6.321	tr|G3HJW9|G3HJW9_CRIGR	5'-nucleotidase domain-containing protein 1 OS=Cricetulus griseus GN=I79_010972 PE=4 SV=1	CRIGR	2
	1315	1087	3.3	3.3	26.53	18.88	13.27	tr|G3GU64|G3GU64_CRIGR	Heat shock protein beta-8 OS=Cricetulus griseus GN=I79_001216 PE=3 SV=1	CRIGR	2
	1316	1089	3.28	3.28	7.143	7.143	7.143	tr|G3GTV9|G3GTV9_CRIGR	Vacuolar protein sorting-associated protein 26B OS=Cricetulus griseus GN=I79_001098 PE=4 SV=1	CRIGR	2
	1317	1090	3.25	3.25	27.42	19.35	13.71	tr|G3H201|G3H201_CRIGR	Replication protein A 32 kDa subunit OS=Cricetulus griseus GN=I79_004200 PE=4 SV=1	CRIGR	2
	1318	1092	3.24	3.24	24.67	13.33	13.33	tr|G3IP00|G3IP00_CRIGR	Succinyl-CoA ligase [ADP-forming] subunit beta, mitochondrial OS=Cricetulus griseus GN=I79_025699 PE=4 SV=1	ADP-forming	2
	1319	1096	3.2	3.2	19.19	7.223	5.869	tr|G3H953|G3H953_CRIGR	KH domain-containing, RNA-binding, signal transduction-associated protein 1 OS=Cricetulus griseus GN=I79_006915 PE=4 SV=1	CRIGR	2
	1320	1097	3.19	3.23	20.97	13.13	9.217	tr|G3H337|G3H337_CRIGR	tRNA-nucleotidyltransferase 1, mitochondrial OS=Cricetulus griseus GN=I79_004645 PE=3 SV=1	CRIGR	2
	1321	1098	3.19	3.19	23.43	16.32	16.32	tr|G3HDE3|G3HDE3_CRIGR	Proteasome activator complex subunit 2 OS=Cricetulus griseus GN=I79_008547 PE=4 SV=1	CRIGR	2
	1322	1099	3.18	3.18	13.43	5.117	5.117	tr|G3I6S3|G3I6S3_CRIGR	Programmed cell death protein 4 OS=Cricetulus griseus GN=I79_019200 PE=4 SV=1	CRIGR	2
	1323	1102	3.17	3.17	22.88	8.997	8.997	tr|G3I5V3|G3I5V3_CRIGR	Short/branched chain specific acyl-CoA dehydrogenase, mitochondrial OS=Cricetulus griseus GN=I79_018861 PE=3 SV=1	CRIGR	2
	1324	1104	3.14	3.14	16.23	11.04	11.04	tr|G3HLD0|G3HLD0_CRIGR	Lactoylglutathione lyase OS=Cricetulus griseus GN=I79_011518 PE=4 SV=1	CRIGR	2
	1325	1107	3.13	3.13	26.83	21.95	21.95	tr|G3IP80|G3IP80_CRIGR	Acyl-protein thioesterase 2 OS=Cricetulus griseus GN=I79_025784 PE=4 SV=1	CRIGR	2
	1326	1108	3.13	3.13	16.9	12.68	12.68	tr|G3HFP0|G3HFP0_CRIGR	Adrenodoxin, mitochondrial OS=Cricetulus griseus GN=I79_009403 PE=4 SV=1	CRIGR	2
	1327	1109	3.12	3.13	22.37	22.37	22.37	tr|G3GY95|G3GY95_CRIGR	Eukaryotic translation initiation factor 5A-1 OS=Cricetulus griseus GN=I79_002768 PE=4 SV=1	CRIGR	2
	1328	1110	3.11	3.11	22.54	13.11	10.25	tr|G3HRF0|G3HRF0_CRIGR	Polyadenylate-binding protein 2 OS=Cricetulus griseus GN=I79_013417 PE=4 SV=1	CRIGR	2
	1329	1111	3.11	3.11	11.19	11.19	11.19	tr|G3IIB5|G3IIB5_CRIGR	Secretory carrier-associated membrane protein 2 (Fragment) OS=Cricetulus griseus GN=I79_023583 PE=4 SV=1	CRIGR	2
	1330	1112	3.1	3.1	12	12	8.8	tr|G3I2M2|G3I2M2_CRIGR	Phosphoserine phosphatase OS=Cricetulus griseus GN=I79_017662 PE=4 SV=1	CRIGR	2
	1331	1113	3.09	3.09	22.77	14.73	10.71	tr|G3IFX0|G3IFX0_CRIGR	Programmed cell death protein 6 OS=Cricetulus griseus GN=I79_022645 PE=4 SV=1	CRIGR	2
	1332	1114	3.09	3.09	13.16	13.16	13.16	tr|G3GUK0|G3GUK0_CRIGR	Putative fructose-2,6-bisphosphatase TIGAR OS=Cricetulus griseus GN=I79_001362 PE=4 SV=1	CRIGR	2
	1333	1117	3.05	3.05	12.84	7.514	4.235	tr|G3H8F2|G3H8F2_CRIGR	Acylamino-acid-releasing enzyme OS=Cricetulus griseus GN=I79_006652 PE=4 SV=1	CRIGR	2
	1334	1118	3.05	3.05	10.02	5.594	5.594	tr|G3H3D3|G3H3D3_CRIGR	Branched-chain-amino-acid aminotransferase OS=Cricetulus griseus GN=I79_004748 PE=3 SV=1	CRIGR	2
	1335	1119	3.04	3.04	13.99	6.218	6.218	tr|G3I5A2|G3I5A2_CRIGR	Exosome complex exonuclease RRP45 OS=Cricetulus griseus GN=I79_018647 PE=4 SV=1	CRIGR	2
	1336	1121	3.03	3.03	14.78	6.65	6.65	tr|G3HUK8|G3HUK8_CRIGR	NIF3-like protein 1 OS=Cricetulus griseus GN=I79_014620 PE=4 SV=1	CRIGR	2
	1337	1123	3	3	37.36	18.49	15.09	tr|G3HEP7|G3HEP7_CRIGR	Catechol O-methyltransferase OS=Cricetulus griseus GN=I79_009035 PE=4 SV=1	CRIGR	2
	1338	1124	2.97	2.97	34.66	18.75	18.75	tr|G3HWB8|G3HWB8_CRIGR	Superoxide dismutase OS=Cricetulus griseus GN=I79_015272 PE=3 SV=1	CRIGR	2
	1339	1125	2.96	2.96	22.01	9.434	9.434	tr|G3HUM1|G3HUM1_CRIGR	F-box only protein 6 OS=Cricetulus griseus GN=I79_014633 PE=4 SV=1	CRIGR	2
	1340	1128	2.93	2.93	9.074	6.427	3.403	tr|G3H1Y2|G3H1Y2_CRIGR	YTH domain family protein 2 OS=Cricetulus griseus GN=I79_004174 PE=4 SV=1	CRIGR	2
	1341	1129	2.91	2.91	20.75	6.355	4.299	tr|G3GX17|G3GX17_CRIGR	Polypeptide N-acetylgalactosaminyltransferase 2 OS=Cricetulus griseus GN=I79_002304 PE=3 SV=1	CRIGR	2
	1342	1131	2.9	2.9	44.35	16.94	12.1	tr|G3H4A5|G3H4A5_CRIGR	U6 snRNA-associated Sm-like protein LSm4 OS=Cricetulus griseus GN=I79_005105 PE=4 SV=1	CRIGR	2
	1343	1132	2.89	2.89	14.58	9.913	9.913	tr|G3I5F0|G3I5F0_CRIGR	COP9 signalosome complex subunit 6 OS=Cricetulus griseus GN=I79_018695 PE=4 SV=1	CRIGR	2
	1344	1133	2.88	2.88	19.31	12.88	12.88	tr|G3I3V3|G3I3V3_CRIGR	Coproporphyrinogen-III oxidase, mitochondrial OS=Cricetulus griseus GN=I79_018121 PE=4 SV=1	CRIGR	2
	1345	1134	2.88	2.88	6.003	3.259	3.259	tr|G3HAI3|G3HAI3_CRIGR	Follistatin-related protein 1 OS=Cricetulus griseus GN=I79_007438 PE=4 SV=1	CRIGR	2
	1346	1137	2.86	2.86	4.012	2.508	2.508	tr|G3HAR3|G3HAR3_CRIGR	RNA-binding protein 12 OS=Cricetulus griseus GN=I79_007521 PE=4 SV=1	CRIGR	2
	1347	1138	2.85	2.86	12.62	4.113	3.121	tr|G3I7I9|G3I7I9_CRIGR	Dolichyl-diphosphooligosaccharide--protein glycosyltransferase subunit STT3A OS=Cricetulus griseus GN=I79_019480 PE=4 SV=1	CRIGR	2
	1348	1147	2.79	2.79	20.75	5.503	5.503	tr|G3H7M2|G3H7M2_CRIGR	DNA ligase 1 OS=Cricetulus griseus GN=I79_006356 PE=3 SV=1	CRIGR	2
	1349	1148	2.79	2.79	19.09	19.09	19.09	tr|G3GYB7|G3GYB7_CRIGR	Proteasome subunit beta type-6 OS=Cricetulus griseus GN=I79_002792 PE=3 SV=1	CRIGR	2
	1350	1149	2.78	2.78	24.32	7.508	7.508	tr|G3INC5|G3INC5_CRIGR	Cathepsin L1 OS=Cricetulus griseus GN=I79_025440 PE=3 SV=1	CRIGR	2
	1351	1150	2.78	2.78	21.05	15.79	15.79	tr|G3HAN1|G3HAN1_CRIGR	Charged multivesicular body protein 4b OS=Cricetulus griseus GN=I79_007487 PE=4 SV=1	CRIGR	2
	1352	1151	2.75	2.75	26.49	7.102	4.607	tr|G3HI03|G3HI03_CRIGR	U4/U6 small nuclear ribonucleoprotein Prp4 OS=Cricetulus griseus GN=I79_010265 PE=4 SV=1	CRIGR	2
	1353	1152	2.75	2.75	16.27	6.824	6.824	tr|G3HV49|G3HV49_CRIGR	UPF0160 protein MYG1, mitochondrial OS=Cricetulus griseus GN=I79_014826 PE=4 SV=1	CRIGR	2
	1354	1153	2.74	2.74	23.67	16.57	16.57	tr|G3HND9|G3HND9_CRIGR	Putative RNA-binding protein 3 OS=Cricetulus griseus GN=I79_012278 PE=4 SV=1	CRIGR	2
	1355	1153	0	2.74	25.64	17.95	17.95	tr|D5FGC9|D5FGC9_CRIGR	RNA-binding motif 3 OS=Cricetulus griseus PE=2 SV=1	CRIGR	2
	1356	1154	2.72	2.72	10.07	7.347	3.81	tr|G3I0J3|G3I0J3_CRIGR	Alpha-adducin OS=Cricetulus griseus GN=I79_016879 PE=4 SV=1	CRIGR	2
	1357	1155	0.01	2.02	28.91	5.859	5.859	tr|G3I9B3|G3I9B3_CRIGR	cAMP-dependent protein kinase type II-beta regulatory subunit OS=Cricetulus griseus GN=I79_020150 PE=4 SV=1	CRIGR	2
	1358	1156	2.7	2.7	6.357	6.357	6.357	tr|G3GTS4|G3GTS4_CRIGR	Zinc finger protein 207 OS=Cricetulus griseus GN=I79_001063 PE=4 SV=1	CRIGR	2
	1359	1157	2.69	2.69	17.33	7.178	7.178	tr|G3HDW6|G3HDW6_CRIGR	Succinate-semialdehyde dehydrogenase, mitochondrial OS=Cricetulus griseus GN=I79_008733 PE=3 SV=1	CRIGR	2
	1360	1158	2.68	2.68	11.02	3.277	2.483	tr|G3HEN3|G3HEN3_CRIGR	Protein HIRA OS=Cricetulus griseus GN=I79_009022 PE=4 SV=1	CRIGR	2
	1361	1159	2.67	2.67	23.73	23.73	23.73	tr|G3IQ56|G3IQ56_CRIGR	ATP-dependent RNA helicase DHX8 OS=Cricetulus griseus GN=I79_026147 PE=4 SV=1	CRIGR	2
	1362	1162	2.65	2.65	13.91	13.91	13.91	tr|G3HY08|G3HY08_CRIGR	Macrophage migration inhibitory factor OS=Cricetulus griseus GN=I79_015933 PE=4 SV=1	CRIGR	2
	1363	1163	2.64	2.64	23.43	4.848	4.848	tr|G3HE38|G3HE38_CRIGR	Protein arginine N-methyltransferase 3 OS=Cricetulus griseus GN=I79_008810 PE=4 SV=1	CRIGR	2
	1364	1164	2.64	2.64	23.16	23.16	23.16	tr|G3IH36|G3IH36_CRIGR	Small ubiquitin-related modifier 2 OS=Cricetulus griseus GN=I79_023115 PE=4 SV=1	CRIGR	2
	1365	1164	0	2.64	23.16	23.16	23.16	sp|Q6LDZ8|SUMO2_CRIGR	Small ubiquitin-related modifier 2 OS=Cricetulus griseus GN=SUMO2 PE=3 SV=1	CRIGR	2
	1366	1165	2.63	2.63	12.79	5.451	5.451	tr|G3H8N4|G3H8N4_CRIGR	Lactase-like protein OS=Cricetulus griseus GN=I79_006744 PE=3 SV=1	CRIGR	2
	1367	1166	2.63	2.63	7.484	4.14	4.14	tr|G3HGR7|G3HGR7_CRIGR	Transmembrane 9 superfamily member 2 (Fragment) OS=Cricetulus griseus GN=I79_009807 PE=4 SV=1	CRIGR	2
	1368	1169	2.61	2.61	14.58	7.083	7.083	tr|G3H397|G3H397_CRIGR	RAC-alpha serine/threonine-protein kinase OS=Cricetulus griseus GN=I79_004712 PE=4 SV=1	CRIGR	2
	1369	1170	2.61	2.61	18.16	6.983	6.983	tr|G3GZ21|G3GZ21_CRIGR	Peroxisomal 3,2-trans-enoyl-CoA isomerase OS=Cricetulus griseus GN=I79_003072 PE=4 SV=1	CRIGR	2
	1370	1171	2.61	2.61	14.21	6.273	2.768	tr|G3GTC9|G3GTC9_CRIGR	Phosphoacetylglucosamine mutase OS=Cricetulus griseus GN=I79_000908 PE=3 SV=1	CRIGR	2
	1371	1172	2.61	2.61	18.13	10.63	7.5	tr|G3HV63|G3HV63_CRIGR	Pyrroline-5-carboxylate reductase OS=Cricetulus griseus GN=I79_014840 PE=3 SV=1	CRIGR	2
	1372	1175	2.6	2.6	43.68	31.03	31.03	tr|G3HHA3|G3HHA3_CRIGR	40S ribosomal protein S24 OS=Cricetulus griseus GN=I79_010001 PE=3 SV=1	CRIGR	2
	1373	1177	2.58	2.7	27.87	27.05	10.66	tr|G3I071|G3I071_CRIGR	60S ribosomal protein L35 OS=Cricetulus griseus GN=I79_016748 PE=3 SV=1	CRIGR	2
	1374	1177	0	2.7	27.64	26.83	10.57	tr|G3HZI1|G3HZI1_CRIGR	60S ribosomal protein L35 OS=Cricetulus griseus GN=I79_016485 PE=3 SV=1	CRIGR	2
	1375	1178	2.58	2.58	19.6	19.6	19.6	tr|G3IGT5|G3IGT5_CRIGR	Sjoegren syndrome/scleroderma autoantigen 1 OS=Cricetulus griseus GN=I79_023011 PE=4 SV=1	CRIGR	2
	1376	1183	2.55	2.55	27.36	18.87	13.21	tr|G3IKN5|G3IKN5_CRIGR	Glutathione S-transferase omega-1 OS=Cricetulus griseus GN=I79_024438 PE=3 SV=1	CRIGR	2
	1377	1184	2.54	2.54	11.47	3.425	3.425	tr|G3HIY9|G3HIY9_CRIGR	Glutamate--cysteine ligase catalytic subunit OS=Cricetulus griseus GN=I79_010621 PE=4 SV=1	CRIGR	2
	1378	1188	2.51	2.51	6.064	3.298	2.234	tr|G3H8G1|G3H8G1_CRIGR	Ubiquitin carboxyl-terminal hydrolase OS=Cricetulus griseus GN=I79_006661 PE=3 SV=1	CRIGR	2
	1379	1195	2.45	2.45	25	8.088	8.088	tr|G3I8K9|G3I8K9_CRIGR	Signal recognition particle 54 kDa protein OS=Cricetulus griseus GN=I79_019885 PE=4 SV=1	CRIGR	2
	1380	1202	2.41	2.41	13.4	13.4	11.8	tr|G3HQA3|G3HQA3_CRIGR	Arfaptin-1 OS=Cricetulus griseus GN=I79_012999 PE=4 SV=1	CRIGR	2
	1381	1207	2.37	2.37	13.2	2.587	2.587	tr|G3I0R8|G3I0R8_CRIGR	Actin-binding protein anillin OS=Cricetulus griseus GN=I79_016957 PE=4 SV=1	CRIGR	2
	1382	1211	2.36	2.36	21.56	4.192	4.192	tr|G3HYZ0|G3HYZ0_CRIGR	Pleckstrin-likey-like domain family B member 3 OS=Cricetulus griseus GN=I79_016283 PE=4 SV=1	CRIGR	2
	1383	1223	2.3	2.3	12.81	7.187	7.187	tr|G3I245|G3I245_CRIGR	Integrin-linked kinase-associated serine/threonine phosphatase 2C OS=Cricetulus griseus GN=I79_017464 PE=4 SV=1	CRIGR	2
	1384	1231	2.26	2.45	32.73	14.09	11.36	tr|G3HMM2|G3HMM2_CRIGR	Peptidyl-prolyl cis-trans isomerase OS=Cricetulus griseus GN=I79_011990 PE=3 SV=1	CRIGR	2
	1385	1233	2.24	2.24	13.27	8.929	6.122	tr|G3H892|G3H892_CRIGR	Aminoacylase-1A OS=Cricetulus griseus GN=I79_006592 PE=4 SV=1	CRIGR	2
	1386	1234	2.24	2.24	21.38	11.03	6.207	tr|G3I5U5|G3I5U5_CRIGR	AP-2 complex subunit sigma OS=Cricetulus griseus GN=I79_018853 PE=4 SV=1	CRIGR	2
	1387	1236	2.24	2.24	8.312	8.312	8.312	tr|G3HQY6|G3HQY6_CRIGR	Lipase OS=Cricetulus griseus GN=I79_013245 PE=3 SV=1	CRIGR	2
	1388	1250	2.16	2.16	26.92	16.67	12.18	tr|G3IPB7|G3IPB7_CRIGR	Golgi SNAP receptor complex member 2 OS=Cricetulus griseus GN=I79_025823 PE=4 SV=1	CRIGR	2
	1389	1267	2.11	4.5	30.41	30.41	21.62	tr|G3I403|G3I403_CRIGR	Serine/threonine-protein phosphatase PP1-alpha catalytic subunit OS=Cricetulus griseus GN=I79_018174 PE=4 SV=1	CRIGR	2
	1390	1268	2.11	2.12	18.86	8.418	8.418	tr|G3GTU8|G3GTU8_CRIGR	Notchless protein-like 1 OS=Cricetulus griseus GN=I79_001087 PE=4 SV=1	CRIGR	2
	1391	1293	2.05	2.07	17.46	2.698	2.698	tr|G3GVW1|G3GVW1_CRIGR	Protein transport protein Sec23B OS=Cricetulus griseus GN=I79_001865 PE=4 SV=1	CRIGR	2
	1392	1297	2.05	2.05	23.6	11.18	11.18	tr|G3I7I5|G3I7I5_CRIGR	Ribose-5-phosphate isomerase OS=Cricetulus griseus GN=I79_019476 PE=4 SV=1	CRIGR	2
	1393	1321	2.02	4.03	16.61	3.691	3.691	tr|G3HP12|G3HP12_CRIGR	Merlin OS=Cricetulus griseus GN=I79_012515 PE=4 SV=1	CRIGR	2
	1394	1341	2.01	4.07	27.7	12.59	9.712	tr|G3H7Q5|G3H7Q5_CRIGR	Glyceraldehyde-3-phosphate dehydrogenase OS=Cricetulus griseus GN=I79_006391 PE=3 SV=1	CRIGR	2
	1395	1342	2.01	2.79	10.26	3.771	3.771	tr|G3HZ33|G3HZ33_CRIGR	Serine/threonine-protein phosphatase 4 regulatory subunit 1 OS=Cricetulus griseus GN=I79_016328 PE=4 SV=1	CRIGR	2
	1396	1361	0	4.24	47.31	38.71	29.03	tr|G3HVL6|G3HVL6_CRIGR	60S ribosomal protein L32 OS=Cricetulus griseus GN=I79_015014 PE=4 SV=1	CRIGR	2
	1397	1361	0	4	37.04	28.4	28.4	tr|G3I3F0|G3I3F0_CRIGR	60S ribosomal protein L32 OS=Cricetulus griseus GN=I79_017955 PE=4 SV=1	CRIGR	2
	1398	1365	2	4.3	21.88	12.24	7.529	tr|G3IBK9|G3IBK9_CRIGR	Rab GDP dissociation inhibitor alpha OS=Cricetulus griseus GN=I79_021035 PE=4 SV=1	CRIGR	2
	1399	1367	2	4	15.64	9.479	9.479	tr|G3HYI7|G3HYI7_CRIGR	Splicing factor U2AF 65 kDa subunit OS=Cricetulus griseus GN=I79_016120 PE=4 SV=1	CRIGR	2
	1400	1368	2	4	20.39	20.39	20.39	tr|G3I0Z2|G3I0Z2_CRIGR	Alpha-soluble NSF attachment protein OS=Cricetulus griseus GN=I79_017035 PE=4 SV=1	CRIGR	2
	1401	1369	0	2	24.05	24.05	24.05	tr|G3GVL9|G3GVL9_CRIGR	60S ribosomal protein L30 OS=Cricetulus griseus GN=I79_001761 PE=4 SV=1	CRIGR	2
	1402	1370	2	3.37	37.08	37.08	37.08	tr|G3H1E5|G3H1E5_CRIGR	Dynein light chain 2, cytoplasmic OS=Cricetulus griseus GN=I79_003970 PE=4 SV=1	CRIGR	2
	1403	1371	2	3.26	19.11	9.256	7.847	tr|G3HHC3|G3HHC3_CRIGR	Importin subunit alpha OS=Cricetulus griseus GN=I79_010021 PE=3 SV=1	CRIGR	2
	1404	1406	2	2	33.33	21.33	21.33	tr|G3HNV5|G3HNV5_CRIGR	U6 snRNA-associated Sm-like protein LSm8 OS=Cricetulus griseus GN=I79_012449 PE=4 SV=1	CRIGR	2
	1405	1417	2	2	31.03	31.03	31.03	tr|G3IPK2|G3IPK2_CRIGR	Protein FAM49B OS=Cricetulus griseus GN=I79_025915 PE=4 SV=1	CRIGR	2
	1406	1451	1.92	1.92	24.87	24.87	10.05	tr|G3IJQ6|G3IJQ6_CRIGR	Pre-mRNA-processing-splicing factor 8 OS=Cricetulus griseus GN=I79_024092 PE=4 SV=1	CRIGR	2
	1407	1452	1.9	1.9	20.16	6.452	6.452	tr|G3GTG7|G3GTG7_CRIGR	NADPH:adrenodoxin oxidoreductase, mitochondrial OS=Cricetulus griseus GN=I79_000951 PE=4 SV=1	CRIGR	2
	1408	1460	1.86	1.86	20.18	11.21	11.21	tr|G3HX42|G3HX42_CRIGR	Translation initiation factor eIF-2B subunit alpha OS=Cricetulus griseus GN=I79_015559 PE=3 SV=1	CRIGR	2
	1409	1463	1.83	1.83	29.38	10.82	10.82	tr|G3I075|G3I075_CRIGR	L-asparaginase OS=Cricetulus griseus GN=I79_016752 PE=4 SV=1	CRIGR	2
	1410	1468	1.82	1.82	10.64	4.449	4.449	tr|G3HXT1|G3HXT1_CRIGR	ADP-ribosylation factor GTPase-activating protein 3 OS=Cricetulus griseus GN=I79_015845 PE=4 SV=1	CRIGR	2
	1411	1474	1.8	1.8	15.77	4.48	4.48	tr|G3H5Z5|G3H5Z5_CRIGR	Cleavage stimulation factor 64 kDa subunit OS=Cricetulus griseus GN=I79_005744 PE=4 SV=1	CRIGR	2
	1412	1488	1.72	1.72	12.58	3.564	3.564	tr|G3HHG7|G3HHG7_CRIGR	5'-AMP-activated protein kinase catalytic subunit alpha-1 (Fragment) OS=Cricetulus griseus GN=I79_010068 PE=4 SV=1	CRIGR	2
	1413	1490	1.7	2.14	63.64	63.64	53.25	tr|G3ILM1|G3ILM1_CRIGR	Cysteine-rich protein 1 OS=Cricetulus griseus GN=I79_024790 PE=4 SV=1	CRIGR	2
	1414	1494	1.67	1.67	11.89	5.03	3.354	tr|G3HAT2|G3HAT2_CRIGR	NMDA receptor-regulated protein 1 OS=Cricetulus griseus GN=I79_007540 PE=4 SV=1	CRIGR	2
	1415	1503	1.62	1.62	16.22	9.145	9.145	tr|G3I4P0|G3I4P0_CRIGR	Craniofacial development protein 1 OS=Cricetulus griseus GN=I79_018423 PE=4 SV=1	CRIGR	2
	1416	1504	1.62	1.62	16.67	9.722	9.722	tr|G3I8H8|G3I8H8_CRIGR	DnaJ-like subfamily A member 2 OS=Cricetulus griseus GN=I79_019851 PE=4 SV=1	CRIGR	2
	1417	1508	1.61	1.61	13.45	10.55	10.55	tr|G3I3K9|G3I3K9_CRIGR	DNA-directed RNA polymerase II subunit RPB3 OS=Cricetulus griseus GN=I79_018018 PE=4 SV=1	CRIGR	2
	1418	1509	1.6	1.6	12.94	6.776	6.776	tr|G3HMA2|G3HMA2_CRIGR	DNA polymerase delta subunit 2 OS=Cricetulus griseus GN=I79_011853 PE=4 SV=1	CRIGR	2
	1419	1514	1.56	1.56	3.89	3.89	3.89	tr|G3HBR6|G3HBR6_CRIGR	Phosphoglycolate phosphatase OS=Cricetulus griseus GN=I79_007975 PE=4 SV=1	CRIGR	2
	1420	1521	1.51	1.93	34.76	15.24	15.24	tr|G3I3Y7|G3I3Y7_CRIGR	Glutathione S-transferase P 2 OS=Cricetulus griseus GN=I79_018158 PE=3 SV=1	CRIGR	2
	1421	1527	1.47	2.75	9.714	9.714	9.714	tr|G3IMU0|G3IMU0_CRIGR	ADP-ribosylation factor 6 OS=Cricetulus griseus GN=I79_025237 PE=3 SV=1	CRIGR	2
	1422	1530	1.46	1.47	7.194	3.597	3.597	tr|G3HTV9|G3HTV9_CRIGR	Acyl-coenzyme A oxidase OS=Cricetulus griseus GN=I79_014341 PE=3 SV=1	CRIGR	2
	1423	1531	1.45	2.25	15.78	3.191	3.191	tr|G3HPY5|G3HPY5_CRIGR	U4/U6.U5 tri-snRNP-associated protein 2 OS=Cricetulus griseus GN=I79_012871 PE=4 SV=1	CRIGR	2
	1424	1538	1.41	3.66	15.71	8.046	4.789	tr|G3HQK5|G3HQK5_CRIGR	UDP-N-acetylhexosamine pyrophosphorylase OS=Cricetulus griseus GN=I79_013109 PE=4 SV=1	CRIGR	2
	1425	1548	1.34	1.34	24.45	6.204	6.204	tr|G3I4K4|G3I4K4_CRIGR	Copper chaperone for superoxide dismutase OS=Cricetulus griseus GN=I79_018386 PE=4 SV=1	CRIGR	2
	1426	1557	1.29	2.63	13.41	5.488	5.488	tr|G3HLK9|G3HLK9_CRIGR	Coiled-coil domain-containing protein 43 OS=Cricetulus griseus GN=I79_011599 PE=4 SV=1	CRIGR	2
	1427	1578	1.19	2.07	4.399	4.399	4.399	tr|G3I021|G3I021_CRIGR	THO complex subunit 6-like OS=Cricetulus griseus GN=I79_016724 PE=4 SV=1	CRIGR	2
	1428	1588	1.15	1.15	14.78	12.03	8.935	tr|G3GTC7|G3GTC7_CRIGR	Malic enzyme (Fragment) OS=Cricetulus griseus GN=I79_000906 PE=3 SV=1	CRIGR	2
	1429	1598	1.11	1.11	6.571	6.571	6.571	tr|G3I4A7|G3I4A7_CRIGR	Bifunctional methylenetetrahydrofolate dehydrogenase/cyclohydrolase, mitochondrial OS=Cricetulus griseus GN=I79_018284 PE=3 SV=1	CRIGR	2
	1430	1621	1.02	2.32	7.44	2.144	2.144	tr|G3H8H7|G3H8H7_CRIGR	DnaJ-like subfamily C member 10 OS=Cricetulus griseus GN=I79_006677 PE=4 SV=1	CRIGR	2
	1431	1638	0.02	0.04	6.67	0.1527	0.05274	RRRRRtr|G3HAC6|G3HAC6_CRIGR	REVERSED Titin OS=Cricetulus griseus GN=I79_007374 PE=4 SV=1	CRIGR	2
	1432	1647	0.93	3.39	15.41	10.54	8.919	tr|G3I391|G3I391_CRIGR	Actin-related protein 2/3 complex subunit 1A OS=Cricetulus griseus GN=I79_017892 PE=4 SV=1	CRIGR	2
	1433	1521	1.51	1.93	34.76	15.24	15.24	tr|G3I3Y7|G3I3Y7_CRIGR	Glutathione S-transferase P 2 OS=Cricetulus griseus GN=I79_018158 PE=3 SV=1	CRIGR	2
	1434	1677	0.85	2.25	7.318	0.8812	0.6513	tr|G3H4J1|G3H4J1_CRIGR	E3 ubiquitin-protein ligase HECTD1 OS=Cricetulus griseus GN=I79_005194 PE=4 SV=1	CRIGR	2
	1435	1683	0	2.94	24.04	24.04	24.04	tr|G3I3P7|G3I3P7_CRIGR	Cytochrome c, somatic OS=Cricetulus griseus GN=I79_018057 PE=3 SV=1	CRIGR	2
	1436	1721	0.71	1.47	12.82	2.498	1.332	tr|G3HQ70|G3HQ70_CRIGR	Liprin-alpha-1 OS=Cricetulus griseus GN=I79_012964 PE=4 SV=1	CRIGR	2
	1437	943	4.16	4.16	17.23	8.738	6.796	tr|G3HXA2|G3HXA2_CRIGR	Basic leucine zipper and W2 domain-containing protein 2 OS=Cricetulus griseus GN=I79_015621 PE=4 SV=1	CRIGR	2
	1438	1765	0.62	2.99	27.84	15.91	12.5	tr|G3HQR7|G3HQR7_CRIGR	60S ribosomal protein L18a OS=Cricetulus griseus GN=I79_013173 PE=3 SV=1	CRIGR	2
	1439	1789	0	1.34	36.28	22.12	22.12	tr|G3IEY4|G3IEY4_CRIGR	U2 small nuclear ribonucleoprotein B'' OS=Cricetulus griseus GN=I79_022290 PE=4 SV=1	CRIGR	2
	1440	1851	0.45	4.21	20.9	8.842	3.055	tr|G3I2F0|G3I2F0_CRIGR	Kinesin light chain 2 OS=Cricetulus griseus GN=I79_017592 PE=4 SV=1	CRIGR	2
	1441	1909	0.37	4.23	14.19	10.3	5.95	tr|G3GZ89|G3GZ89_CRIGR	Inosine-5'-monophosphate dehydrogenase OS=Cricetulus griseus GN=I79_003122 PE=3 SV=1	CRIGR	2
	1442	1942	0.34	5.09	27.72	27.72	13.59	tr|G3IBI0|G3IBI0_CRIGR	Ras-related protein Rap-1A OS=Cricetulus griseus GN=I79_021001 PE=4 SV=1	CRIGR	2
	1443	1638	0.02	0.04	6.67	0.1527	0.05274	RRRRRtr|G3HAC6|G3HAC6_CRIGR	REVERSED Titin OS=Cricetulus griseus GN=I79_007374 PE=4 SV=1	CRIGR	2
	1444	1721	0.71	1.47	12.82	2.498	1.332	tr|G3HQ70|G3HQ70_CRIGR	Liprin-alpha-1 OS=Cricetulus griseus GN=I79_012964 PE=4 SV=1	CRIGR	2
	1445	905	4.57	4.57	18.74	5.703	2.546	tr|G3HZ17|G3HZ17_CRIGR	Protein phosphatase 1 regulatory subunit 12A OS=Cricetulus griseus GN=I79_016312 PE=4 SV=1	CRIGR	2
	1446	2539	0.08	1.54	18.14	4.114	2.637	tr|G3IBJ1|G3IBJ1_CRIGR	Dynamin-1 OS=Cricetulus griseus GN=I79_021012 PE=3 SV=1	CRIGR	2
	1447	1074	3.43	3.68	20.35	5.415	2.614	tr|G3HB11|G3HB11_CRIGR	Rho-associated protein kinase 2 OS=Cricetulus griseus GN=I79_007624 PE=4 SV=1	CRIGR	2
	1448	2539	0.08	1.54	18.14	4.114	2.637	tr|G3IBJ1|G3IBJ1_CRIGR	Dynamin-1 OS=Cricetulus griseus GN=I79_021012 PE=3 SV=1	CRIGR	2
	1449	1527	1.47	2.75	9.714	9.714	9.714	tr|G3IMU0|G3IMU0_CRIGR	ADP-ribosylation factor 6 OS=Cricetulus griseus GN=I79_025237 PE=3 SV=1	CRIGR	2
	1450	1677	0.85	2.25	7.318	0.8812	0.6513	tr|G3H4J1|G3H4J1_CRIGR	E3 ubiquitin-protein ligase HECTD1 OS=Cricetulus griseus GN=I79_005194 PE=4 SV=1	CRIGR	2
	1451	2697	0.06	4.65	16.01	9.683	3.352	tr|G3GV34|G3GV34_CRIGR	Metastasis-associated protein MTA3 OS=Cricetulus griseus GN=I79_001564 PE=4 SV=1	CRIGR	2
	1452	935	0	2.35	36.36	25.45	11.82	tr|G3GT83|G3GT83_CRIGR	60S ribosomal protein L10 OS=Cricetulus griseus GN=I79_000858 PE=4 SV=1	CRIGR	1
	1453	1080	0	1.26	13.1	13.1	13.1	tr|G3HI52|G3HI52_CRIGR	Dynein light chain 1, cytoplasmic OS=Cricetulus griseus GN=I79_010319 PE=4 SV=1	CRIGR	1
	1454	1084	0	2	6.358	2.89	2.89	tr|G3HWV0|G3HWV0_CRIGR	Ras-related GTP-binding protein B OS=Cricetulus griseus GN=I79_015463 PE=4 SV=1	CRIGR	1
	1455	1115	3.08	3.08	26.94	13.59	3.155	tr|G3HI59|G3HI59_CRIGR	Short-chain specific acyl-CoA dehydrogenase, mitochondrial OS=Cricetulus griseus GN=I79_010326 PE=3 SV=1	CRIGR	1
	1456	1120	3.03	3.03	57.53	34.93	14.38	tr|G3H8Q4|G3H8Q4_CRIGR	Acidic leucine-rich nuclear phosphoprotein 32 family member A OS=Cricetulus griseus GN=I79_006764 PE=4 SV=1	CRIGR	1
	1457	1122	3.02	3.02	36.8	36.8	10.4	tr|G3I886|G3I886_CRIGR	TRM112-like protein OS=Cricetulus griseus GN=I79_019749 PE=4 SV=1	CRIGR	1
	1458	1136	2.86	2.86	15.82	3.68	1.84	tr|G3HP44|G3HP44_CRIGR	Kinesin-like protein KIF15 (Fragment) OS=Cricetulus griseus GN=I79_012548 PE=3 SV=1	CRIGR	1
	1459	1141	2.82	2.82	18.47	9.888	2.239	tr|G3I0Q0|G3I0Q0_CRIGR	Non-muscle caldesmon OS=Cricetulus griseus GN=I79_016939 PE=4 SV=1	CRIGR	1
	1460	1144	2.8	2.8	53.06	30.61	21.43	tr|G3IKQ6|G3IKQ6_CRIGR	Cystatin-B OS=Cricetulus griseus GN=I79_024459 PE=4 SV=1	CRIGR	1
	1461	1160	2.65	2.65	14.33	8.227	2.979	tr|G3HGU3|G3HGU3_CRIGR	Disabled-like 2 OS=Cricetulus griseus GN=I79_009834 PE=4 SV=1	CRIGR	1
	1462	1164	0	2	5.455	5.455	5.455	tr|G3H8Z7|G3H8Z7_CRIGR	Ubiquitin-conjugating enzyme E2 G2 (Fragment) OS=Cricetulus griseus GN=I79_006846 PE=4 SV=1	CRIGR	1
	1463	1179	2.57	2.57	17.3	8.649	3.604	tr|G3I8Z3|G3I8Z3_CRIGR	TBC1 domain family member 20 OS=Cricetulus griseus GN=I79_020027 PE=4 SV=1	CRIGR	1
	1464	1181	2.56	2.56	10.59	3.609	1.513	tr|G3H9N7|G3H9N7_CRIGR	Elongator complex protein 2 OS=Cricetulus griseus GN=I79_007115 PE=3 SV=1	CRIGR	1
	1465	1185	2.54	2.54	29.71	14.86	8.571	tr|G3HLS5|G3HLS5_CRIGR	Mitochondrial import receptor subunit TOM34 OS=Cricetulus griseus GN=I79_011669 PE=4 SV=1	CRIGR	1
	1466	1186	2.53	2.53	11.86	5.932	3.39	tr|G3GXB5|G3GXB5_CRIGR	Ethanolamine-phosphate cytidylyltransferase OS=Cricetulus griseus GN=I79_002405 PE=4 SV=1	CRIGR	1
	1467	1189	2.5	2.5	26.96	10.19	3.397	tr|G3I620|G3I620_CRIGR	Aspartyl aminopeptidase OS=Cricetulus griseus GN=I79_018931 PE=3 SV=1	CRIGR	1
	1468	1190	2.49	2.49	7.169	2.967	1.854	tr|G3HRA3|G3HRA3_CRIGR	ARF GTPase-activating protein GIT1 OS=Cricetulus griseus GN=I79_013368 PE=4 SV=1	CRIGR	1
	1469	1190	0	2.49	7.595	3.376	2.11	tr|G3HI72|G3HI72_CRIGR	ARF GTPase-activating protein GIT2 (Fragment) OS=Cricetulus griseus GN=I79_010339 PE=4 SV=1	CRIGR	1
	1470	1191	2.48	2.48	12.41	6.481	3.333	tr|G3GZD8|G3GZD8_CRIGR	Dedicator of cytokinesis protein 7 OS=Cricetulus griseus GN=I79_003201 PE=4 SV=1	CRIGR	1
	1471	1191	0.01	2.04	8.251	1.375	1.375	tr|G3IIY8|G3IIY8_CRIGR	Dedicator of cytokinesis protein 8 OS=Cricetulus griseus GN=I79_023818 PE=4 SV=1	CRIGR	1
	1472	1192	2.47	2.47	12.76	5.357	2.806	sp|P83337|OFUT1_CRIGR	GDP-fucose protein O-fucosyltransferase 1 OS=Cricetulus griseus GN=POFUT1 PE=1 SV=2	CRIGR	1
	1473	1193	2.46	2.46	47.81	15.79	3.947	tr|G3I0M2|G3I0M2_CRIGR	Platelet-activating factor acetylhydrolase IB subunit gamma OS=Cricetulus griseus GN=I79_016910 PE=4 SV=1	CRIGR	1
	1474	1194	2.45	2.45	18.46	4.579	3.102	tr|G3HUW2|G3HUW2_CRIGR	Striatin OS=Cricetulus griseus GN=I79_014730 PE=4 SV=1	CRIGR	1
	1475	1196	2.45	2.45	14.37	14.37	8.046	tr|G3HJA9|G3HJA9_CRIGR	Eukaryotic translation initiation factor 3 subunit K (Fragment) OS=Cricetulus griseus GN=I79_010751 PE=3 SV=1	CRIGR	1
	1476	1200	2.43	2.43	18.44	12.06	3.901	tr|G3HYU6|G3HYU6_CRIGR	DNA-directed RNA polymerases I and III subunit RPAC1 OS=Cricetulus griseus GN=I79_016238 PE=4 SV=1	CRIGR	1
	1477	1201	2.43	2.43	18.87	18.87	13.21	tr|G3H756|G3H756_CRIGR	Glutaredoxin-1 OS=Cricetulus griseus GN=I79_006182 PE=4 SV=1	CRIGR	1
	1478	1204	2.39	2.5	11.8	3.714	1.592	tr|G3I9F0|G3I9F0_CRIGR	General vesicular transport factor p115 OS=Cricetulus griseus GN=I79_020190 PE=4 SV=1	CRIGR	1
	1479	1205	2.39	2.39	11.21	3.341	1.078	tr|G3HCV0|G3HCV0_CRIGR	ATP-dependent RNA helicase DDX42 OS=Cricetulus griseus GN=I79_008317 PE=4 SV=1	CRIGR	1
	1480	1208	2.37	2.37	27.69	5.378	3.785	tr|G3GS78|G3GS78_CRIGR	DnaJ-like subfamily C member 3 OS=Cricetulus griseus GN=I79_000392 PE=4 SV=1	CRIGR	1
	1481	1212	2.36	2.36	19.55	5.489	3.087	tr|G3H277|G3H277_CRIGR	Tyrosine-protein phosphatase non-receptor type 11 OS=Cricetulus griseus GN=I79_004244 PE=4 SV=1	CRIGR	1
	1482	1213	2.34	2.46	23.15	23.15	8.333	tr|G3I8X0|G3I8X0_CRIGR	60S ribosomal protein L19 OS=Cricetulus griseus GN=I79_020002 PE=4 SV=1	CRIGR	1
	1483	1213	0	2.46	43.1	43.1	15.52	tr|G3H5K5|G3H5K5_CRIGR	60S ribosomal protein L19 OS=Cricetulus griseus GN=I79_005588 PE=4 SV=1	CRIGR	1
	1484	1214	2.34	2.34	44.64	26.19	7.143	tr|G3HTF5|G3HTF5_CRIGR	Phosphatidylinositol transfer protein alpha isoform OS=Cricetulus griseus GN=I79_014180 PE=4 SV=1	CRIGR	1
	1485	1215	2.34	2.34	9.554	4.671	2.548	tr|G3HCD3|G3HCD3_CRIGR	Phosphoglycerate mutase family member 5 OS=Cricetulus griseus GN=I79_008141 PE=4 SV=1	CRIGR	1
	1486	1216	2.34	2.34	5.623	5.623	3.423	tr|G3HEN9|G3HEN9_CRIGR	Septin-5 OS=Cricetulus griseus GN=I79_009027 PE=3 SV=1	CRIGR	1
	1487	1219	2.32	2.32	15.89	8.915	5.426	tr|G3HUW4|G3HUW4_CRIGR	Coiled-coil domain-containing protein 75 OS=Cricetulus griseus GN=I79_014733 PE=4 SV=1	CRIGR	1
	1488	1220	2.32	2.32	9.051	6.402	3.753	tr|G3HS69|G3HS69_CRIGR	DnaJ-like subfamily A member 3, mitochondrial OS=Cricetulus griseus GN=I79_013695 PE=3 SV=1	CRIGR	1
	1489	1225	2.29	2.29	34.29	18.57	8.571	tr|G3ICD3|G3ICD3_CRIGR	Lactadherin OS=Cricetulus griseus GN=I79_021326 PE=4 SV=1	CRIGR	1
	1490	1227	2.28	2.28	18.91	13	4.492	tr|G3GYV4|G3GYV4_CRIGR	Ribosome biogenesis protein WDR12 OS=Cricetulus griseus GN=Wdr12 PE=3 SV=1	CRIGR	1
	1491	1229	2.28	2.28	10.85	10.85	5.279	tr|G3H604|G3H604_CRIGR	Alpha-galactosidase A OS=Cricetulus griseus GN=I79_005753 PE=4 SV=1	CRIGR	1
	1492	1230	2.27	2.27	8.24	8.24	5.243	tr|G3HP08|G3HP08_CRIGR	AP-1 complex subunit beta-1 OS=Cricetulus griseus GN=I79_012511 PE=4 SV=1	CRIGR	1
	1493	1232	2.25	2.25	21.47	4.175	2.386	tr|G3I7Q5|G3I7Q5_CRIGR	Zinc finger protein ZPR1 OS=Cricetulus griseus GN=I79_019552 PE=4 SV=1	CRIGR	1
	1494	1235	2.24	2.24	7.576	5.844	2.381	tr|G3HMV7|G3HMV7_CRIGR	Tissue alpha-L-fucosidase OS=Cricetulus griseus GN=I79_012074 PE=4 SV=1	CRIGR	1
	1495	1238	2.21	2.21	26.76	10.99	5.634	tr|G3I412|G3I412_CRIGR	45 kDa calcium-binding protein OS=Cricetulus griseus GN=I79_018191 PE=4 SV=1	CRIGR	1
	1496	1239	2.2	2.2	41.6	24.8	12	tr|G3H2U4|G3H2U4_CRIGR	BolA-like protein 1 OS=Cricetulus griseus GN=I79_004546 PE=3 SV=1	CRIGR	1
	1497	1240	2.19	2.19	24.1	9.398	3.614	tr|G3HQ51|G3HQ51_CRIGR	[Pyruvate dehydrogenase [lipoamide]] kinase isozyme 3, mitochondrial OS=Cricetulus griseus GN=I79_012945 PE=4 SV=1	Pyruvate dehydrogenase [lipoamide	1
	1498	1242	2.19	2.19	41.56	21.43	11.69	tr|G3HV50|G3HV50_CRIGR	Prefoldin subunit 5 OS=Cricetulus griseus GN=I79_014827 PE=3 SV=1	CRIGR	1
	1499	1245	2.17	2.17	20.75	6.719	2.767	tr|G3IN86|G3IN86_CRIGR	Dipeptidyl-peptidase 2 OS=Cricetulus griseus GN=I79_025398 PE=4 SV=1	CRIGR	1
	1500	1247	2.17	2.17	27.5	27.5	11.87	tr|G3HUK9|G3HUK9_CRIGR	Peptidyl-prolyl cis-trans isomerase (Fragment) OS=Cricetulus griseus GN=I79_014621 PE=3 SV=1	CRIGR	1
	1501	1249	2.16	2.16	27.62	16.19	10.48	tr|G3H894|G3H894_CRIGR	Abhydrolase domain-containing protein 14B OS=Cricetulus griseus GN=I79_006594 PE=4 SV=1	CRIGR	1
	1502	1251	2.16	2.16	13.8	13.8	8.282	tr|G3HW62|G3HW62_CRIGR	Elongation factor Ts OS=Cricetulus griseus GN=I79_015210 PE=3 SV=1	CRIGR	1
	1503	1252	2.16	2.16	13.82	8.401	5.691	tr|G3HJV5|G3HJV5_CRIGR	Nuclear pore complex protein Nup155 OS=Cricetulus griseus GN=I79_010957 PE=4 SV=1	CRIGR	1
	1504	1253	2.16	2.16	22.45	9.864	5.782	tr|G3H0A7|G3H0A7_CRIGR	Eukaryotic translation initiation factor 3 subunit H (Fragment) OS=Cricetulus griseus GN=I79_003561 PE=3 SV=1	CRIGR	1
	1505	1254	2.16	2.16	14.91	11.4	8.333	tr|G3H4X1|G3H4X1_CRIGR	Ribulose-phosphate 3-epimerase OS=Cricetulus griseus GN=I79_005334 PE=3 SV=1	CRIGR	1
	1506	1255	2.16	2.16	1.829	1.829	0.9582	tr|G3HLU9|G3HLU9_CRIGR	Junction plakoglobin OS=Cricetulus griseus GN=I79_011694 PE=4 SV=1	CRIGR	1
	1507	1256	2.15	2.66	15.4	15.4	4.502	tr|G3HK86|G3HK86_CRIGR	Putative uncharacterized protein OS=Cricetulus griseus GN=I79_011104 PE=3 SV=1	CRIGR	1
	1508	1257	2.15	2.15	9.715	0.8035	0.4018	tr|G3GU75|G3GU75_CRIGR	Translational activator GCN1 OS=Cricetulus griseus GN=I79_001227 PE=4 SV=1	CRIGR	1
	1509	1258	2.15	2.15	15.79	15.79	9.774	tr|G3HZV0|G3HZV0_CRIGR	Ribosomal protein OS=Cricetulus griseus GN=I79_016614 PE=3 SV=1	CRIGR	1
	1510	1259	2.14	2.14	13.46	1.587	0.6211	tr|G3HDV7|G3HDV7_CRIGR	Leucine-rich repeat-containing protein 16A OS=Cricetulus griseus GN=I79_008723 PE=4 SV=1	CRIGR	1
	1511	1261	2.14	2.14	13.38	13.38	7.006	tr|G3H9Y7|G3H9Y7_CRIGR	NudC domain-containing protein 2 OS=Cricetulus griseus GN=I79_007220 PE=4 SV=1	CRIGR	1
	1512	1263	2.13	2.13	25	14.77	13.64	tr|G3IFH7|G3IFH7_CRIGR	NHP2-like protein 1 OS=Cricetulus griseus GN=I79_022499 PE=4 SV=1	CRIGR	1
	1513	1264	2.12	2.59	12.87	12.54	4.95	tr|G3HFZ9|G3HFZ9_CRIGR	Crk-like protein OS=Cricetulus griseus GN=I79_009517 PE=4 SV=1	CRIGR	1
	1514	1265	2.12	2.12	12.85	1.669	1.669	tr|G3I6B2|G3I6B2_CRIGR	Methylmalonyl-CoA mutase, mitochondrial OS=Cricetulus griseus GN=I79_019024 PE=4 SV=1	CRIGR	1
	1515	1266	2.12	2.12	31.94	29.17	19.44	tr|G3I7T9|G3I7T9_CRIGR	Guanine nucleotide-binding protein subunit gamma OS=Cricetulus griseus GN=I79_019587 PE=3 SV=1	CRIGR	1
	1516	1270	2.1	2.1	28.32	8.673	4.337	tr|G3I249|G3I249_CRIGR	Selenocysteine lyase OS=Cricetulus griseus GN=I79_017470 PE=4 SV=1	CRIGR	1
	1517	1271	2.1	2.1	29.15	7.38	4.059	tr|G3GWC4|G3GWC4_CRIGR	GrpE protein homolog OS=Cricetulus griseus GN=I79_002045 PE=3 SV=1	CRIGR	1
	1518	1272	2.1	2.1	20.92	10.71	7.143	tr|G3I933|G3I933_CRIGR	Xaa-Pro dipeptidase OS=Cricetulus griseus GN=I79_020067 PE=4 SV=1	CRIGR	1
	1519	1274	2.09	2.09	8.205	2.027	2.027	tr|G3II25|G3II25_CRIGR	Epithelial chloride channel protein OS=Cricetulus griseus GN=I79_023486 PE=3 SV=1	CRIGR	1
	1520	1275	2.09	2.09	11.7	2.059	2.059	tr|G3HS70|G3HS70_CRIGR	Coronin OS=Cricetulus griseus GN=I79_013696 PE=3 SV=1	CRIGR	1
	1521	1276	2.09	2.09	11.02	5.249	2.887	tr|G3HCG2|G3HCG2_CRIGR	Protein KIAA1881 OS=Cricetulus griseus GN=I79_008172 PE=4 SV=1	CRIGR	1
	1522	1277	2.08	2.09	8.062	3.411	1.705	tr|G3GVX8|G3GVX8_CRIGR	FAS-associated factor 1 OS=Cricetulus griseus GN=I79_001884 PE=4 SV=1	CRIGR	1
	1523	1278	2.08	2.08	9.091	1.713	1.713	tr|G3IEH3|G3IEH3_CRIGR	Elongation factor Tu GTP-binding domain-containing protein 1 OS=Cricetulus griseus GN=I79_022120 PE=4 SV=1	CRIGR	1
	1524	1279	2.08	2.08	25	18.24	10.81	tr|G3GVM9|G3GVM9_CRIGR	Calcium-regulated heat stable protein 1 OS=Cricetulus griseus GN=I79_001773 PE=4 SV=1	CRIGR	1
	1525	1281	2.07	2.58	24.34	19.58	5.82	tr|G3I3F4|G3I3F4_CRIGR	GTPase HRas OS=Cricetulus griseus GN=I79_017960 PE=4 SV=1	CRIGR	1
	1526	1281	0.01	2.52	34.84	14.19	7.097	tr|G3H3C9|G3H3C9_CRIGR	GTPase KRas OS=Cricetulus griseus GN=I79_004744 PE=4 SV=1	CRIGR	1
	1527	1282	2.07	2.11	11.89	3.303	1.585	tr|G3IHK4|G3IHK4_CRIGR	Elongation factor 2 kinase OS=Cricetulus griseus GN=I79_023295 PE=4 SV=1	CRIGR	1
	1528	1283	2.07	2.07	9.352	1.382	1.382	tr|G3H748|G3H748_CRIGR	Endoplasmic reticulum aminopeptidase 1 OS=Cricetulus griseus GN=I79_006174 PE=4 SV=1	CRIGR	1
	1529	1286	2.07	2.07	14.4	12.45	7.004	tr|G3HFQ7|G3HFQ7_CRIGR	Translation initiation factor eIF-2B subunit beta (Fragment) OS=Cricetulus griseus GN=I79_009421 PE=3 SV=1	CRIGR	1
	1530	1288	2.06	2.06	21.71	12.23	7.645	tr|G3HJT5|G3HJT5_CRIGR	Quinone oxidoreductase OS=Cricetulus griseus GN=I79_010937 PE=4 SV=1	CRIGR	1
	1531	1289	2.06	2.06	13.58	8.609	4.967	tr|G3ICH9|G3ICH9_CRIGR	Ataxin-10 OS=Cricetulus griseus GN=I79_021377 PE=4 SV=1	CRIGR	1
	1532	1290	2.06	2.06	18.35	6.422	6.422	tr|G3HF59|G3HF59_CRIGR	DNA-directed RNA polymerases I, II, and III subunit RPABC1 OS=Cricetulus griseus GN=I79_009214 PE=3 SV=1	CRIGR	1
	1533	1291	2.06	2.06	7.292	4.792	2.5	tr|G3HL33|G3HL33_CRIGR	Zyxin OS=Cricetulus griseus GN=I79_011418 PE=4 SV=1	CRIGR	1
	1534	1292	2.06	2.06	12.75	12.75	7.383	tr|G3IK70|G3IK70_CRIGR	PDZ and LIM domain protein 5 OS=Cricetulus griseus GN=I79_024263 PE=4 SV=1	CRIGR	1
	1535	1294	2.05	2.05	21.45	7.242	7.242	tr|G3ILG2|G3ILG2_CRIGR	THUMP domain-containing protein 1 OS=Cricetulus griseus GN=I79_024727 PE=4 SV=1	CRIGR	1
	1536	1295	2.05	2.05	17.34	5.276	5.276	tr|G3I970|G3I970_CRIGR	Porphobilinogen deaminase OS=Cricetulus griseus GN=I79_020104 PE=3 SV=1	CRIGR	1
	1537	1296	2.05	2.05	23.44	10.05	10.05	tr|G3IHZ2|G3IHZ2_CRIGR	COP9 signalosome complex subunit 8 OS=Cricetulus griseus GN=I79_023452 PE=4 SV=1	CRIGR	1
	1538	1298	2.05	2.05	12.5	6.579	6.579	tr|G3I2L7|G3I2L7_CRIGR	Coiled-coil-helix-coiled-coil-helix domain-containing protein 2, mitochondrial OS=Cricetulus griseus GN=I79_017655 PE=4 SV=1	CRIGR	1
	1539	1299	2.05	2.05	40.43	40.43	20.21	tr|G3HZE8|G3HZE8_CRIGR	U6 snRNA-associated Sm-like protein LSm2 (Fragment) OS=Cricetulus griseus GN=I79_016449 PE=4 SV=1	CRIGR	1
	1540	1302	2.04	2.04	6.599	1.742	1.742	tr|G3H316|G3H316_CRIGR	AP-3 complex subunit beta-1 OS=Cricetulus griseus GN=I79_004622 PE=4 SV=1	CRIGR	1
	1541	1303	2.04	2.04	9.934	3.311	3.311	tr|G3HXR8|G3HXR8_CRIGR	Phosphatidylinositol-binding clathrin assembly protein OS=Cricetulus griseus GN=I79_015831 PE=4 SV=1	CRIGR	1
	1542	1304	2.04	2.04	6.951	3.139	3.139	tr|G3GSL6|G3GSL6_CRIGR	UBX domain-containing protein 7 OS=Cricetulus griseus GN=I79_000633 PE=4 SV=1	CRIGR	1
	1543	1305	2.04	2.04	8.232	4.573	4.573	tr|G3HXM0|G3HXM0_CRIGR	NFU1 iron-sulfur cluster scaffold-like, mitochondrial OS=Cricetulus griseus GN=I79_015748 PE=4 SV=1	CRIGR	1
	1544	1309	2.03	2.03	6.457	0.5246	0.5246	tr|G3I962|G3I962_CRIGR	NLR family member X1 OS=Cricetulus griseus GN=I79_020097 PE=3 SV=1	CRIGR	1
	1545	1310	2.03	2.03	39.8	7.463	7.463	tr|G3HT11|G3HT11_CRIGR	Cysteine and glycine-rich protein 2 OS=Cricetulus griseus GN=I79_014012 PE=4 SV=1	CRIGR	1
	1546	1312	2.03	2.03	10.74	2.187	2.187	tr|G3HUN3|G3HUN3_CRIGR	60 kDa SS-A/Ro ribonucleoprotein OS=Cricetulus griseus GN=I79_014646 PE=4 SV=1	CRIGR	1
	1547	1314	2.03	2.03	23.33	8.333	8.333	tr|G3H9W6|G3H9W6_CRIGR	Trafficking protein particle complex subunit 3 OS=Cricetulus griseus GN=I79_007197 PE=4 SV=1	CRIGR	1
	1548	1315	2.03	2.03	24.26	11.03	11.03	tr|G3HIL0|G3HIL0_CRIGR	Triosephosphate isomerase OS=Cricetulus griseus GN=I79_010482 PE=3 SV=1	CRIGR	1
	1549	1317	2.03	2.03	22.89	13.25	13.25	tr|G3HDS0|G3HDS0_CRIGR	Mitochondrial import inner membrane translocase subunit Tim8 B OS=Cricetulus griseus GN=I79_008679 PE=4 SV=1	CRIGR	1
	1550	1317	0	2.03	22.89	13.25	13.25	tr|G3H2H8|G3H2H8_CRIGR	Mitochondrial import inner membrane translocase subunit Tim8 B OS=Cricetulus griseus GN=I79_004391 PE=4 SV=1	CRIGR	1
	1551	1318	2.03	2.03	10.19	5.556	5.556	tr|G3H065|G3H065_CRIGR	N-acetyltransferase NAT13 OS=Cricetulus griseus GN=I79_003540 PE=4 SV=1	CRIGR	1
	1552	1322	2.02	2.1	13.74	2.901	1.832	tr|G3IKI7|G3IKI7_CRIGR	Keratin, type II cytoskeletal 2 oral OS=Cricetulus griseus GN=I79_024390 PE=4 SV=1	CRIGR	1
	1553	1322	0.13	0.55	15.31	6.265	2.784	tr|G3IIF5|G3IIF5_CRIGR	Keratin, type II cytoskeletal 5 OS=Cricetulus griseus GN=I79_023623 PE=3 SV=1	CRIGR	1
	1554	1322	0	2.09	11.81	3.161	1.997	tr|G3IBN9|G3IBN9_CRIGR	Keratin, type II cytoskeletal 71 OS=Cricetulus griseus GN=I79_021070 PE=3 SV=1	CRIGR	1
	1555	1322	0	2.08	8.663	3.578	2.26	tr|G3IKD4|G3IKD4_CRIGR	Keratin, type II cytoskeletal 79 OS=Cricetulus griseus GN=I79_024334 PE=3 SV=1	CRIGR	1
	1556	1322	0	2.01	17.94	2.626	2.626	tr|G3IBN8|G3IBN8_CRIGR	Keratin, type II cytoskeletal 6A OS=Cricetulus griseus GN=I79_021069 PE=3 SV=1	CRIGR	1
	1557	1324	2.02	2.02	5.669	1.155	0.6824	tr|G3HGT4|G3HGT4_CRIGR	Uncharacterized protein KIAA0564-like OS=Cricetulus griseus GN=I79_009825 PE=4 SV=1	CRIGR	1
	1558	1325	2.02	2.02	17.52	4.14	4.14	tr|G3H088|G3H088_CRIGR	Autophagy-related protein 3 OS=Cricetulus griseus GN=I79_003524 PE=3 SV=1	CRIGR	1
	1559	1327	2.02	2.02	12.31	2.052	2.052	tr|G3H951|G3H951_CRIGR	Importin subunit alpha OS=Cricetulus griseus GN=I79_006913 PE=3 SV=1	CRIGR	1
	1560	1327	0	2	3.532	2.045	2.045	tr|G3IK55|G3IK55_CRIGR	Importin subunit alpha OS=Cricetulus griseus GN=I79_024248 PE=3 SV=1	CRIGR	1
	1561	1328	2.02	2.02	7.256	1.472	1.472	tr|G3H8H3|G3H8H3_CRIGR	Nck-associated protein 1 (Fragment) OS=Cricetulus griseus GN=I79_006673 PE=4 SV=1	CRIGR	1
	1562	1329	2.02	2.02	23.75	6.02	6.02	tr|G3H7Y1|G3H7Y1_CRIGR	Peroxisomal biogenesis factor 19 OS=Cricetulus griseus GN=I79_006477 PE=4 SV=1	CRIGR	1
	1563	1329	0	2.02	23.75	6.02	6.02	sp|Q60415|PEX19_CRIGR	Peroxisomal biogenesis factor 19 OS=Cricetulus griseus GN=PEX19 PE=1 SV=1	CRIGR	1
	1564	1330	2.02	2.02	8.442	2.381	2.381	tr|G3HJ00|G3HJ00_CRIGR	Mothers against decapentaplegic-like 5 OS=Cricetulus griseus GN=I79_010633 PE=4 SV=1	CRIGR	1
	1565	1330	0	2	10.54	2.366	2.366	tr|G3HGB4|G3HGB4_CRIGR	Mothers against decapentaplegic-like 9 OS=Cricetulus griseus GN=I79_009638 PE=4 SV=1	CRIGR	1
	1566	1330	0	2	6.061	3.03	3.03	tr|G3H8N9|G3H8N9_CRIGR	Mothers against decapentaplegic-like 3 OS=Cricetulus griseus GN=I79_006747 PE=4 SV=1	CRIGR	1
	1567	1330	0	2	2.355	2.355	2.355	tr|G3HAD0|G3HAD0_CRIGR	Mothers against decapentaplegic-like 2 OS=Cricetulus griseus GN=I79_007378 PE=4 SV=1	CRIGR	1
	1568	1330	0	2	4.741	4.741	4.741	tr|G3H9G8|G3H9G8_CRIGR	Mothers against decapentaplegic-like 1 OS=Cricetulus griseus GN=I79_007040 PE=4 SV=1	CRIGR	1
	1569	1331	2.02	2.02	12.65	4.743	4.743	tr|G3HWJ6|G3HWJ6_CRIGR	Poly(U)-binding-splicing factor PUF60 OS=Cricetulus griseus GN=I79_015379 PE=4 SV=1	CRIGR	1
	1570	1333	2.02	2.02	10.19	5.785	5.785	tr|G3HLR7|G3HLR7_CRIGR	Adenosine deaminase OS=Cricetulus griseus GN=I79_011661 PE=4 SV=1	CRIGR	1
	1571	1334	2.02	2.02	7.943	4.277	4.277	tr|G3HHL3|G3HHL3_CRIGR	Eukaryotic translation initiation factor 5B OS=Cricetulus griseus GN=I79_010118 PE=4 SV=1	CRIGR	1
	1572	1335	2.02	2.02	9.28	2.841	2.841	tr|G3H6K5|G3H6K5_CRIGR	HIV Tat-specific factor 1-like OS=Cricetulus griseus GN=I79_005970 PE=4 SV=1	CRIGR	1
	1573	1336	2.02	2.02	26.32	18.42	18.42	tr|G3IC05|G3IC05_CRIGR	Density-regulated protein OS=Cricetulus griseus GN=I79_021192 PE=4 SV=1	CRIGR	1
	1574	1343	2.01	2.01	9.313	1.996	1.996	tr|G3HLY0|G3HLY0_CRIGR	Tubulin gamma chain OS=Cricetulus griseus GN=I79_011724 PE=3 SV=1	CRIGR	1
	1575	1346	2.01	2.01	24.21	6.842	6.842	tr|G3HNJ1|G3HNJ1_CRIGR	Coiled-coil domain-containing protein 25 OS=Cricetulus griseus GN=I79_012329 PE=4 SV=1	CRIGR	1
	1576	1347	2.01	2.01	8.095	2.619	2.619	tr|G3GX32|G3GX32_CRIGR	Cysteine-rich with EGF-like domain protein 1 OS=Cricetulus griseus GN=I79_002344 PE=4 SV=1	CRIGR	1
	1577	1349	2.01	2.01	19.44	9.028	9.028	tr|G3HQH4|G3HQH4_CRIGR	Pre-mRNA-splicing factor SPF27 OS=Cricetulus griseus GN=I79_013075 PE=4 SV=1	CRIGR	1
	1578	1351	2.01	2.01	19.72	18.31	18.31	tr|G3IQ49|G3IQ49_CRIGR	SWI/SNF-related matrix-associated actin-dependent regulator chromatin subfamily E member 1 OS=Cricetulus griseus GN=I79_026139 PE=4 SV=1	CRIGR	1
	1579	1352	2.01	2.01	34.15	21.95	21.95	tr|G3IAF9|G3IAF9_CRIGR	Short coiled-coil protein OS=Cricetulus griseus GN=I79_020580 PE=4 SV=1	CRIGR	1
	1580	1353	2.01	2.01	13.73	9.15	9.15	tr|G3HHS0|G3HHS0_CRIGR	Zinc finger CCCH domain-containing protein 15 OS=Cricetulus griseus GN=I79_010179 PE=4 SV=1	CRIGR	1
	1581	1353	0	2	7.143	2.778	2.778	tr|G3HW96|G3HW96_CRIGR	G-protein coupled receptor 143 OS=Cricetulus griseus GN=I79_015248 PE=4 SV=1	CRIGR	1
	1582	1354	2.01	2.01	3.628	2.681	2.681	tr|G3H4J6|G3H4J6_CRIGR	Sec1 family domain-containing protein 1 OS=Cricetulus griseus GN=I79_005199 PE=4 SV=1	CRIGR	1
	1583	1355	2.01	2.01	13.54	6.771	6.771	tr|A1E3K3|A1E3K3_CRIGR	Bax OS=Cricetulus griseus PE=2 SV=1	CRIGR	1
	1584	1373	2	2.53	30.21	22.92	14.58	sp|Q9QXP3-2|HMGA1_CRIGR	Isoform HMG-Y of High mobility group protein HMG-I/HMG-Y OS=Cricetulus griseus GN=HMGA1	CRIGR	1
	1585	1376	2	2.02	27.07	9.023	9.023	tr|G3H843|G3H843_CRIGR	TSC22 domain family protein 1 OS=Cricetulus griseus GN=I79_006541 PE=4 SV=1	CRIGR	1
	1586	1377	2	2.01	17.39	3.557	3.557	tr|G3I2P8|G3I2P8_CRIGR	Annexin OS=Cricetulus griseus GN=I79_017691 PE=3 SV=1	CRIGR	1
	1587	1379	2	2.01	13.13	5.556	5.556	tr|G3HDV8|G3HDV8_CRIGR	60S ribosomal protein L4 OS=Cricetulus griseus GN=I79_008724 PE=4 SV=1	CRIGR	1
	1588	1381	2	2	14.07	3.463	3.463	tr|G3HGL3|G3HGL3_CRIGR	Peroxisomal NADH pyrophosphatase NUDT12 OS=Cricetulus griseus GN=I79_009751 PE=4 SV=1	CRIGR	1
	1589	1382	2	2	16.94	5.278	5.278	tr|G3I8T3|G3I8T3_CRIGR	Wiskott-Aldrich syndrome protein family member 2 OS=Cricetulus griseus GN=I79_019962 PE=4 SV=1	CRIGR	1
	1590	1383	2	2	18.62	3.827	3.827	tr|G3GVQ8|G3GVQ8_CRIGR	Selenide, water dikinase 1 OS=Cricetulus griseus GN=I79_001805 PE=4 SV=1	CRIGR	1
	1591	1384	2	2	46.77	12.1	12.1	tr|G3IHB0|G3IHB0_CRIGR	14 kDa phosphohistidine phosphatase OS=Cricetulus griseus GN=I79_023198 PE=4 SV=1	CRIGR	1
	1592	1385	2	2	21.53	5.109	5.109	tr|G3I557|G3I557_CRIGR	Toll-interacting protein OS=Cricetulus griseus GN=I79_018601 PE=4 SV=1	CRIGR	1
	1593	1387	2	2	9.236	2.131	2.131	tr|G3HLX5|G3HLX5_CRIGR	Bifunctional coenzyme A synthase OS=Cricetulus griseus GN=I79_011719 PE=3 SV=1	CRIGR	1
	1594	1388	2	2	33.54	9.756	9.756	tr|G3HEF9|G3HEF9_CRIGR	CB1 cannabinoid receptor-interacting protein 1 OS=Cricetulus griseus GN=I79_008943 PE=4 SV=1	CRIGR	1
	1595	1391	2	2	10.65	2.804	2.804	tr|G3GXU2|G3GXU2_CRIGR	Nuclear receptor-binding protein OS=Cricetulus griseus GN=I79_002585 PE=4 SV=1	CRIGR	1
	1596	1392	2	2	11.78	3.111	3.111	tr|G3GVH8|G3GVH8_CRIGR	Protein flightless-1-like OS=Cricetulus griseus GN=I79_001717 PE=4 SV=1	CRIGR	1
	1597	1393	2	2	22.48	5.505	5.505	tr|G3IC31|G3IC31_CRIGR	26S proteasome non-ATPase regulatory subunit 10 OS=Cricetulus griseus GN=I79_021219 PE=4 SV=1	CRIGR	1
	1598	1395	2	2	39.47	14.47	14.47	tr|G3HKZ3|G3HKZ3_CRIGR	Zinc finger protein 706 OS=Cricetulus griseus GN=I79_011376 PE=4 SV=1	CRIGR	1
	1599	1398	2	2	25.34	6.335	6.335	tr|G3HBP4|G3HBP4_CRIGR	Fumarylacetoacetate hydrolase domain-containing protein 1 OS=Cricetulus griseus GN=I79_007948 PE=4 SV=1	CRIGR	1
	1600	1399	2	2	8.556	3.209	3.209	tr|G3GZB1|G3GZB1_CRIGR	Eukaryotic translation initiation factor 3 subunit M OS=Cricetulus griseus GN=Eif3m PE=3 SV=1	CRIGR	1
	1601	1400	2	2	32.29	13.54	13.54	tr|G3GVU5|G3GVU5_CRIGR	Medium-chain specific acyl-CoA dehydrogenase, mitochondrial OS=Cricetulus griseus GN=I79_001847 PE=4 SV=1	CRIGR	1
	1602	1402	2	2	17.16	5.597	5.597	tr|G3IEE4|G3IEE4_CRIGR	Protein kinase C delta-binding protein OS=Cricetulus griseus GN=I79_022091 PE=4 SV=1	CRIGR	1
	1603	1405	2	2	19.57	13.04	13.04	tr|G3HYW2|G3HYW2_CRIGR	Malignant T cell amplified sequence 1 OS=Cricetulus griseus GN=I79_016254 PE=4 SV=1	CRIGR	1
	1604	1407	2	2	9.934	7.947	7.947	tr|G3HNB8|G3HNB8_CRIGR	Proteolipid protein 2 OS=Cricetulus griseus GN=I79_012255 PE=4 SV=1	CRIGR	1
	1605	1408	2	2	40.66	14.29	14.29	tr|G3HN76|G3HN76_CRIGR	Polyadenylate-binding protein 4 OS=Cricetulus griseus GN=I79_012210 PE=4 SV=1	CRIGR	1
	1606	1409	2	2	4.788	3.131	3.131	tr|G3HEI6|G3HEI6_CRIGR	Lysyl oxidase-like 1 OS=Cricetulus griseus GN=I79_008970 PE=4 SV=1	CRIGR	1
	1607	1410	2	2	17.56	12.98	12.98	tr|G3HAU8|G3HAU8_CRIGR	Transcription and mRNA export factor ENY2 OS=Cricetulus griseus GN=Eny2 PE=3 SV=1	CRIGR	1
	1608	1411	2	2	14.74	7.895	7.895	tr|G3H8Z0|G3H8Z0_CRIGR	GDP-fucose protein O-fucosyltransferase 2 OS=Cricetulus griseus GN=I79_006839 PE=4 SV=1	CRIGR	1
	1609	1413	2	2	4.05	2.025	2.025	tr|G3GU78|G3GU78_CRIGR	Paxillin OS=Cricetulus griseus GN=I79_001232 PE=3 SV=1	CRIGR	1
	1610	1415	2	2	4.715	2.554	2.554	sp|P14672|GTR4_HUMAN	Solute carrier family 2, facilitated glucose transporter member 4 OS=Homo sapiens GN=SLC2A4 PE=1 SV=1	HUMAN	1
	1611	1416	2	2	21.52	21.52	21.52	tr|G3IPZ1|G3IPZ1_CRIGR	ATP-dependent RNA helicase DHX8 OS=Cricetulus griseus GN=I79_026076 PE=4 SV=1	CRIGR	1
	1612	1419	2	2	14.29	14.29	14.29	tr|G3ICI2|G3ICI2_CRIGR	40S ribosomal protein S29 OS=Cricetulus griseus GN=I79_021380 PE=4 SV=1	CRIGR	1
	1613	1419	0	2	14.29	14.29	14.29	tr|G3IBI6|G3IBI6_CRIGR	40S ribosomal protein S29 OS=Cricetulus griseus GN=I79_021006 PE=4 SV=1	CRIGR	1
	1614	1419	0	2	14.29	14.29	14.29	tr|G3HJU9|G3HJU9_CRIGR	40S ribosomal protein S29 OS=Cricetulus griseus GN=I79_010951 PE=4 SV=1	CRIGR	1
	1615	1420	2	2	11.11	11.11	11.11	tr|G3IB53|G3IB53_CRIGR	Golgi-associated plant pathogenesis-related protein 1 OS=Cricetulus griseus GN=I79_020842 PE=4 SV=1	CRIGR	1
	1616	1421	2	2	14.04	14.04	14.04	tr|G3IA30|G3IA30_CRIGR	60S acidic ribosomal protein P1 OS=Cricetulus griseus GN=I79_020446 PE=3 SV=1	CRIGR	1
	1617	1421	0	2	15.69	15.69	15.69	tr|G3HSN7|G3HSN7_CRIGR	60S acidic ribosomal protein P1 OS=Cricetulus griseus GN=I79_013871 PE=3 SV=1	CRIGR	1
	1618	1421	0	2	19.51	19.51	19.51	tr|G3HF33|G3HF33_CRIGR	60S acidic ribosomal protein P1 OS=Cricetulus griseus GN=I79_009186 PE=4 SV=1	CRIGR	1
	1619	1422	2	2	8.462	8.462	8.462	tr|G3I784|G3I784_CRIGR	Enolase-phosphatase E1 OS=Cricetulus griseus GN=I79_019369 PE=3 SV=1	CRIGR	1
	1620	1424	2	2	5.956	5.956	5.956	tr|G3I341|G3I341_CRIGR	Myeloid-associated differentiation marker OS=Cricetulus griseus GN=I79_017842 PE=4 SV=1	CRIGR	1
	1621	1429	2	2	30.65	30.65	30.65	tr|G3HX33|G3HX33_CRIGR	60S ribosomal protein L7 OS=Cricetulus griseus GN=I79_015549 PE=4 SV=1	CRIGR	1
	1622	1430	2	2	4.31	4.31	4.31	tr|G3HRL6|G3HRL6_CRIGR	CD63 antigen OS=Cricetulus griseus GN=I79_013522 PE=4 SV=1	CRIGR	1
	1623	1431	2	2	7.216	7.216	7.216	tr|G3HQ86|G3HQ86_CRIGR	BH3-interacting domain death agonist OS=Cricetulus griseus GN=I79_012981 PE=4 SV=1	CRIGR	1
	1624	1434	2	2	28.57	28.57	28.57	tr|G3HLJ0|G3HLJ0_CRIGR	Protein LSM12-like OS=Cricetulus griseus GN=I79_011580 PE=4 SV=1	CRIGR	1
	1625	1435	2	2	6.726	6.726	6.726	tr|G3HIQ9|G3HIQ9_CRIGR	Golgi phosphoprotein 3 (Fragment) OS=Cricetulus griseus GN=I79_010535 PE=4 SV=1	CRIGR	1
	1626	1436	2	2	7.386	7.386	7.386	tr|G3HED6|G3HED6_CRIGR	Protein Dr1 OS=Cricetulus griseus GN=I79_008920 PE=4 SV=1	CRIGR	1
	1627	1437	2	2	10.2	10.2	10.2	tr|G3HDA0|G3HDA0_CRIGR	Eukaryotic translation elongation factor 1 epsilon-1 OS=Cricetulus griseus GN=I79_008479 PE=4 SV=1	CRIGR	1
	1628	1437	0	2	5.747	5.747	5.747	sp|P70102|MCA3_CRIGR	Eukaryotic translation elongation factor 1 epsilon-1 OS=Cricetulus griseus GN=EEF1E1 PE=2 SV=1	CRIGR	1
	1629	1438	2	2	8.939	8.939	8.939	tr|G3HB55|G3HB55_CRIGR	GTP-binding protein Rheb OS=Cricetulus griseus GN=I79_007675 PE=4 SV=1	CRIGR	1
	1630	1439	2	2	13.75	13.75	13.75	tr|G3H9H3|G3H9H3_CRIGR	U6 snRNA-associated Sm-like protein LSm6 OS=Cricetulus griseus GN=I79_007045 PE=4 SV=1	CRIGR	1
	1631	1440	2	2	6.512	6.512	6.512	tr|G3H2V3|G3H2V3_CRIGR	Acidic leucine-rich nuclear phosphoprotein 32 family member E OS=Cricetulus griseus GN=I79_004556 PE=4 SV=1	CRIGR	1
	1632	1441	2	2	2.308	2.308	2.308	tr|G3H2P3|G3H2P3_CRIGR	Beta-galactosidase (Fragment) OS=Cricetulus griseus GN=I79_004461 PE=3 SV=1	CRIGR	1
	1633	1442	2	2	21.49	21.49	21.49	tr|G3H0T9|G3H0T9_CRIGR	Huntingtin-interacting protein K OS=Cricetulus griseus GN=I79_003758 PE=4 SV=1	CRIGR	1
	1634	1443	2	2	5.178	5.178	5.178	tr|G3GYX2|G3GYX2_CRIGR	Nucleolar protein 58 OS=Cricetulus griseus GN=I79_002999 PE=4 SV=1	CRIGR	1
	1635	1446	2	2	7.051	7.051	7.051	tr|G3GSK1|G3GSK1_CRIGR	Nuclear cap-binding protein subunit 2 OS=Cricetulus griseus GN=I79_000616 PE=4 SV=1	CRIGR	1
	1636	1447	1.96	2	8.284	5.917	5.917	tr|G3HU24|G3HU24_CRIGR	Aflatoxin B1 aldehyde reductase member 2 OS=Cricetulus griseus GN=I79_014427 PE=4 SV=1	CRIGR	1
	1637	1448	1.96	2	5.988	5.988	5.988	tr|G3H938|G3H938_CRIGR	Protein archease OS=Cricetulus griseus GN=I79_006899 PE=4 SV=1	CRIGR	1
	1638	1449	1.95	1.97	8.772	5.068	3.314	tr|G3I8W0|G3I8W0_CRIGR	WD40 repeat-containing protein SMU1 OS=Cricetulus griseus GN=I79_019992 PE=4 SV=1	CRIGR	1
	1639	1449	0	1.97	8.772	5.068	3.314	sp|Q76B40|SMU1_CRIGR	WD40 repeat-containing protein SMU1 OS=Cricetulus griseus GN=SMU1 PE=2 SV=1	CRIGR	1
	1640	1450	1.94	1.94	9.286	9.286	8.571	tr|G3I881|G3I881_CRIGR	Peptidyl-prolyl cis-trans isomerase OS=Cricetulus griseus GN=I79_019744 PE=4 SV=1	CRIGR	1
	1641	1454	1.89	1.89	12.74	4.155	4.155	tr|G3IER2|G3IER2_CRIGR	Cleavage and polyadenylation specificity factor subunit 7 OS=Cricetulus griseus GN=I79_022214 PE=4 SV=1	CRIGR	1
	1642	1455	1.89	1.89	15.04	15.04	15.04	tr|G3INR3|G3INR3_CRIGR	Hepatitis B virus X-interacting protein-like OS=Cricetulus griseus GN=I79_025595 PE=4 SV=1	CRIGR	1
	1643	1457	1.88	1.88	13.95	3.171	3.171	tr|G3HSY7|G3HSY7_CRIGR	V-type proton ATPase subunit H OS=Cricetulus griseus GN=I79_013987 PE=4 SV=1	CRIGR	1
	1644	1458	1.87	1.91	5.526	2.5	1.711	tr|G3GRH6|G3GRH6_CRIGR	RNA polymerase-associated protein LEO1 OS=Cricetulus griseus GN=I79_000125 PE=4 SV=1	CRIGR	1
	1645	1459	1.87	1.87	21.9	18.3	6.536	tr|G3HAV4|G3HAV4_CRIGR	Vacuolar protein sorting-associated protein VTA1-like OS=Cricetulus griseus GN=I79_007563 PE=4 SV=1	CRIGR	1
	1646	1461	1.86	1.86	2.853	1.952	1.952	tr|G3HND2|G3HND2_CRIGR	Histone deacetylase 6 OS=Cricetulus griseus GN=I79_012269 PE=4 SV=1	CRIGR	1
	1647	1462	1.85	1.85	16.06	11.68	5.474	tr|G3H204|G3H204_CRIGR	Syntaxin-12 OS=Cricetulus griseus GN=I79_004204 PE=3 SV=1	CRIGR	1
	1648	1464	1.83	1.83	37.33	28.67	7.333	tr|G3I303|G3I303_CRIGR	DNA-directed RNA polymerases I, II, and III subunit RPABC3 OS=Cricetulus griseus GN=I79_017801 PE=4 SV=1	CRIGR	1
	1649	1466	1.82	1.83	24.05	24.05	8.228	tr|G3IGZ8|G3IGZ8_CRIGR	Torsin-1B OS=Cricetulus griseus GN=I79_023076 PE=4 SV=1	CRIGR	1
	1650	1467	1.82	1.82	8.785	3.458	1.121	tr|G3I3B3|G3I3B3_CRIGR	Nuclear pore complex protein Nup98-Nup96 OS=Cricetulus griseus GN=I79_017917 PE=4 SV=1	CRIGR	1
	1651	1469	1.82	1.82	19.82	10.81	10.81	tr|G3H0T1|G3H0T1_CRIGR	Eukaryotic translation initiation factor 3 subunit J OS=Cricetulus griseus GN=I79_003749 PE=4 SV=1	CRIGR	1
	1652	1475	1.8	1.8	6.911	6.911	4.065	tr|G3HJN3|G3HJN3_CRIGR	Ubiquitin-conjugating enzyme E2 Z OS=Cricetulus griseus GN=I79_010881 PE=4 SV=1	CRIGR	1
	1653	1476	1.8	1.8	8.046	8.046	8.046	tr|G3I1G2|G3I1G2_CRIGR	60S ribosomal protein L18a OS=Cricetulus griseus GN=I79_017217 PE=4 SV=1	CRIGR	1
	1654	1479	1.77	1.77	18.25	5.754	1.984	tr|G3GSP9|G3GSP9_CRIGR	Protein disulfide-isomerase A5 OS=Cricetulus griseus GN=I79_000667 PE=4 SV=1	CRIGR	1
	1655	1480	1.77	1.77	17.86	3.929	3.929	tr|G3HT41|G3HT41_CRIGR	Abl interactor 1 OS=Cricetulus griseus GN=I79_014053 PE=4 SV=1	CRIGR	1
	1656	1481	1.77	1.77	6.562	4.375	4.375	tr|G3IDE4|G3IDE4_CRIGR	Tripeptidyl-peptidase 1 OS=Cricetulus griseus GN=I79_021722 PE=4 SV=1	CRIGR	1
	1657	1482	1.77	1.77	8.504	3.519	3.519	tr|G3H9Z3|G3H9Z3_CRIGR	Putative deoxyribose-phosphate aldolase OS=Cricetulus griseus GN=I79_007226 PE=4 SV=1	CRIGR	1
	1658	1482	0	1.77	7.317	7.317	7.317	tr|G3GV99|G3GV99_CRIGR	Putative deoxyribose-phosphate aldolase OS=Cricetulus griseus GN=I79_001633 PE=4 SV=1	CRIGR	1
	1659	1483	1.76	1.76	8.661	8.661	2.362	tr|G3HL93|G3HL93_CRIGR	Muscleblind-like protein 1 OS=Cricetulus griseus GN=I79_011479 PE=4 SV=1	CRIGR	1
	1660	1483	0	1.52	12.1	8.897	3.203	tr|G3GS74|G3GS74_CRIGR	Muscleblind-like protein 2 OS=Cricetulus griseus GN=I79_000387 PE=4 SV=1	CRIGR	1
	1661	1486	1.74	1.74	9.322	9.322	9.322	tr|G3HHY9|G3HHY9_CRIGR	V-type proton ATPase subunit G 1 OS=Cricetulus griseus GN=I79_010250 PE=4 SV=1	CRIGR	1
	1662	1489	1.71	1.71	5.763	1.011	1.011	tr|G3GSN1|G3GSN1_CRIGR	Oxysterol-binding protein OS=Cricetulus griseus GN=I79_000648 PE=3 SV=1	CRIGR	1
	1663	1491	1.69	1.69	8.005	2.088	1.044	tr|G3I7M1|G3I7M1_CRIGR	Ataxin-2-like protein OS=Cricetulus griseus GN=I79_019514 PE=4 SV=1	CRIGR	1
	1664	1493	1.68	1.68	16.45	5.436	1.574	tr|G3HXV5|G3HXV5_CRIGR	Nucleolar phosphoprotein p130 OS=Cricetulus griseus GN=I79_015870 PE=4 SV=1	CRIGR	1
	1665	1497	1.66	1.66	10.36	3.883	3.883	tr|G3I2X1|G3I2X1_CRIGR	UPF0468 protein C16orf80-like OS=Cricetulus griseus GN=I79_017766 PE=4 SV=1	CRIGR	1
	1666	1498	1.65	1.65	22.52	6.623	6.623	tr|G3H194|G3H194_CRIGR	Clathrin light chain B (Fragment) OS=Cricetulus griseus GN=I79_003918 PE=4 SV=1	CRIGR	1
	1667	1499	1.65	1.65	15.85	15.24	6.707	tr|G3IMV0|G3IMV0_CRIGR	Protein phosphatase methylesterase 1 OS=Cricetulus griseus GN=I79_025248 PE=4 SV=1	CRIGR	1
	1668	1501	1.63	1.63	16.83	16.83	8.911	tr|G3HC29|G3HC29_CRIGR	Protein S100-A4 OS=Cricetulus griseus GN=I79_008072 PE=4 SV=1	CRIGR	1
	1669	1505	1.62	1.62	14.67	4.348	4.348	tr|G3HY44|G3HY44_CRIGR	Serologically defined colon cancer antigen 8 OS=Cricetulus griseus GN=I79_015961 PE=4 SV=1	CRIGR	1
	1670	1506	1.61	1.61	12.73	6.061	3.03	tr|G3HHZ9|G3HHZ9_CRIGR	Delta-aminolevulinic acid dehydratase OS=Cricetulus griseus GN=I79_010261 PE=3 SV=1	CRIGR	1
	1671	1507	1.61	1.61	10.8	9.859	5.164	tr|G3I4I8|G3I4I8_CRIGR	CDP-diacylglycerol--inositol 3-phosphatidyltransferase OS=Cricetulus griseus GN=I79_018368 PE=3 SV=1	CRIGR	1
	1672	1510	1.59	1.59	9.326	2.726	1.578	tr|G3HSJ1|G3HSJ1_CRIGR	Nicalin OS=Cricetulus griseus GN=I79_013824 PE=4 SV=1	CRIGR	1
	1673	1511	1.57	1.57	17.13	6.21	3.212	tr|G3I5B0|G3I5B0_CRIGR	Carnitine O-palmitoyltransferase 1, liver isoform OS=Cricetulus griseus GN=I79_018654 PE=4 SV=1	CRIGR	1
	1674	1512	1.57	1.57	16.02	7.039	1.699	tr|G3IFK1|G3IFK1_CRIGR	Flap endonuclease 1 OS=Cricetulus griseus GN=I79_022524 PE=3 SV=1	CRIGR	1
	1675	1515	1.55	1.55	13.73	3.314	1.42	tr|G3I732|G3I732_CRIGR	DNA polymerase OS=Cricetulus griseus GN=I79_019313 PE=3 SV=1	CRIGR	1
	1676	1517	1.52	1.52	20.52	3.468	3.468	tr|G3HGM6|G3HGM6_CRIGR	N(4)-(Beta-N-acetylglucosaminyl)-L-asparaginase OS=Cricetulus griseus GN=I79_009764 PE=4 SV=1	CRIGR	1
	1677	1518	1.52	1.52	11.44	5.473	5.473	tr|G3IAK1|G3IAK1_CRIGR	Transgelin OS=Cricetulus griseus GN=I79_020624 PE=4 SV=1	CRIGR	1
	1678	1520	1.52	1.52	7.792	4.329	4.329	tr|G3GW05|G3GW05_CRIGR	Hcp beta-lactamase-like protein C1orf163-like OS=Cricetulus griseus GN=I79_001911 PE=4 SV=1	CRIGR	1
	1679	1522	1.5	1.52	9.938	0.8475	0.8475	tr|G3I9L4|G3I9L4_CRIGR	PERQ amino acid-rich with GYF domain-containing protein 2 OS=Cricetulus griseus GN=I79_020264 PE=4 SV=1	CRIGR	1
	1680	1523	1.49	1.49	9.002	2.19	1.095	tr|G3HAG8|G3HAG8_CRIGR	AP-1 complex subunit gamma-1 OS=Cricetulus griseus GN=I79_007420 PE=4 SV=1	CRIGR	1
	1681	1528	1.47	1.47	7.887	0.6816	0.6816	tr|G3I7E2|G3I7E2_CRIGR	Focal adhesion kinase 1 OS=Cricetulus griseus GN=I79_019430 PE=4 SV=1	CRIGR	1
	1682	1529	1.47	1.47	8.815	1.216	1.216	tr|G3HVC7|G3HVC7_CRIGR	Diphthamide biosynthesis protein 1 OS=Cricetulus griseus GN=I79_014912 PE=4 SV=1	CRIGR	1
	1683	1532	1.45	1.45	13.23	4.603	2.186	tr|G3HUC2|G3HUC2_CRIGR	A-kinase anchor protein 2 OS=Cricetulus griseus GN=I79_014530 PE=4 SV=1	CRIGR	1
	1684	1535	1.43	1.43	7.958	1.592	1.592	tr|G3HWE6|G3HWE6_CRIGR	Ubiquitin carboxyl-terminal hydrolase 47 OS=Cricetulus griseus GN=I79_015303 PE=4 SV=1	CRIGR	1
	1685	1536	1.43	1.43	14.01	7.246	4.348	tr|G3GRW2|G3GRW2_CRIGR	Neighbor of COX4 OS=Cricetulus griseus GN=I79_000257 PE=4 SV=1	CRIGR	1
	1686	1536	0	1.31	6.383	6.383	6.383	tr|G3INQ9|G3INQ9_CRIGR	Neighbor of COX4 OS=Cricetulus griseus GN=I79_025590 PE=4 SV=1	CRIGR	1
	1687	1539	1.39	1.39	13.87	3.782	3.782	tr|G3HU10|G3HU10_CRIGR	Prefoldin subunit 2 OS=Cricetulus griseus GN=I79_014378 PE=4 SV=1	CRIGR	1
	1688	1541	1.38	1.38	17.58	17.58	9.89	tr|G3I308|G3I308_CRIGR	26S proteasome non-ATPase regulatory subunit 2 OS=Cricetulus griseus GN=I79_017808 PE=4 SV=1	CRIGR	1
	1689	1543	1.36	1.36	12.2	0.7874	0.7874	RRRRRtr|G3HR50|G3HR50_CRIGR	REVERSED Uncharacterized protein C6orf132-like OS=Cricetulus griseus GN=I79_013311 PE=4 SV=1	CRIGR	1
	1690	1544	1.36	1.36	22.22	5.556	5.556	tr|Q9QVY2|Q9QVY2_CRIGR	SAR1B protein promoting vesicle budding from the endoplasmic reticulum OS=Cricetulus griseus PE=3 SV=1	CRIGR	1
	1691	1544	0	1.36	5.556	5.556	5.556	tr|G3H2D6|G3H2D6_CRIGR	GTP-binding protein SAR1b OS=Cricetulus griseus GN=I79_004346 PE=3 SV=1	CRIGR	1
	1692	1544	0	1.36	5.556	5.556	5.556	sp|Q9QVY3|SAR1B_CRIGR	GTP-binding protein SAR1b OS=Cricetulus griseus GN=SAR1B PE=1 SV=1	CRIGR	1
	1693	1545	1.35	1.38	15.87	0.9337	0.9337	tr|G3HUX3|G3HUX3_CRIGR	Rho-associated protein kinase 1 OS=Cricetulus griseus GN=I79_014743 PE=4 SV=1	CRIGR	1
	1694	1546	1.35	1.35	9.707	4.029	1.648	tr|G3IDM9|G3IDM9_CRIGR	Transcription factor p65 OS=Cricetulus griseus GN=I79_021812 PE=4 SV=1	CRIGR	1
	1695	1547	1.35	1.35	7.27	3.877	1.939	tr|G3H656|G3H656_CRIGR	Cytoplasmic dynein 1 light intermediate chain 2 OS=Cricetulus griseus GN=I79_005807 PE=4 SV=1	CRIGR	1
	1696	1549	1.33	1.33	17.09	10.83	4.843	tr|G3H203|G3H203_CRIGR	Nuclear inhibitor of protein phosphatase 1 OS=Cricetulus griseus GN=I79_004203 PE=4 SV=1	CRIGR	1
	1697	1551	1.33	1.33	4.933	4.933	4.933	tr|G3IFV9|G3IFV9_CRIGR	Methyltransferase-like protein 11A OS=Cricetulus griseus GN=I79_022633 PE=4 SV=1	CRIGR	1
	1698	1552	1.31	1.31	12.76	4.451	4.451	tr|G3HXU8|G3HXU8_CRIGR	Fibroblast growth factor OS=Cricetulus griseus GN=I79_015863 PE=3 SV=1	CRIGR	1
	1699	1553	1.31	1.31	6.538	3.269	3.269	tr|G3HFB4|G3HFB4_CRIGR	Splicing factor 3A subunit 2 OS=Cricetulus griseus GN=I79_009270 PE=4 SV=1	CRIGR	1
	1700	1554	1.3	1.43	21.29	11.31	4.213	tr|G3HQH1|G3HQH1_CRIGR	Cold shock domain-containing protein E1 (Fragment) OS=Cricetulus griseus GN=I79_013072 PE=4 SV=1	CRIGR	1
	1701	1555	1.3	1.3	30.56	5.093	5.093	tr|G3HWS3|G3HWS3_CRIGR	Ras-related protein Rab-2B OS=Cricetulus griseus GN=I79_015421 PE=3 SV=1	CRIGR	1
	1702	1558	1.29	1.3	7.385	2	2	tr|G3HW90|G3HW90_CRIGR	Mutated melanoma-associated antigen 1-like protein 1 OS=Cricetulus griseus GN=I79_015242 PE=4 SV=1	CRIGR	1
	1703	1559	1.29	1.29	17.69	3.681	0.818	tr|G3H3W4|G3H3W4_CRIGR	Insulin-degrading enzyme OS=Cricetulus griseus GN=I79_004954 PE=3 SV=1	CRIGR	1
	1704	1560	1.29	1.29	12.24	3.497	3.497	tr|G3HE03|G3HE03_CRIGR	Four and a half LIM domains protein 3 OS=Cricetulus griseus GN=I79_008772 PE=4 SV=1	CRIGR	1
	1705	1563	1.28	1.28	16.76	10.37	3.457	tr|G3HRR7|G3HRR7_CRIGR	Mitochondrial import inner membrane translocase subunit TIM44 OS=Cricetulus griseus GN=I79_013539 PE=4 SV=1	CRIGR	1
	1706	1565	1.28	1.28	27.08	5.729	5.729	tr|G3HFZ8|G3HFZ8_CRIGR	Synaptosomal-associated protein OS=Cricetulus griseus GN=I79_009516 PE=3 SV=1	CRIGR	1
	1707	1566	1.27	1.27	14.59	4.426	1.639	tr|G3HCL8|G3HCL8_CRIGR	Cdc42-interacting protein 4 OS=Cricetulus griseus GN=I79_008229 PE=4 SV=1	CRIGR	1
	1708	1569	1.25	1.25	13.31	1.893	0.7326	tr|G3H6L8|G3H6L8_CRIGR	Centrosomal protein of 170 kDa OS=Cricetulus griseus GN=I79_005983 PE=4 SV=1	CRIGR	1
	1709	1570	1.25	1.25	3.644	2.429	1.215	tr|G3IMD7|G3IMD7_CRIGR	Synembryn-A OS=Cricetulus griseus GN=I79_025076 PE=4 SV=1	CRIGR	1
	1710	1572	0	1.24	21.15	15.38	15.38	tr|G3H513|G3H513_CRIGR	40S ribosomal protein S27 OS=Cricetulus griseus GN=I79_005382 PE=3 SV=1	CRIGR	1
	1711	1572	0	1.24	15.38	15.38	15.38	tr|G3HNK0|G3HNK0_CRIGR	40S ribosomal protein S27 OS=Cricetulus griseus GN=I79_012338 PE=3 SV=1	CRIGR	1
	1712	1573	1.24	1.27	18.12	2.589	2.589	tr|G3GYP6|G3GYP6_CRIGR	Coiled-coil domain-containing protein 17 OS=Cricetulus griseus GN=I79_002951 PE=4 SV=1	CRIGR	1
	1713	1574	1.23	1.24	4.41	0.6963	0.3095	RRRRRtr|G3H0V1|G3H0V1_CRIGR	REVERSED Microtubule-associated protein 1A OS=Cricetulus griseus GN=I79_003770 PE=4 SV=1	CRIGR	1
	1714	1576	1.22	1.22	7.617	3.686	1.474	tr|G3HGW5|G3HGW5_CRIGR	Proteasomal ubiquitin receptor ADRM1 OS=Cricetulus griseus GN=I79_009857 PE=4 SV=1	CRIGR	1
	1715	1577	1.21	1.21	19.07	10.16	3.387	tr|G3I3J1|G3I3J1_CRIGR	Asparagine synthetase OS=Cricetulus griseus GN=I79_017999 PE=4 SV=1	CRIGR	1
	1716	1577	0	1.21	19.07	10.16	3.387	sp|P19891|ASNS_CRIGR	Asparagine synthetase [glutamine-hydrolyzing] OS=Cricetulus griseus GN=ASNS PE=2 SV=2	CRIGR	1
	1717	1579	1.19	1.19	18.01	8.033	4.432	tr|G3GZ25|G3GZ25_CRIGR	Ribonuclease P protein subunit p40 OS=Cricetulus griseus GN=I79_003076 PE=4 SV=1	CRIGR	1
	1718	1580	1.19	1.19	9.836	9.836	9.836	tr|G3IPH9|G3IPH9_CRIGR	UBX domain-containing protein 1 OS=Cricetulus griseus GN=I79_025890 PE=4 SV=1	CRIGR	1
	1719	1580	0	1.19	5.634	5.634	5.634	tr|G3I059|G3I059_CRIGR	UBX domain-containing protein 1 OS=Cricetulus griseus GN=I79_016735 PE=4 SV=1	CRIGR	1
	1720	1582	1.17	1.18	8.116	3.026	1.238	tr|G3ID92|G3ID92_CRIGR	Bromodomain-containing protein 3 OS=Cricetulus griseus GN=I79_021665 PE=4 SV=1	CRIGR	1
	1721	1582	0	1.17	4.979	3.043	1.245	tr|G3HM62|G3HM62_CRIGR	Bromodomain-containing protein 4 OS=Cricetulus griseus GN=I79_011810 PE=4 SV=1	CRIGR	1
	1722	1583	1.17	1.17	9.622	3.093	3.093	tr|G3IEG5|G3IEG5_CRIGR	Valacyclovir hydrolase OS=Cricetulus griseus GN=I79_022112 PE=4 SV=1	CRIGR	1
	1723	1584	1.16	1.16	15.1	1.473	0.2762	RRRRRtr|G3HII3|G3HII3_CRIGR	REVERSED Centrosomal protein of 290 kDa OS=Cricetulus griseus GN=I79_010454 PE=4 SV=1	CRIGR	1
	1724	1585	1.16	1.16	8.966	0.6462	0.6462	RRRRRtr|G3I9P2|G3I9P2_CRIGR	REVERSED Protein KIAA1199-like OS=Cricetulus griseus GN=I79_020296 PE=4 SV=1	CRIGR	1
	1725	1590	1.15	1.15	5.743	2.365	2.365	tr|G3II12|G3II12_CRIGR	Calcium-binding protein 39 OS=Cricetulus griseus GN=I79_023473 PE=4 SV=1	CRIGR	1
	1726	1590	0	1.15	5.09	2.096	2.096	tr|G3H8S6|G3H8S6_CRIGR	Calcium-binding protein 39-like OS=Cricetulus griseus GN=I79_006787 PE=4 SV=1	CRIGR	1
	1727	1592	1.14	1.14	20.42	14.44	3.169	tr|G3H9W3|G3H9W3_CRIGR	Poly(ADP-ribose) glycohydrolase ARH3 OS=Cricetulus griseus GN=I79_007194 PE=4 SV=1	CRIGR	1
	1728	1594	1.13	1.14	4.39	0.2331	0.2331	tr|G3HQ04|G3HQ04_CRIGR	Dynein heavy chain 6, axonemal OS=Cricetulus griseus GN=I79_012892 PE=4 SV=1	CRIGR	1
	1729	1595	1.13	1.13	9.451	2.439	2.439	tr|G3HPN1|G3HPN1_CRIGR	L-aminoadipate-semialdehyde dehydrogenase-phosphopantetheinyl transferase OS=Cricetulus griseus GN=I79_012746 PE=4 SV=1	CRIGR	1
	1730	1596	1.12	1.12	8.889	2.051	2.051	tr|G3I6T1|G3I6T1_CRIGR	Putative phospholipase B-like 2 OS=Cricetulus griseus GN=I79_019209 PE=4 SV=1	CRIGR	1
	1731	1597	1.11	1.13	11.06	2.813	1.455	tr|G3HGA3|G3HGA3_CRIGR	Rho guanine nucleotide exchange factor 2 OS=Cricetulus griseus GN=I79_009624 PE=4 SV=1	CRIGR	1
	1732	1599	1.1	1.1	47.22	13.89	13.89	tr|G3I387|G3I387_CRIGR	Protein BUD31-like OS=Cricetulus griseus GN=I79_017888 PE=4 SV=1	CRIGR	1
	1733	1600	1.09	1.1	8.967	2.989	2.989	tr|G3HV16|G3HV16_CRIGR	Niban-like protein 1 OS=Cricetulus griseus GN=I79_014789 PE=4 SV=1	CRIGR	1
	1734	1601	1.09	1.09	18.65	6.218	6.218	tr|G3HXT4|G3HXT4_CRIGR	Protein kinase C and casein kinase substrate in neurons protein 2 OS=Cricetulus griseus GN=I79_015848 PE=4 SV=1	CRIGR	1
	1735	1602	1.09	1.09	4.208	1.733	1.733	tr|G3ID40|G3ID40_CRIGR	Alpha-protein kinase 1 OS=Cricetulus griseus GN=I79_021606 PE=4 SV=1	CRIGR	1
	1736	1604	1.08	1.08	18.45	4.1	2.635	tr|G3H2W0|G3H2W0_CRIGR	U4/U6 small nuclear ribonucleoprotein Prp3 OS=Cricetulus griseus GN=I79_004563 PE=4 SV=1	CRIGR	1
	1737	1605	1.08	1.08	9.034	3.115	2.025	tr|G3H9S4|G3H9S4_CRIGR	Influenza virus NS1A-binding protein-like OS=Cricetulus griseus GN=I79_007154 PE=4 SV=1	CRIGR	1
	1738	1606	1.08	1.08	24.42	24.42	17.44	tr|G3H6X4|G3H6X4_CRIGR	Splicing factor 3B subunit 5 OS=Cricetulus griseus GN=I79_006094 PE=4 SV=1	CRIGR	1
	1739	1607	1.07	1.07	18.82	8.39	2.268	tr|G3H4H6|G3H4H6_CRIGR	AP-1 complex subunit mu-1 OS=Cricetulus griseus GN=I79_005177 PE=4 SV=1	CRIGR	1
	1740	1608	1.07	1.07	14	14	14	tr|G3H2A9|G3H2A9_CRIGR	Actin-related protein 2/3 complex subunit 3 OS=Cricetulus griseus GN=I79_004280 PE=4 SV=1	CRIGR	1
	1741	1609	1.06	1.06	14.83	3.155	3.155	tr|G3I2P6|G3I2P6_CRIGR	DnaJ-like subfamily C member 9 OS=Cricetulus griseus GN=I79_017689 PE=4 SV=1	CRIGR	1
	1742	1610	1.06	1.06	4.762	2.494	2.494	tr|G3GS62|G3GS62_CRIGR	NEDD8-activating enzyme E1 catalytic subunit OS=Cricetulus griseus GN=I79_000374 PE=4 SV=1	CRIGR	1
	1743	1613	1.04	1.04	35.71	33.04	9.821	tr|G3ILB7|G3ILB7_CRIGR	cAMP-regulated phosphoprotein 19 OS=Cricetulus griseus GN=I79_024681 PE=4 SV=1	CRIGR	1
	1744	1613	0	1.04	41.67	38.54	11.46	tr|G3GRI8|G3GRI8_CRIGR	cAMP-regulated phosphoprotein 19 OS=Cricetulus griseus GN=I79_000135 PE=4 SV=1	CRIGR	1
	1745	1614	1.04	1.04	11.46	1.235	1.235	tr|G3GS48|G3GS48_CRIGR	Protein SHQ1-like OS=Cricetulus griseus GN=I79_000358 PE=4 SV=1	CRIGR	1
	1746	1615	1.04	1.04	6.14	0.8772	0.8772	RRRRRtr|G3IHT2|G3IHT2_CRIGR	REVERSED Tubulin polyglutamylase TTLL13 OS=Cricetulus griseus GN=I79_023389 PE=4 SV=1	CRIGR	1
	1747	1616	0.02	1.13	10.92	3.995	1.465	tr|G3H137|G3H137_CRIGR	CLIP-associating protein 1 OS=Cricetulus griseus GN=I79_003861 PE=4 SV=1	CRIGR	1
	1748	1617	1.03	1.03	23.22	2.376	1.404	tr|G3H268|G3H268_CRIGR	CAP-Gly domain-containing linker protein 1 OS=Cricetulus griseus GN=I79_004314 PE=4 SV=1	CRIGR	1
	1749	1618	1.03	1.03	7.013	3.636	1.645	tr|G3HBD6|G3HBD6_CRIGR	C-jun-amino-terminal kinase-interacting protein 4 OS=Cricetulus griseus GN=I79_007764 PE=4 SV=1	CRIGR	1
	1750	1619	1.03	1.03	12.29	9.497	4.469	tr|Q7TQN0|Q7TQN0_CRIGR	Glutaminase (Fragment) OS=Cricetulus griseus PE=2 SV=1	CRIGR	1
	1751	1620	1.03	1.03	1.789	1.789	1.789	tr|G3HWU6|G3HWU6_CRIGR	Ubiquilin-2 OS=Cricetulus griseus GN=I79_015459 PE=4 SV=1	CRIGR	1
	1752	1622	1.02	1.02	13.27	1.276	1.276	RRRRRtr|G3GZR7|G3GZR7_CRIGR	REVERSED 6-phosphofructo-2-kinase/fructose-2, 6-biphosphatase 2 OS=Cricetulus griseus GN=I79_003367 PE=4 SV=1	CRIGR	1
	1753	1625	1.01	1.01	10.42	5.792	5.792	tr|G3I4D4|G3I4D4_CRIGR	Ribonuclease T2 OS=Cricetulus griseus GN=I79_018311 PE=3 SV=1	CRIGR	1
	1754	1627	1	1	14.5	5.651	2.703	tr|G3GU57|G3GU57_CRIGR	Replication factor C subunit 5 OS=Cricetulus griseus GN=I79_001208 PE=4 SV=1	CRIGR	1
	1755	1629	1	1	8.571	8.571	8.571	tr|G3HDW4|G3HDW4_CRIGR	Acyl-coenzyme A thioesterase 13 OS=Cricetulus griseus GN=I79_008731 PE=4 SV=1	CRIGR	1
	1756	1631	0.99	0.99	4.274	2.279	2.279	tr|G3HA11|G3HA11_CRIGR	Transducin beta-like protein 2 OS=Cricetulus griseus GN=I79_007249 PE=4 SV=1	CRIGR	1
	1757	1633	0.98	0.98	28.63	9.129	5.809	tr|G3GYY9|G3GYY9_CRIGR	Methylthioribulose-1-phosphate dehydratase OS=Cricetulus griseus GN=Apip PE=3 SV=1	CRIGR	1
	1758	1634	0.98	0.98	13.68	6.604	2.83	tr|G3I683|G3I683_CRIGR	Plasminogen activator inhibitor 1 RNA-binding protein OS=Cricetulus griseus GN=I79_018995 PE=4 SV=1	CRIGR	1
	1759	1635	0.98	0.98	2.333	0.4827	0.4827	tr|G3GWC0|G3GWC0_CRIGR	SH3 domain and tetratricopeptide repeats-containing protein 1 OS=Cricetulus griseus GN=I79_002041 PE=4 SV=1	CRIGR	1
	1760	1636	0.97	0.97	11.69	11.69	11.69	tr|G3I655|G3I655_CRIGR	DNA-directed RNA polymerases I, II, and III subunit RPABC5 OS=Cricetulus griseus GN=I79_018967 PE=4 SV=1	CRIGR	1
	1761	1636	0	0.97	8.257	8.257	8.257	tr|G3I3H5|G3I3H5_CRIGR	DNA-directed RNA polymerases I, II, and III subunit RPABC5 OS=Cricetulus griseus GN=I79_017983 PE=3 SV=1	CRIGR	1
	1762	1637	0.96	1.47	10.26	8.504	2.053	tr|G3H221|G3H221_CRIGR	Leucine-, glutamate-and lysine-rich protein 1 OS=Cricetulus griseus GN=I79_004222 PE=4 SV=1	CRIGR	1
	1763	1638	0.96	0.98	10.63	4.905	1.907	RRRRRtr|G3HS62|G3HS62_CRIGR	REVERSED Glutamine-rich protein 2 OS=Cricetulus griseus GN=I79_013689 PE=4 SV=1	CRIGR	1
	1764	1639	0.96	0.96	13.04	13.04	13.04	tr|G3IES8|G3IES8_CRIGR	Putative uncharacterized protein OS=Cricetulus griseus GN=I79_022231 PE=4 SV=1	CRIGR	1
	1765	1640	0.95	0.95	13.2	5.337	2.809	tr|G3H5L5|G3H5L5_CRIGR	Ribosomal protein S6 kinase alpha-3 OS=Cricetulus griseus GN=I79_005599 PE=4 SV=1	CRIGR	1
	1766	1641	0.95	0.95	9.455	1.455	1.455	RRRRRtr|G3HEC6|G3HEC6_CRIGR	REVERSED EVI5-like protein OS=Cricetulus griseus GN=I79_008908 PE=4 SV=1	CRIGR	1
	1767	1643	0.94	0.94	15.59	1.478	0.672	tr|G3HCD5|G3HCD5_CRIGR	Golgin subfamily A member 3 OS=Cricetulus griseus GN=I79_008143 PE=4 SV=1	CRIGR	1
	1768	1647	0	0.96	18.79	6.711	6.711	tr|G3HT49|G3HT49_CRIGR	Actin-related protein 2/3 complex subunit 1A OS=Cricetulus griseus GN=I79_014067 PE=4 SV=1	CRIGR	1
	1769	1648	0.93	0.93	16.79	1.866	1.866	tr|G3IIF4|G3IIF4_CRIGR	Keratin, type II cuticular Hb2 OS=Cricetulus griseus GN=I79_023622 PE=3 SV=1	CRIGR	1
	1770	1204	2.39	2.5	11.8	3.714	1.592	tr|G3I9F0|G3I9F0_CRIGR	General vesicular transport factor p115 OS=Cricetulus griseus GN=I79_020190 PE=4 SV=1	CRIGR	1
	1771	1649	0.01	0.89	7.163	0.551	0.551	RRRRRtr|G3GVE3|G3GVE3_CRIGR	REVERSED Caspase recruitment domain-containing protein 11 OS=Cricetulus griseus GN=I79_001680 PE=4 SV=1	CRIGR	1
	1772	1649	0	0.88	3.535	1.515	1.515	RRRRRtr|G3HHD8|G3HHD8_CRIGR	REVERSED Serine/threonine-protein kinase VRK1 OS=Cricetulus griseus GN=I79_010038 PE=4 SV=1	CRIGR	1
	1773	1650	0.93	0.93	12.03	3.093	3.093	tr|G3H083|G3H083_CRIGR	Abhydrolase domain-containing protein 10, mitochondrial (Fragment) OS=Cricetulus griseus GN=I79_003518 PE=4 SV=1	CRIGR	1
	1774	1651	0.93	0.93	8.929	8.929	8.929	tr|G3IN52|G3IN52_CRIGR	Fumarylacetoacetase OS=Cricetulus griseus GN=I79_025364 PE=4 SV=1	CRIGR	1
	1775	1653	0.92	0.93	13.1	5.348	2.674	tr|G3GX92|G3GX92_CRIGR	Calcium/calmodulin-dependent protein kinase type 1 OS=Cricetulus griseus GN=I79_002327 PE=4 SV=1	CRIGR	1
	1776	1653	0	0.88	12.11	6.92	3.46	tr|G3GVQ2|G3GVQ2_CRIGR	Calcium/calmodulin-dependent protein kinase type 1D OS=Cricetulus griseus GN=I79_001799 PE=4 SV=1	CRIGR	1
	1777	1654	0.91	0.92	13.2	3.2	3.2	tr|G3I1W4|G3I1W4_CRIGR	Eukaryotic initiation factor 4A-III OS=Cricetulus griseus GN=I79_017384 PE=4 SV=1	CRIGR	1
	1778	1655	0.91	0.92	1.741	1.741	1.741	RRRRRtr|G3IM11|G3IM11_CRIGR	REVERSED Hemicentin-1 OS=Cricetulus griseus GN=I79_024939 PE=4 SV=1	CRIGR	1
	1779	1658	0.91	0.91	2.303	0.9046	0.9046	tr|G3HA77|G3HA77_CRIGR	Stonin-2 OS=Cricetulus griseus GN=I79_007323 PE=4 SV=1	CRIGR	1
	1780	1659	0.91	0.91	4.275	2.045	2.045	tr|G3HAX2|G3HAX2_CRIGR	Retinoblastoma-binding protein 5 OS=Cricetulus griseus GN=I79_007582 PE=4 SV=1	CRIGR	1
	1781	1662	0.89	1.19	24.25	7.641	2.658	tr|G3GR83|G3GR83_CRIGR	1,5-anhydro-D-fructose reductase OS=Cricetulus griseus GN=I79_000026 PE=4 SV=1	CRIGR	1
	1782	1663	0.89	0.89	10.07	10.07	4.027	tr|G3HP11|G3HP11_CRIGR	Protein NipSnap-like 1 OS=Cricetulus griseus GN=I79_012514 PE=4 SV=1	CRIGR	1
	1783	1665	0.88	0.88	19.75	8.23	4.115	tr|G3HNI4|G3HNI4_CRIGR	Methylmalonate-semialdehyde dehydrogenase [acylating], mitochondrial OS=Cricetulus griseus GN=I79_012322 PE=3 SV=1	CRIGR	1
	1784	1666	0.88	0.88	8.661	4.987	1.837	tr|G3HK43|G3HK43_CRIGR	Ribonucleases P/MRP protein subunit POP1 OS=Cricetulus griseus GN=I79_011059 PE=4 SV=1	CRIGR	1
	1785	1667	0.88	0.88	5.285	2.846	2.846	tr|G3IE98|G3IE98_CRIGR	Arf-GAP domain and FG repeats-containing protein 1 OS=Cricetulus griseus GN=I79_022042 PE=4 SV=1	CRIGR	1
	1786	1669	0.87	0.97	13.37	7.558	4.07	tr|G3II80|G3II80_CRIGR	Centrin-2 OS=Cricetulus griseus GN=I79_023548 PE=4 SV=1	CRIGR	1
	1787	1670	0.87	0.87	7.681	0.4955	0.4955	tr|G3HPL6|G3HPL6_CRIGR	BAT2 domain-containing protein 1 OS=Cricetulus griseus GN=I79_012731 PE=4 SV=1	CRIGR	1
	1788	1671	0.87	0.87	17.63	10.26	2.885	tr|G3HWX8|G3HWX8_CRIGR	Estradiol 17-beta-dehydrogenase 12 OS=Cricetulus griseus GN=I79_015493 PE=3 SV=1	CRIGR	1
	1789	1672	0.87	0.87	7.368	2.368	2.368	tr|G3HG45|G3HG45_CRIGR	Citrate synthase, mitochondrial OS=Cricetulus griseus GN=I79_009564 PE=4 SV=1	CRIGR	1
	1790	1673	0.87	0.87	9.215	3.072	3.072	tr|G3HLP3|G3HLP3_CRIGR	Replication factor C subunit 2 OS=Cricetulus griseus GN=I79_011633 PE=4 SV=1	CRIGR	1
	1791	1674	0.86	0.87	20.11	7.821	7.821	tr|G3I3C4|G3I3C4_CRIGR	1,2-dihydroxy-3-keto-5-methylthiopentene dioxygenase OS=Cricetulus griseus GN=Adi1 PE=3 SV=1	CRIGR	1
	1792	1675	0.86	0.86	10.24	4.528	2.165	tr|G3HCK7|G3HCK7_CRIGR	General transcription factor IIF subunit 1 OS=Cricetulus griseus GN=I79_008218 PE=4 SV=1	CRIGR	1
	1793	1676	0.86	0.86	10.19	4.021	4.021	tr|G3H1X7|G3H1X7_CRIGR	Trans-2-enoyl-CoA reductase, mitochondrial OS=Cricetulus griseus GN=I79_004169 PE=4 SV=1	CRIGR	1
	1794	1679	0.85	0.85	7.586	3.793	3.793	tr|G3GUC8|G3GUC8_CRIGR	Obg-like ATPase 1 OS=Cricetulus griseus GN=I79_001282 PE=4 SV=1	CRIGR	1
	1795	1681	0.84	0.85	7.755	1.186	0.5474	tr|G3GTW0|G3GTW0_CRIGR	Condensin-2 complex subunit D3 OS=Cricetulus griseus GN=I79_001099 PE=4 SV=1	CRIGR	1
	1796	1685	0.83	0.83	8.867	0.5268	0.5268	tr|G3HLY7|G3HLY7_CRIGR	Serine/threonine-protein kinase WNK4 OS=Cricetulus griseus GN=I79_011731 PE=4 SV=1	CRIGR	1
	1797	1688	0.83	0.83	19.57	6.522	6.522	tr|G3IFV7|G3IFV7_CRIGR	Putative uncharacterized protein OS=Cricetulus griseus GN=I79_022631 PE=4 SV=1	CRIGR	1
	1798	1688	0	0.82	6.934	1.095	1.095	RRRRRtr|G3H3X4|G3H3X4_CRIGR	REVERSED BCoR-like protein 1 OS=Cricetulus griseus GN=I79_004965 PE=4 SV=1	CRIGR	1
	1799	1689	0.82	0.82	16.87	3.681	3.681	tr|G3IEN3|G3IEN3_CRIGR	39S ribosomal protein L1, mitochondrial OS=Cricetulus griseus GN=I79_022184 PE=4 SV=1	CRIGR	1
	1800	1691	0.82	0.82	8.118	8.118	3.321	tr|G3H6Y0|G3H6Y0_CRIGR	Proteasome inhibitor PI31 subunit OS=Cricetulus griseus GN=I79_006104 PE=4 SV=1	CRIGR	1
	1801	1692	0.82	0.82	4.795	2.055	2.055	tr|G3H626|G3H626_CRIGR	Purine-rich element-binding protein gamma (Fragment) OS=Cricetulus griseus GN=I79_005759 PE=4 SV=1	CRIGR	1
	1802	1692	0	0.81	4.19	1.143	1.143	tr|G3GXZ8|G3GXZ8_CRIGR	Vesicular inhibitory amino acid transporter OS=Cricetulus griseus GN=I79_002648 PE=4 SV=1	CRIGR	1
	1803	1696	0.79	3.42	13.7	9.98	2.74	tr|G3H298|G3H298_CRIGR	Serine/threonine-protein phosphatase OS=Cricetulus griseus GN=I79_004269 PE=3 SV=1	CRIGR	1
	1804	1697	0.79	0.79	6.15	0.958	0.2781	tr|G3HUL2|G3HUL2_CRIGR	Aldehyde oxidase OS=Cricetulus griseus GN=I79_014624 PE=4 SV=1	CRIGR	1
	1805	1700	0.79	0.79	8.174	2.725	2.725	tr|G3GWN4|G3GWN4_CRIGR	Poly(A)-specific ribonuclease PARN OS=Cricetulus griseus GN=I79_002163 PE=4 SV=1	CRIGR	1
	1806	1702	0.79	0.79	25	13.89	13.89	tr|G3HMP0|G3HMP0_CRIGR	Protein TFG OS=Cricetulus griseus GN=I79_012009 PE=4 SV=1	CRIGR	1
	1807	1703	0.78	0.83	11.96	5.521	3.374	tr|G3H675|G3H675_CRIGR	Nucleoporin Nup37 OS=Cricetulus griseus GN=I79_005828 PE=4 SV=1	CRIGR	1
	1808	1584	1.16	1.16	15.1	1.473	0.2762	RRRRRtr|G3HII3|G3HII3_CRIGR	REVERSED Centrosomal protein of 290 kDa OS=Cricetulus griseus GN=I79_010454 PE=4 SV=1	CRIGR	1
	1809	1705	0.77	0.78	12.2	4.828	1.398	tr|G3HFN7|G3HFN7_CRIGR	Pyridoxal-dependent decarboxylase domain-containing protein 1 OS=Cricetulus griseus GN=I79_009400 PE=3 SV=1	CRIGR	1
	1810	1707	0.77	0.77	20.77	4.589	4.589	tr|G3H9I6|G3H9I6_CRIGR	Testin OS=Cricetulus griseus GN=I79_007059 PE=4 SV=1	CRIGR	1
	1811	1710	0.76	0.76	23.98	1.907	1.907	RRRRRtr|G3HPM4|G3HPM4_CRIGR	REVERSED RAB6-interacting golgin OS=Cricetulus griseus GN=I79_012739 PE=4 SV=1	CRIGR	1
	1812	1710	0	0.74	13.73	13.73	13.73	tr|G3I1U2|G3I1U2_CRIGR	Putative uncharacterized protein OS=Cricetulus griseus GN=I79_017360 PE=4 SV=1	CRIGR	1
	1813	1711	0.75	0.76	15.51	6.271	2.64	tr|G3IL63|G3IL63_CRIGR	Caspase-7 OS=Cricetulus griseus GN=I79_024625 PE=1 SV=1	CRIGR	1
	1814	1713	0.75	0.75	4.331	4.331	4.331	RRRRRtr|G3IKL3|G3IKL3_CRIGR	REVERSED Ribosomal protein S6 kinase alpha-4 OS=Cricetulus griseus GN=I79_024416 PE=4 SV=1	CRIGR	1
	1815	1714	0.74	0.74	6.229	1.01	1.01	tr|G3ICH0|G3ICH0_CRIGR	Reticulon OS=Cricetulus griseus GN=I79_021368 PE=4 SV=1	CRIGR	1
	1816	1716	0.74	0.74	9.769	2.828	2.828	tr|G3IEK4|G3IEK4_CRIGR	Angio-associated migratory cell protein OS=Cricetulus griseus GN=I79_022151 PE=4 SV=1	CRIGR	1
	1817	1717	0.73	0.73	7.106	1.045	1.045	tr|G3GRB9|G3GRB9_CRIGR	Melanoma inhibitory activity protein 3 OS=Cricetulus griseus GN=I79_000063 PE=4 SV=1	CRIGR	1
	1818	1718	0.73	0.73	19.94	6.461	2.809	tr|G3HZE3|G3HZE3_CRIGR	Sialidase-1 OS=Cricetulus griseus GN=I79_016442 PE=4 SV=1	CRIGR	1
	1819	1718	0	0.73	17.32	5.61	2.439	tr|B8Y440|B8Y440_CRIGR	Sialidase I OS=Cricetulus griseus GN=Neu1 PE=2 SV=1	CRIGR	1
	1820	1723	0.71	0.71	11.05	0.8226	0.8226	tr|G3GYB9|G3GYB9_CRIGR	Misshapen-like kinase 1 OS=Cricetulus griseus GN=I79_002794 PE=4 SV=1	CRIGR	1
	1821	1724	0.71	0.71	25.22	7.331	3.226	tr|G3IN68|G3IN68_CRIGR	CD2 antigen cytoplasmic tail-binding protein 2 OS=Cricetulus griseus GN=I79_025380 PE=4 SV=1	CRIGR	1
	1822	1726	0.71	0.71	14.11	2.871	2.871	tr|Q6V9Y0|Q6V9Y0_CRIGR	AP-3 complex subunit mu-1 OS=Cricetulus griseus GN=I79_002181 PE=2 SV=1	CRIGR	1
	1823	1728	0.71	0.71	9.286	9.286	9.286	RRRRRtr|G3I1F8|G3I1F8_CRIGR	REVERSED PDZ domain-containing protein 11 OS=Cricetulus griseus GN=I79_017213 PE=4 SV=1	CRIGR	1
	1824	1730	0.7	0.7	11.66	1.912	1.912	tr|G3I4Z0|G3I4Z0_CRIGR	Signal transducing adapter molecule 2 OS=Cricetulus griseus GN=I79_018531 PE=4 SV=1	CRIGR	1
	1825	1733	0	0.62	4.531	0.5376	0.5376	RRRRRtr|G3GRD7|G3GRD7_CRIGR	REVERSED Rab3 GTPase-activating protein non-catalytic subunit OS=Cricetulus griseus GN=I79_000080 PE=4 SV=1	CRIGR	1
	1826	1734	0.69	0.69	15.24	2.744	2.744	RRRRRtr|G3I359|G3I359_CRIGR	REVERSED Adenosylhomocysteinase OS=Cricetulus griseus GN=I79_017860 PE=3 SV=1	CRIGR	1
	1827	1735	0.69	0.69	2.786	2.786	2.786	tr|G3I150|G3I150_CRIGR	Pescadillo-like OS=Cricetulus griseus GN=I79_017096 PE=4 SV=1	CRIGR	1
	1828	1738	0.68	0.68	12.03	0.8021	0.8021	RRRRRtr|G3IET1|G3IET1_CRIGR	REVERSED WD repeat-containing protein 63 OS=Cricetulus griseus GN=I79_022235 PE=4 SV=1	CRIGR	1
	1829	1739	0.68	0.68	14.42	8.372	2.791	tr|G3HCX5|G3HCX5_CRIGR	Glutaryl-CoA dehydrogenase, mitochondrial OS=Cricetulus griseus GN=I79_008343 PE=3 SV=1	CRIGR	1
	1830	1743	0.67	0.67	9.921	1.582	1.078	tr|G3HA14|G3HA14_CRIGR	Tyrosine-protein kinase BAZ1B (Fragment) OS=Cricetulus griseus GN=I79_007253 PE=4 SV=1	CRIGR	1
	1831	1746	0.67	0.67	6.736	1.382	1.382	RRRRRtr|G3HC68|G3HC68_CRIGR	REVERSED SHC-transforming protein 1 OS=Cricetulus griseus GN=I79_008018 PE=4 SV=1	CRIGR	1
	1832	1748	0.66	0.66	5.237	0.9975	0.9975	RRRRRtr|G3HBQ0|G3HBQ0_CRIGR	REVERSED Transducin beta-like protein 3 OS=Cricetulus griseus GN=I79_007957 PE=4 SV=1	CRIGR	1
	1833	1749	0.66	0.66	2.743	0.8	0.8	tr|G3IEU5|G3IEU5_CRIGR	Otoancorin OS=Cricetulus griseus GN=I79_022249 PE=4 SV=1	CRIGR	1
	1834	1752	0.65	0.65	21.3	6.481	6.481	tr|G3IE92|G3IE92_CRIGR	Peroxiredoxin-2 OS=Cricetulus griseus GN=I79_022036 PE=4 SV=1	CRIGR	1
	1835	1754	0.65	0.65	17.7	8.85	8.85	tr|G3HC18|G3HC18_CRIGR	Interleukin enhancer-binding factor 2 OS=Cricetulus griseus GN=I79_008061 PE=4 SV=1	CRIGR	1
	1836	1756	0.64	0.71	6.629	0.5576	0.5576	tr|G3H6A7|G3H6A7_CRIGR	Putative global transcription activator SNF2L4 OS=Cricetulus griseus GN=I79_005861 PE=4 SV=1	CRIGR	1
	1837	1762	0.63	0.63	19.31	3.004	3.004	RRRRRtr|G3I9M6|G3I9M6_CRIGR	REVERSED Putative lipoyltransferase 2, mitochondrial OS=Cricetulus griseus GN=I79_020280 PE=3 SV=1	CRIGR	1
	1838	1763	0.63	0.63	52.94	13.73	13.73	tr|G3I2Q5|G3I2Q5_CRIGR	Charged multivesicular body protein 2a OS=Cricetulus griseus GN=I79_017698 PE=4 SV=1	CRIGR	1
	1839	1764	0.63	0.63	1.332	0.7172	0.7172	RRRRRtr|G3GVA1|G3GVA1_CRIGR	REVERSED Integrin alpha-9 OS=Cricetulus griseus GN=I79_001635 PE=3 SV=1	CRIGR	1
	1840	1766	0.62	0.62	5.472	1.415	1.415	tr|G3GXW5|G3GXW5_CRIGR	Protein NDRG3 OS=Cricetulus griseus GN=I79_002611 PE=4 SV=1	CRIGR	1
	1841	1769	0.61	0.61	5.53	0.964	0.4059	tr|G3HGE2|G3HGE2_CRIGR	Protein TANC2 (Fragment) OS=Cricetulus griseus GN=I79_009666 PE=4 SV=1	CRIGR	1
	1842	1770	0.61	0.61	14.48	3.064	3.064	tr|Q3HR09|Q3HR09_CRIGR	Guanine nucleotide binding protein alpha 11 OS=Cricetulus griseus GN=GNA11 PE=2 SV=1	CRIGR	1
	1843	1774	0.6	0.6	9.579	9.579	5.747	tr|G3HTV2|G3HTV2_CRIGR	WW domain-binding protein 2 OS=Cricetulus griseus GN=I79_014332 PE=4 SV=1	CRIGR	1
	1844	1777	0.59	0.59	13.48	4.783	4.783	tr|G3GWS0|G3GWS0_CRIGR	Protein LSM14-like B OS=Cricetulus griseus GN=I79_002201 PE=4 SV=1	CRIGR	1
	1845	1259	2.14	2.14	13.46	1.587	0.6211	tr|G3HDV7|G3HDV7_CRIGR	Leucine-rich repeat-containing protein 16A OS=Cricetulus griseus GN=I79_008723 PE=4 SV=1	CRIGR	1
	1846	1781	0.58	0.58	9.79	3.03	3.03	tr|G3HLI3|G3HLI3_CRIGR	MAGUK p55 subfamily member 3 OS=Cricetulus griseus GN=I79_011573 PE=4 SV=1	CRIGR	1
	1847	1782	0.58	0.58	2.669	0.924	0.924	tr|G3HF54|G3HF54_CRIGR	AT-rich interactive domain-containing protein 3A OS=Cricetulus griseus GN=I79_009208 PE=4 SV=1	CRIGR	1
	1848	1784	0.57	0.57	6.774	0.6285	0.6285	RRRRRtr|G3HKS9|G3HKS9_CRIGR	REVERSED Proto-oncogene tyrosine-protein kinase receptor ret OS=Cricetulus griseus GN=I79_011309 PE=3 SV=1	CRIGR	1
	1849	1787	0.57	0.57	12.77	4.38	4.38	tr|G3HUQ0|G3HUQ0_CRIGR	UPF0363 protein C7orf20-like OS=Cricetulus griseus GN=I79_014664 PE=4 SV=1	CRIGR	1
	1850	1788	0.57	0.57	6.14	6.14	6.14	tr|G3IPQ2|G3IPQ2_CRIGR	60S ribosomal protein L19 OS=Cricetulus griseus GN=I79_025971 PE=4 SV=1	CRIGR	1
	1851	1788	0	0.57	1.566	1.566	1.566	tr|G3HGG5|G3HGG5_CRIGR	Aromatic-L-amino-acid decarboxylase OS=Cricetulus griseus GN=I79_009692 PE=3 SV=1	CRIGR	1
	1852	1788	0	0.57	10.77	10.77	10.77	tr|G3GUF0|G3GUF0_CRIGR	Ribosomal protein L19 OS=Cricetulus griseus GN=I79_001309 PE=3 SV=1	CRIGR	1
	1853	1790	0.56	0.56	18.97	3.879	3.879	tr|G3IMK2|G3IMK2_CRIGR	Tight junction protein ZO-2 OS=Cricetulus griseus GN=I79_025142 PE=4 SV=1	CRIGR	1
	1854	1791	0.56	0.56	8.123	0.9804	0.9804	tr|G3HNJ4|G3HNJ4_CRIGR	L-gulonolactone oxidase OS=Cricetulus griseus GN=I79_012332 PE=4 SV=1	CRIGR	1
	1855	1794	0.55	0.55	9.271	0.6339	0.6339	tr|G3HUJ4|G3HUJ4_CRIGR	Amyotrophic lateral sclerosis 2 chromosomal region candidate gene 11 protein OS=Cricetulus griseus GN=I79_014606 PE=4 SV=1	CRIGR	1
	1856	1136	2.86	2.86	15.82	3.68	1.84	tr|G3HP44|G3HP44_CRIGR	Kinesin-like protein KIF15 (Fragment) OS=Cricetulus griseus GN=I79_012548 PE=3 SV=1	CRIGR	1
	1857	1798	0.54	0.54	4.451	0.8345	0.8345	tr|G3HFU2|G3HFU2_CRIGR	Cadherin-7 OS=Cricetulus griseus GN=I79_009459 PE=3 SV=1	CRIGR	1
	1858	1799	0.54	0.54	9.524	9.524	9.524	tr|G3IJD6|G3IJD6_CRIGR	Putative D-tyrosyl-tRNA(Tyr) deacylase 2 OS=Cricetulus griseus GN=I79_023969 PE=4 SV=1	CRIGR	1
	1859	1800	0.54	0.54	2.361	2.361	2.361	tr|G3HSF9|G3HSF9_CRIGR	Growth factor receptor-bound protein 14 OS=Cricetulus griseus GN=I79_013790 PE=4 SV=1	CRIGR	1
	1860	1802	0.53	0.53	3.808	1.804	1.804	tr|G3HEE6|G3HEE6_CRIGR	Transmembrane protein 175 OS=Cricetulus griseus GN=I79_008930 PE=4 SV=1	CRIGR	1
	1861	1803	0.53	0.53	2.671	1.187	1.187	RRRRRtr|G3IE71|G3IE71_CRIGR	REVERSED Arachidonate 5-lipoxygenase OS=Cricetulus griseus GN=I79_022015 PE=3 SV=1	CRIGR	1
	1862	1808	0.51	0.51	5.369	2.563	1.525	tr|G3HKR3|G3HKR3_CRIGR	Tyrosine-protein phosphatase non-receptor type 23 OS=Cricetulus griseus GN=I79_011292 PE=4 SV=1	CRIGR	1
	1863	1809	0.51	0.51	26.87	8.955	8.955	RRRRRtr|G3HA38|G3HA38_CRIGR	REVERSED PRKR-interacting protein 1 OS=Cricetulus griseus GN=I79_007280 PE=4 SV=1	CRIGR	1
	1864	1810	0.51	0.51	21.72	6.566	6.566	RRRRRtr|Q8NHF5|Q8NHF5_CRIGR	REVERSED AID OS=Cricetulus griseus GN=AID PE=2 SV=1	CRIGR	1
	1865	1810	0	0.51	21.72	6.566	6.566	RRRRRtr|Q8NHF4|Q8NHF4_CRIGR	REVERSED AID OS=Cricetulus griseus GN=AID PE=2 SV=1	CRIGR	1
	1866	1810	0	0.51	21.72	6.566	6.566	RRRRRtr|Q8NHF3|Q8NHF3_CRIGR	REVERSED AID OS=Cricetulus griseus GN=AID PE=2 SV=1	CRIGR	1
	1867	1810	0	0.51	21.72	6.566	6.566	RRRRRtr|Q8NHF1|Q8NHF1_CRIGR	REVERSED AID OS=Cricetulus griseus GN=AID PE=2 SV=1	CRIGR	1
	1868	1810	0	0.51	21.72	6.566	6.566	RRRRRtr|Q8NHF0|Q8NHF0_CRIGR	REVERSED AID OS=Cricetulus griseus GN=AID PE=2 SV=1	CRIGR	1
	1869	1810	0	0.51	21.72	6.566	6.566	RRRRRtr|Q8NHE9|Q8NHE9_CRIGR	REVERSED AID OS=Cricetulus griseus GN=AID PE=2 SV=1	CRIGR	1
	1870	1810	0	0.51	21.72	6.566	6.566	RRRRRtr|Q8NHE8|Q8NHE8_CRIGR	REVERSED AID OS=Cricetulus griseus GN=AID PE=2 SV=1	CRIGR	1
	1871	1810	0	0.51	21.94	6.633	6.633	RRRRRtr|Q8NHE7|Q8NHE7_CRIGR	REVERSED AID (Fragment) OS=Cricetulus griseus GN=AID PE=2 SV=1	CRIGR	1
	1872	1810	0	0.51	23.76	7.182	7.182	RRRRRtr|Q8NHE6|Q8NHE6_CRIGR	REVERSED AID (Fragment) OS=Cricetulus griseus GN=AID PE=2 SV=1	CRIGR	1
	1873	1810	0	0.51	21.72	6.566	6.566	RRRRRtr|Q8N147|Q8N147_CRIGR	REVERSED AID OS=Cricetulus griseus GN=AID PE=2 SV=1	CRIGR	1
	1874	1810	0	0.51	16.16	6.566	6.566	RRRRRtr|Q8NHF6|Q8NHF6_CRIGR	REVERSED AID OS=Cricetulus griseus GN=AID PE=2 SV=1	CRIGR	1
	1875	1810	0	0.51	17.68	6.566	6.566	RRRRRtr|Q8NHF2|Q8NHF2_CRIGR	REVERSED AID OS=Cricetulus griseus GN=AID PE=2 SV=1	CRIGR	1
	1876	1811	0.51	0.51	8.785	2.243	2.243	RRRRRtr|G3H8Y2|G3H8Y2_CRIGR	REVERSED Formimidoyltransferase-cyclodeaminase OS=Cricetulus griseus GN=I79_006831 PE=4 SV=1	CRIGR	1
	1877	1812	0.51	0.51	12.57	4.188	4.188	tr|G3HMA7|G3HMA7_CRIGR	Synaptobrevin-like YKT6 OS=Cricetulus griseus GN=I79_011858 PE=4 SV=1	CRIGR	1
	1878	1813	0.51	0.51	39.18	11.34	11.34	tr|G3GX80|G3GX80_CRIGR	Uncharacterized protein C16orf14 OS=Cricetulus griseus GN=I79_002395 PE=4 SV=1	CRIGR	1
	1879	1816	0.51	0.51	3.289	2.192	2.192	tr|G3H9Z5|G3H9Z5_CRIGR	Epidermal growth factor receptor kinase substrate 8 OS=Cricetulus griseus GN=I79_007228 PE=4 SV=1	CRIGR	1
	1880	1817	0.51	0.51	6.707	2.744	2.744	RRRRRtr|G3I476|G3I476_CRIGR	REVERSED Coiled-coil domain-containing protein 68 OS=Cricetulus griseus GN=I79_018252 PE=4 SV=1	CRIGR	1
	1881	1818	0.51	0.51	2.979	2.979	2.979	tr|G3HT76|G3HT76_CRIGR	Magnesium transporter NIPA2 OS=Cricetulus griseus GN=I79_014097 PE=4 SV=1	CRIGR	1
	1882	1821	0.5	0.51	2.239	2.239	2.239	tr|G3I016|G3I016_CRIGR	RNA-binding protein NOB1 OS=Cricetulus griseus GN=I79_016688 PE=4 SV=1	CRIGR	1
	1883	1822	0.5	0.5	8.685	2.582	2.582	RRRRRtr|G3HAG4|G3HAG4_CRIGR	REVERSED Tyrosine aminotransferase OS=Cricetulus griseus GN=I79_007415 PE=3 SV=1	CRIGR	1
	1884	1826	0.49	0.5	8.268	4.331	4.331	tr|G3GWU6|G3GWU6_CRIGR	Ras-related protein Rab-22A OS=Cricetulus griseus GN=I79_002231 PE=3 SV=1	CRIGR	1
	1885	1828	0.49	0.49	4.673	0.5607	0.5607	RRRRRtr|G3HUV4|G3HUV4_CRIGR	REVERSED Protein MICAL-2 OS=Cricetulus griseus GN=I79_014722 PE=4 SV=1	CRIGR	1
	1886	1832	0.48	0.48	4.519	1.179	1.179	RRRRRtr|G3HX53|G3HX53_CRIGR	REVERSED Scavenger receptor class B member 1 OS=Cricetulus griseus GN=I79_015570 PE=4 SV=1	CRIGR	1
	1887	1832	0.01	0.38	7.258	0.2624	0.2624	RRRRRtr|G3HI85|G3HI85_CRIGR	REVERSED Acetyl-CoA carboxylase 2 OS=Cricetulus griseus GN=I79_010352 PE=4 SV=1	CRIGR	1
	1888	1832	0	0.48	4.519	1.179	1.179	RRRRRsp|Q60417|SCRB1_CRIGR	REVERSED Scavenger receptor class B member 1 OS=Cricetulus griseus GN=SCARB1 PE=2 SV=1	CRIGR	1
	1889	1833	0.47	1.29	10.81	2.002	0.6006	RRRRRtr|G3HCC3|G3HCC3_CRIGR	REVERSED Serine/threonine-protein kinase ULK1 (Fragment) OS=Cricetulus griseus GN=I79_008130 PE=4 SV=1	CRIGR	1
	1890	1839	0.47	0.47	6.094	2.216	2.216	tr|G3I1S8|G3I1S8_CRIGR	Growth/differentiation factor 3 OS=Cricetulus griseus GN=I79_017347 PE=3 SV=1	CRIGR	1
	1891	1840	0.47	0.47	10.86	3.62	3.62	tr|G3HHE9|G3HHE9_CRIGR	UPF0600 protein C5orf51-like OS=Cricetulus griseus GN=I79_010050 PE=4 SV=1	CRIGR	1
	1892	1844	0.46	0.46	13.15	1.949	1.949	tr|G3HAE9|G3HAE9_CRIGR	Nebulette OS=Cricetulus griseus GN=I79_007398 PE=4 SV=1	CRIGR	1
	1893	1849	0.46	0.46	3.67	3.67	3.67	tr|G3ICE3|G3ICE3_CRIGR	COP9 signalosome complex subunit 5 OS=Cricetulus griseus GN=I79_021338 PE=4 SV=1	CRIGR	1
	1894	1850	0.46	0.46	9.677	9.677	9.677	tr|G3HHT8|G3HHT8_CRIGR	40S ribosomal protein S5 OS=Cricetulus griseus GN=I79_010198 PE=4 SV=1	CRIGR	1
	1895	1635	0.98	0.98	2.333	0.4827	0.4827	tr|G3GWC0|G3GWC0_CRIGR	SH3 domain and tetratricopeptide repeats-containing protein 1 OS=Cricetulus griseus GN=I79_002041 PE=4 SV=1	CRIGR	1
	1896	1879	0.4	2.08	8.027	1.672	1.087	tr|G3H1K6|G3H1K6_CRIGR	Disintegrin and metalloproteinase domain-containing protein 9 OS=Cricetulus griseus GN=I79_004035 PE=4 SV=1	CRIGR	1
	1897	1649	0	0.88	3.535	1.515	1.515	RRRRRtr|G3HHD8|G3HHD8_CRIGR	REVERSED Serine/threonine-protein kinase VRK1 OS=Cricetulus griseus GN=I79_010038 PE=4 SV=1	CRIGR	1
	1898	1916	0.36	0.45	10.83	2.385	1.284	RRRRRtr|G3ICU3|G3ICU3_CRIGR	REVERSED Autophagy-related protein 16-1 OS=Cricetulus griseus GN=I79_021494 PE=4 SV=1	CRIGR	1
	1899	1919	0.36	0.36	5.072	0.4611	0.217	tr|G3I905|G3I905_CRIGR	E3 ubiquitin-protein ligase UBR4 OS=Cricetulus griseus GN=I79_020038 PE=4 SV=1	CRIGR	1
	1900	1921	0.36	0.36	14.95	1.742	1.742	tr|G3I409|G3I409_CRIGR	Beta-adrenergic receptor kinase 1 OS=Cricetulus griseus GN=I79_018180 PE=3 SV=1	CRIGR	1
	1901	1934	0.35	1.25	11	3.079	0.4399	tr|G3HJT2|G3HJT2_CRIGR	Serine/threonine-protein phosphatase 4 regulatory subunit 3B OS=Cricetulus griseus GN=I79_010933 PE=4 SV=1	CRIGR	1
	1902	1803	0.53	0.53	2.671	1.187	1.187	RRRRRtr|G3IE71|G3IE71_CRIGR	REVERSED Arachidonate 5-lipoxygenase OS=Cricetulus griseus GN=I79_022015 PE=3 SV=1	CRIGR	1
	1903	1962	0.01	2.07	9.756	4.878	2.439	tr|G3HR61|G3HR61_CRIGR	60S ribosomal protein L7-like 1 OS=Cricetulus griseus GN=I79_013324 PE=3 SV=1	CRIGR	1
	1904	1974	0.31	0.31	5.512	0.259	0.259	tr|G3I358|G3I358_CRIGR	A-kinase anchor protein 13 OS=Cricetulus griseus GN=I79_017859 PE=4 SV=1	CRIGR	1
	1905	1975	0.31	0.31	4.953	0.2425	0.2425	RRRRRtr|G3I0L2|G3I0L2_CRIGR	REVERSED Beta/gamma crystallin domain-containing protein 3 OS=Cricetulus griseus GN=I79_016900 PE=4 SV=1	CRIGR	1
	1906	1879	0.4	2.08	8.027	1.672	1.087	tr|G3H1K6|G3H1K6_CRIGR	Disintegrin and metalloproteinase domain-containing protein 9 OS=Cricetulus griseus GN=I79_004035 PE=4 SV=1	CRIGR	1
	1907	2015	0.27	1.23	13.69	2.229	0.6369	tr|G3I457|G3I457_CRIGR	Serine/threonine-protein kinase N2 OS=Cricetulus griseus GN=I79_018232 PE=4 SV=1	CRIGR	1
	1908	2028	0.26	0.27	6.846	2.445	2.445	tr|G3I324|G3I324_CRIGR	Rho GTPase-activating protein 20 OS=Cricetulus griseus GN=I79_017824 PE=4 SV=1	CRIGR	1
	1909	2039	0.25	0.4	8.708	2.949	1.264	tr|G3H7G2|G3H7G2_CRIGR	TBC1 domain family member 2A OS=Cricetulus griseus GN=I79_006293 PE=4 SV=1	CRIGR	1
	1910	2078	0.23	0.23	1.173	1.173	1.173	RRRRRtr|G3H267|G3H267_CRIGR	REVERSED Vacuolar protein sorting-associated protein 33A OS=Cricetulus griseus GN=I79_004313 PE=4 SV=1	CRIGR	1
	1911	2089	0.21	0.24	6.716	1.99	1.99	RRRRRtr|G3I6S7|G3I6S7_CRIGR	REVERSED LIM/homeobox protein Lhx5 OS=Cricetulus griseus GN=I79_019205 PE=3 SV=1	CRIGR	1
	1912	2089	0	0.21	9.524	9.524	9.524	RRRRRtr|G3H9D2|G3H9D2_CRIGR	REVERSED LIM/homeobox protein Lhx1 OS=Cricetulus griseus GN=I79_007000 PE=4 SV=1	CRIGR	1
	1913	2096	0.21	0.21	5.753	0.7306	0.7306	tr|G3IFK3|G3IFK3_CRIGR	Myelin gene regulatory factor OS=Cricetulus griseus GN=I79_022526 PE=4 SV=1	CRIGR	1
	1914	2112	0.2	0.21	4.883	2.972	2.972	tr|G3H4A9|G3H4A9_CRIGR	Mpv17-like protein 2 OS=Cricetulus griseus GN=I79_005109 PE=4 SV=1	CRIGR	1
	1915	1510	1.59	1.59	9.326	2.726	1.578	tr|G3HSJ1|G3HSJ1_CRIGR	Nicalin OS=Cricetulus griseus GN=I79_013824 PE=4 SV=1	CRIGR	1
	1916	1637	0.96	1.47	10.26	8.504	2.053	tr|G3H221|G3H221_CRIGR	Leucine-, glutamate-and lysine-rich protein 1 OS=Cricetulus griseus GN=I79_004222 PE=4 SV=1	CRIGR	1
	1917	1670	0.87	0.87	7.681	0.4955	0.4955	tr|G3HPL6|G3HPL6_CRIGR	BAT2 domain-containing protein 1 OS=Cricetulus griseus GN=I79_012731 PE=4 SV=1	CRIGR	1
	1918	2149	0.19	0.19	10.47	3.101	3.101	RRRRRtr|G3GUL2|G3GUL2_CRIGR	REVERSED Neurotrophin-3 OS=Cricetulus griseus GN=I79_001375 PE=3 SV=1	CRIGR	1
	1919	2155	0.18	2.25	10.19	2.24	1.344	tr|G3HTL1|G3HTL1_CRIGR	Spermatogenesis-associated protein 5 OS=Cricetulus griseus GN=I79_014239 PE=4 SV=1	CRIGR	1
	1920	2156	0.18	1.21	40.38	40.38	13.46	tr|G3I8L3|G3I8L3_CRIGR	Cofilin-2 OS=Cricetulus griseus GN=I79_019889 PE=4 SV=1	CRIGR	1
	1921	1602	1.09	1.09	4.208	1.733	1.733	tr|G3ID40|G3ID40_CRIGR	Alpha-protein kinase 1 OS=Cricetulus griseus GN=I79_021606 PE=4 SV=1	CRIGR	1
	1922	2164	0.18	0.18	10.9	1.288	1.288	tr|G3HKH7|G3HKH7_CRIGR	Partitioning defective 3-like OS=Cricetulus griseus GN=I79_011203 PE=4 SV=1	CRIGR	1
	1923	2185	0.18	0.18	2.703	2.703	2.703	RRRRRtr|G3I2W7|G3I2W7_CRIGR	REVERSED Protein SCO2-like, mitochondrial OS=Cricetulus griseus GN=I79_017762 PE=4 SV=1	CRIGR	1
	1924	2196	0.17	0.17	10.73	1.724	1.724	tr|G3H7Z4|G3H7Z4_CRIGR	Coiled-coil domain-containing protein 19, mitochondrial OS=Cricetulus griseus GN=I79_006490 PE=4 SV=1	CRIGR	1
	1925	2232	0.15	1.69	9.669	3.177	0.8287	tr|G3I8X2|G3I8X2_CRIGR	Long-chain-fatty-acid--CoA ligase 1 OS=Cricetulus griseus GN=I79_020004 PE=4 SV=1	CRIGR	1
	1926	2256	0.15	0.15	3.153	3.153	3.153	tr|G3H4C9|G3H4C9_CRIGR	Tyrosine-protein kinase JAK3 OS=Cricetulus griseus GN=I79_005131 PE=4 SV=1	CRIGR	1
	1927	2262	0.14	0.16	8.251	0.7639	0.7639	tr|G3H4W9|G3H4W9_CRIGR	Carbamoyl-phosphate synthase [ammonia], mitochondrial OS=Cricetulus griseus GN=I79_005332 PE=4 SV=1	CRIGR	1
	1928	1215	2.34	2.34	9.554	4.671	2.548	tr|G3HCD3|G3HCD3_CRIGR	Phosphoglycerate mutase family member 5 OS=Cricetulus griseus GN=I79_008141 PE=4 SV=1	CRIGR	1
	1929	1322	0.13	0.55	15.31	6.265	2.784	tr|G3IIF5|G3IIF5_CRIGR	Keratin, type II cytoskeletal 5 OS=Cricetulus griseus GN=I79_023623 PE=3 SV=1	CRIGR	1
	1930	1322	0	2.09	11.81	3.161	1.997	tr|G3IBN9|G3IBN9_CRIGR	Keratin, type II cytoskeletal 71 OS=Cricetulus griseus GN=I79_021070 PE=3 SV=1	CRIGR	1
	1931	1828	0.49	0.49	4.673	0.5607	0.5607	RRRRRtr|G3HUV4|G3HUV4_CRIGR	REVERSED Protein MICAL-2 OS=Cricetulus griseus GN=I79_014722 PE=4 SV=1	CRIGR	1
	1932	1322	0.13	0.55	15.31	6.265	2.784	tr|G3IIF5|G3IIF5_CRIGR	Keratin, type II cytoskeletal 5 OS=Cricetulus griseus GN=I79_023623 PE=3 SV=1	CRIGR	1
	1933	1545	1.35	1.38	15.87	0.9337	0.9337	tr|G3HUX3|G3HUX3_CRIGR	Rho-associated protein kinase 1 OS=Cricetulus griseus GN=I79_014743 PE=4 SV=1	CRIGR	1
	1934	2353	0.12	0.12	13.16	1.27	1.27	RRRRRtr|G3III4|G3III4_CRIGR	REVERSED AF4/FMR2 family member 1 OS=Cricetulus griseus GN=I79_023655 PE=4 SV=1	CRIGR	1
	1935	1191	0.01	2.04	8.251	1.375	1.375	tr|G3IIY8|G3IIY8_CRIGR	Dedicator of cytokinesis protein 8 OS=Cricetulus griseus GN=I79_023818 PE=4 SV=1	CRIGR	1
	1936	2373	0.11	1.72	9.141	1.982	0.6608	tr|G3HW44|G3HW44_CRIGR	Methionyl-tRNA synthetase, cytoplasmic OS=Cricetulus griseus GN=I79_015192 PE=3 SV=1	CRIGR	1
	1937	1743	0.67	0.67	9.921	1.582	1.078	tr|G3HA14|G3HA14_CRIGR	Tyrosine-protein kinase BAZ1B (Fragment) OS=Cricetulus griseus GN=I79_007253 PE=4 SV=1	CRIGR	1
	1938	2411	0.1	2.44	45.4	18.4	5.521	tr|G3IC54|G3IC54_CRIGR	60S ribosomal protein L10 OS=Cricetulus griseus GN=I79_021242 PE=4 SV=1	CRIGR	1
	1939	935	0	2.35	36.36	25.45	11.82	tr|G3GT83|G3GT83_CRIGR	60S ribosomal protein L10 OS=Cricetulus griseus GN=I79_000858 PE=4 SV=1	CRIGR	1
	1940	2411	0	2.16	40.2	21.57	12.75	tr|G3HML6|G3HML6_CRIGR	60S ribosomal protein L10 OS=Cricetulus griseus GN=I79_011983 PE=4 SV=1	CRIGR	1
	1941	2411	0	1.54	27.94	10.29	2.941	tr|G3HAA6|G3HAA6_CRIGR	60S ribosomal protein L10 OS=Cricetulus griseus GN=I79_007352 PE=4 SV=1	CRIGR	1
	1942	1607	1.07	1.07	18.82	8.39	2.268	tr|G3H4H6|G3H4H6_CRIGR	AP-1 complex subunit mu-1 OS=Cricetulus griseus GN=I79_005177 PE=4 SV=1	CRIGR	1
	1943	2466	0.1	0.1	4.202	4.202	4.202	RRRRRtr|G3ICI5|G3ICI5_CRIGR	REVERSED Survival of motor neuron-related-splicing factor 30 OS=Cricetulus griseus GN=I79_021383 PE=4 SV=1	CRIGR	1
	1944	2470	0.09	1.2	2.029	1.268	0.6762	tr|G3HG67|G3HG67_CRIGR	Tyrosine-protein kinase receptor OS=Cricetulus griseus GN=I79_009586 PE=3 SV=1	CRIGR	1
	1945	1535	1.43	1.43	7.958	1.592	1.592	tr|G3HWE6|G3HWE6_CRIGR	Ubiquitin carboxyl-terminal hydrolase 47 OS=Cricetulus griseus GN=I79_015303 PE=4 SV=1	CRIGR	1
	1946	1585	1.16	1.16	8.966	0.6462	0.6462	RRRRRtr|G3I9P2|G3I9P2_CRIGR	REVERSED Protein KIAA1199-like OS=Cricetulus griseus GN=I79_020296 PE=4 SV=1	CRIGR	1
	1947	2513	0.09	0.09	15.42	2.985	2.985	RRRRRtr|G3HVG0|G3HVG0_CRIGR	REVERSED Peroxisome proliferator-activated receptor gamma OS=Cricetulus griseus GN=I79_014947 PE=3 SV=1	CRIGR	1
	1948	2513	0	0.09	13.05	2.526	2.526	RRRRRsp|P57797|PPARG_CRIGR	REVERSED Peroxisome proliferator-activated receptor gamma OS=Cricetulus griseus GN=PPARG PE=2 SV=1	CRIGR	1
	1949	2540	0.08	0.58	7.229	2.738	0.6572	tr|B1PT31|B1PT31_CRIGR	XPF OS=Cricetulus griseus PE=2 SV=1	CRIGR	1
	1950	2540	0	0.58	7.229	2.738	0.6572	sp|Q9QYM7|XPF_CRIGR	DNA repair endonuclease XPF OS=Cricetulus griseus GN=ERCC4 PE=2 SV=3	CRIGR	1
	1951	1738	0.68	0.68	12.03	0.8021	0.8021	RRRRRtr|G3IET1|G3IET1_CRIGR	REVERSED WD repeat-containing protein 63 OS=Cricetulus griseus GN=I79_022235 PE=4 SV=1	CRIGR	1
	1952	2801	0.05	0.82	1.938	1.066	0.4845	tr|G3I5G1|G3I5G1_CRIGR	Cohesin subunit SA-3 OS=Cricetulus griseus GN=I79_018707 PE=4 SV=1	CRIGR	1
	1953	1790	0.56	0.56	18.97	3.879	3.879	tr|G3IMK2|G3IMK2_CRIGR	Tight junction protein ZO-2 OS=Cricetulus griseus GN=I79_025142 PE=4 SV=1	CRIGR	1
	1954	1518	1.52	1.52	11.44	5.473	5.473	tr|G3IAK1|G3IAK1_CRIGR	Transgelin OS=Cricetulus griseus GN=I79_020624 PE=4 SV=1	CRIGR	1
	1955	1189	2.5	2.5	26.96	10.19	3.397	tr|G3I620|G3I620_CRIGR	Aspartyl aminopeptidase OS=Cricetulus griseus GN=I79_018931 PE=3 SV=1	CRIGR	1
	1956	1324	2.02	2.02	5.669	1.155	0.6824	tr|G3HGT4|G3HGT4_CRIGR	Uncharacterized protein KIAA0564-like OS=Cricetulus griseus GN=I79_009825 PE=4 SV=1	CRIGR	1
	1957	1748	0.66	0.66	5.237	0.9975	0.9975	RRRRRtr|G3HBQ0|G3HBQ0_CRIGR	REVERSED Transducin beta-like protein 3 OS=Cricetulus griseus GN=I79_007957 PE=4 SV=1	CRIGR	1
	1958	1581	1.18	1.18	7.975	3.987	0	tr|G3HZG6|G3HZG6_CRIGR	Large proline-rich protein BAT3 OS=Cricetulus griseus GN=I79_016467 PE=4 SV=1	CRIGR	0
	1959	1652	0.92	0.93	19.16	9.501	0	tr|G3H5A9|G3H5A9_CRIGR	Exosome complex exonuclease RRP44 OS=Cricetulus griseus GN=I79_005487 PE=4 SV=1	CRIGR	0
	1960	1678	0.85	0.85	17.78	3.347	0	tr|G3HBJ9|G3HBJ9_CRIGR	Methionine aminopeptidase 2 OS=Cricetulus griseus GN=Metap2 PE=3 SV=1	CRIGR	0
	1961	1698	0.79	0.79	10.66	4.432	0	tr|G3H042|G3H042_CRIGR	Condensin complex subunit 2 OS=Cricetulus griseus GN=I79_003490 PE=3 SV=1	CRIGR	0
	1962	1706	0	0.05	1.824	1.824	0	tr|G3GTU6|G3GTU6_CRIGR	DNA repair protein RAD51-like 4 OS=Cricetulus griseus GN=I79_001085 PE=4 SV=1	CRIGR	0
	1963	1741	0.68	0.68	26.62	20.86	0	tr|G3HI99|G3HI99_CRIGR	Iron-sulfur cluster assembly enzyme ISCU, mitochondrial OS=Cricetulus griseus GN=I79_010366 PE=4 SV=1	CRIGR	0
	1964	1745	0.67	0.67	10.47	2.759	0	tr|G3IM20|G3IM20_CRIGR	Collagen alpha-1(III) chain OS=Cricetulus griseus GN=I79_024950 PE=4 SV=1	CRIGR	0
	1965	1757	0.64	0.64	16.32	3.093	0	tr|G3HG40|G3HG40_CRIGR	Eukaryotic translation initiation factor 2A OS=Cricetulus griseus GN=I79_009559 PE=4 SV=1	CRIGR	0
	1966	1758	0.64	0.64	12.32	6.786	0	tr|G3IMN3|G3IMN3_CRIGR	Gamma-adducin OS=Cricetulus griseus GN=I79_025174 PE=4 SV=1	CRIGR	0
	1967	1764	0.17	0.21	5.146	3.259	0	tr|G3HE36|G3HE36_CRIGR	Serine/threonine-protein kinase SRPK2 OS=Cricetulus griseus GN=I79_008808 PE=4 SV=1	CRIGR	0
	1968	1764	0	0.02	4.07	0.3131	0	RRRRRtr|G3HF78|G3HF78_CRIGR	REVERSED Adenomatous polyposis coli protein 2 OS=Cricetulus griseus GN=I79_009234 PE=4 SV=1	CRIGR	0
	1969	1793	0.55	0.56	16.59	9.677	0	tr|G3GTE4|G3GTE4_CRIGR	Growth factor receptor-bound protein 2 OS=Cricetulus griseus GN=I79_000924 PE=4 SV=1	CRIGR	0
	1970	1797	0.54	0.54	15.32	5.376	0	sp|Q8K3X3|GMDS_CRIGR	GDP-mannose 4,6 dehydratase OS=Cricetulus griseus GN=GMDS PE=2 SV=1	CRIGR	0
	1971	1805	0.52	0.52	22.09	22.09	0	tr|G3HMC0|G3HMC0_CRIGR	Transcriptional activator protein Pur-beta OS=Cricetulus griseus GN=I79_011872 PE=4 SV=1	CRIGR	0
	1972	1807	0.51	0.53	15.51	3.63	0	tr|G3GUS6|G3GUS6_CRIGR	2',5'-phosphodiesterase 12 OS=Cricetulus griseus GN=I79_001449 PE=4 SV=1	CRIGR	0
	1973	1825	0.49	0.73	7.708	1.318	0	RRRRRtr|G3H966|G3H966_CRIGR	REVERSED Zinc finger protein 445 OS=Cricetulus griseus GN=I79_006931 PE=4 SV=1	CRIGR	0
	1974	1827	0.49	0.49	24.19	6.047	0	tr|G3I189|G3I189_CRIGR	Putative uncharacterized protein OS=Cricetulus griseus GN=I79_017139 PE=4 SV=1	CRIGR	0
	1975	1827	0.01	0.49	25.76	5.677	0	tr|G3HSW2|G3HSW2_CRIGR	Putative uncharacterized protein OS=Cricetulus griseus GN=I79_013960 PE=4 SV=1	CRIGR	0
	1976	1827	0	0.49	23.74	5.936	0	tr|G3HCQ2|G3HCQ2_CRIGR	Putative uncharacterized protein OS=Cricetulus griseus GN=I79_008266 PE=4 SV=1	CRIGR	0
	1977	1837	0.47	0.47	14.68	4.128	0	tr|G3HX92|G3HX92_CRIGR	Protein midA-like, mitochondrial OS=Cricetulus griseus GN=I79_015611 PE=4 SV=1	CRIGR	0
	1978	1841	0.47	0.47	13.83	9.574	0	tr|G3HE59|G3HE59_CRIGR	TIP41-like protein OS=Cricetulus griseus GN=I79_008833 PE=4 SV=1	CRIGR	0
	1979	1843	0.46	0.47	27.34	8.304	0	tr|G3I054|G3I054_CRIGR	Proteasome assembly chaperone 1 OS=Cricetulus griseus GN=I79_016730 PE=4 SV=1	CRIGR	0
	1980	1845	0.46	0.46	7.419	2.782	0	tr|G3IHI0|G3IHI0_CRIGR	Cleavage and polyadenylation specificity factor subunit 3 OS=Cricetulus griseus GN=I79_023270 PE=4 SV=1	CRIGR	0
	1981	1846	0.46	0.46	18.02	5.856	0	tr|G3I5H1|G3I5H1_CRIGR	Glutathione S-transferase OS=Cricetulus griseus GN=I79_018719 PE=3 SV=1	CRIGR	0
	1982	1847	0.46	0.46	3.872	1.822	0	RRRRRtr|G3HKR7|G3HKR7_CRIGR	REVERSED Kinesin-like protein KIF9 OS=Cricetulus griseus GN=I79_011297 PE=3 SV=1	CRIGR	0
	1983	1848	0.46	0.46	2.76	1.757	0	tr|G3I958|G3I958_CRIGR	Protein DDI1-like 2 OS=Cricetulus griseus GN=I79_020092 PE=4 SV=1	CRIGR	0
	1984	1852	0.45	0.46	13.78	4	0	tr|G3H7P3|G3H7P3_CRIGR	SUMO-activating enzyme subunit 2 OS=Cricetulus griseus GN=I79_006379 PE=4 SV=1	CRIGR	0
	1985	1853	0.45	0.45	14.85	1.729	0	tr|G3GV30|G3GV30_CRIGR	Echinoderm microtubule-associated protein-like 4 (Fragment) OS=Cricetulus griseus GN=I79_001560 PE=4 SV=1	CRIGR	0
	1986	1854	0.45	0.45	10.07	0.7659	0	tr|G3HTN8|G3HTN8_CRIGR	Mitogen-activated protein kinase kinase kinase 9 OS=Cricetulus griseus GN=I79_014266 PE=4 SV=1	CRIGR	0
	1987	1854	0.02	0.45	14.06	2.811	0	tr|G3HC20|G3HC20_CRIGR	Uncharacterized protein C1orf77-like OS=Cricetulus griseus GN=I79_008064 PE=4 SV=1	CRIGR	0
	1988	1855	0.45	0.45	13.85	1.858	0	tr|G3HR69|G3HR69_CRIGR	Serine/threonine-protein phosphatase 2A 56 kDa regulatory subunit delta isoform OS=Cricetulus griseus GN=I79_013332 PE=4 SV=1	CRIGR	0
	1989	1855	0	0.43	24.64	15.94	0	tr|G3ILL6|G3ILL6_CRIGR	Serine/threonine-protein phosphatase 2A 56 kDa regulatory subunit delta isoform OS=Cricetulus griseus GN=I79_024785 PE=4 SV=1	CRIGR	0
	1990	1856	0.45	0.45	8.294	2.37	0	tr|G3IIY3|G3IIY3_CRIGR	Beta-arrestin-1 OS=Cricetulus griseus GN=I79_023811 PE=4 SV=1	CRIGR	0
	1991	1859	0.44	0.44	6.019	4.854	0	tr|G3HC47|G3HC47_CRIGR	Glucosylceramidase OS=Cricetulus griseus GN=I79_007997 PE=4 SV=1	CRIGR	0
	1992	1860	0.44	0.44	3.269	0.715	0	tr|G3GSQ1|G3GSQ1_CRIGR	Semaphorin-5B OS=Cricetulus griseus GN=I79_000669 PE=4 SV=1	CRIGR	0
	1993	1861	0.44	0.44	4.321	4.321	0	tr|G3HBM2|G3HBM2_CRIGR	Cerebellin-4 OS=Cricetulus griseus GN=I79_007856 PE=4 SV=1	CRIGR	0
	1994	1861	0	0.44	2.102	2.102	0	RRRRRtr|G3HZG8|G3HZG8_CRIGR	REVERSED Lymphotoxin-beta OS=Cricetulus griseus GN=I79_016470 PE=4 SV=1	CRIGR	0
	1995	1865	0.43	0.43	7.774	1.306	0	tr|G3H4X4|G3H4X4_CRIGR	Microtubule-associated protein OS=Cricetulus griseus GN=I79_005337 PE=4 SV=1	CRIGR	0
	1996	1868	0.43	0.43	18.23	2.762	0	tr|G3HYG1|G3HYG1_CRIGR	Replication factor C subunit 4 OS=Cricetulus griseus GN=I79_016089 PE=4 SV=1	CRIGR	0
	1997	1873	0.42	0.44	7.143	1.329	0	tr|G3HEY6|G3HEY6_CRIGR	Cytoplasmic protein NCK1 OS=Cricetulus griseus GN=I79_009134 PE=4 SV=1	CRIGR	0
	1998	1873	0	0.42	4.737	2.105	0	tr|G3H5P3|G3H5P3_CRIGR	Cytoplasmic protein NCK2 OS=Cricetulus griseus GN=I79_005627 PE=4 SV=1	CRIGR	0
[truncated: 406 more rows]

## Sheet: Table S-2
	Table S-2	Proteins restored by AMG
	Accession	Fold Change MG INS to INS	± S.E.M (MG INS)	Fold Change AMG MG INS to INS	± S.E.M (AMG MG INS )	Description	Restoration Ratio MG INS to INS / AMG MG INS to INS
	G3HQL6	1.5435	0.0452915	1.13691	0.0251753	Thioredoxin reductase 1, cytoplasmic OS	1.35763
	G3HZ42	1.41254	0.0264801	1.13492	0.00820102	T-complex protein 1 subunit beta OS	1.24462
	O35501	1.42613	0.03863	1.19858	0.0228087	Stress-70 protein, mitochondrial OS	1.18985
	G3I2M1	1.25242	0.0148804	1.12165	0.00781972	T-complex protein 1 subunit zeta OS	1.11659
	G3HL13	1.22576	0.0746827	1.10102	0.035527	60 kDa heat shock protein, mitochondrial OS	1.11329
	G3IHY5	1.17349	0.0600552	1.08863	0.0186693	6-phosphogluconate dehydrogenase, decarboxylating OS	1.07794
	G3GZ85	0.863703	0.00905414	0.860248	0.00780434	Nuclease domain-containing protein 1 OS	1.00402
	Q60438	0.660387	0.054006	0.701784	0.001019	Cysteine-rich with EGF-like domain protein 2 OS	0.941012
	G3IGW0	0.717714	0.0524059	0.768297	0.0282947	Protein CTLA-2-beta OS	0.934163
	G3H4I2	0.677005	0.0104543	0.745312	0.0591348	Tropomyosin beta chain OS	0.908351
	G3IDT6	0.636818	0.00261493	0.721809	0.00953116	Protein disulfide-isomerase A4 OS	0.882253
	G3HQM6	0.676524	0.00641955	0.774337	0.0169606	Endoplasmin OS	0.873681
	G3H8A8	0.696927	0.0297625	0.807544	0.0257976	Mesencephalic astrocyte-derived neurotrophic factor OS	0.863021
	G3IH63	0.728381	0.00918268	0.862696	0.0164681	Myosin-9 OS	0.844308
	G3HB04	0.645054	0.0233939	0.769579	0.0189366	Protein disulfide-isomerase A6 OS	0.838192
	G3IKC3	0.729737	0.0277926	0.887235	0.0044015	Glutathione S-transferase Mu 6 OS	0.822484
	G3HNK4	0.705381	0.0447603	0.860791	0.023405	Dihydropyrimidinase-related protein 2 OS	0.819457
	G3I064	0.715723	0.0122335	0.883725	0.00361217	Neutral alpha-glucosidase AB OS	0.809893
	G3I4Z7	0.661186	0.0198539	0.820011	0.0262836	Galectin OS	0.806314
	G3H5D5	0.619953	0.0761269	0.798021	0.000460536	Acyl-CoA-binding protein OS	0.776863
	G3GRK8	0.648451	0.0470002	0.841456	0.0285502	E3 ubiquitin-protein ligase NEDD4 OS	0.77063
	G3HD97	0.677351	0.0345299	0.882464	0.00501563	Thioredoxin domain-containing protein 5 OS	0.767567
	G3I973	0.634477	0.000792359	0.847006	0.00584326	Hypoxia up-regulated protein 1 OS	0.749082
	G3IDD4	0.474163	0.0378355	0.780064	0.0118312	Serpin H1 OS	0.607852
	G3HC39	0.362714	0.013457	0.725073	0.017998	Farnesyl pyrophosphate synthetase OS	0.500245
